# Supplementary material for: Catalyst-free photodecarbonylation of ortho-amino benzaldehyde
Source: Royal Society of Chemistry journal article supplement (doi:10.1039/d0gc01256d), 2020-01-01
Supplement: d0gc01256d1.pdf [file d0gc01256d1.pdf]

## Supporting information

### **Catalyst-Free Photodecarbonylation of *ortho*-Amino Benzaldehyde**

Jingwei Zhou,<sup>[a]</sup> Lamei Li,<sup>[a]</sup> Songping Wang,<sup>[a]</sup> Ming Yan,<sup>[b]</sup> and Wentao Wei\*<sup>[a]</sup>

<sup>a</sup> *Institute of clinical pharmacology, Science and Technology Innovation Center, Guangzhou University of Chinese Medicine, Guangzhou 510405, People's Republic of China*

<sup>b</sup> *Institute of Drug Synthesis and Pharmaceutical Process, School of Pharmaceutical Sciences, Sun Yat-sen University, Guangzhou 510006, People's Republic of China*

## Table of Contents

|                                                        |             |
|--------------------------------------------------------|-------------|
| <b>1. General Information</b>                          | <b>S1</b>   |
| <b>2. General Procedures</b>                           | <b>S2</b>   |
| <b>3. Computational Method</b>                         | <b>S4</b>   |
| <b>4. References</b>                                   | <b>S4</b>   |
| <b>5. Characterization Data</b>                        | <b>S5</b>   |
| <b>6. <sup>1</sup>H and <sup>13</sup>C NMR Spectra</b> | <b>S29</b>  |
| <b>7. Molecular Coordinates and Free Energies</b>      | <b>S113</b> |

### 1. General Information

<sup>1</sup>H NMR and <sup>13</sup>C NMR spectra were recorded on Bruker AVANCE 400 and 500 spectrometer. Chemical shifts of protons were reported in parts per million downfield from tetramethylsilane and were referenced to residual protium in the NMR solvent (CDCl<sub>3</sub>; δ 7.26). Chemical shifts of carbon were referenced to the carbon resonances of the solvent (CDCl<sub>3</sub>; δ 77.0). Peaks were labeled as singlet (s), doublet (d), triplet (t), quartet (q) and multiplet (m). Melting points were measured on a WRS-2A melting point apparatus and were uncorrected. All products were further characterized by HRMS (high resolution mass spectra). Copies of their <sup>1</sup>H NMR and <sup>13</sup>C NMR spectra were provided. Substrates of **1be** and **1bf** were purchased from *J&K* and used without further purification.

## 2. General Procedures

### (I) Typical procedure for the preparation of substrates **1a-1f**, **1i**, **1p-1q**, **1aa-1ar**, **1bb-1bd**.

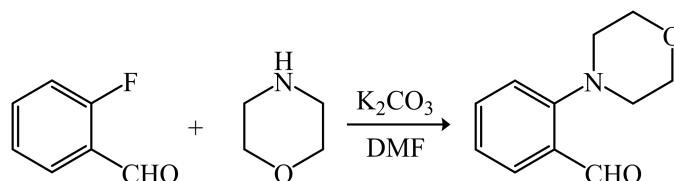

The compound was synthesized according to a known procedure.<sup>[1]</sup> To a solution of potassium carbonate (0.83 g, 6.0 mmol) in *N,N*-Dimethylformamide (10 mL), 2-fluorobenzaldehyde (0.62 g, 5.0 mmol) and morpholine (0.53 g, 6 mmol) were added. The reaction mixture was stirred at 100 °C for 15 h. After completion of the reaction as shown by TLC, water (30 mL) was used to dilute the reaction. The organic layer was extracted with ethyl acetate (20 mL  $\times$  3), the combined organic layer was washed with saturated  $NH_4Cl$  (20 mL), dried with anhydrous sodium sulfate and concentrated in vacuum. The crude production was purified by flash chromatography to give a yellow oil **1a** (0.71 g, yield: 75%).

### (II) Typical procedure for the preparation of substrates **1g-1h**, **1j-1o**, **1bi-1bj**, **1bl-1bn**.

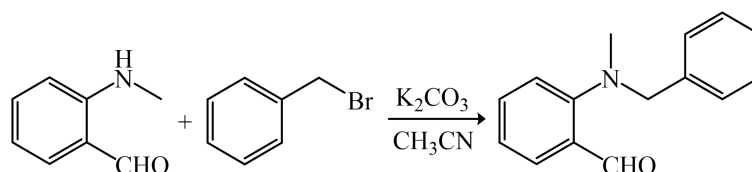

The compound was synthesized according to the similar procedures.<sup>[2]</sup> To a solution of 2-(methylamino)benzaldehyde (405 mg, 3 mmol) in acetonitrile (15 mL) was added benzyl bromide (770 mg, 4.5 mmol),  $K_2CO_3$  (621 mg, 4.5 mmol). The reaction mixture was allowed to stir at 65 °C for 15h. After completion of the reaction as shown by TLC, the mixture was allowed to cool to room temperature, and the crude production was purified by flash chromatography, giving a yellow oil **1j** (473 mg, yield: 70%).

### (III) Typical procedure for the preparation of substrate **1ba**.

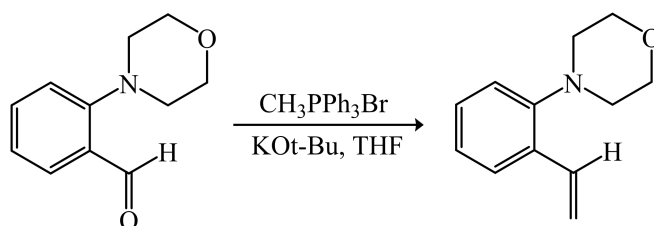

The compound was synthesized according to the similar procedures.<sup>[3]</sup> A mixture of  $CH_3PPh_3Br$  (3.6 mmol) and  $KOt-Bu$  (3.9 mmol) in dry THF (30 mL) was stirred at 0

°C for 1 h. After the addition of 2-morpholinobenzaldehyde (3 mmol) at 0 °C, the reaction mixture was stirred overnight at r.t. The solvent was evaporated under reduced pressure. The residue was purified by column chromatography over silica gel, giving a colorless oil **1ba** (397 mg, yield: 70%).

**(IV) Typical procedure for the preparation of substrates 1bg-1bh.**

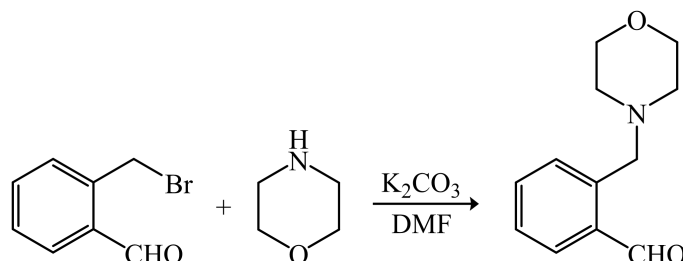

The compound was synthesized according to the similar procedures.<sup>[1]</sup> To a solution of 2-(bromomethyl)benzaldehyde (995 mg, 5 mmol) in DMF (15 mL) was added morpholine (435 mg, 5 mmol),  $K_2CO_3$  (690 mg, 5 mmol). The reaction mixture was allowed to stir at 125 °C for 12 h. After completion of the reaction as shown by TLC. The mixture was allowed to cool to room temperature, and the crude production was purified by flash chromatography, giving a yellow oil **1bg** (337 mg, yield: 32.9%).

**(V) Typical procedure for the preparation of substrate 1bk.**

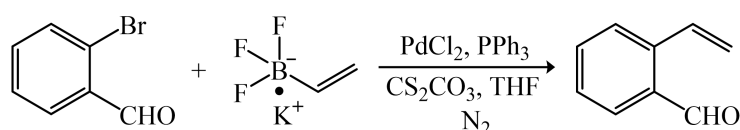

The compound was synthesized according to the similar procedures.<sup>[4]</sup> To a solution of 2-bromobenzaldehyde (925 mg, 5 mmol) in THF (15 mL),  $H_2O$  (2 mL) was added potassium vinyltrifluoroborate (680 mg, 5 mmol),  $PdCl_2$  (20 mg, 2 mol%),  $PPh_3$  (79.8 mg, 6 mol%),  $CS_2CO_3$  (2450 mg, 10 mmol). The reaction mixture was allowed to stir at 85 °C for 24h. After completion of the reaction as shown by TLC, water (30 mL) was used to dilute the reaction. The organic layer was extracted with ethyl acetate (20 mL  $\times$  3), the combined organic layer was washed with saturated  $NH_4Cl$  (20 mL), dried with anhydrous sodium sulfate and concentrated in vacuum. The crude production was purified by flash chromatography, giving a yellow oil **1bk** (396 mg, yield: 60%).

**(VI) Typical procedure for photodecarbonylation of 2-Amine Benzaldehyde.**

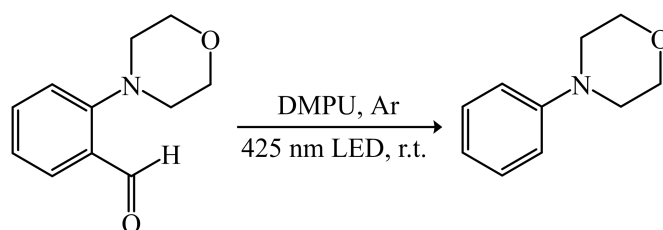



2-morpholinobenzaldehyde **1a** (57.3 mg, 0.3 mmol) was added to 10 mL quartz tube containing 2 mL DMPU, the reaction mixture was stirred at room temperature under irradiation of 425 nm LED in argon atmosphere condition for 6 h. After completion of the reaction as shown by TLC, water (3 mL) was used to dilute the reaction. The organic layer was extracted with ethyl acetate (5 mL × 3). The combined organic layer was washed with saturated NH<sub>4</sub>Cl (5 mL), dried with anhydrous sodium sulfate and concentrated in vacuum. The crude product was purified by flash chromatography to give a yellow oil **2a** (36.6 mg, yield: 75%).

### 3. Computational Method

All the geometry optimization and vibration frequency calculation were carried out in Gaussian09 package.<sup>[5]</sup> Meanwhile, the density-functional theory (DFT)<sup>[6]</sup> and the time-dependent density-functional theory (TD-DFT)<sup>[7]</sup> were employed for the computations of ground state and the excited state, respectively. For geometry optimization, both the ground state molecules and the excited state molecules were performed at the B3LYP method<sup>[8]</sup> with 6-31+G(d, p) basis set<sup>[9]</sup>. For vibration frequency calculation, same computational method and basis set were carried out to make sure that the optimized structures were true energy minima, and obtain the absolute free energies of the optimized ground state molecules and excited state molecules. The reaction coordinate driving method (flexible scan) as well as the following restricted geometry optimization and the corresponding vibration frequency were employed to calculate the free energy profiles from O-State to H-State for the selected ground state molecules and excited state molecules also at the same computational method and basis set. The reaction coordinate from O-State to H-State was the rotation dihedral of aldehyde group. All the above calculations considered the solvation effect (DMPU) provided by the PCM solvent continuum models.<sup>[10]</sup>

### 4. References

- (1) S. Z. Nie, X. Sun, W. T. Wei, X. J. Zhang, M. Yan and J. L. Xiao, *Org. Lett.* 2013, **15**, 2394.
- (2) A. O. Adeniji, B. M. Twenter, M. C. Byrns, Y. Jin, M. Chen, J. D. Winkler and T. M. Penning, *J. Med. Chem.* 2012, **55**, 2311.
- (3) A. K. Zulfiqar, I. Michio and W. Thomas, *Tetrahedron* 2010, **66**, 6639.
- (4) Y. Hu, Y. J. Xie, Z. Q. Shen and H. M. Huang, *Angew. Chem. Int. Ed.* 2017, **56**, 2473.
- (5) M. J. Frisch, G. W. Trucks, H. B. Schlegel, G. E. Scuseria, M. A. Robb, J. R. Cheeseman, G. Scalmani, V. Barone, B. Mennucci, G. A. Petersson, H. Nakatsuji, M. Caricato, X. Li, H. P. Hratchian, A. F. Izmaylov, J. Bloino, G. Zheng, J. L. Sonnenberg, M. Hada, M. Ehara, K. Toyota, R. Fukuda, J. Hasegawa, M. Ishida, T. Nakajima, Y. Honda, O. Kitao, H. Nakai, T. Vreven, J. A. Montgomery Jr, J. E. Peralta, F. Ogliaro, M. Bearpark, J. J. Heyd, E. Brothers, K. N. Kudin, V. N. Staroverov, R. Kobayashi, J. Normand, K. Raghavachari, A. Rendell, J. C. Burant, S. S. Iyengar, J. Tomasi, M. Cossi, N. Rega, J. M. Millam, M. Klene, J. E. Knox, J. B. Cross, V. Bakken, C. Adamo, J. Jaramillo, R. Gomperts, R. E. Stratmann, O. Yazyev, A. J. Austin, R. Cammi, C. Pomelli, J. W. Ochterski, R. L. Martin, K. Morokuma, V. G. Zakrzewski, G. A. Voth, P. Salvador, J. J. Dannenberg, S. Dapprich, A. D. Daniels, Ö. Farkas, J. B.

Foresman, J. V. Ortiz, J. Cioslowski and D. J. Fox, *In Gaussian, Inc., Wallingford CT*. 2009.

(6) W. Kohn, *Rev. Mod. Phys.* 1999, **71**, 1253.

(7) E. Runge and E. K. U. Gross, *Phys. Rev. Lett.* 1984, **52**, 997.

(8) C. Lee and W. Yang, R. G. Parr, *Phys. Rev. B* 1988, **37**, 785.

(9) A. D. McLean and G. S. Chandler, *J. Chem. Phys.* 1980, **72**, 5639.

(10) E. Cancès, B. Mennucci and J. Tomasi, *J. Chem. Phys.* 1997, **107**, 3032.

## 5. Characterization Data

### 2-morpholinobenzaldehyde (1a)

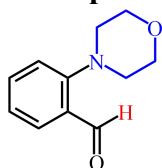

Yellow oil.  $^1\text{H NMR}$  (400 MHz,  $\text{CDCl}_3$ )  $\delta$  10.36 (s, 1H), 7.85 (dd,  $J = 7.6, 1.5$  Hz, 1H), 7.57 (td,  $J = 8.0, 1.6$  Hz, 1H), 7.18 (t,  $J = 8.7$  Hz, 2H), 3.98-3.89 (m, 4H), 3.17-3.08 (m, 4H).  $^{13}\text{C NMR}$  (125 MHz,  $\text{CDCl}_3$ )  $\delta$  191.19, 155.29, 135.12, 130.33, 128.67, 122.95, 118.87, 66.93, 54.17. **HRMS** (ESI) calculated for  $\text{C}_{11}\text{H}_{14}\text{NO}_2$  ( $\text{M}+\text{H}$ ) $^+$ : 192.1019, found: 192.1021.

### 2-(2, 6-dimethylmorpholino)benzaldehyde (1b)

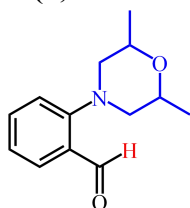

Pale yellow solid. M. p. 94-95 °C.  $^1\text{H NMR}$  (400 MHz,  $\text{CDCl}_3$ )  $\delta$  10.33 (s, 1H), 7.82 (dd,  $J = 7.6, 1.1$  Hz, 1H), 7.57-7.43 (m, 1H), 7.13 (dd,  $J = 18.2, 7.9$  Hz, 2H), 4.05-3.73 (m, 2H), 3.09 (d,  $J = 11.4$  Hz, 2H), 2.66 (t,  $J = 11.0$  Hz, 2H), 1.24 (d,  $J = 6.3$  Hz, 6H).  $^{13}\text{C NMR}$  (100 MHz,  $\text{CDCl}_3$ )  $\delta$  191.30, 155.08, 135.09, 130.18, 128.63, 122.76, 119.00, 71.81, 59.71, 18.84. **HRMS** (ESI) calculated for  $\text{C}_{13}\text{H}_{18}\text{NO}_2$  ( $\text{M}+\text{H}$ ) $^+$ : 220.1332, found: 220.1331.

### 2-(piperidin-1-yl)benzaldehyde (1c)

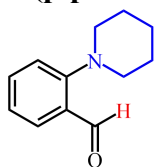

Yellow oil.  $^1\text{H NMR}$  (400 MHz,  $\text{CDCl}_3$ )  $\delta$  10.32 (s, 1H), 7.81 (dd,  $J = 7.7, 1.7$  Hz, 1H), 7.58-7.40 (m, 1H), 7.12 (d,  $J = 8.3$  Hz, 1H), 7.08 (t,  $J = 7.5$  Hz, 1H), 3.13-3.01 (m, 4H), 1.84-1.73 (m, 4H), 1.69-1.58 (m, 2H).  $^{13}\text{C NMR}$  (125 MHz,  $\text{CDCl}_3$ )  $\delta$

191.73, 134.84, 129.21, 128.63, 121.99, 119.01, 55.63, 26.19, 24.05. **HRMS** (ESI) calculated for C<sub>12</sub>H<sub>16</sub>NO (M+H)<sup>+</sup>: 190.1227, found: 190.1225.

### 2-(2-methylpiperidin-1-yl)benzaldehyde (1d)

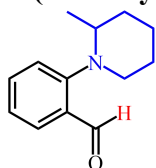

Yellow oil. **<sup>1</sup>H NMR** (400 MHz, CDCl<sub>3</sub>) δ 10.52 (s, 1H), 7.83 (dd, J = 7.7, 1.6 Hz, 1H), 7.53 (td, J = 8.1, 1.7 Hz, 1H), 7.23 (d, J = 8.1 Hz, 1H), 7.15 (t, J = 7.5 Hz, 1H), 3.19 (td, J = 6.5, 3.3 Hz, 1H), 3.14-3.01 (m, 1H), 2.83 (ddd, J = 11.8, 8.1, 3.7 Hz, 1H), 1.94-1.84 (m, 1H), 1.82-1.64 (m, 3H), 1.58-1.42 (m, 2H), 0.91 (d, J = 6.3 Hz, 3H). **<sup>13</sup>C NMR** (125 MHz, CDCl<sub>3</sub>) δ 192.63, 156.46, 134.59, 131.58, 128.13, 123.54, 122.78, 56.81, 53.55, 33.60, 26.40, 22.53, 17.87. **HRMS** (ESI) calculated for C<sub>13</sub>H<sub>18</sub>NO (M+H)<sup>+</sup>: 204.1383, found: 204.1387.

### 2-(azepan-1-yl)benzaldehyde (1e)

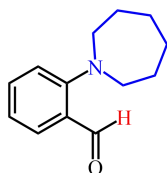

Yellow oil. **<sup>1</sup>H NMR** (400 MHz, CDCl<sub>3</sub>) δ 10.22 (s, 1H), 7.75 (dd, J = 7.8, 1.7 Hz, 1H), 7.43 (t, J = 8.7 Hz, 1H), 7.10 (d, J = 8.4 Hz, 1H), 6.95 (t, J = 7.4 Hz, 1H), 3.53-3.28 (m, 4H), 1.83 (s, 4H), 1.75-1.65 (m, 4H). **<sup>13</sup>C NMR** (125 MHz, CDCl<sub>3</sub>) δ 191.34, 156.19, 134.26, 130.61, 126.75, 119.57, 118.63, 55.98, 28.70, 27.73. **HRMS** (ESI) calculated for C<sub>13</sub>H<sub>18</sub>NO (M+H)<sup>+</sup>: 204.1383, found: 204.1381.

### 2-(4-phenylpiperazin-1-yl)benzaldehyde (1f)

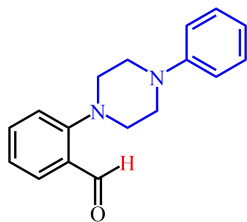

Pale yellow solid. M. p. 112-113 °C. **<sup>1</sup>H NMR** (400 MHz, CDCl<sub>3</sub>) δ 10.42 (s, 1H), 7.87 (dd, J = 7.6, 1.6 Hz, 1H), 7.63-7.54 (m, 1H), 7.34 (dd, J = 8.5, 7.4 Hz, 2H), 7.19 (dd, J = 12.0, 5.2 Hz, 2H), 7.03 (d, J = 8.1 Hz, 2H), 6.94 (t, J = 7.3 Hz, 1H), 3.42 (dd, J = 6.0, 3.7 Hz, 4H), 3.29 (dd, J = 6.1, 3.7 Hz, 4H). **<sup>13</sup>C NMR** (100 MHz, CDCl<sub>3</sub>) δ 191.34, 155.44, 151.09, 135.10, 130.03, 129.26, 128.81, 122.94, 120.27, 119.06, 116.42, 54.02, 49.50. **HRMS** (ESI) calculated for C<sub>17</sub>H<sub>19</sub>N<sub>2</sub>O (M+H)<sup>+</sup>: 267.1492, found: 267.1490.

### 2-(dimethylamino)benzaldehyde (1g)

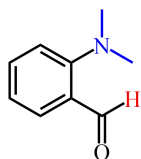

Yellow oil.  $^1\text{H NMR}$  (400 MHz,  $\text{CDCl}_3$ )  $\delta$  10.22 (s, 1H), 7.76 (d,  $J = 7.7$  Hz, 1H), 7.45 (dd,  $J = 11.0, 4.5$  Hz, 1H), 7.04 (d,  $J = 8.3$  Hz, 1H), 6.99 (t,  $J = 7.4$  Hz, 1H), 2.92 (s, 3H), 2.91 (s, 3H).  $^{13}\text{C NMR}$  (100 MHz,  $\text{CDCl}_3$ )  $\delta$  191.18, 155.74, 134.61, 130.95, 127.01, 120.64, 117.65, 45.54. **HRMS** (ESI) calculated for  $\text{C}_9\text{H}_{12}\text{NO}$  ( $\text{M}+\text{H}$ ) $^+$ : 150.0914, found: 150.0915.

### 2-(allyl(methyl)amino)benzaldehyde (1h)

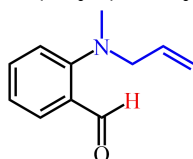

Yellow oil.  $^1\text{H NMR}$  (400 MHz,  $\text{CDCl}_3$ )  $\delta$  10.28 (s, 1H), 7.80 (dd,  $J = 7.7, 1.6$  Hz, 1H), 7.57–7.41 (m, 1H), 7.10 (d,  $J = 8.3$  Hz, 1H), 7.04 (t,  $J = 7.4$  Hz, 1H), 5.93 (ddt,  $J = 16.2, 10.3, 5.9$  Hz, 1H), 5.27 (ddd,  $J = 13.7, 11.5, 1.4$  Hz, 2H), 3.75 (d,  $J = 5.8$  Hz, 2H), 2.87 (s, 3H).  $^{13}\text{C NMR}$  (126 MHz,  $\text{CDCl}_3$ )  $\delta$  191.38, 155.52, 134.54, 134.10, 130.25, 127.82, 121.22, 118.93, 117.92, 62.02, 41.05. **HRMS** (ESI) calculated for  $\text{C}_{11}\text{H}_{14}\text{NO}$  ( $\text{M}+\text{H}$ ) $^+$ : 176.1070, found: 176.1072.

### 2-((2-methoxyethyl)(methyl)amino)benzaldehyde (1i)

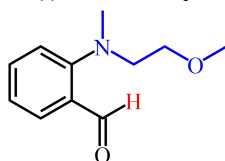

Yellow oil.  $^1\text{H NMR}$  (400 MHz,  $\text{CDCl}_3$ )  $\delta$  10.32 (s, 1H), 7.78 (dd,  $J = 7.7, 1.7$  Hz, 1H), 7.48 (ddd,  $J = 8.4, 7.2, 1.8$  Hz, 1H), 7.15 (d,  $J = 8.2$  Hz, 1H), 7.05 (t,  $J = 7.5$  Hz, 1H), 3.58 (t,  $J = 5.7$  Hz, 2H), 3.37–3.25 (m, 5H), 2.95 (s, 3H).  $^{13}\text{C NMR}$  (125 MHz,  $\text{CDCl}_3$ )  $\delta$  191.69, 155.75, 134.58, 130.13, 128.41, 121.65, 119.53, 70.50, 58.81, 57.93, 42.45. **HRMS** (ESI) calculated for  $\text{C}_{11}\text{H}_{16}\text{NO}_2$  ( $\text{M}+\text{H}$ ) $^+$ : 194.1176, found: 194.1179.

### 2-(benzyl(methyl)amino)benzaldehyde (1j)

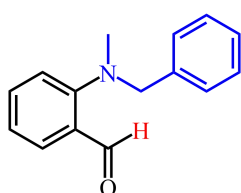

Yellow oil.  $^1\text{H NMR}$  (400 MHz,  $\text{CDCl}_3$ )  $\delta$  10.42 (s, 1H), 7.85 (dd,  $J = 7.7, 1.7$  Hz, 1H), 7.54–7.45 (m, 1H), 7.35 (dd,  $J = 7.7, 6.5$  Hz, 2H), 7.30 (dd,  $J = 7.4, 4.0$  Hz, 3H), 7.10 (dd,  $J = 16.6, 8.0$  Hz, 2H), 4.36 (s, 2H), 2.84 (s, 3H).  $^{13}\text{C NMR}$  (125 MHz,

CDCl<sub>3</sub>)  $\delta$  191.33, 155.70, 137.40, 134.71, 130.20, 128.57, 128.13, 128.03, 127.48, 121.67, 119.53, 62.39, 42.37. HRMS (ESI) calculated for C<sub>15</sub>H<sub>16</sub>NO (M+H)<sup>+</sup>: 226.1227, found: 226.1226.

### 2-((4-methoxybenzyl)(methyl)amino)benzaldehyde (1k)

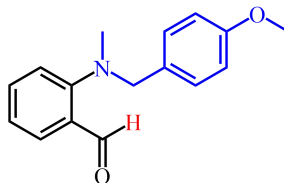

Yellow oil. <sup>1</sup>H NMR (500 MHz, CDCl<sub>3</sub>)  $\delta$  10.39 (d, J = 10.8 Hz, 1H), 7.81 (dd, J = 7.7, 1.3 Hz, 1H), 7.51-7.40 (m, 1H), 7.15 (d, J = 8.5 Hz, 2H), 7.05 (dd, J = 14.9, 7.8 Hz, 2H), 6.84 (d, J = 8.5 Hz, 2H), 4.25 (s, 2H), 3.77 (s, 3H), 2.77 (s, 3H). <sup>13</sup>C NMR (125 MHz, CDCl<sub>3</sub>)  $\delta$  191.38, 158.98, 155.73, 134.70, 130.09, 129.35, 129.32, 128.17, 121.64, 119.64, 113.90, 61.97, 55.27, 42.06. HRMS (ESI) calculated for C<sub>16</sub>H<sub>18</sub>NO<sub>2</sub> (M+H)<sup>+</sup>: 256.1332, found: 256.1334.

### 4-(((2-formylphenyl)(methyl)amino)methyl)benzonitrile (1l)

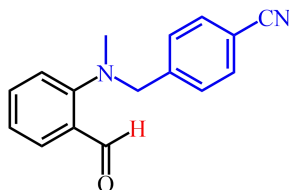

Yellow oil, <sup>1</sup>H NMR (500 MHz, CDCl<sub>3</sub>)  $\delta$  10.36 (s, 1H), 7.84 (dd, J = 7.7, 1.7 Hz, 1H), 7.64 (d, J = 8.2 Hz, 2H), 7.54-7.49 (m, 1H), 7.44 (d, J = 8.2 Hz, 2H), 7.13 (dd, J = 15.2, 7.8 Hz, 2H), 4.40 (s, 2H), 2.84 (s, 3H). <sup>13</sup>C NMR (125 MHz, CDCl<sub>3</sub>)  $\delta$  190.89, 154.75, 143.17, 134.89, 132.37, 131.16, 128.61, 128.25, 122.29, 119.52, 118.72, 111.37, 61.51, 42.82. HRMS (ESI) calculated for C<sub>16</sub>H<sub>15</sub>N<sub>2</sub>O (M+H)<sup>+</sup>: 251.1179, found: 251.1175.

### 2-(benzyl(ethyl)amino)benzaldehyde (1m)

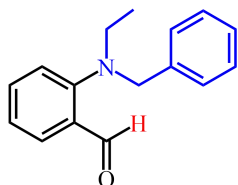

Yellow oil. <sup>1</sup>H NMR (400 MHz, CDCl<sub>3</sub>)  $\delta$  10.51 (s, 1H), 7.85 (dd, J = 7.7, 1.7 Hz, 1H), 7.53-7.46 (m, 1H), 7.34-7.26 (m, 5H), 7.18 (d, J = 8.1 Hz, 1H), 7.12 (t, J = 7.5 Hz, 1H), 4.35 (s, 2H), 3.21 (q, J = 7.1 Hz, 2H), 1.10 (t, J = 7.1 Hz, 3H). <sup>13</sup>C NMR (125 MHz, CDCl<sub>3</sub>)  $\delta$  191.75, 154.50, 137.85, 134.42, 130.35, 129.16, 128.46, 128.32, 127.32, 122.69, 122.03, 58.41, 49.60, 11.87. HRMS (ESI) calculated for C<sub>16</sub>H<sub>18</sub>NO (M+H)<sup>+</sup>: 240.1383, found: 240.1380.

### 2-(benzyl(butyl)amino)benzaldehyde (1n)

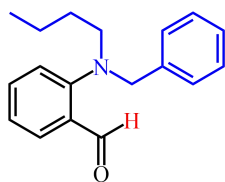

Yellow oil. **<sup>1</sup>H NMR** (400 MHz, CDCl<sub>3</sub>) δ 10.49 (s, 1H), 7.84 (dd, J = 7.7, 1.7 Hz, 1H), 7.49 (ddd, J = 8.3, 7.3, 1.8 Hz, 1H), 7.34-7.22 (m, 5H), 7.17 (d, J = 8.2 Hz, 1H), 7.11 (t, J = 7.5 Hz, 1H), 4.35 (s, 2H), 3.21-3.04 (m, 2H), 1.63-1.42 (m, 2H), 1.28 (dq, J = 14.7, 7.3 Hz, 2H), 0.87 (t, J = 7.4 Hz, 3H). **<sup>13</sup>C NMR** (125 MHz, CDCl<sub>3</sub>) δ 191.69, 154.82, 137.71, 134.40, 130.20, 129.26, 128.42, 128.38, 127.33, 122.57, 121.98, 59.68, 54.37, 29.02, 20.28, 13.89. **HRMS** (ESI) calculated for C<sub>18</sub>H<sub>22</sub>NO (M+H)<sup>+</sup>: 268.1696, found: 268.1695.

### 2-(dibenzylamino)benzaldehyde (1o)

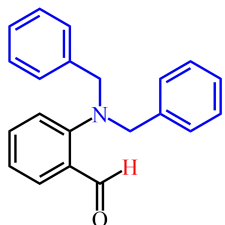

Yellow oil. **<sup>1</sup>H NMR** (400 MHz, CDCl<sub>3</sub>) δ 10.40 (s, 1H), 7.87 (dd, J = 7.7, 1.4 Hz, 1H), 7.66-7.56 (m, 1H), 7.28 (s, 1H), 7.22 (t, J = 7.5 Hz, 1H), 3.38 (s, 4H). **<sup>13</sup>C NMR** (125 MHz, CDCl<sub>3</sub>) δ 191.36, 154.45, 137.14, 134.46, 129.85, 129.59, 128.59, 128.45, 127.46, 122.92, 122.42, 58.72. **HRMS** (ESI) calculated for C<sub>21</sub>H<sub>20</sub>NO (M+H)<sup>+</sup>: 302.1540, found: 302.1538.

### 2-(3, 4-dihydroisoquinolin-2(1H)-yl)benzaldehyde (1p)

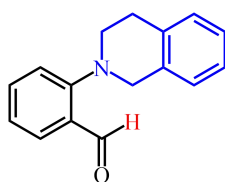

Yellow oil. **<sup>1</sup>H NMR** (400 MHz, CDCl<sub>3</sub>) δ 10.35 (s, 1H), 7.87 (d, J = 7.7 Hz, 1H), 7.55 (t, J = 7.7 Hz, 1H), 7.27 – 7.17 (m, 4H), 7.13 (d, J = 7.2 Hz, 2H), 4.35 (s, 2H), 3.47 (t, J = 5.3 Hz, 2H), 3.08 (t, J = 5.6 Hz, 2H). **<sup>13</sup>C NMR** (100 MHz, CDCl<sub>3</sub>) δ 191.38, 155.20, 134.91, 134.24, 134.08, 130.04, 128.99, 128.61, 126.61, 126.37, 126.11, 122.30, 119.03, 54.80, 53.55, 29.05. **HRMS** (ESI) calculated for C<sub>16</sub>H<sub>16</sub>NO (M+H)<sup>+</sup>: 238.1227, found: 238.1225.

### 2-(pyrrolidin-1-yl)benzaldehyde (1q)

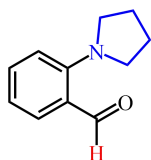

Yellow oil.  $^1\text{H NMR}$  (400 MHz,  $\text{CDCl}_3$ )  $\delta$  10.11 (s, 1H), 7.72 (dd,  $J = 7.8, 1.7$  Hz, 1H), 7.40 (ddd,  $J = 8.6, 7.0, 1.8$  Hz, 1H), 6.86-6.81 (m, 2H), 3.41-3.35 (m, 4H), 2.03-1.98 (m, 4H).  $^{13}\text{C NMR}$  (125 MHz,  $\text{CDCl}_3$ )  $\delta$  190.14, 149.97, 134.23, 133.11, 122.98, 116.44, 114.54, 52.72, 25.97. **HRMS** (ESI) calculated for  $\text{C}_{11}\text{H}_{14}\text{NO}$  ( $\text{M}+\text{H}$ ) $^+$ : 176.1070, found: 176.1068.

### 2-fluoro-6-morpholinobenzaldehyde (1aa)

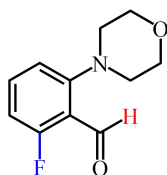

Yellow solid. M. p. 65-67 °C.  $^1\text{H NMR}$  (400 MHz,  $\text{CDCl}_3$ )  $\delta$  10.30 (s, 1H), 7.47 (td,  $J = 8.3, 6.4$  Hz, 1H), 6.84 (d,  $J = 8.3$  Hz, 1H), 6.80-6.73 (m, 1H), 3.98-3.82 (m, 4H), 3.15-2.98 (m, 4H).  $^{13}\text{C NMR}$  (125 MHz,  $\text{CDCl}_3$ )  $\delta$  187.04 (d,  $^3J_{\text{CF}} = 7.0$  Hz), 164.79 (d,  $^1J_{\text{CF}} = 259.1$  Hz), 155.19 (d,  $^3J_{\text{CF}} = 3.8$  Hz), 135.86 (d,  $^3J_{\text{CF}} = 11.9$  Hz), 116.79 (d,  $^2J_{\text{CF}} = 7.0$  Hz), 114.11 (d,  $^4J_{\text{CF}} = 3.2$  Hz), 109.51 (d,  $^2J_{\text{CF}} = 21.8$  Hz), 66.84, 53.61. **HRMS** (ESI) calculated for  $\text{C}_{11}\text{H}_{13}\text{NO}_2\text{F}$  ( $\text{M}+\text{H}$ ) $^+$ : 210.0925, found: 210.0921.

### 3-chloro-2-morpholinobenzaldehyde (1ab)

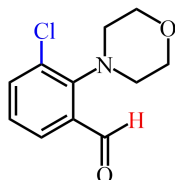

Pale yellow solid. M. p. 104-105 °C.  $^1\text{H NMR}$  (400 MHz,  $\text{CDCl}_3$ )  $\delta$  10.59 (s, 1H), 7.74 (dd,  $J = 7.7, 1.6$  Hz, 1H), 7.58 (dd,  $J = 7.9, 1.6$  Hz, 1H), 7.24 (d,  $J = 7.9$  Hz, 1H), 3.85 (t,  $J = 4.3$  Hz, 4H), 3.33 (s, 4H).  $^{13}\text{C NMR}$  (125 MHz,  $\text{CDCl}_3$ )  $\delta$  191.82, 150.26, 136.72, 135.78, 134.09, 127.56, 126.66, 67.43, 50.85. **HRMS** (ESI) calculated for  $\text{C}_{11}\text{H}_{13}\text{NO}_2\text{Cl}$  ( $\text{M}+\text{H}$ ) $^+$ : 226.0630, found: 226.0633.

### 2-chloro-6-morpholinobenzaldehyde (1ac)

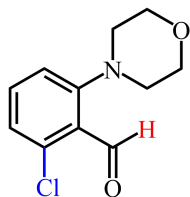

Pale yellow solid. M. p. 76-77 °C.  $^1\text{H NMR}$  (400 MHz,  $\text{CDCl}_3$ )  $\delta$  10.36 (s, 1H), 7.40 (t,  $J = 8.1$  Hz, 1H), 7.10 (d,  $J = 7.9$  Hz, 1H), 7.02 (d,  $J = 8.3$  Hz, 1H), 4.03-3.79 (m,

4H), 3.16-3.01 (m, 4H).  $^{13}\text{C}$  NMR (100 MHz,  $\text{CDCl}_3$ )  $\delta$  189.32, 155.63, 137.18, 134.26, 125.68, 124.56, 117.45, 66.84, 53.70. HRMS (ESI) calculated for  $\text{C}_{11}\text{H}_{13}\text{NO}_2\text{Cl}$  ( $\text{M}+\text{H}$ ) $^+$ : 226.0630, found: 226.0630.

#### 4-chloro-2-morpholinobenzaldehyde (1ad)

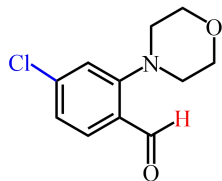

Pale yellow solid. M. p. 79-80 °C.  $^1\text{H}$  NMR (400 MHz,  $\text{CDCl}_3$ )  $\delta$  10.25 (s, 1H), 7.77 (d,  $J$  = 8.3 Hz, 1H), 7.17-7.08 (m, 2H), 3.97-3.86 (m, 4H), 3.15-3.06 (m, 4H).  $^{13}\text{C}$  NMR (100 MHz,  $\text{CDCl}_3$ )  $\delta$  189.81, 155.92, 141.32, 131.96, 126.87, 123.15, 119.32, 66.78, 53.98. HRMS (ESI) calculated for  $\text{C}_{11}\text{H}_{13}\text{NO}_2\text{Cl}$  ( $\text{M}+\text{H}$ ) $^+$ : 226.0630, found: 226.0628.

#### 4-bromo-2-morpholinobenzaldehyde (1ae)

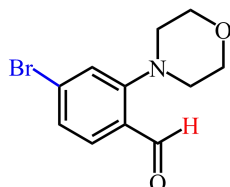

Pale yellow solid. M. p. 90-91 °C.  $^1\text{H}$  NMR (400 MHz,  $\text{CDCl}_3$ )  $\delta$  10.23 (s, 1H), 7.66 (d,  $J$  = 8.2 Hz, 1H), 7.27 (dd,  $J$  = 8.4, 1.5 Hz, 1H), 7.24 (d,  $J$  = 1.6 Hz, 1H), 3.97-3.75 (m, 4H), 3.19-2.93 (m, 4H).  $^{13}\text{C}$  NMR (100 MHz,  $\text{CDCl}_3$ )  $\delta$  189.95, 155.82, 131.90, 130.06, 127.21, 126.08, 122.33, 66.75, 53.98. HRMS (ESI) calculated for  $\text{C}_{11}\text{H}_{13}\text{NO}_2\text{Br}$  ( $\text{M}+\text{H}$ ) $^+$ : 270.0124, found: 270.0122.

#### 5-bromo-2-morpholinobenzaldehyde (1af)

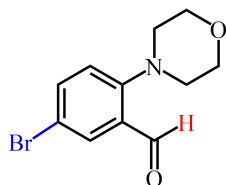

Pale yellow solid. M. p. 73-74 °C.  $^1\text{H}$  NMR (400 MHz,  $\text{CDCl}_3$ )  $\delta$  10.25 (s, 1H), 7.90 (d,  $J$  = 2.5 Hz, 1H), 7.62 (dd,  $J$  = 8.7, 2.5 Hz, 1H), 7.01 (d,  $J$  = 8.7 Hz, 1H), 4.09-3.75 (m, 4H), 3.24-2.85 (m, 4H).  $^{13}\text{C}$  NMR (100 MHz,  $\text{CDCl}_3$ )  $\delta$  189.56, 154.15, 137.62, 132.66, 130.05, 120.94, 116.14, 66.78, 54.12. HRMS (ESI) calculated for  $\text{C}_{11}\text{H}_{13}\text{NO}_2\text{Br}$  ( $\text{M}+\text{H}$ ) $^+$ : 270.0124, found: 270.0127.

#### 4-formyl-3-morpholinobenzonitrile (1ag)



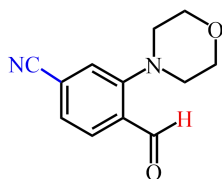

Yellow solid. M. p. 141-142 °C.  $^1\text{H NMR}$  (400 MHz,  $\text{CDCl}_3$ )  $\delta$  10.31 (s, 1H), 7.88 (d,  $J = 7.9$  Hz, 1H), 7.41 (d,  $J = 8.0$  Hz, 1H), 7.39 (s, 1H), 3.99-3.83 (m, 4H), 3.20-3.03 (m, 4H).  $^{13}\text{C NMR}$  (100 MHz,  $\text{CDCl}_3$ )  $\delta$  189.65, 154.86, 131.20, 130.99, 125.82, 122.68, 117.91, 66.65, 53.89. **HRMS** (ESI) calculated for  $\text{C}_{12}\text{H}_{13}\text{N}_2\text{O}_2$  ( $\text{M}+\text{H}$ ) $^+$ : 217.0972, found: 217.0970.

### 3-formyl-4-morpholinobenzonitrile (1ah)

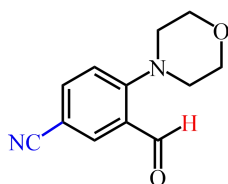

Yellow solid. M. p. 139-140 °C.  $^1\text{H NMR}$  (400 MHz,  $\text{CDCl}_3$ )  $\delta$  10.13 (d,  $J = 3.7$  Hz, 1H), 8.05 (d,  $J = 2.1$  Hz, 1H), 7.74 (dd,  $J = 8.6, 2.1$  Hz, 1H), 7.13 (d,  $J = 8.6$  Hz, 1H), 4.11-3.66 (m, 4H), 3.37-3.03 (m, 4H).  $^{13}\text{C NMR}$  (100 MHz,  $\text{CDCl}_3$ )  $\delta$  188.45, 156.89, 137.61, 136.12, 127.48, 118.98, 118.22, 104.97, 66.57, 53.40. **HRMS** (ESI) calculated for  $\text{C}_{12}\text{H}_{13}\text{N}_2\text{O}_2$  ( $\text{M}+\text{H}$ ) $^+$ : 217.0972, found: 217.0978.

### 5-chloro-2-morpholinobenzaldehyde (1ai)

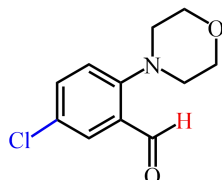

Pale yellow solid. M. p. 82-84 °C.  $^1\text{H NMR}$  (400 MHz,  $\text{CDCl}_3$ )  $\delta$  10.31 (s, 1H), 7.80 (d,  $J = 2.6$  Hz, 1H), 7.51 (dd,  $J = 8.7, 2.6$  Hz, 1H), 7.11 (d,  $J = 8.7$  Hz, 1H), 3.97-3.87 (m, 4H), 3.15-3.03 (m, 4H).  $^{13}\text{C NMR}$  (125 MHz,  $\text{CDCl}_3$ )  $\delta$  189.78, 153.78, 134.78, 129.81, 129.62, 128.90, 120.64, 66.83, 54.22. **HRMS** (ESI) calculated for  $\text{C}_{11}\text{H}_{13}\text{NO}_2\text{Cl}$  ( $\text{M}+\text{H}$ ) $^+$ : 226.0630, found: 226.0626.

### 4-methyl-2-morpholinobenzaldehyde (1aj)

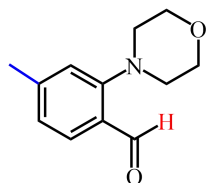

Pale yellow solid. M. p. 52-53 °C.  $^1\text{H NMR}$  (400 MHz,  $\text{CDCl}_3$ )  $\delta$  10.26 (s, 1H), 7.71 (d,  $J = 7.8$  Hz, 1H), 6.95 (d,  $J = 7.9$  Hz, 1H), 6.90 (s, 1H), 3.93-3.85 (m, 4H),

3.11-3.04 (m, 4H), 2.40 (s, 3H).  $^{13}\text{C}$  NMR (125 MHz,  $\text{CDCl}_3$ )  $\delta$  190.70, 155.33, 146.29, 130.65, 126.26, 123.83, 119.36, 66.94, 54.11, 22.14. HRMS (ESI) calculated for  $\text{C}_{12}\text{H}_{16}\text{NO}_2$  ( $\text{M}+\text{H}$ ) $^+$ : 206.1176, found: 206.1180.

#### 5-methyl-2-morpholinobenzaldehyde (1ak)

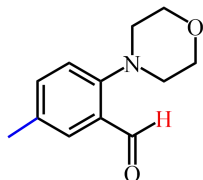

Pale yellow solid. M. p. 76-77 °C.  $^1\text{H}$  NMR (400 MHz,  $\text{CDCl}_3$ )  $\delta$  10.37 (s, 1H), 7.64 (d,  $J = 1.7$  Hz, 1H), 7.37 (dd,  $J = 8.2, 1.9$  Hz, 1H), 7.05 (d,  $J = 8.2$  Hz, 1H), 3.96-3.82 (m, 4H), 3.11-3.00 (m, 4H), 2.35 (s, 3H).  $^{13}\text{C}$  NMR (125 MHz,  $\text{CDCl}_3$ )  $\delta$  191.50, 153.35, 135.90, 132.82, 130.09, 128.67, 119.04, 66.99, 54.34, 20.51. HRMS (ESI) calculated for  $\text{C}_{12}\text{H}_{16}\text{NO}_2$  ( $\text{M}+\text{H}$ ) $^+$ : 206.1176, found: 206.1175.

#### 4-methoxy-2-morpholinobenzaldehyde (1al)

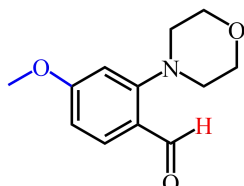

Pale yellow solid. M. p. 104-105 °C.  $^1\text{H}$  NMR (400 MHz,  $\text{CDCl}_3$ )  $\delta$  10.14 (s, 1H), 7.79 (d,  $J = 8.7$  Hz, 1H), 6.66 (dd,  $J = 8.6, 2.3$  Hz, 1H), 6.55 (d,  $J = 2.3$  Hz, 1H), 3.93-3.85 (m, 7H), 3.11-3.04 (m, 4H).  $^{13}\text{C}$  NMR (125 MHz,  $\text{CDCl}_3$ )  $\delta$  189.49, 165.27, 157.23, 133.49, 122.23, 107.85, 104.54, 66.88, 55.54, 53.94. HRMS (ESI) calculated for  $\text{C}_{12}\text{H}_{16}\text{NO}_3$  ( $\text{M}+\text{H}$ ) $^+$ : 222.1125, found: 222.1123.

#### 5-methoxy-2-morpholinobenzaldehyde (1am)

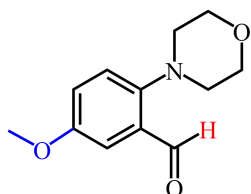

Yellow oil.  $^1\text{H}$  NMR (400 MHz,  $\text{CDCl}_3$ )  $\delta$  10.44 (s, 1H), 7.33 (s, 1H), 7.14 (d,  $J = 1.5$  Hz, 2H), 3.91-3.85 (m, 4H), 3.82 (s, 3H), 3.08-2.94 (m, 4H).  $^{13}\text{C}$  NMR (100 MHz,  $\text{CDCl}_3$ )  $\delta$  191.30, 155.92, 149.85, 130.09, 122.59, 121.18, 111.34, 67.03, 55.65, 54.67. HRMS (ESI) calculated for  $\text{C}_{12}\text{H}_{16}\text{NO}_3$  ( $\text{M}+\text{H}$ ) $^+$ : 222.1125, found: 222.1121.

#### 4, 5-dimethoxy-2-morpholinobenzaldehyde (1an)

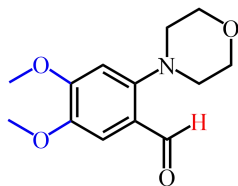

Pale yellow solid. M. p. 94-95 °C.  $^1\text{H NMR}$  (400 MHz,  $\text{CDCl}_3$ )  $\delta$  10.31 (s, 1H), 7.32 (s, 1H), 6.64 (s, 1H), 3.95 (s, 3H), 3.90-3.82 (m, 7H), 3.08-3.00 (m, 4H).  $^{13}\text{C NMR}$  (125 MHz,  $\text{CDCl}_3$ )  $\delta$  189.64, 154.92, 152.05, 145.66, 122.20, 109.96, 102.37, 66.95, 56.09, 56.08, 54.73. **HRMS** (ESI) calculated for  $\text{C}_{13}\text{H}_{18}\text{NO}_4$  ( $\text{M}+\text{H}$ ) $^+$ : 252.1231, found: 252.1235.

### 2-morpholinonicotinaldehyde (1ao)

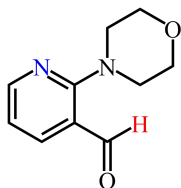

Yellow oil,  $^1\text{H NMR}$  (400 MHz,  $\text{CDCl}_3$ )  $\delta$  10.05 (s, 1H), 8.42 (dd,  $J = 4.7, 2.0$  Hz, 1H), 8.03 (dd,  $J = 7.6, 2.0$  Hz, 1H), 7.09-6.89 (m, 1H), 4.03-3.82 (m, 4H), 3.55-3.37 (m, 4H).  $^{13}\text{C NMR}$  (100 MHz,  $\text{CDCl}_3$ )  $\delta$  189.76, 161.44, 152.68, 141.17, 119.62, 116.29, 66.91, 51.41. **HRMS** (ESI) calculated for  $\text{C}_{10}\text{H}_{13}\text{N}_2\text{O}_2$  ( $\text{M}+\text{H}$ ) $^+$ : 193.0972, found: 193.0968.

### 3-bromo-2-(3,4-dihydroisoquinolin-2(1H)-yl)benzaldehyde (1ap)

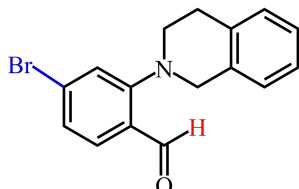

Yellow oil.  $^1\text{H NMR}$  (400 MHz,  $\text{CDCl}_3$ )  $\delta$  10.21 (s, 1H), 7.68 (d,  $J = 8.3$  Hz, 1H), 7.32 (s, 1H), 7.25 (d,  $J = 3.4$  Hz, 1H), 7.23-7.16 (m, 3H), 7.10 (d,  $J = 4.6$  Hz, 1H), 4.31 (s, 2H), 3.45 (t,  $J = 5.8$  Hz, 2H), 3.07 (t,  $J = 5.7$  Hz, 2H).  $^{13}\text{C NMR}$  (100 MHz,  $\text{CDCl}_3$ )  $\delta$  190.15, 155.67, 133.97, 133.49, 131.66, 129.92, 128.99, 127.05, 126.80, 126.39, 126.26, 125.32, 122.19, 54.49, 53.44, 29.07. **HRMS** (ESI) calculated for  $\text{C}_{16}\text{H}_{15}\text{NOBr}$  ( $\text{M}+\text{H}$ ) $^+$ : 316.0332, found: 316.0335.

### 4-(3,4-dihydroisoquinolin-2(1H)-yl)-3-formylbenzonitrile (1aq)

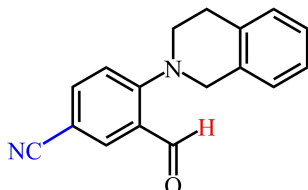

Yellow solid. M. p. 98-99 °C.  $^1\text{H NMR}$  (400 MHz,  $\text{CDCl}_3$ )  $\delta$  10.10 (s, 1H), 8.06 (d,  $J = 2.1$  Hz, 1H), 7.68 (dd,  $J = 8.7, 2.2$  Hz, 1H), 7.25-7.15 (m, 4H), 7.15-7.08 (m, 1H), 4.46 (s, 2H), 3.62 (t,  $J = 5.9$  Hz, 2H), 3.08 (t,  $J = 5.8$  Hz, 2H).  $^{13}\text{C NMR}$  (100 MHz,  $\text{CDCl}_3$ )  $\delta$  188.52, 155.98, 137.17, 136.47, 133.98, 132.94, 128.91, 127.10, 126.58, 126.43, 126.32, 118.58, 118.28, 103.23, 53.75, 52.43, 28.72. **HRMS** (ESI) calculated for  $\text{C}_{17}\text{H}_{15}\text{N}_2\text{O}$  ( $\text{M}+\text{H}$ ) $^+$ : 263.1179, found: 263.1182.

### 2-(3, 4-dihydroisoquinolin-2(1H)-yl)-5-methoxybenzaldehyde (1ar)

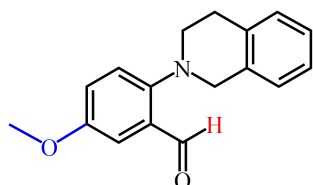

Yellow oil.  $^1\text{H NMR}$  (400 MHz,  $\text{CDCl}_3$ )  $\delta$  10.15 (s, 1H), 7.82 (d,  $J = 9.3$  Hz, 1H), 7.23-7.16 (m, 3H), 7.12-7.06 (m, 1H), 6.65-6.62 (m, 2H), 4.31 (s, 2H), 3.86 (s, 3H), 3.45 (t,  $J = 5.8$  Hz, 2H), 3.07 (d,  $J = 5.8$  Hz, 2H).  $^{13}\text{C NMR}$  (100 MHz,  $\text{CDCl}_3$ )  $\delta$  191.74, 153.33, 135.75, 134.26, 132.23, 129.78, 128.99, 128.68, 126.56, 126.38, 126.05, 119.29, 55.14, 53.67, 29.11, 20.53. **HRMS** (ESI) calculated for  $\text{C}_{17}\text{H}_{18}\text{NO}_2$  ( $\text{M}+\text{H}$ ) $^+$ : 268.1332, found: 268.1328.

### 4-(2-vinylphenyl)morpholine (1ba)

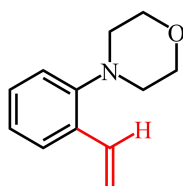

Yellow oil.  $^1\text{H NMR}$  (400 MHz,  $\text{CDCl}_3$ )  $\delta$  7.50 (d,  $J = 7.7$  Hz, 1H), 7.26 (t,  $J = 7.7$  Hz, 1H), 7.14-6.97 (m, 3H), 5.70 (dd,  $J = 17.8, 1.3$  Hz, 1H), 5.25 (dd,  $J = 11.0, 1.3$  Hz, 1H), 3.92-3.77 (m, 4H), 3.01-2.86 (m, 4H).  $^{13}\text{C NMR}$  (125 MHz,  $\text{CDCl}_3$ )  $\delta$  150.41, 134.16, 132.21, 128.60, 126.91, 123.25, 118.39, 113.81, 67.33, 52.59. **HRMS** (ESI) calculated for  $\text{C}_{12}\text{H}_{16}\text{NO}$  ( $\text{M}+\text{H}$ ) $^+$ : 190.1227, found: 190.1230.

### 2-morpholinobenzoic acid (1bb)

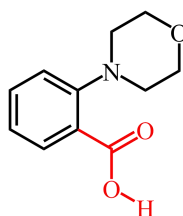

Brown solid. M. p. 156-157 °C.  $^1\text{H NMR}$  (400 MHz,  $\text{CDCl}_3$ )  $\delta$  8.31 (dd,  $J = 7.8, 1.6$  Hz, 1H), 7.70-7.57 (m, 1H), 7.50-7.39 (m, 2H), 4.51 (s, 1H), 3.96 (s, 4H), 3.09 (s, 4H).  $^{13}\text{C NMR}$  (100 MHz,  $\text{CDCl}_3$ )  $\delta$  166.79, 150.17, 134.13, 132.56, 127.89, 125.10,

122.52, 66.91, 53.55. **HRMS** (ESI) calculated for  $C_{11}H_{14}NO_3$  ( $M+H$ )<sup>+</sup>: 208.0968, found: 208.0965.

### 1-(2-morpholinophenyl)propan-1-one (1bc)

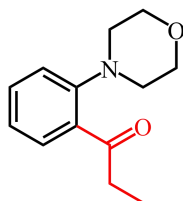

Yellow oil. **<sup>1</sup>H NMR** (400 MHz,  $CDCl_3$ )  $\delta$  7.39 (td,  $J = 8.1, 1.6$  Hz, 1H), 7.31 (dd,  $J = 7.8, 1.6$  Hz, 1H), 7.11-7.03 (m, 2H), 3.84-3.76 (m, 4H), 3.05 (q,  $J = 7.3$  Hz, 2H), 2.99-2.92 (m, 4H), 1.16 (t,  $J = 7.4$  Hz, 3H). **<sup>13</sup>C NMR** (125 MHz,  $CDCl_3$ )  $\delta$  208.56, 150.45, 136.02, 131.41, 128.62, 123.16, 118.68, 67.06, 53.25, 35.13, 8.70. **HRMS** (ESI) calculated for  $C_{13}H_{18}NO_2$  ( $M+H$ )<sup>+</sup>: 220.1332, found: 220.1337.

### methyl 2-morpholinobenzoate (1bd)

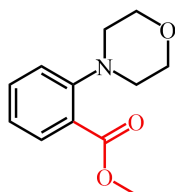

Brown oil. **<sup>1</sup>H NMR** (400 MHz,  $CDCl_3$ )  $\delta$  7.76 (dd,  $J = 7.7, 1.6$  Hz, 1H), 7.49-7.39 (m, 1H), 7.10-6.99 (m, 2H), 3.89 (s, 3H), 3.88-3.83 (m, 4H), 3.10-3.02 (m, 4H). **<sup>13</sup>C NMR** (125 MHz,  $CDCl_3$ )  $\delta$  168.18, 152.20, 132.84, 131.72, 124.26, 121.88, 118.82, 67.12, 52.88, 52.05. **HRMS** (ESI) calculated for  $C_{12}H_{16}NO_3$  ( $M+H$ )<sup>+</sup>: 222.1123, found: 222.1125.

### 2-(morpholinomethyl)benzaldehyde (1bg)

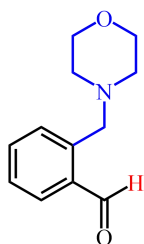

Yellow oil, **<sup>1</sup>H NMR** (400 MHz,  $CDCl_3$ )  $\delta$  10.43 (s, 1H), 7.87 (d,  $J = 7.6$  Hz, 1H), 7.51 (td,  $J = 7.4, 1.4$  Hz, 1H), 7.41 (dd,  $J = 12.4, 7.5$  Hz, 2H), 3.82 (s, 2H), 3.69-3.61 (m, 4H), 2.51-2.38 (m, 4H). **<sup>13</sup>C NMR** (125 MHz,  $CDCl_3$ )  $\delta$  192.07, 140.40, 135.05, 133.20, 130.60, 129.41, 127.93, 66.88, 60.09, 53.29. **HRMS** (ESI) calculated for  $C_{12}H_{16}NO_2$  ( $M+H$ )<sup>+</sup>: 206.1176, found: 206.1180.

### 2-((benzyl(phenyl)amino)methyl)benzaldehyde (1bh)

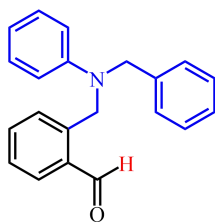

White solid. M. p. 113-114 °C.  $^1\text{H NMR}$  (400 MHz,  $\text{CDCl}_3$ )  $\delta$  10.17 (s, 1H), 7.88 (dd,  $J = 7.4, 1.4$  Hz, 1H), 7.58–7.44 (m, 2H), 7.41 (d,  $J = 7.6$  Hz, 1H), 7.36-7.29 (m, 2H), 7.26 (dd,  $J = 6.9, 4.8$  Hz, 3H), 7.16 (dt,  $J = 8.7, 4.8$  Hz, 2H), 6.70 (t,  $J = 7.3$  Hz, 1H), 6.63 (d,  $J = 8.0$  Hz, 2H), 5.10 (s, 2H), 4.66 (s, 2H).  $^{13}\text{C NMR}$  (100 MHz,  $\text{CDCl}_3$ )  $\delta$  193.57, 148.73, 141.25, 138.28, 135.35, 134.06, 133.83, 129.31, 128.74, 127.39, 127.24, 126.97, 126.59, 116.86, 112.29, 54.58, 52.98. **HRMS** (ESI) calculated for  $\text{C}_{11}\text{H}_{20}\text{NO}$  ( $\text{M}+\text{H}$ ) $^+$ : 302.1540, found: 302.1545.

### 2-(cyclohex-2-en-1-ylamino)benzaldehyde (1bi)

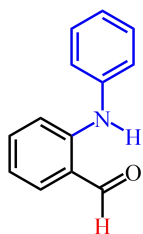

Yellow oil.  $^1\text{H NMR}$  (400 MHz,  $\text{CDCl}_3$ )  $\delta$  9.80 (s, 1H), 8.36 (s, 1H), 7.45 (dd,  $J = 7.7, 1.6$  Hz, 1H), 7.36 (ddd,  $J = 8.6, 7.1, 1.6$  Hz, 1H), 6.75 (d,  $J = 8.6$  Hz, 1H), 6.66 (t,  $J = 7.4$  Hz, 1H), 5.89 (dtd,  $J = 9.3, 3.6, 1.8$  Hz, 1H), 5.74 (ddd,  $J = 10.0, 5.1, 2.2$  Hz, 1H), 4.12 (s, 1H), 2.16-2.00 (m, 2H), 1.99-1.89 (m, 1H), 1.82-1.58 (m, 3H).  $^{13}\text{C NMR}$  (100 MHz,  $\text{CDCl}_3$ )  $\delta$  193.79, 149.80, 137.00, 135.74, 130.78, 127.34, 118.48, 114.63, 111.14, 46.90, 28.74, 25.03, 19.67. **HRMS** (ESI) calculated for  $\text{C}_{13}\text{H}_{16}\text{NO}$  ( $\text{M}+\text{H}$ ) $^+$ : 202.1227, found: 202.1225.

### 2-(benzylamino)benzaldehyde (1bj)

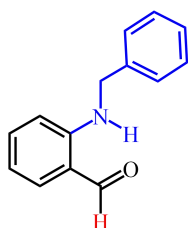

Pale yellow solid. M. p. 52-53 °C.  $^1\text{H NMR}$  (400 MHz,  $\text{CDCl}_3$ )  $\delta$  9.85 (s, 1H), 8.74 (s, 1H), 7.48 (dd,  $J = 7.7, 1.5$  Hz, 1H), 7.33-7.29 (m, 5H), 7.26 (dd,  $J = 8.5, 4.2$  Hz, 1H), 6.69 (t,  $J = 7.4$  Hz, 1H), 6.63 (d,  $J = 8.5$  Hz, 1H), 4.47 (d,  $J = 3.9$  Hz, 2H).  $^{13}\text{C NMR}$  (125 MHz,  $\text{CDCl}_3$ )  $\delta$  194.15, 150.60, 138.31, 136.71, 135.87, 128.77, 127.33, 127.03, 118.71, 115.33, 111.37, 46.62. **HRMS** (ESI) calculated for  $\text{C}_{14}\text{H}_{14}\text{NO}$  ( $\text{M}+\text{H}$ ) $^+$ : 212.1070, found: 212.1072.

### 2-vinylbenzaldehyde (1bk)

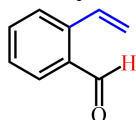

Yellow oil. <sup>1</sup>H NMR (400 MHz, CDCl<sub>3</sub>) δ 10.28 (s, 1H), 7.82 (d, J = 7.5 Hz, 1H), 7.60-7.49 (m, 3H), 7.45-7.41 (m, 1H), 5.70 (dd, J = 17.4 Hz, J = 1.0, 1H), 5.51 (dd, J = 11.0 Hz, J = 0.9, 1H). <sup>13</sup>C NMR (100 MHz, CDCl<sub>3</sub>) δ 192.42, 140.50, 133.81, 133.37, 132.87, 131.25, 127.93, 127.44, 119.42. HRMS (ESI) calculated for C<sub>9</sub>H<sub>9</sub>O (M+H)<sup>+</sup>: 133.0648, found: 133.0645.

### 2-(benzyloxy)benzaldehyde (1bl)

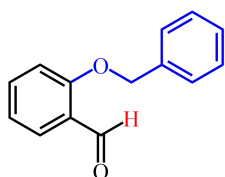

White solid. M. p. 48-49 °C. <sup>1</sup>H NMR (400 MHz, CDCl<sub>3</sub>) δ 10.59 (s, 1H), 7.89 (dd, J = 7.6, 1.8 Hz, 1H), 7.60-7.52 (m, 1H), 7.50-7.34 (m, 5H), 7.07 (t, J = 8.3 Hz, 2H), 5.22 (s, 2H). <sup>13</sup>C NMR (125 MHz, CDCl<sub>3</sub>) δ 189.80, 161.08, 136.10, 135.93, 128.76, 128.49, 128.31, 127.32, 125.22, 121.05, 113.05, 70.50. HRMS (ESI) calculated for C<sub>14</sub>H<sub>13</sub>O<sub>2</sub> (M+H)<sup>+</sup>: 213.0910, found: 213.0908.

### 2-ethoxybenzaldehyde (1bm)

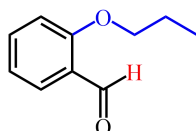

Yellow oil. <sup>1</sup>H NMR (400 MHz, CDCl<sub>3</sub>) δ 10.54 (s, 1H), 7.84 (dd, J = 7.7, 1.8 Hz, 1H), 7.53 (ddd, J = 9.0, 7.4, 1.8 Hz, 1H), 7.03-6.97 (m, 2H), 4.05 (t, J = 6.4 Hz, 2H), 1.95-1.82 (m, 2H), 1.09 (t, J = 7.4 Hz, 3H). <sup>13</sup>C NMR (125 MHz, CDCl<sub>3</sub>) δ 189.78, 161.09, 136.12, 135.96, 128.77, 128.47, 128.31, 127.33, 125.22, 121.05, 113.09, 70.50. HRMS (ESI) calculated for C<sub>10</sub>H<sub>13</sub>O<sub>2</sub> (M+H)<sup>+</sup>: 165.0910, found: 165.0915.

### 2-(2-methoxyethoxy)benzaldehyde (1bn)

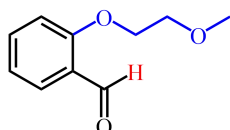

Yellow oil. <sup>1</sup>H NMR (400 MHz, CDCl<sub>3</sub>) δ 10.53 (s, 1H), 7.83 (dd, J = 7.7, 1.8 Hz, 1H), 7.53 (ddd, J = 8.4, 7.3, 1.9 Hz, 1H), 7.01 (dd, J = 16.5, 8.1 Hz, 2H), 4.25-4.23 (m, 2H), 3.87-3.75 (m, 2H), 3.45 (s, 3H). <sup>13</sup>C NMR (125 MHz, CDCl<sub>3</sub>) δ 189.79, 161.25, 135.89, 128.25, 125.09, 120.99, 112.81, 70.81, 68.17, 59.30. HRMS (ESI) calculated for C<sub>10</sub>H<sub>13</sub>O<sub>3</sub> (M+H)<sup>+</sup>: 181.0859, found: 181.0855.

#### 4-phenylmorpholine (2a)

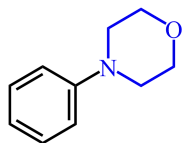

Colorless oil. Yield: 75% (36.7 mg). **<sup>1</sup>H NMR** (400 MHz, CDCl<sub>3</sub>) δ 7.28 (t, J = 8.0 Hz, 2H), 6.93-6.87(m, 3H), 3.96-3.76 (m, 4H), 3.22-3.07 (m, 4H). **<sup>13</sup>C NMR** (100 MHz, CDCl<sub>3</sub>) δ 151.26, 129.23, 120.15, 115.79, 66.96, 49.44. **HRMS** (ESI) calculated for C<sub>10</sub>H<sub>14</sub>NO (M+H)<sup>+</sup>: 164.1070, found: 164.1073.

#### 2, 6-dimethyl-4-phenylmorpholine (2b)

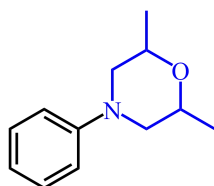

Colorless oil. Yield: 64% (36.7 mg). **<sup>1</sup>H NMR** (400 MHz, CDCl<sub>3</sub>) δ 7.32-7.28 (m, 2H), 6.94 (d, J = 8.0 Hz, 2H), 6.89 (t, J = 7.3 Hz, 1H), 3.92-3.77 (m, 2H), 3.48 (dd, J = 12.4, 1.8 Hz, 2H), 2.45 (dd, J = 11.8, 10.6 Hz, 2H), 1.29 (d, J = 6.3 Hz, 6H). **<sup>13</sup>C NMR** (100 MHz, CDCl<sub>3</sub>) δ 150.99, 129.20, 119.82, 115.82, 71.68, 54.89, 19.11. **HRMS** (ESI) calculated for C<sub>12</sub>H<sub>18</sub>NO (M+H)<sup>+</sup>: 192.1383, found: 192.1387.

#### 1-phenylpiperidine (2c)

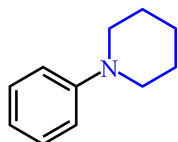

Yellow oil. Yield: 63% (30.4 mg). **<sup>1</sup>H NMR** (400 MHz, CDCl<sub>3</sub>) δ 7.25 (t, J = 7.8 Hz, 2H), 6.95 (d, J = 8.2 Hz, 2H), 6.82 (t, J = 7.2 Hz, 1H), 3.26-3.06 (m, 4H), 1.78-1.66 (m, 4H), 1.63-1.51 (m, 2H). **<sup>13</sup>C NMR** (125 MHz, CDCl<sub>3</sub>) δ 129.05, 116.70, 100.00, 50.89, 25.81, 24.27. **HRMS** (ESI) calculated for C<sub>11</sub>H<sub>16</sub>N (M+H)<sup>+</sup>: 162.1277, found: 162.1270.

#### 2-methyl-1-phenylpiperidine (2d)

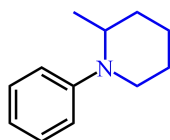

Yellow oil. Yield: 71% (37.3 mg). **<sup>1</sup>H NMR** (400 MHz, CDCl<sub>3</sub>) δ 7.29 (t, J = 7.9 Hz, 2H), 7.02 (d, J = 7.2 Hz, 2H), 6.89 (t, J = 7.2 Hz, 1H), 3.90 (dd, J = 10.5, 4.3 Hz, 1H), 3.24 (dt, J = 11.7, 4.3 Hz, 1H), 3.03 (t, J = 9.3 Hz, 1H), 2.00-1.80 (m, 2H), 1.73-1.58 (m, 4H), 1.04 (d, J = 6.6 Hz, 3H). **<sup>13</sup>C NMR** (125 MHz, CDCl<sub>3</sub>) δ 151.45, 129.00,



119.27, 117.73, 51.50, 45.18, 31.85, 26.15, 19.86, 13.96. **HRMS** (ESI) calculated for  $C_{12}H_{18}N$  ( $M+H$ )<sup>+</sup>: 176.1434, found: 176.1435.

### 1-phenylazepane (2e)

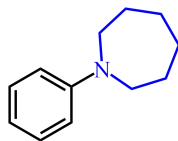

Colorless oil. Yield: 60% (31.5 mg). **<sup>1</sup>H NMR** (400 MHz,  $CDCl_3$ )  $\delta$  7.27-7.18 (m, 2H), 6.72 (d,  $J$  = 8.3 Hz, 2H), 6.66 (t,  $J$  = 7.2 Hz, 1H), 3.53-3.35 (m, 4H), 1.82 (s, 4H), 1.61-1.52 (m, 4H). **<sup>13</sup>C NMR** (126 MHz,  $CDCl_3$ )  $\delta$  148.90, 129.27, 115.12, 111.16, 49.07, 27.81, 27.19. **HRMS** (ESI) calculated for  $C_{12}H_{18}N$  ( $M+H$ )<sup>+</sup>: 176.1434, found: 176.1432.

### 1, 4-diphenylpiperazine (2f)

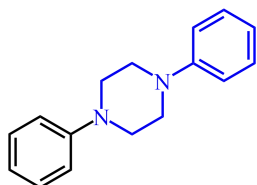

White solid. M. p. 163-164 °C. Yield: 55% (39.3 mg). **<sup>1</sup>H NMR** (400 MHz,  $CDCl_3$ )  $\delta$  7.39-7.30 (m, 4H), 7.03 (d,  $J$  = 8.0 Hz, 4H), 6.94 (t,  $J$  = 7.3 Hz, 2H), 3.39 (s, 8H). **<sup>13</sup>C NMR** (125 MHz,  $CDCl_3$ )  $\delta$  151.20, 129.23, 120.17, 116.42, 49.48. **HRMS** (ESI) calculated for  $C_{16}H_{19}N_2$  ( $M+H$ )<sup>+</sup>: 239.1543, found: 239.1541.

### *N, N*-dimethylaniline (2g)

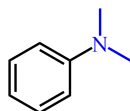

Colorless oil. Yield: 48% (17.4 mg). **<sup>1</sup>H NMR** (400 MHz,  $CDCl_3$ )  $\delta$  7.27-7.18 (m, 2H), 6.77-6.68 (m, 3H), 2.90 (s, 6H). **<sup>13</sup>C NMR** (125 MHz,  $CDCl_3$ )  $\delta$  150.81, 129.21, 116.80, 112.82, 40.72. **HRMS** (ESI) calculated for  $C_8H_{12}N$  ( $M+H$ )<sup>+</sup>: 122.0964, found: 122.0990.

### *N*-allyl-*N*-methylaniline (2h)

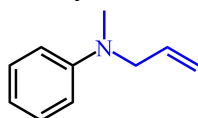

Yellow oil. Yield: 46% (20.3 mg). **<sup>1</sup>H NMR** (400 MHz,  $CDCl_3$ )  $\delta$  7.22 (dd,  $J$  = 8.5, 7.1 Hz, 2H), 6.74-6.68 (m, 3H), 5.89-5.80 (m, 1H), 5.21-5.08 (m, 2H), 3.91 (d,  $J$  = 5.1 Hz, 2H), 2.93 (s, 3H). **<sup>13</sup>C NMR** (100 MHz,  $CDCl_3$ )  $\delta$  149.48, 133.81, 129.13, 116.49, 116.21, 112.53, 55.33, 38.04. **HRMS** (ESI) calculated for  $C_{10}H_{14}N$  ( $M+H$ )<sup>+</sup>: 148.1121, found: 148.1120.

### *N*-(2-methoxyethyl)-*N*-methylaniline (2i)

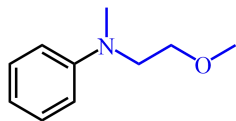

Colorless oil. Yield: 44% (21.8 mg).  $^1\text{H NMR}$  (400 MHz,  $\text{CDCl}_3$ )  $\delta$  7.34-7.19 (m, 2H), 6.76 (d,  $J = 8.5$  Hz, 2H), 3.61-3.58 (m, 2H), 3.56-3.51 (m, 2H), 3.39 (s, 3H), 3.01 (s, 3H).  $^{13}\text{C NMR}$  (125 MHz,  $\text{CDCl}_3$ )  $\delta$  149.30, 129.19, 116.35, 112.22, 70.19, 59.05, 52.49, 38.94. **HRMS** (ESI) calculated for  $\text{C}_{10}\text{H}_{16}\text{NO}$  ( $\text{M}+\text{H}$ ) $^+$ : 166.1227, found: 166.1225.

### *N*-benzyl-*N*-methylaniline (2j)

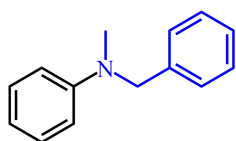

Colorless oil. Yield: 56% (33.1 mg).  $^1\text{H NMR}$  (400 MHz,  $\text{CDCl}_3$ )  $\delta$  7.34-7.27 (m, 2H), 7.32-7.19 (m, 5H), 6.75 (d,  $J = 8.1$  Hz, 2H), 6.71 (t,  $J = 7.3$  Hz, 1H), 4.53 (s, 2H), 3.01 (s, 3H).  $^{13}\text{C NMR}$  (125 MHz,  $\text{CDCl}_3$ )  $\delta$  149.75, 139.03, 129.21, 128.59, 126.89, 126.78, 116.58, 112.41, 56.68, 38.55. **HRMS** (ESI) calculated for  $\text{C}_{14}\text{H}_{16}\text{N}$  ( $\text{M}+\text{H}$ ) $^+$ : 198.1277, found : 198.1276.

### *N*-(4-methoxybenzyl)-*N*-methylaniline (2k)

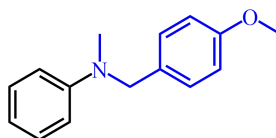

Colorless oil. Yield: 50% (34.1 mg).  $^1\text{H NMR}$  (400 MHz,  $\text{CDCl}_3$ )  $\delta$  7.24-7.18 (m, 2H), 7.14 (d,  $J = 8.6$  Hz, 2H), 6.84 (d,  $J = 8.6$  Hz, 2H), 6.76 (s, 2H), 6.70 (t,  $J = 7.3$  Hz, 1H), 4.45 (s, 2H), 3.77 (s, 3H), 2.96 (s, 3H).  $^{13}\text{C NMR}$  (100 MHz,  $\text{CDCl}_3$ )  $\delta$  158.64, 149.86, 130.92, 129.20, 128.02, 116.59, 113.99, 112.57, 56.10, 55.31, 38.34. **HRMS** (ESI) calculated for  $\text{C}_{15}\text{H}_{18}\text{NO}$  ( $\text{M}+\text{H}$ ) $^+$ : 228.1383, found: 228.1385.

### 4-((methyl(phenyl)amino)methyl)benzonitrile (2l)

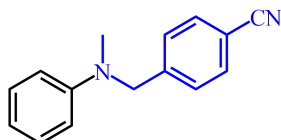

Yellow oil. Yield: 55% (36.7 mg).  $^1\text{H NMR}$  (400 MHz,  $\text{CDCl}_3$ )  $\delta$  7.63 (d,  $J = 8.3$  Hz, 2H), 7.38 (d,  $J = 8.0$  Hz, 2H), 7.32-7.22 (m, 2H), 6.80 (t,  $J = 7.3$  Hz, 1H), 6.75 (d,  $J = 8.1$  Hz, 2H), 4.61 (s, 2H), 3.08 (s, 3H).  $^{13}\text{C NMR}$  (100 MHz,  $\text{CDCl}_3$ )  $\delta$  149.22, 145.07, 132.50, 129.38, 127.42, 118.99, 117.26, 112.46, 110.80, 56.67, 38.92. **HRMS** (ESI) calculated for  $\text{C}_{15}\text{H}_{15}\text{N}_2$  ( $\text{M}+\text{H}$ ) $^+$ : 223.1230, found: 223.1233.

### *N*-benzyl-*N*-ethylaniline (2m)

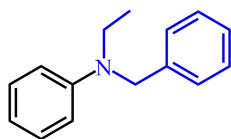

Colorless oil. Yield: 58% (36.7 mg).  $^1\text{H NMR}$  (400 MHz,  $\text{CDCl}_3$ )  $\delta$  7.46-7.33 (m, 5H), 7.32-7.22 (m, 2H), 6.82-6.76 (m, 3H), 4.62 (s, 2H), 3.58 (q,  $J = 7.0$  Hz, 2H), 1.31 (t,  $J = 7.0$  Hz, 3H).  $^{13}\text{C NMR}$  (100 MHz,  $\text{CDCl}_3$ )  $\delta$  148.51, 139.31, 129.26, 128.57, 126.77, 126.58, 116.04, 112.17, 53.93, 45.16, 12.15. **HRMS** (ESI) calculated for  $\text{C}_{15}\text{H}_{18}\text{N}$  ( $\text{M}+\text{H}$ ) $^+$ : 212.1434, found: 212.1430.

### *N*-benzyl-*N*-butylaniline (2n)

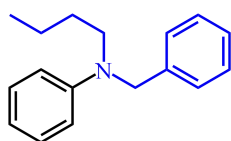

Colorless oil. Yield: 53% (38.0 mg).  $^1\text{H NMR}$  (400 MHz,  $\text{CDCl}_3$ )  $\delta$  7.37-7.30 (m, 2H), 7.28-7.25 (m, 3H), 7.23-7.19 (m, 2H), 6.72-6.67 (m, 3H), 4.57 (s, 2H), 3.54-3.33 (m, 2H), 1.72-1.65 (m, 2H), 1.44-1.35 (m, 2H), 0.98 (t,  $J = 7.4$  Hz, 3H).  $^{13}\text{C NMR}$  (125 MHz,  $\text{CDCl}_3$ )  $\delta$  148.66, 139.22, 129.23, 128.58, 126.75, 126.57, 115.95, 112.13, 54.51, 51.11, 29.34, 20.42, 14.06. **HRMS** (ESI) calculated for  $\text{C}_{17}\text{H}_{22}\text{N}$  ( $\text{M}+\text{H}$ ) $^+$ : 240.1747, found: 240.1743.

### *N,N*-dibenzylaniline (2o)

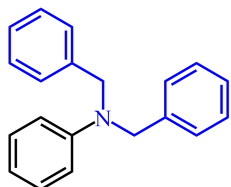

Colorless oil. Yield: 61% (49.9 mg).  $^1\text{H NMR}$  (400 MHz,  $\text{CDCl}_3$ )  $\delta$  7.35-7.28 (m, 4H), 7.28-7.21 (m, 6H), 7.16 (t,  $J = 8.0$  Hz, 2H), 6.74 (d,  $J = 8.2$  Hz, 2H), 6.70 (t,  $J = 7.3$  Hz, 1H), 4.65 (s, 4H).  $^{13}\text{C NMR}$  (125 MHz,  $\text{CDCl}_3$ )  $\delta$  149.19, 138.62, 129.22, 128.64, 126.88, 126.66, 116.72, 112.47, 54.20. **HRMS** (ESI) calculated for  $\text{C}_{20}\text{H}_{20}\text{N}$  ( $\text{M}+\text{H}$ ) $^+$ : 274.1590, found: 274.1595.

### 2-phenyl-1, 2, 3, 4-tetrahydroisoquinoline (2p)

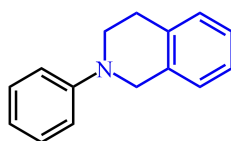

Colorless oil. Yield: 60% (37.6 mg).  $^1\text{H NMR}$  (400 MHz,  $\text{CDCl}_3$ )  $\delta$  7.29 (dd,  $J = 8.8$ , 7.3 Hz, 2H), 7.20-7.13 (m, 4H), 6.98 (d,  $J = 7.9$  Hz, 2H), 6.82 (t,  $J = 7.3$  Hz, 1H), 4.41

(s, 2H), 3.56 (t,  $J = 5.9$  Hz, 2H), 2.99 (d,  $J = 5.8$  Hz, 2H).  $^{13}\text{C}$  NMR (125 MHz,  $\text{CDCl}_3$ )  $\delta$  150.58, 134.90, 134.49, 129.22, 128.54, 126.56, 126.35, 126.04, 118.68, 115.16, 50.76, 46.54, 29.14. HRMS (ESI) calculated for  $\text{C}_{15}\text{H}_{16}\text{N}$  ( $\text{M}+\text{H}$ ) $^+$ : 210.1277, found: 210.1275.

#### 4-(3-fluorophenyl)morpholine (2aa)

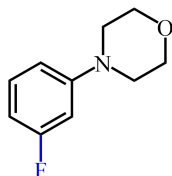

Yellow oil. Yield: 95% (51.6 mg).  $^1\text{H}$  NMR (400 MHz,  $\text{CDCl}_3$ )  $\delta$  7.23 (dd,  $J = 15.2, 8.1$  Hz, 1H), 6.69 (dd,  $J = 8.3, 2.0$  Hz, 1H), 6.64-6.54 (m, 2H), 3.97-3.73 (m, 4H), 3.26-3.03 (m, 4H).  $^{13}\text{C}$  NMR (125 MHz,  $\text{CDCl}_3$ )  $\delta$  163.88 (d,  $^1J_{\text{CF}} = 241.9$  Hz), 152.97 (d,  $^3J_{\text{CF}} = 9.5$  Hz), 130.22 (d,  $^3J_{\text{CF}} = 9.8$  Hz), 110.82 (d,  $^4J_{\text{CF}} = 2.3$  Hz), 106.27 (d,  $^2J_{\text{CF}} = 21.3$  Hz), 102.44 (d,  $^2J_{\text{CF}} = 25.0$  Hz), 66.73, 48.85. HRMS (ESI) calculated for  $\text{C}_{10}\text{H}_{13}\text{NOF}$  ( $\text{M}+\text{H}$ ) $^+$ : 182.0976, found: 182.0979.

#### 4-(2-chlorophenyl)morpholine (2ab)

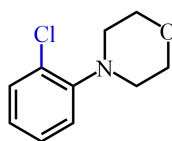

Yellow oil. Yield: 91% (53.8 mg).  $^1\text{H}$  NMR (400 MHz,  $\text{CDCl}_3$ )  $\delta$  7.39 (dd,  $J = 7.9, 1.5$  Hz, 1H), 7.30-7.22 (m, 1H), 7.06 (dd,  $J = 8.1, 1.5$  Hz, 1H), 7.01 (td,  $J = 7.7, 1.5$  Hz, 1H), 4.02-3.82 (m, 4H), 3.19-3.00 (m, 4H).  $^{13}\text{C}$  NMR (125 MHz,  $\text{CDCl}_3$ )  $\delta$  149.04, 130.76, 128.81, 127.68, 123.95, 120.28, 67.18, 51.69. HRMS (ESI) calculated for  $\text{C}_{10}\text{H}_{13}\text{ClNO}$  ( $\text{M}+\text{H}$ ) $^+$ : 198.0680, found: 198.0681.

#### 4-(3-chlorophenyl)morpholine (2ac)

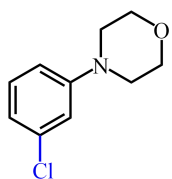

Yellow oil. Yield: 90% (53.2 mg).  $^1\text{H}$  NMR (400 MHz,  $\text{CDCl}_3$ )  $\delta$  7.20 (t,  $J = 8.1$  Hz, 1H), 6.89 (t,  $J = 2.1$  Hz, 1H), 6.88-6.84 (m, 1H), 6.80 (dd,  $J = 8.4, 2.3$  Hz, 1H), 3.96-3.77 (m, 4H), 3.24-3.06 (m, 4H).  $^{13}\text{C}$  NMR (100 MHz,  $\text{CDCl}_3$ )  $\delta$  152.36, 135.06, 130.12, 119.71, 115.53, 113.62, 66.74, 48.89. HRMS (ESI) calculated for  $\text{C}_{10}\text{H}_{13}\text{NOCl}$  ( $\text{M}+\text{H}$ ) $^+$ : 198.0680, found: 198.0677.

#### 4-(3-chlorophenyl)morpholine (2ad)

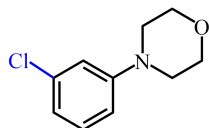

Yellow oil. Yield: 76% (44.9 mg).  $^1\text{H NMR}$  (400 MHz,  $\text{CDCl}_3$ )  $\delta$  7.20 (t,  $J = 8.1$  Hz, 1H), 6.91-6.83 (m, 2H), 6.80 (dd,  $J = 8.4, 2.3$  Hz, 1H), 3.93-3.81 (m, 4H), 3.22-3.11 (m, 4H).  $^{13}\text{C NMR}$  (125 MHz,  $\text{CDCl}_3$ )  $\delta$  152.36, 135.06, 130.11, 119.71, 115.53, 113.61, 66.75, 48.89. **HRMS** (ESI) calculated for  $\text{C}_{10}\text{H}_{13}\text{ClNO}$  ( $\text{M}+\text{H}$ ) $^+$ : 198.0680, found: 198.0685.

#### 4-(3-bromophenyl)morpholine (2ae)

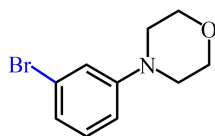

Colorless oil. Yield: 88% (63.8 mg).  $^1\text{H NMR}$  (500 MHz,  $\text{CDCl}_3$ )  $\delta$  7.11 (t,  $J = 8.1$  Hz, 1H), 7.02 (s, 1H), 6.98 (d,  $J = 7.8$  Hz, 1H), 6.81 (d,  $J = 8.3$  Hz, 1H), 3.89-3.79 (m, 4H), 3.19-3.10 (m, 4H).  $^{13}\text{C NMR}$  (125 MHz,  $\text{CDCl}_3$ )  $\delta$  152.52, 130.41, 123.33, 122.64, 118.44, 114.10, 66.75, 48.89. **HRMS** (ESI) calculated for  $\text{C}_{10}\text{H}_{13}\text{NOBr}$  ( $\text{M}+\text{H}$ ) $^+$ : 242.0175, found: 242.0173.

#### 4-(4-bromophenyl)morpholine (2af)

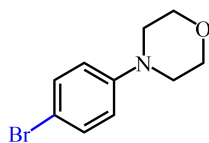

White solid. M. p. 114-115 °C. Yield: 79% (57.3 mg).  $^1\text{H NMR}$  (400 MHz,  $\text{CDCl}_3$ )  $\delta$  7.43-7.28 (m, 2H), 6.78 (d,  $J = 8.9$  Hz, 2H), 4.05-3.68 (m, 4H), 3.31-2.95 (m, 4H).  $^{13}\text{C NMR}$  (100 MHz,  $\text{CDCl}_3$ )  $\delta$  150.25, 131.97, 117.35, 112.27, 66.75, 49.19. **HRMS** (ESI) calculated for  $\text{C}_{10}\text{H}_{13}\text{NOBr}$  ( $\text{M}+\text{H}$ ) $^+$ : 242.0175, found: 242.0170.

#### 3-morpholinobenzonitrile (2ag)

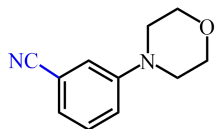

Yellow solid. M. p. 101-102 °C. Yield: 81% (45.7 mg).  $^1\text{H NMR}$  (400 MHz,  $\text{CDCl}_3$ )  $\delta$  7.38-7.32 (m, 1H), 7.15-7.12 (m, 3H), 3.91-3.84 (m, 4H), 3.24-3.16 (m, 4H).  $^{13}\text{C NMR}$  (125 MHz,  $\text{CDCl}_3$ )  $\delta$  151.29, 129.98, 123.03, 119.65, 119.26, 118.21, 113.11, 66.58, 48.50. **HRMS** (ESI) calculated for  $\text{C}_{11}\text{H}_{13}\text{N}_2\text{O}$  ( $\text{M}+\text{H}$ ) $^+$ : 189.1023, found: 189.1024.

#### 4-morpholinobenzonitrile (2ah)

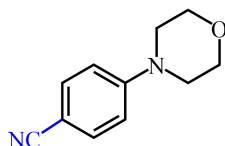

White solid. M. p. 74-75 °C. Yield: 89% (50.2 mg).  $^1\text{H NMR}$  (400 MHz,  $\text{CDCl}_3$ )  $\delta$  7.51 (d,  $J = 9.1$  Hz, 2H), 6.86 (d,  $J = 9.1$  Hz, 2H), 3.94-3.69 (m, 4H), 3.32-3.12 (m, 4H).  $^{13}\text{C NMR}$  (100 MHz,  $\text{CDCl}_3$ )  $\delta$  153.52, 133.51, 119.89, 114.08, 100.87, 66.45, 47.29. **HRMS** (ESI) calculated for  $\text{C}_{11}\text{H}_{13}\text{N}_2\text{O}$  ( $\text{M}+\text{H}$ ) $^+$ : 189.1023, found: 189.1020.

#### 4-(4-chlorophenyl)morpholine (2ai)

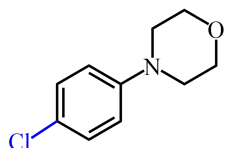

White solid. M. p. 70-71 °C. Yield: 65% (38.4 mg).  $^1\text{H NMR}$  (400 MHz,  $\text{CDCl}_3$ )  $\delta$  7.24 (d,  $J = 9.0$  Hz, 2H), 6.85 (d,  $J = 9.0$  Hz, 2H), 3.94-3.80 (m, 4H), 3.18-3.09 (m, 4H).  $^{13}\text{C NMR}$  (125 MHz,  $\text{CDCl}_3$ )  $\delta$  149.91, 129.05, 124.92, 116.92, 66.80, 49.35. **HRMS** (ESI) calculated for  $\text{C}_{10}\text{H}_{13}\text{NOCl}$  ( $\text{M}+\text{H}$ ) $^+$ : 198.0680, found: 198.0686.

#### 4-(m-tolyl)morpholine (2aj)

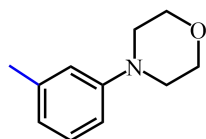

Colorless oil. Yield: 53% (28.1 mg). 138-139 °C.  $^1\text{H NMR}$  (400 MHz,  $\text{CDCl}_3$ )  $\delta$  7.20 (t,  $J = 7.7$  Hz, 1H), 6.83-6.73 (m, 3H), 3.96-3.83 (m, 4H), 3.23-3.13 (m, 4H), 2.35 (s, 3H).  $^{13}\text{C NMR}$  (125 MHz,  $\text{CDCl}_3$ )  $\delta$  139.00, 129.09, 121.34, 116.77, 113.07, 66.89, 49.70, 21.78. **HRMS** (ESI) calculated for  $\text{C}_{11}\text{H}_{16}\text{NO}$  ( $\text{M}+\text{H}$ ) $^+$ : 178.1227, found: 178.1225.

#### 4-(p-tolyl)morpholine (2ak)

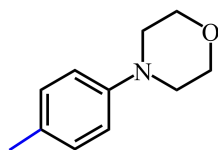

Colorless oil. Yield: 47% (25.0 mg).  $^1\text{H NMR}$  (400 MHz,  $\text{CDCl}_3$ )  $\delta$  7.09 (d,  $J = 8.3$  Hz, 2H), 6.83 (d,  $J = 8.3$  Hz, 2H), 4.20-3.78 (m, 4H), 3.38-2.96 (m, 4H), 2.27 (s, 3H).  $^{13}\text{C NMR}$  (100MHz,  $\text{CDCl}_3$ )  $\delta$  149.18, 129.73, 129.65, 116.09, 66.99, 49.98, 20.43. **HRMS** (ESI) calculated for  $\text{C}_{11}\text{H}_{16}\text{NO}$  ( $\text{M}+\text{H}$ ) $^+$ : 178.1227, found: 178.1223.

#### 4-(3-methoxyphenyl)morpholine (2al)

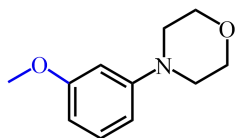

Colorless oil. Yield: 56% (32.4 mg).  $^1\text{H NMR}$  (400 MHz,  $\text{CDCl}_3$ )  $\delta$  7.21 (t,  $J = 8.3$  Hz, 1H), 6.59-6.53 (m, 1H), 6.49-6.46 (m, 2H), 3.91-3.84 (m, 4H), 3.82 (s, 3H), 3.21-3.13 (m, 4H).  $^{13}\text{C NMR}$  (100 MHz,  $\text{CDCl}_3$ )  $\delta$  160.66, 152.70, 129.90, 108.51, 104.79, 102.27, 66.90, 55.22, 49.33. HRMS (ESI) calculated for  $\text{C}_{11}\text{H}_{16}\text{NO}_2$  ( $\text{M}+\text{H}$ ) $^+$ : 194.1177, found: 194.1175.

#### 4-(pyridin-2-yl)morpholine (2ao)

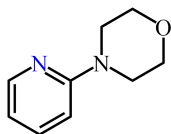

Yellow oil. Yield: 68% (33.5 mg).  $^1\text{H NMR}$  (400 MHz,  $\text{CDCl}_3$ )  $\delta$  8.23 (dd,  $J = 4.8, 1.1$  Hz, 1H), 7.53 (ddd,  $J = 8.9, 7.2, 1.9$  Hz, 1H), 6.86-6.51 (m, 2H), 4.00-3.71 (m, 4H), 3.63-3.37 (m, 4H).  $^{13}\text{C NMR}$  (100 MHz,  $\text{CDCl}_3$ )  $\delta$  147.84, 137.66, 113.84, 107.04, 100.00, 66.78, 45.67. HRMS (ESI) calculated for  $\text{C}_9\text{H}_{13}\text{N}_2\text{O}$  ( $\text{M}+\text{H}$ ) $^+$ : 165.1023, found: 165.1025.

#### 2-(3-bromophenyl)-1, 2, 3, 4-tetrahydroisoquinoline (2ap)

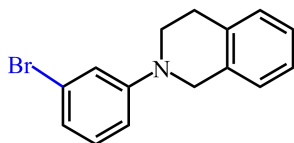

Colorless oil. Yield: 68% (58.7 mg).  $^1\text{H NMR}$  (400 MHz,  $\text{CDCl}_3$ )  $\delta$  7.24-7.01 (m, 5H), 6.88 (t,  $J = 2.2$  Hz, 1H), 6.82-6.66 (m, 2H), 4.34 (s, 2H), 3.48 (t,  $J = 5.9$  Hz, 2H), 2.92 (t,  $J = 5.8$  Hz, 2H).  $^{13}\text{C NMR}$  (125 MHz,  $\text{CDCl}_3$ )  $\delta$  151.46, 135.16, 134.88, 134.07, 130.21, 128.52, 126.63, 126.30, 118.04, 114.43, 112.67, 50.11, 45.95, 29.12. HRMS (ESI) calculated for  $\text{C}_{15}\text{H}_{15}\text{NBr}$  ( $\text{M}+\text{H}$ ) $^+$ : 288.0383, found: 288.0385.

#### 4-(3, 4-dihydroisoquinolin-2(1H)-yl)benzonitrile (2aq)

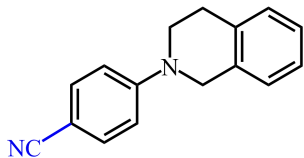

Yellow solid. M. p. 90-91 °C. Yield: 62% (43.5 mg).  $^1\text{H NMR}$  (400 MHz,  $\text{CDCl}_3$ )  $\delta$  7.59-7.46 (m, 2H), 7.34-7.11 (m, 4H), 6.95-6.74 (m, 2H), 4.52 (s, 2H), 3.66 (t,  $J = 5.9$  Hz, 2H), 3.02 (t,  $J = 5.9$  Hz, 2H).  $^{13}\text{C NMR}$  (125 MHz,  $\text{CDCl}_3$ )  $\delta$  152.21, 134.93, 133.58, 133.42, 128.21, 126.97, 126.56, 126.50, 120.45, 112.68, 98.65, 48.79, 44.62, 28.96. HRMS (ESI) calculated for  $\text{C}_{16}\text{H}_{15}\text{N}_2$  ( $\text{M}+\text{H}$ ) $^+$ : 235.1230, found: 235.1226.

### 2-(4-methoxyphenyl)-1, 2, 3, 4-tetrahydroisoquinoline (2ar)

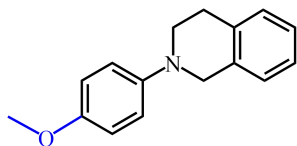

White solid. M. p. 93-95 °C. Yield: 50% (35.8 mg).  $^1\text{H NMR}$  (400 MHz,  $\text{CDCl}_3$ )  $\delta$  7.14 (dd,  $J = 9.9, 3.4$  Hz, 4H), 6.98 (d,  $J = 9.0$  Hz, 2H), 6.86 (d,  $J = 9.0$  Hz, 2H), 4.29 (s, 2H), 3.77 (s, 3H), 3.44 (t,  $J = 5.8$  Hz, 2H), 2.98 (t,  $J = 5.7$  Hz, 2H).  $^{13}\text{C NMR}$  (100 MHz,  $\text{CDCl}_3$ )  $\delta$  158.09, 150.61, 136.09, 129.22, 127.54, 126.68, 118.65, 115.17, 113.21, 112.37, 55.32, 50.22, 46.51, 29.43. **HRMS** (ESI) calculated for  $\text{C}_{16}\text{H}_{18}\text{NO}$  ( $\text{M}+\text{H}$ ) $^+$ : 240.1383, found: 240.1380.

### 5, 6-dihydroindolo[2, 1-a]isoquinoline (3p)

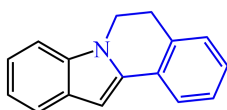

White solid. M.p. 167 – 169 °C. Yield: 60% (39.4 mg).  $^1\text{H NMR}$  (400 MHz, DMSO)  $\delta$  7.83 (d,  $J = 7.6$  Hz, 1H), 7.57 (d,  $J = 7.8$  Hz, 1H), 7.49 (d,  $J = 8.2$  Hz, 1H), 7.34 (dd,  $J = 14.4, 7.4$  Hz, 2H), 7.27 (t,  $J = 7.3$  Hz, 1H), 7.15 (t,  $J = 7.6$  Hz, 1H), 7.04 (t,  $J = 7.4$  Hz, 1H), 6.96 (s, 1H), 4.28 (t,  $J = 6.5$  Hz, 2H), 3.17 (t,  $J = 6.5$  Hz, 2H).  $^{13}\text{C NMR}$  (100 MHz,  $\text{CDCl}_3$ )  $\delta$  136.66, 135.62, 132.17, 129.03, 128.80, 128.31, 127.42, 127.26, 124.39, 121.68, 120.75, 119.88, 108.96, 96.43, 40.11, 29.18. **HRMS** (ESI) calculated for  $\text{C}_{16}\text{H}_{14}\text{N}$  ( $\text{M}+\text{H}$ ) $^+$ : 220.1044, found : 220.1050.

### 2, 3-dihydro-1H-pyrrolo[1, 2-a]indole (3q)

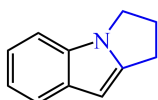

White solid. M. p. 76-78 °C. Yield: 52% (24.5 mg).  $^1\text{H NMR}$  (400 MHz,  $\text{CDCl}_3$ )  $\delta$  7.57 (d,  $J = 7.8$  Hz, 1H), 7.27 (d,  $J = 8.0$  Hz, 1H), 7.14 (t,  $J = 7.0$  Hz, 1H), 7.08 (t,  $J = 7.0$  Hz, 1H), 6.19 (s, 1H), 4.09 (t,  $J = 7.0$  Hz, 2H), 3.05 (t,  $J = 7.4$  Hz, 2H), 2.71-2.55 (m, 2H).  $^{13}\text{C NMR}$  (100 MHz,  $\text{CDCl}_3$ )  $\delta$  144.61, 133.30, 132.70, 120.33, 120.14, 119.13, 109.41, 92.31, 43.62, 27.88, 24.32. **HRMS** (ESI) calculated for  $\text{C}_{11}\text{H}_{12}\text{N}$  ( $\text{M}+\text{H}$ ) $^+$ : 158.0964, found: 158.0969.

### 9-bromo-5, 6-dihydroindolo[2, 1-a]isoquinoline (3ap)

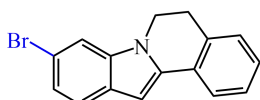

Pale yellow solid. M.p. 149 – 151 °C. Yield: 68% (60.7 mg).  $^1\text{H NMR}$  (400 MHz,  $\text{CDCl}_3$ )  $\delta$  7.73 (s, 2H), 7.37 - 7.21 (m, 4H), 7.17 (d,  $J = 8.5$  Hz, 1H), 6.78 (s, 1H), 4.20 (t,  $J = 5.9$  Hz, 2H), 3.18 (t,  $J = 6.2$  Hz, 2H).  $^{13}\text{C NMR}$  (100 MHz,  $\text{CDCl}_3$ )  $\delta$  137.49,



136.29, 132.09, 128.58, 128.37, 127.77, 127.64, 127.37, 124.45, 123.12, 121.86, 115.13, 112.07, 96.55, 40.24, 29.03. **HRMS** (ESI) calculated for  $C_{16}H_{13}NBr$  ( $M+H$ )<sup>+</sup>: 298.0149, found: 298.0153.

### 5, 6-dihydroindolo[2,1-a]isoquinoline-10-carbonitrile (3aq)

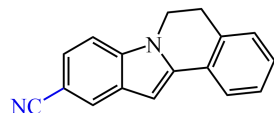

White solid. M.p. 203 – 205 °C. Yield: 62% (45.3 mg). **<sup>1</sup>H NMR** (400 MHz,  $CDCl_3$ )  $\delta$  7.95 (d,  $J = 0.8$  Hz, 1H), 7.76 (d,  $J = 7.4$  Hz, 1H), 7.42 (dd,  $J = 8.5, 1.5$  Hz, 1H), 7.39 – 7.32 (m, 2H), 7.29 (d,  $J = 3.9$  Hz, 2H), 6.91 (s, 1H), 4.29 (t,  $J = 6.6$  Hz, 2H), 3.22 (t,  $J = 6.5$  Hz, 2H). **<sup>13</sup>C NMR** (100 MHz,  $CDCl_3$ )  $\delta$  138.08, 137.89, 132.25, 128.49, 128.46, 127.95, 127.58, 126.07, 124.80, 124.55, 120.90, 109.74, 102.79, 97.04, 40.41, 28.87. **HRMS** (ESI) calcd. for  $C_{17}H_{13}N_2$  ( $M+H$ )<sup>+</sup>: 245.0996, found: 245.0998.

### 10-methoxy-5, 6-dihydroindolo[2,1-a]isoquinoline (3ar)

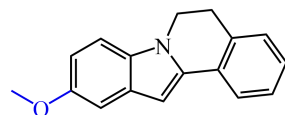

White solid. M.p. 188 – 190 °C. Yield: 50% (37.3 mg). **<sup>1</sup>H NMR** (400 MHz,  $CDCl_3$ )  $\delta$  7.71 (d,  $J = 7.7$  Hz, 1H), 7.50 (d,  $J = 8.5$  Hz, 1H), 7.32 – 7.16 (m, 3H), 6.82 – 6.75 (m, 3H), 4.20 (t,  $J = 6.5$  Hz, 2H), 3.89 (s, 3H), 3.18 (t,  $J = 6.5$  Hz, 2H). **<sup>13</sup>C NMR** (100 MHz,  $CDCl_3$ )  $\delta$  156.39, 137.41, 134.77, 131.67, 129.26, 128.27, 127.22, 126.93, 123.90, 123.11, 121.38, 109.86, 96.39, 92.63, 55.75, 40.15, 29.20. **HRMS** (ESI) calculated for  $C_{17}H_{16}NO$  ( $M+H$ )<sup>+</sup>: 250.1151, found: 250.1155.

## 6. $^1\text{H}$ and $^{13}\text{C}$ NMR Spectra

### NMR of 1a

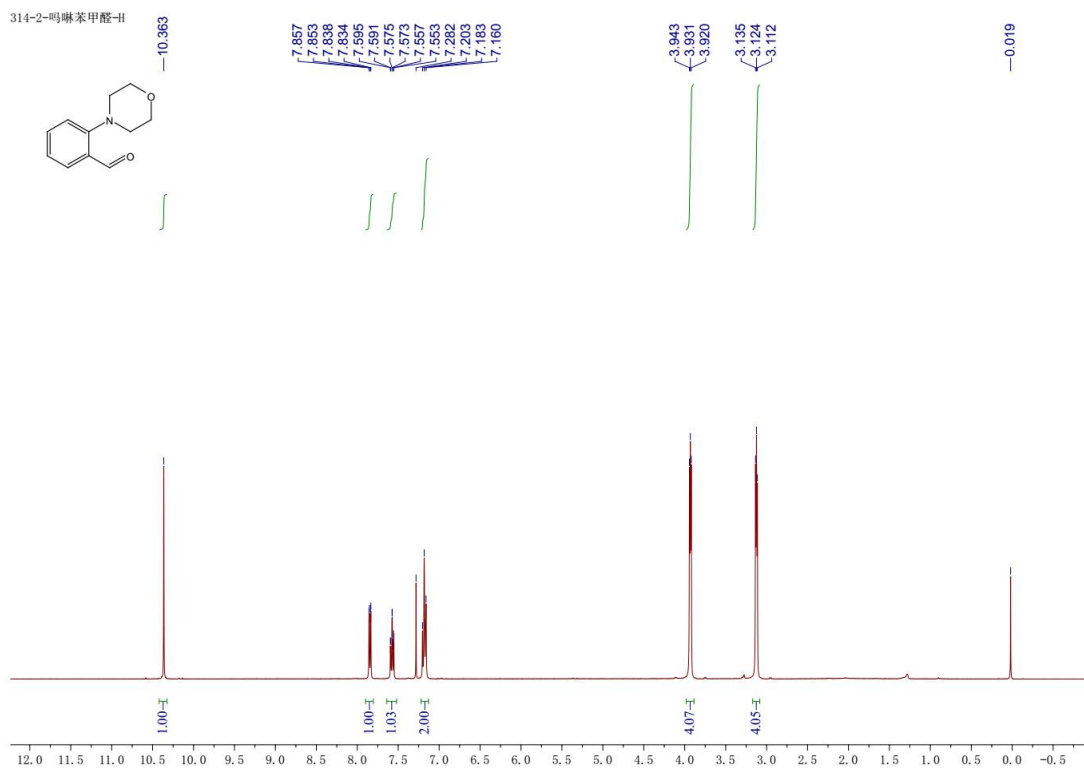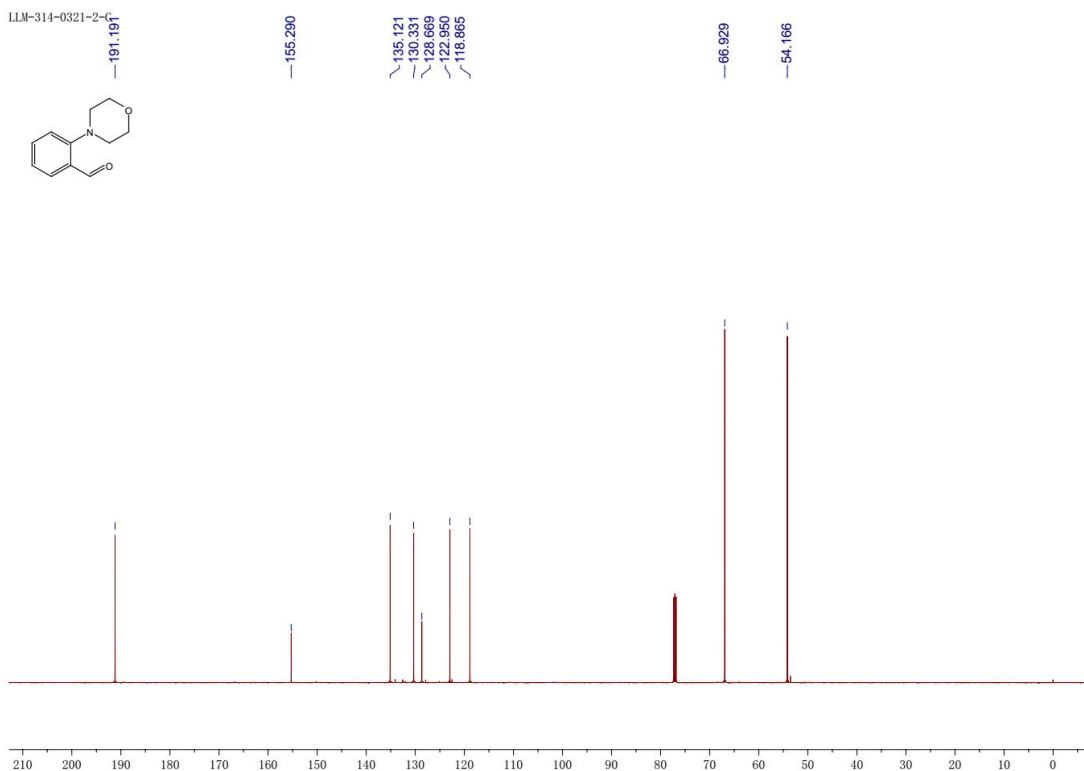

# NMR of 1b

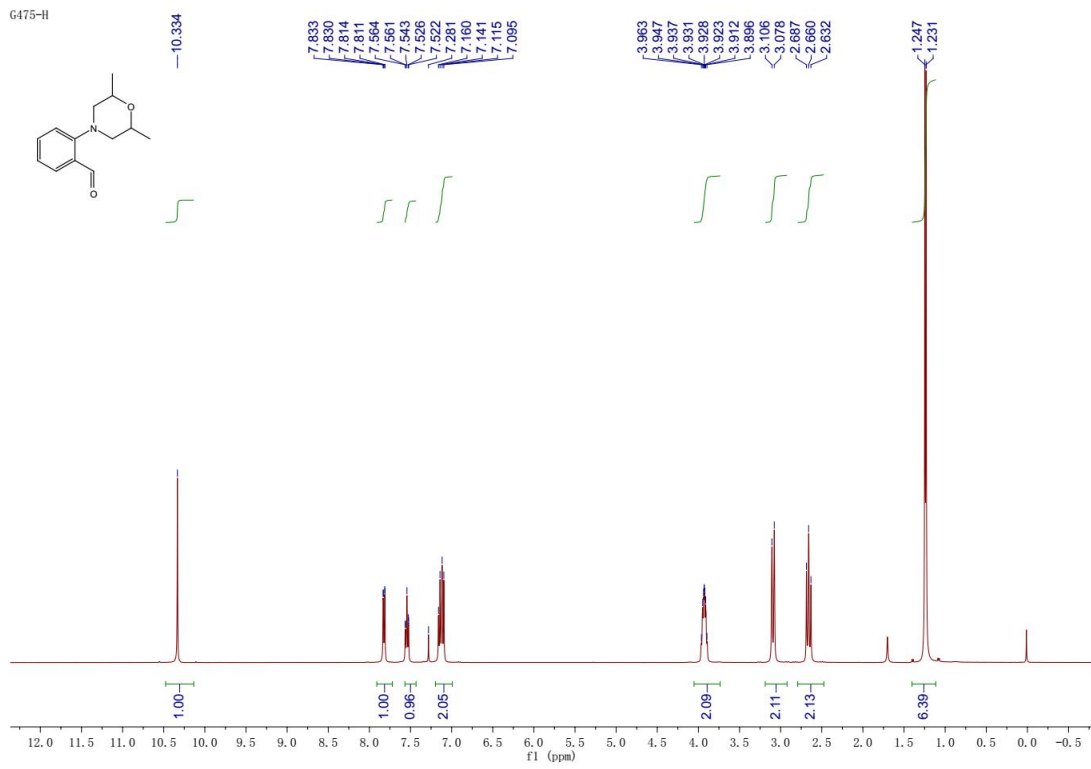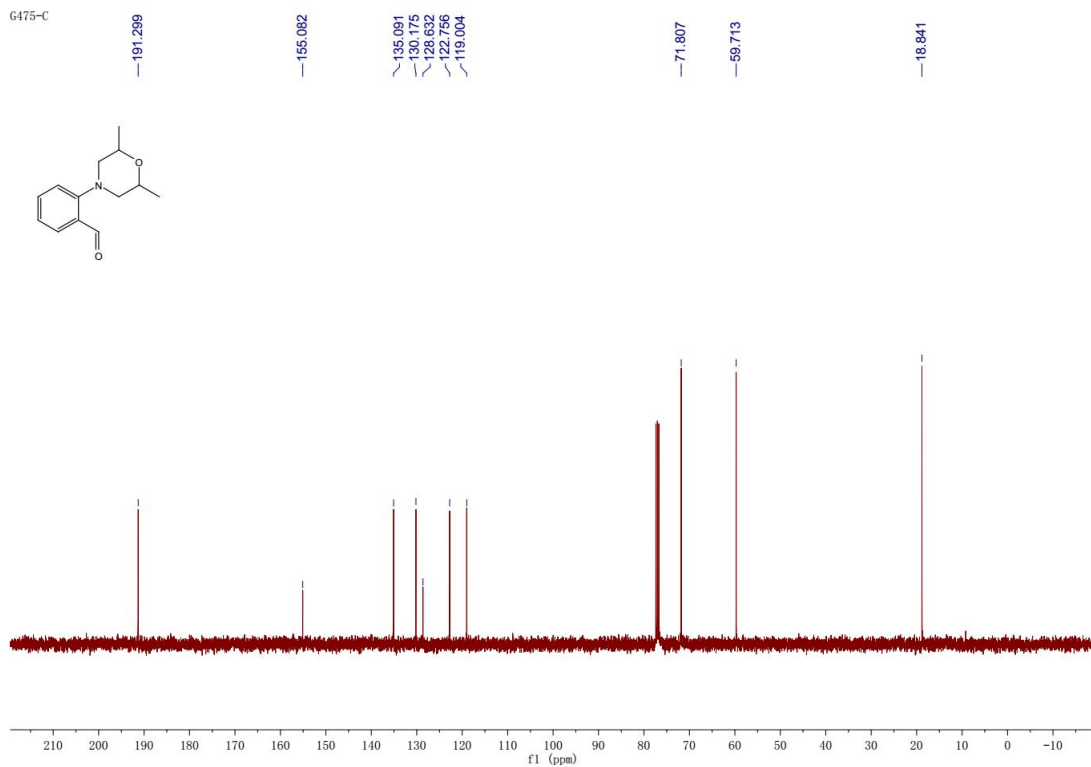

# NMR of 1c

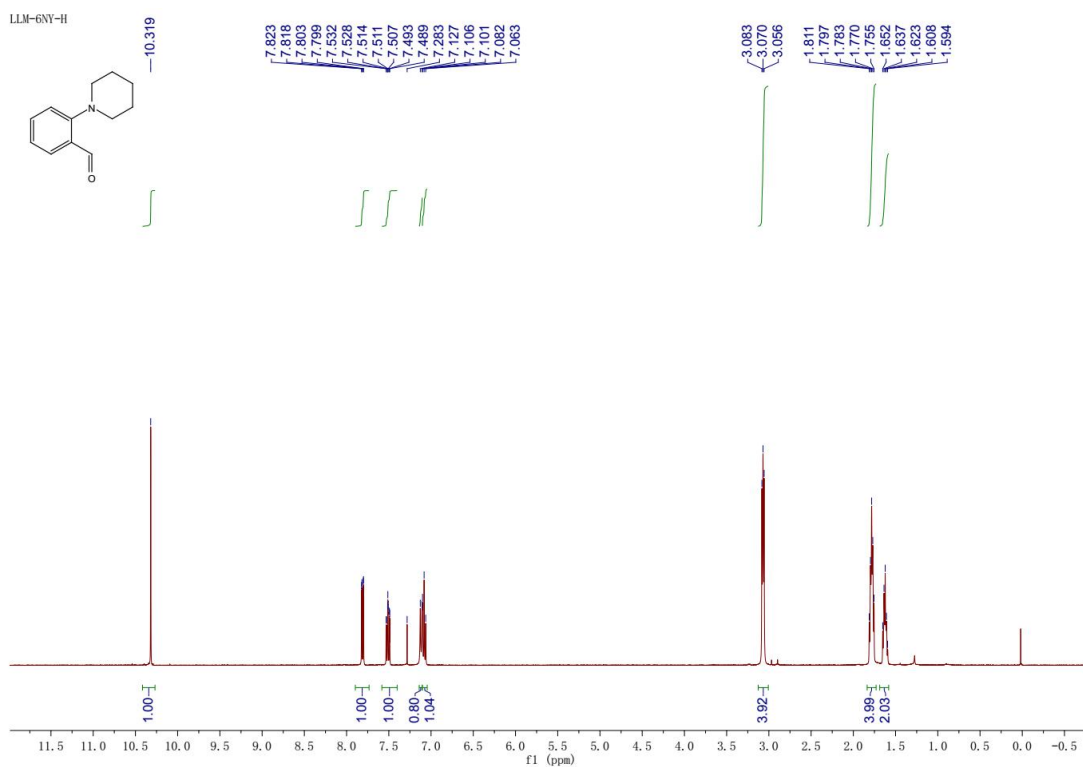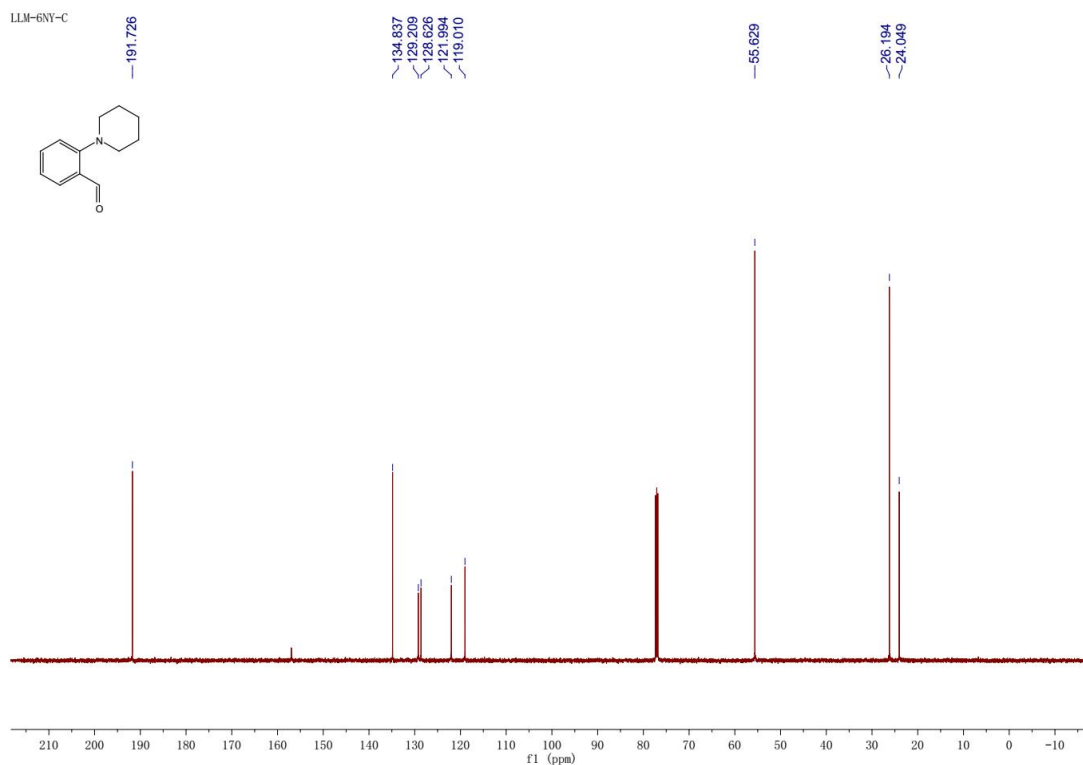

# NMR of 1d

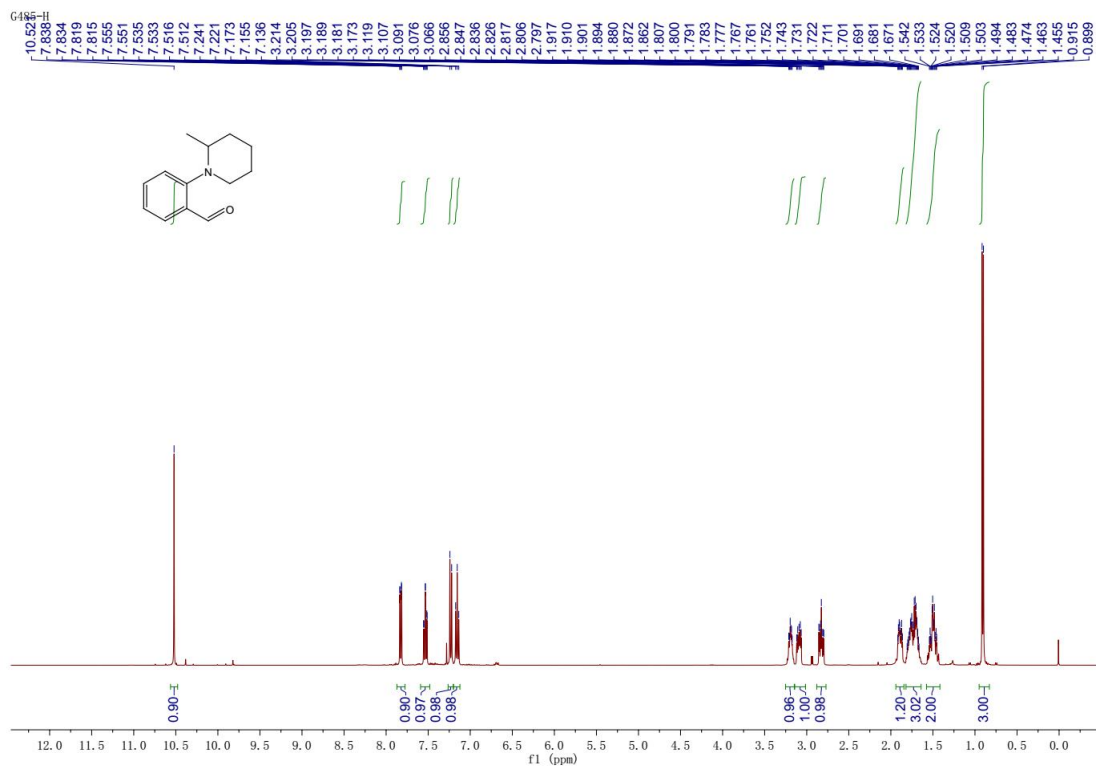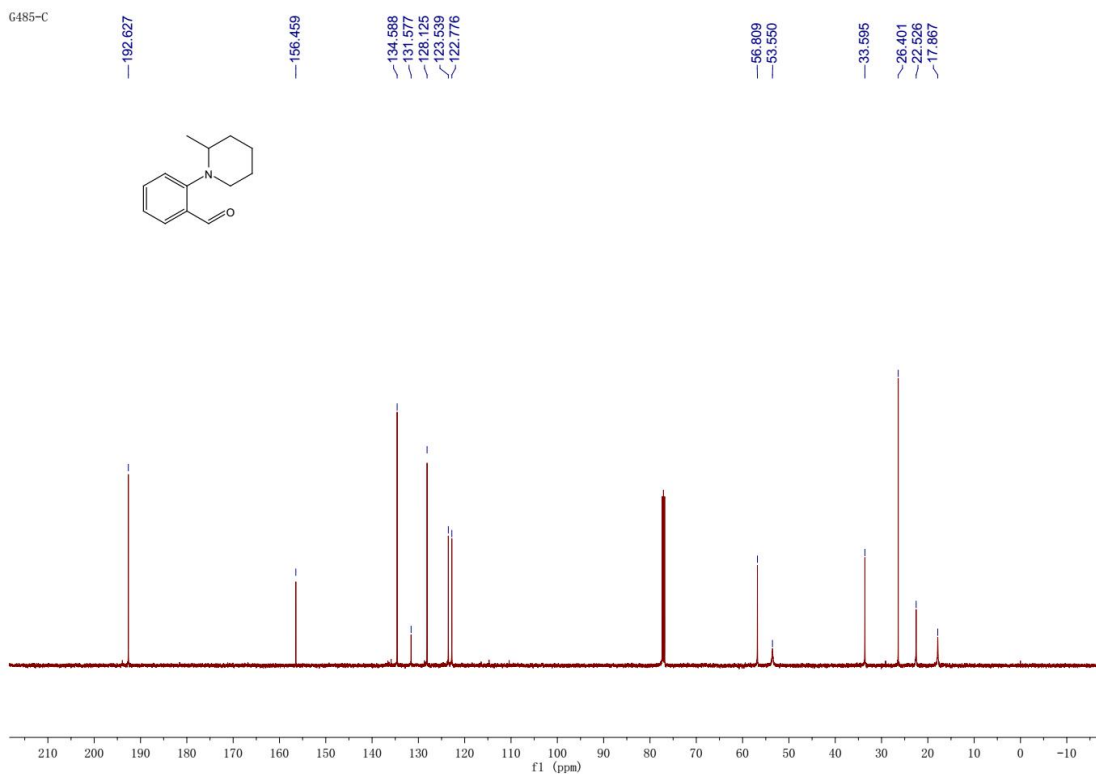

# NMR of 1e

LLM-411-0506-H

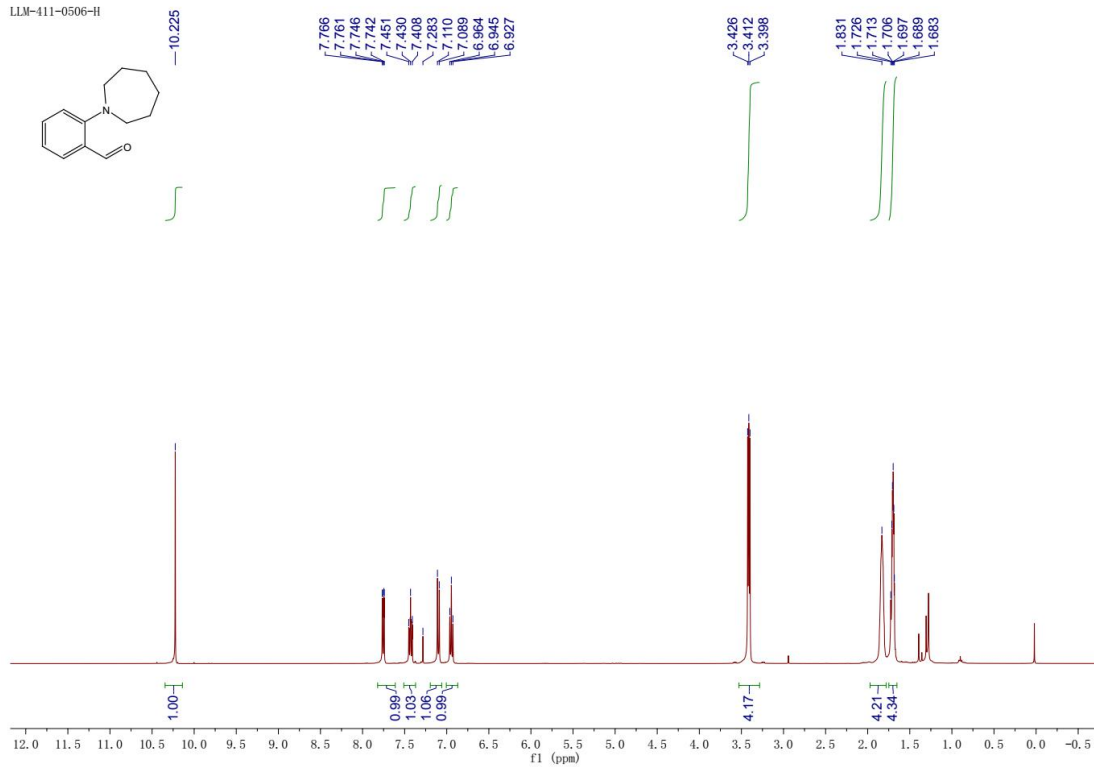

411-C

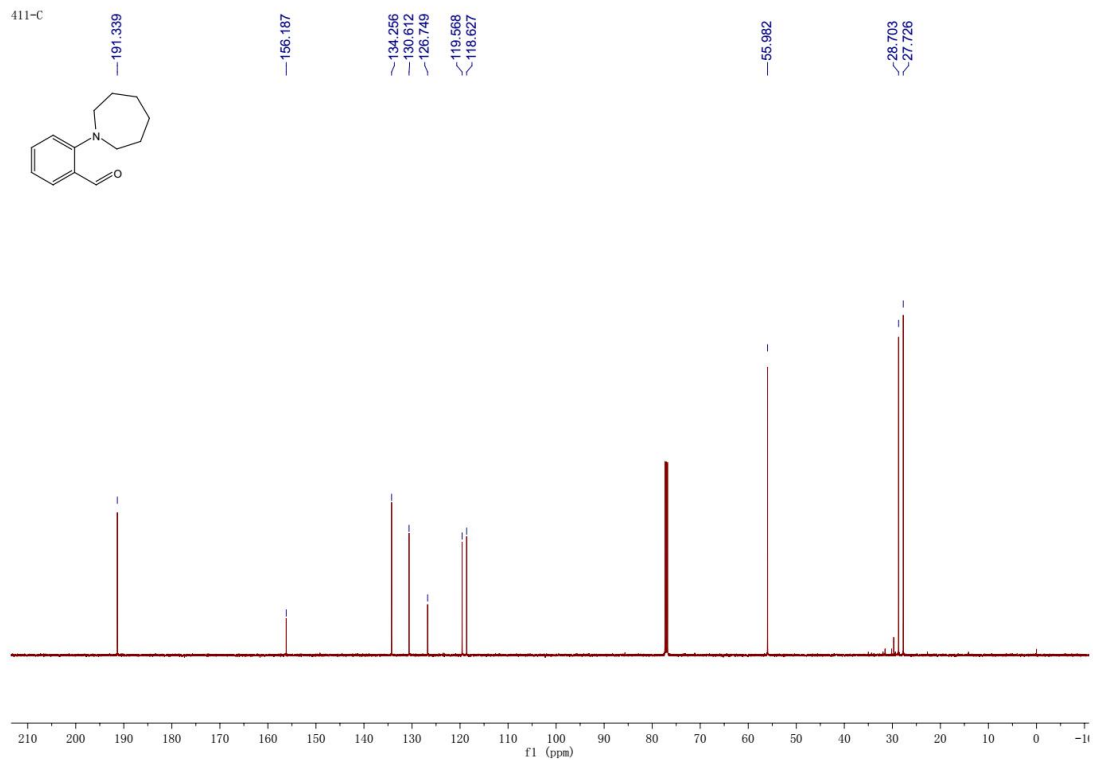

# NMR of 1f

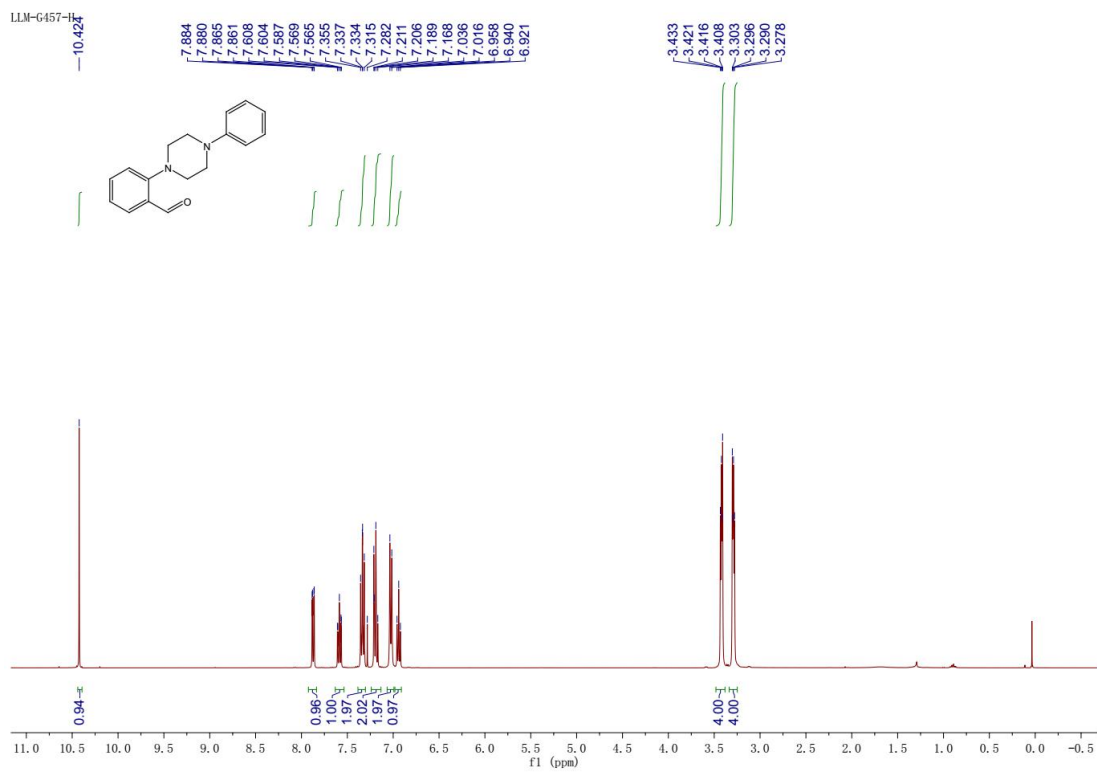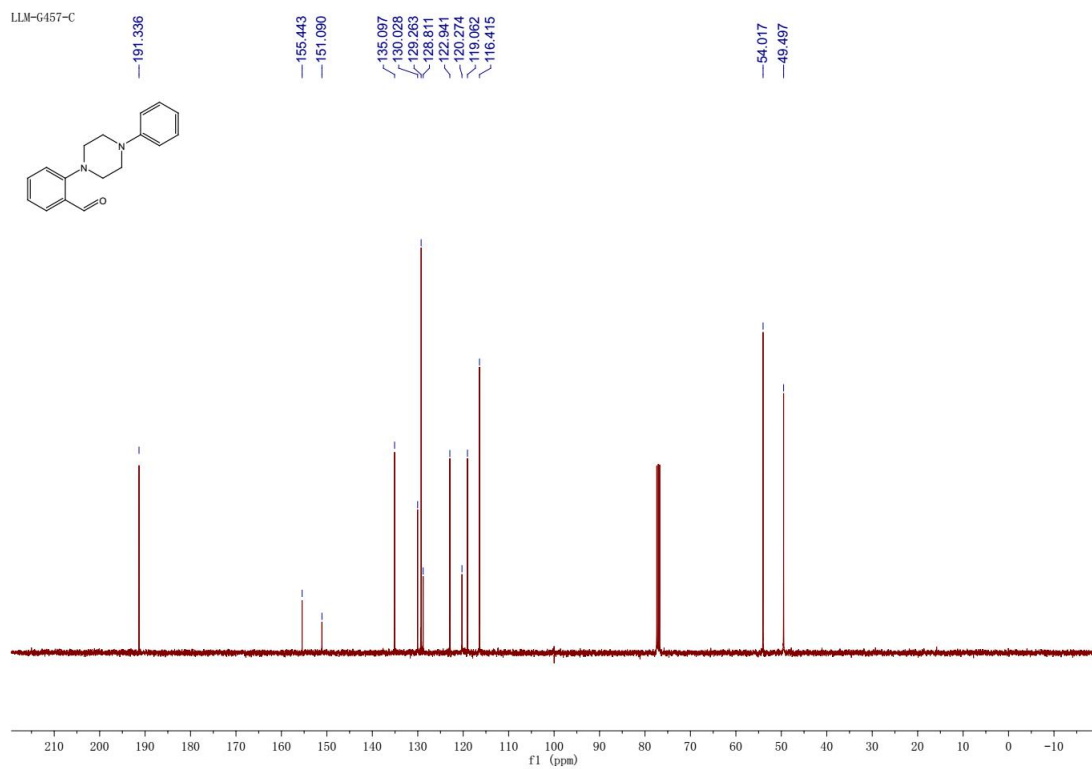

# NMR of 1g

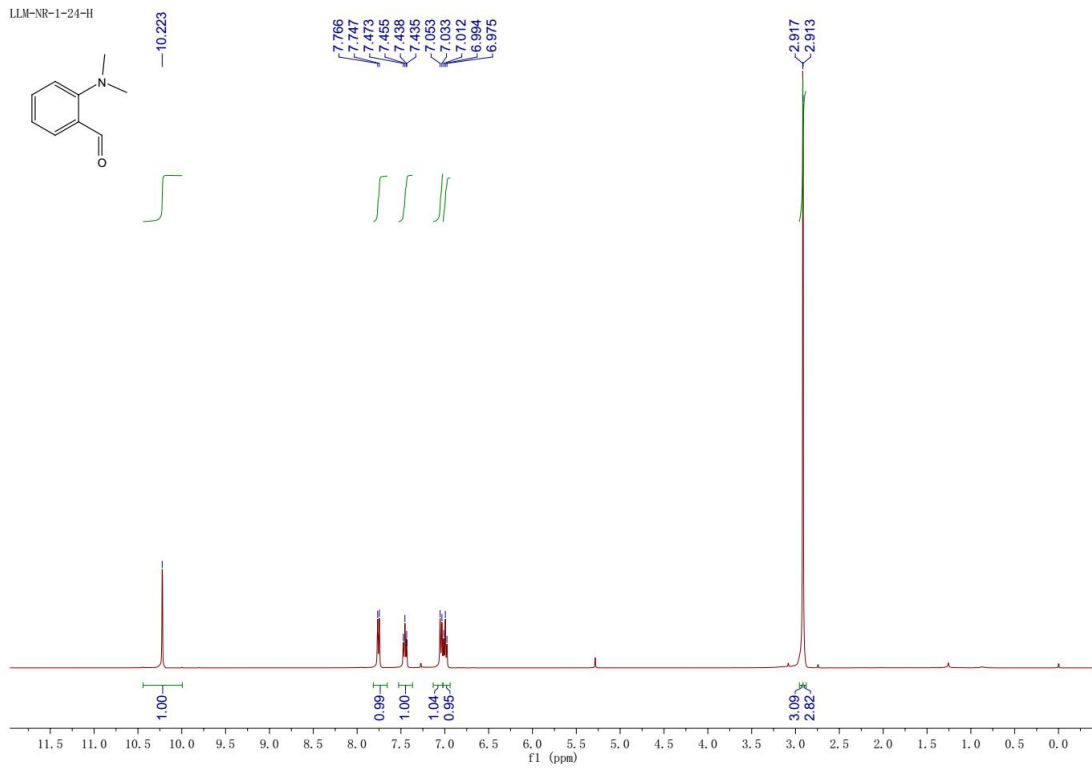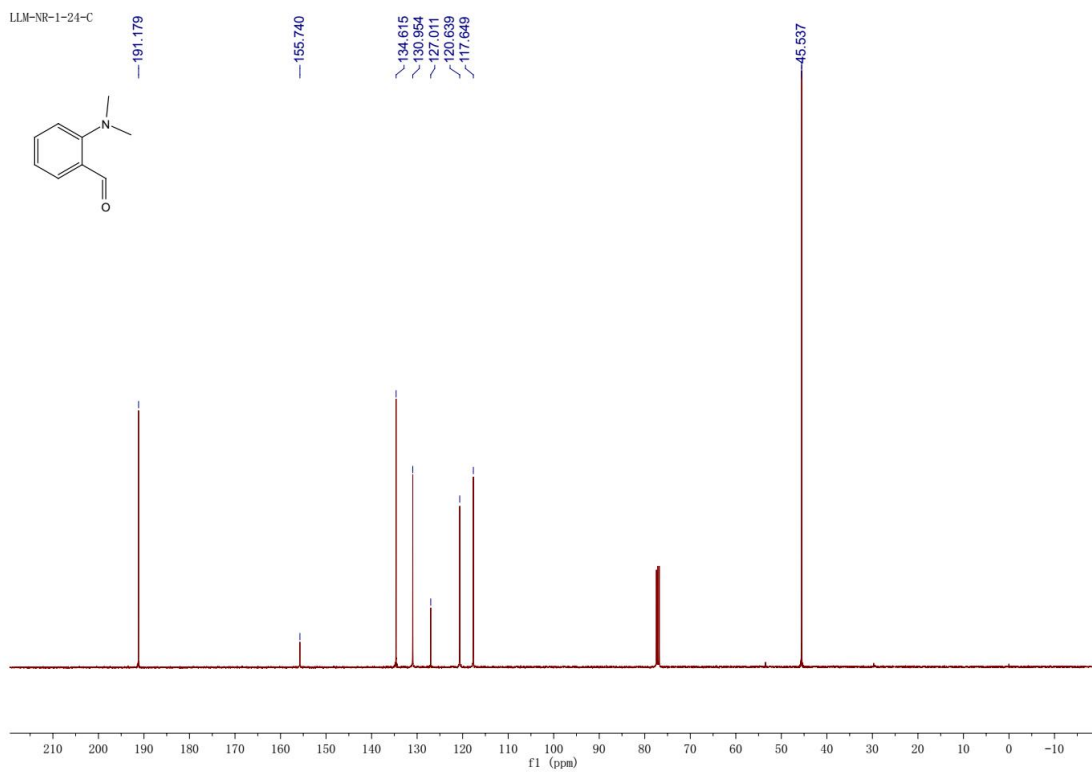



# NMR of 1h

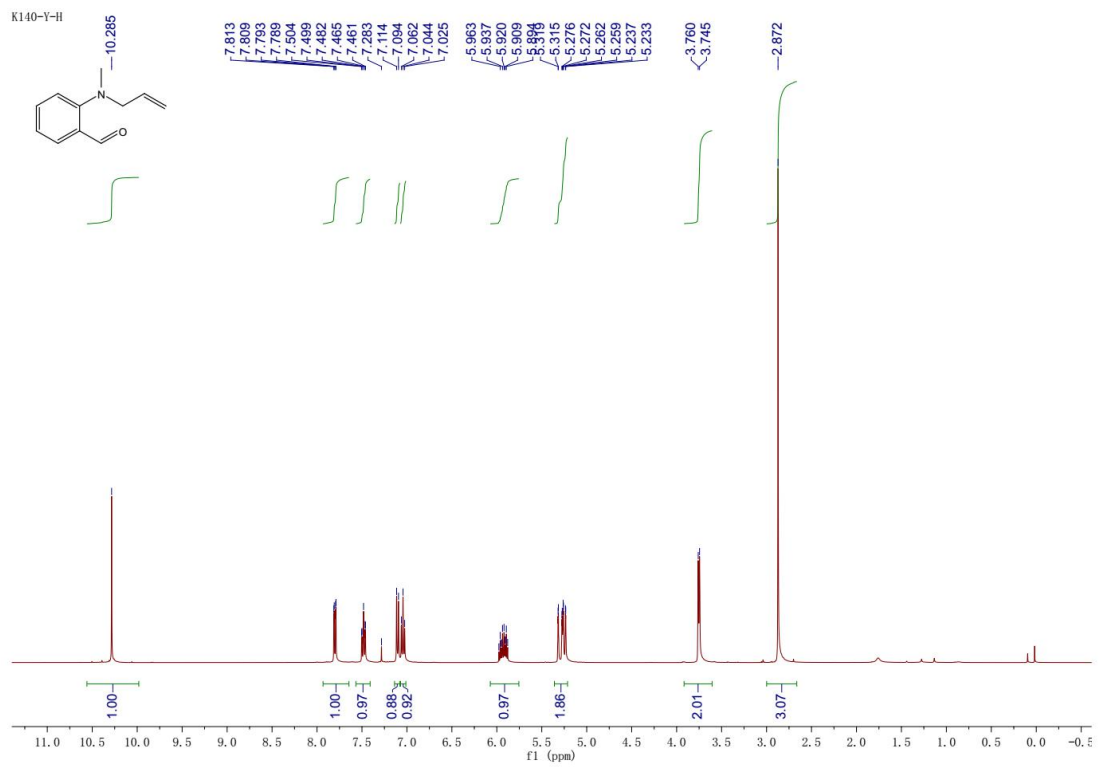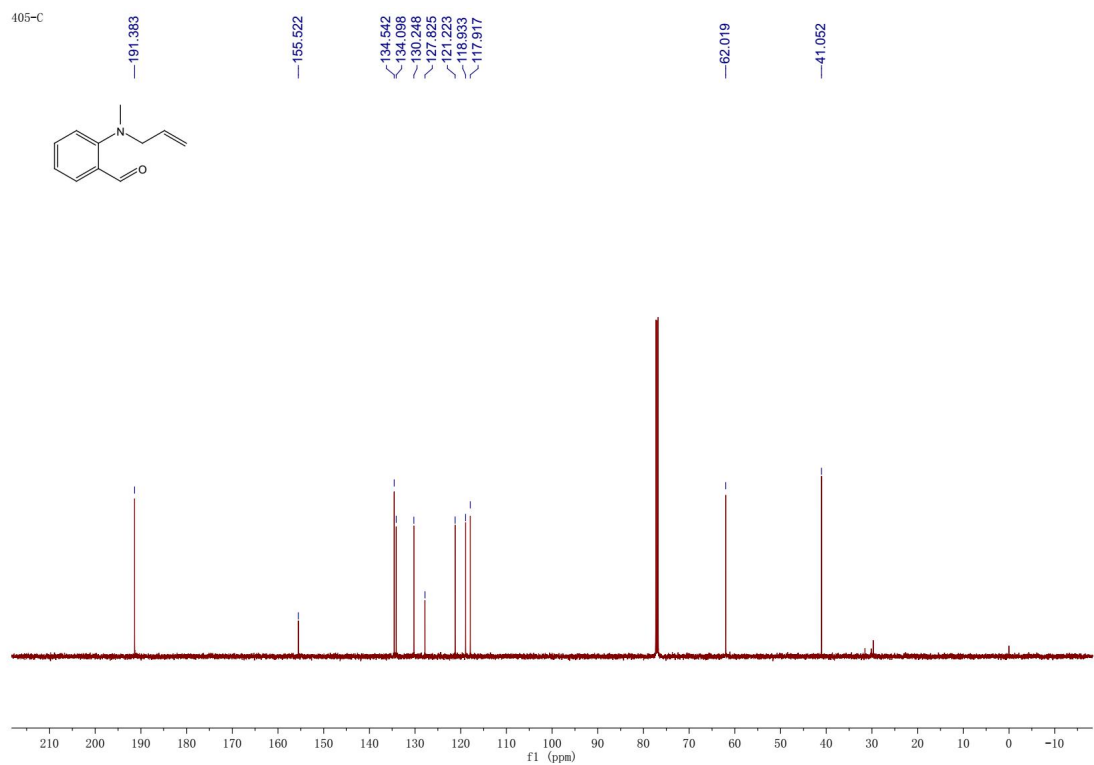

# NMR of 1i

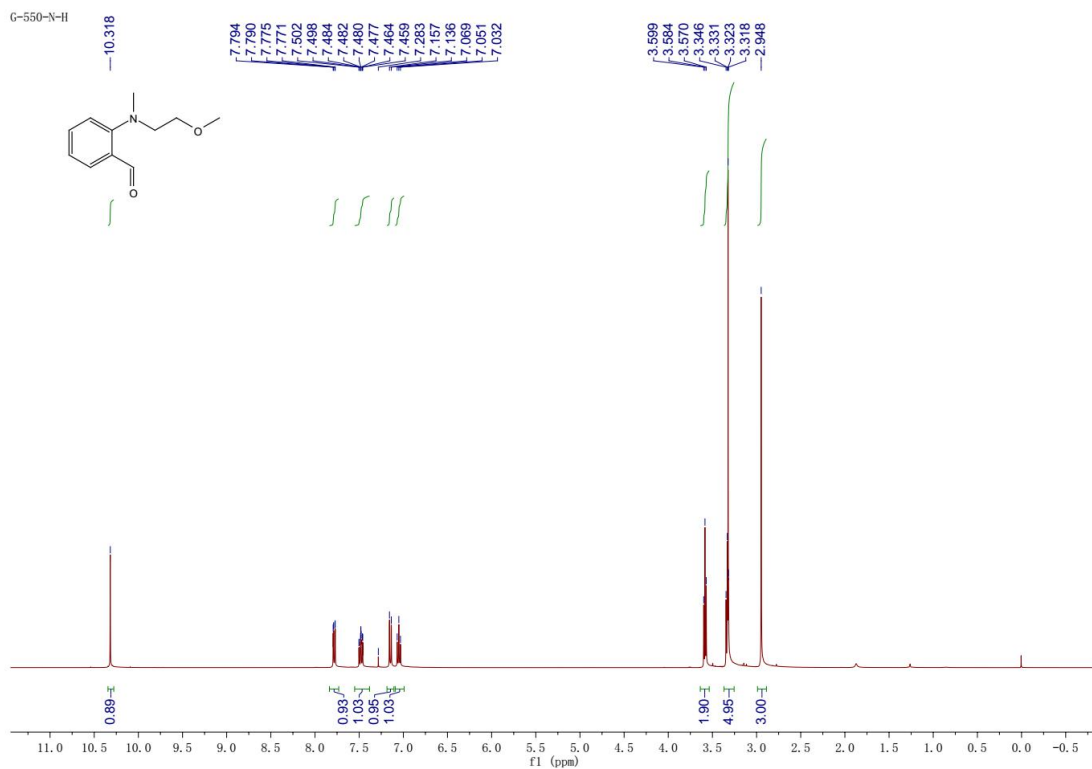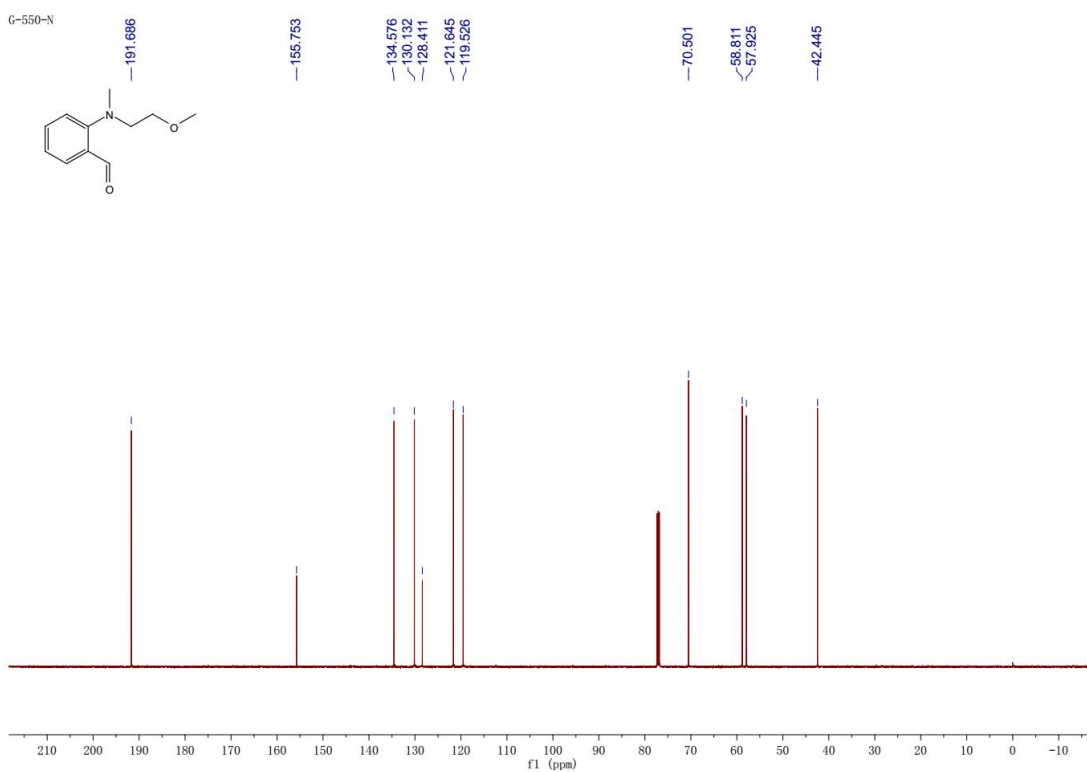

# NMR of 1j

LLM-6415-2-H

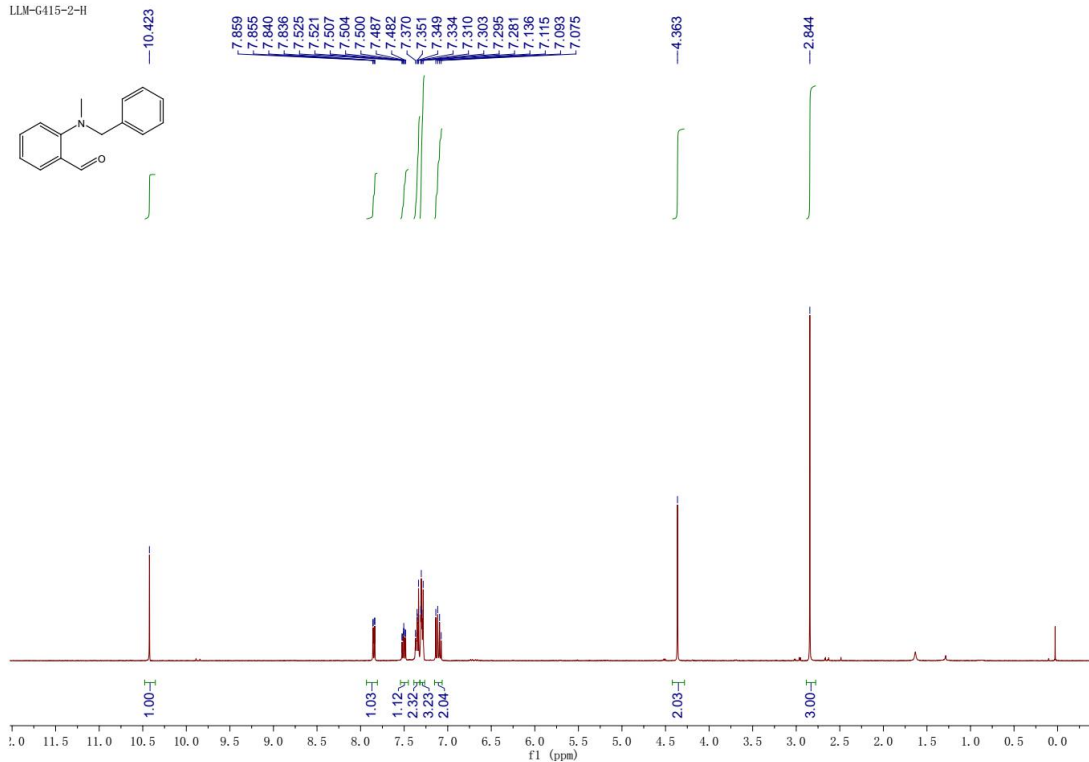

LLM-279-C-0405

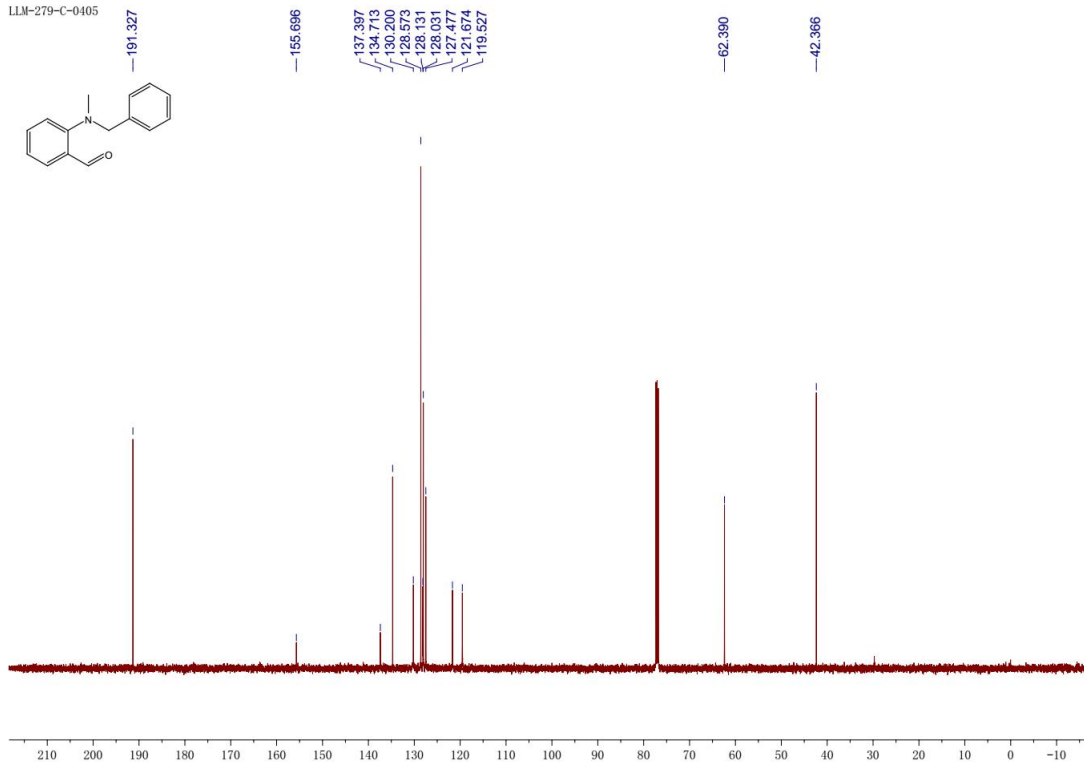

# NMR of 1k

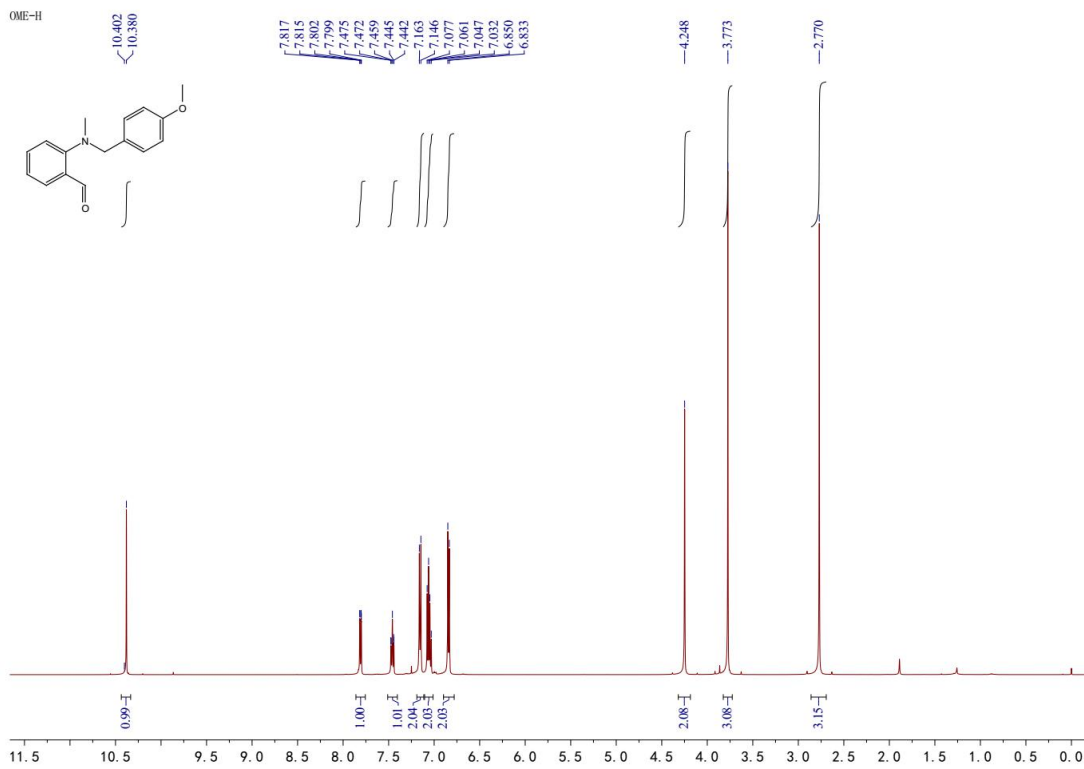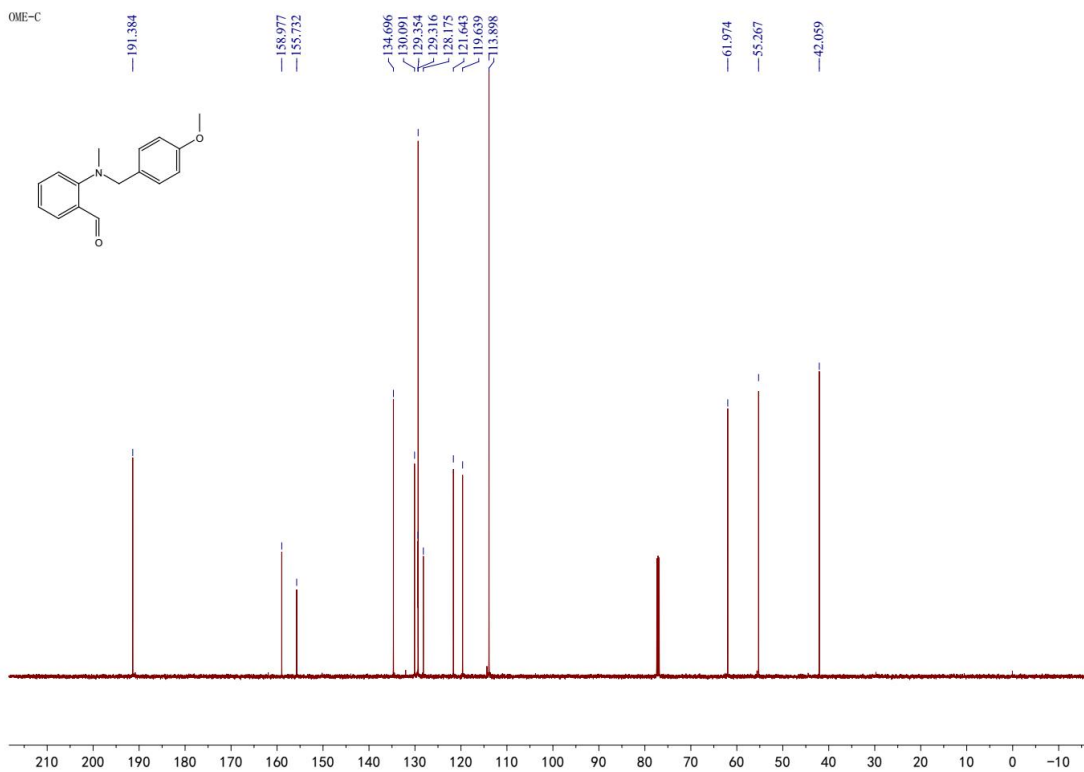

# NMR of 11

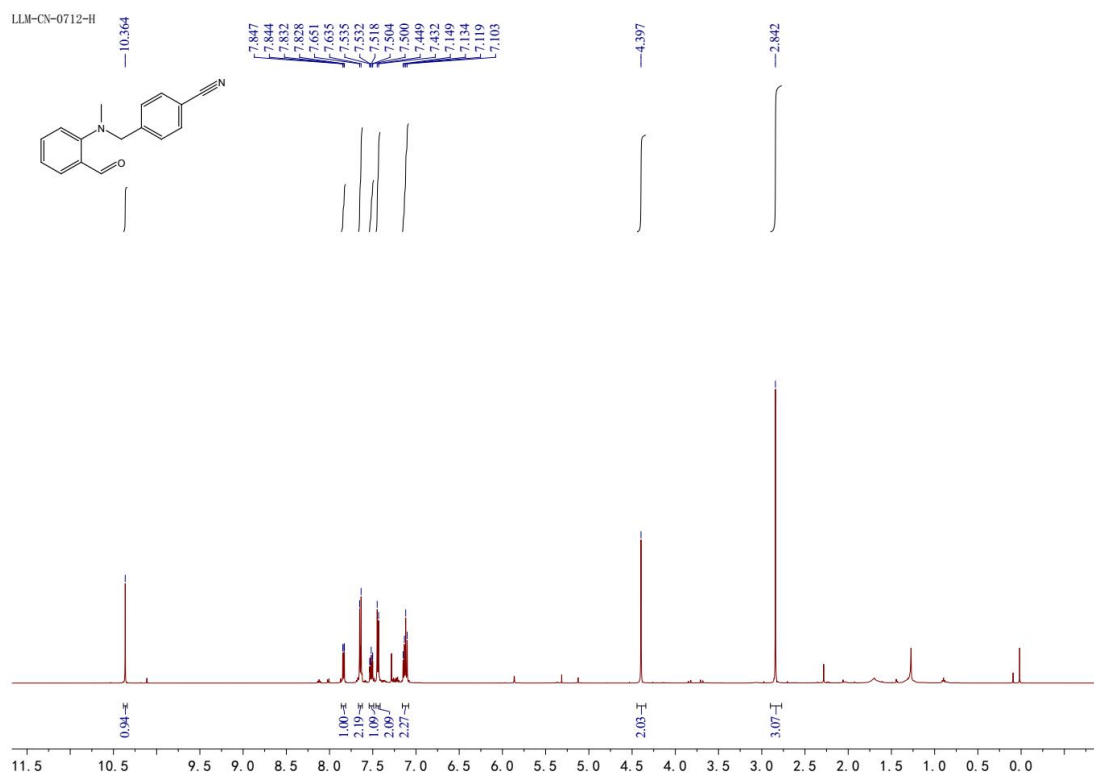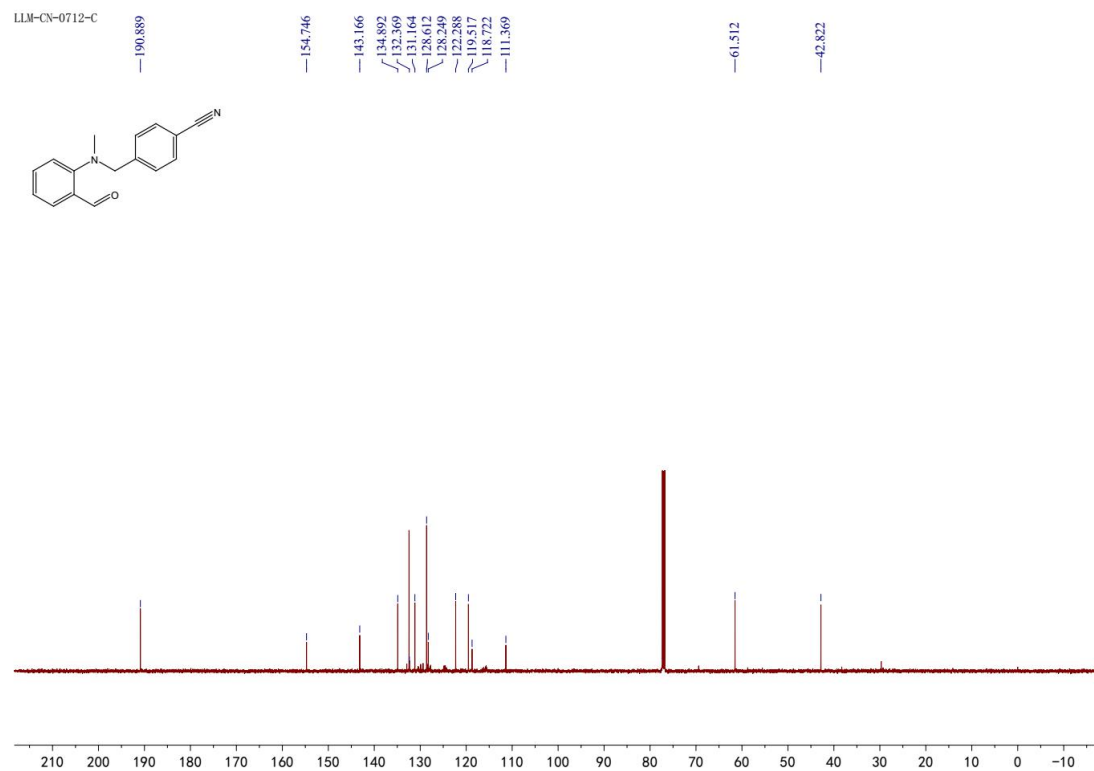

# NMR of 1m

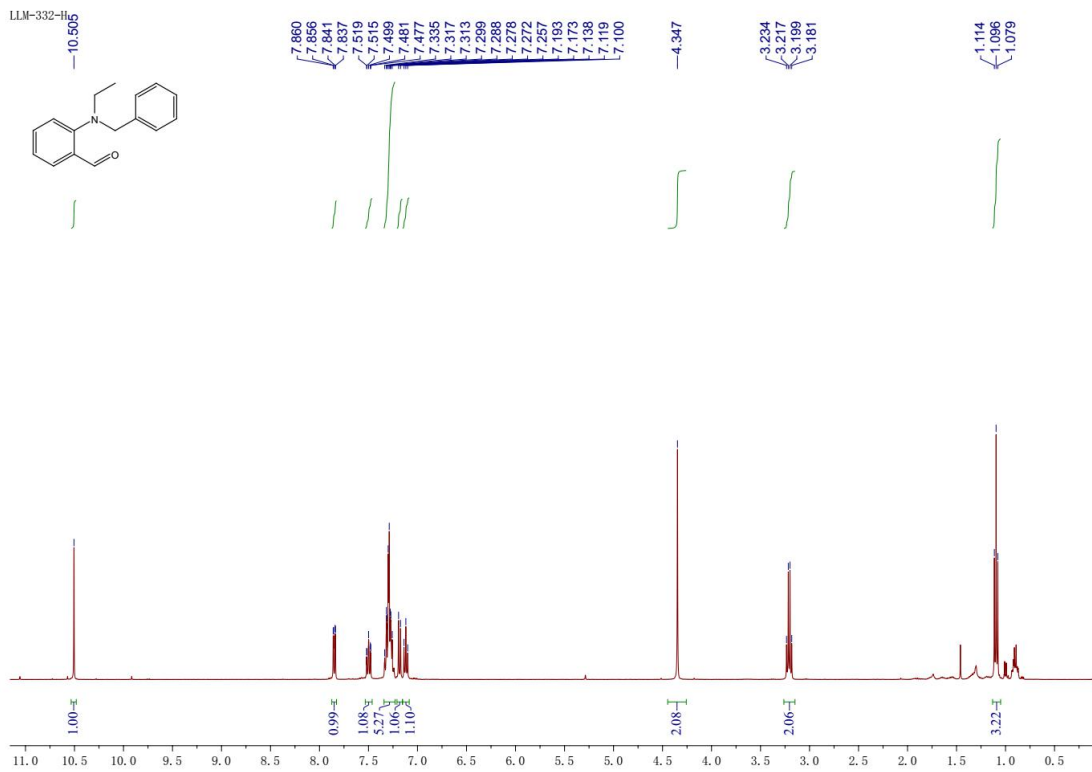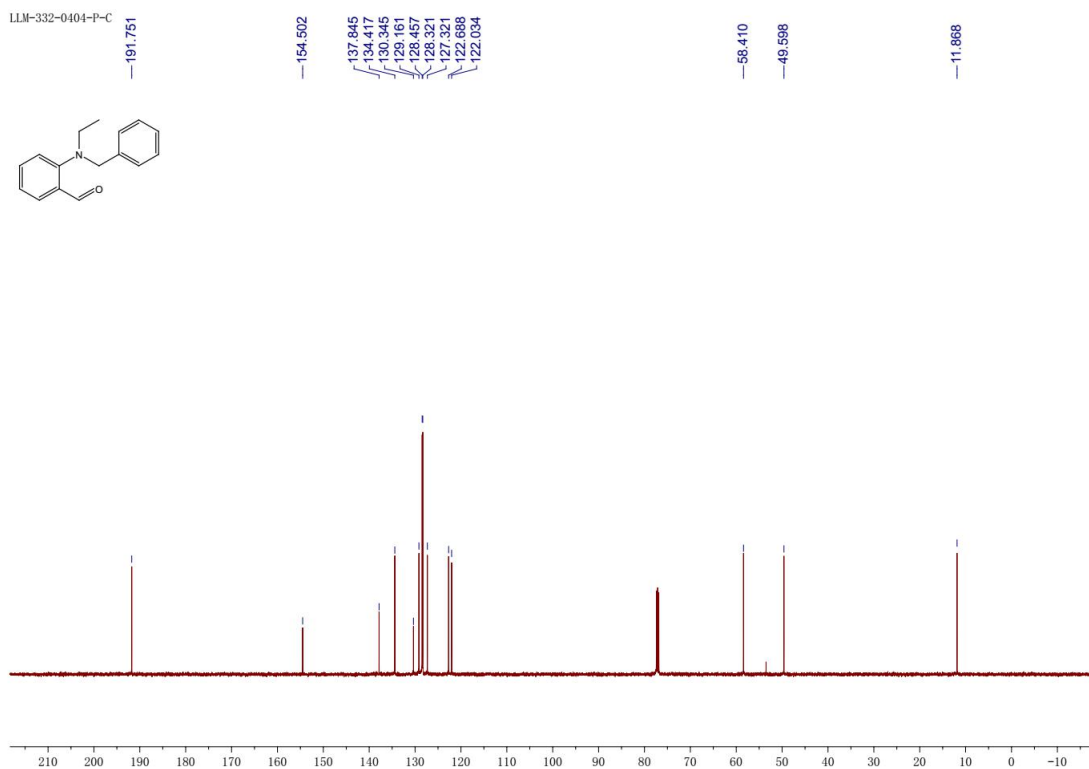

# NMR of 1n

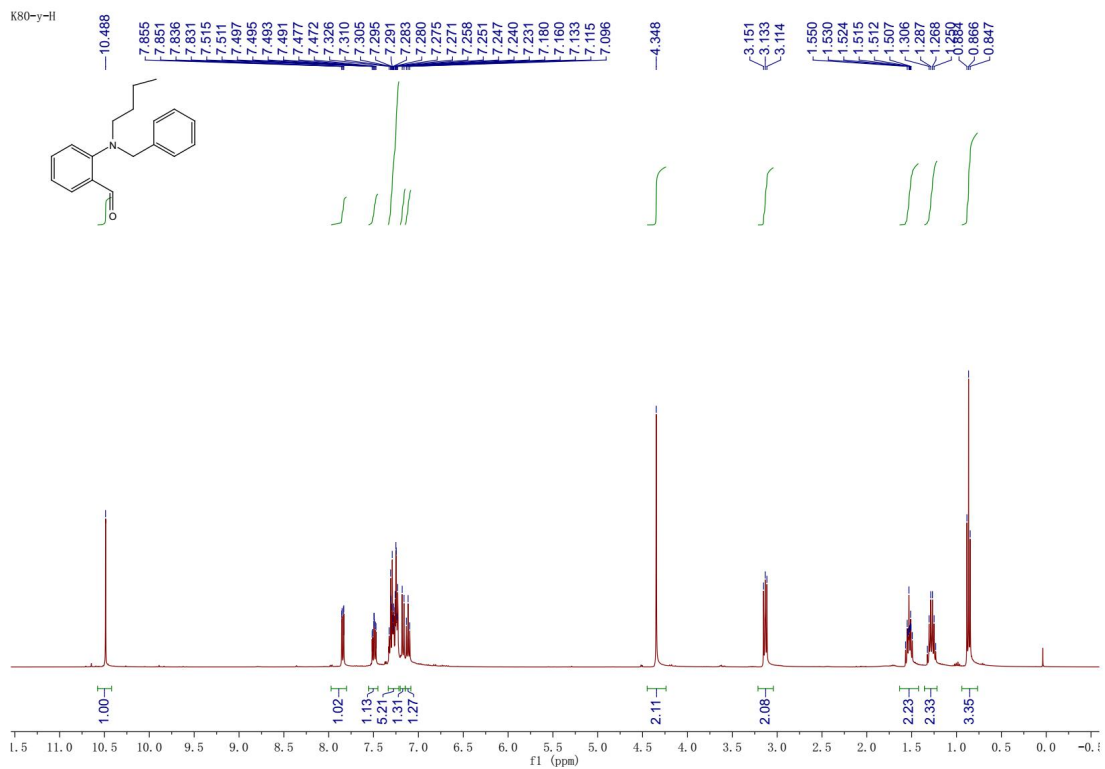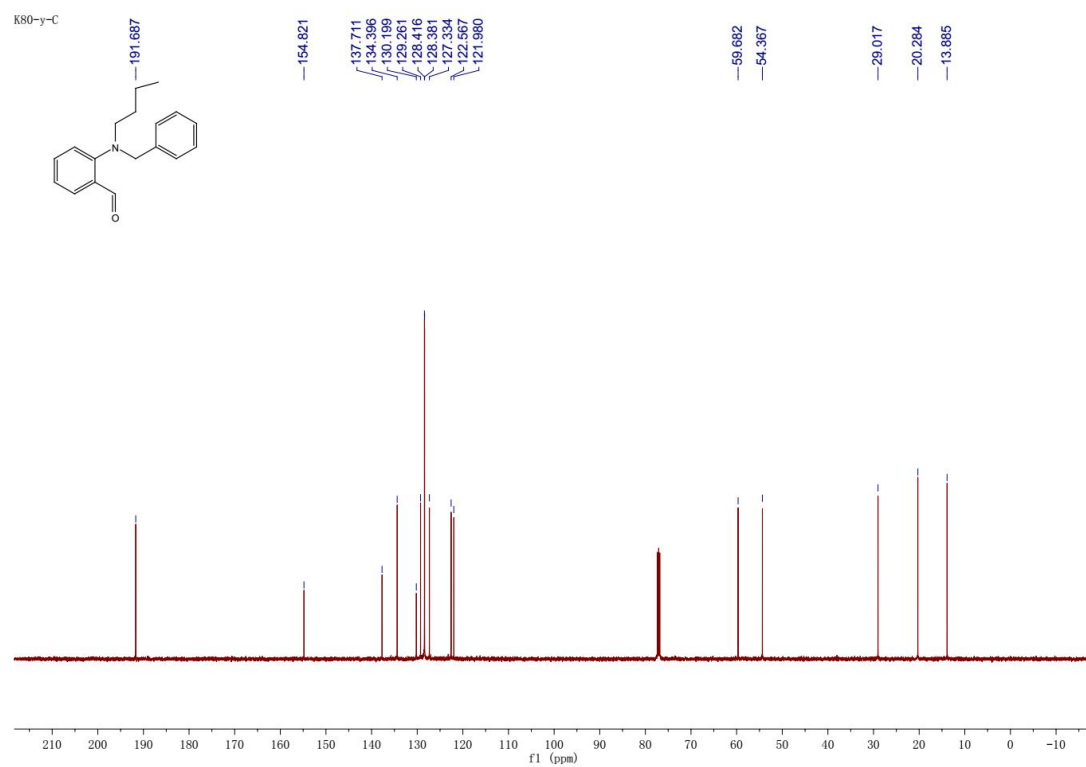

# NMR of 1o

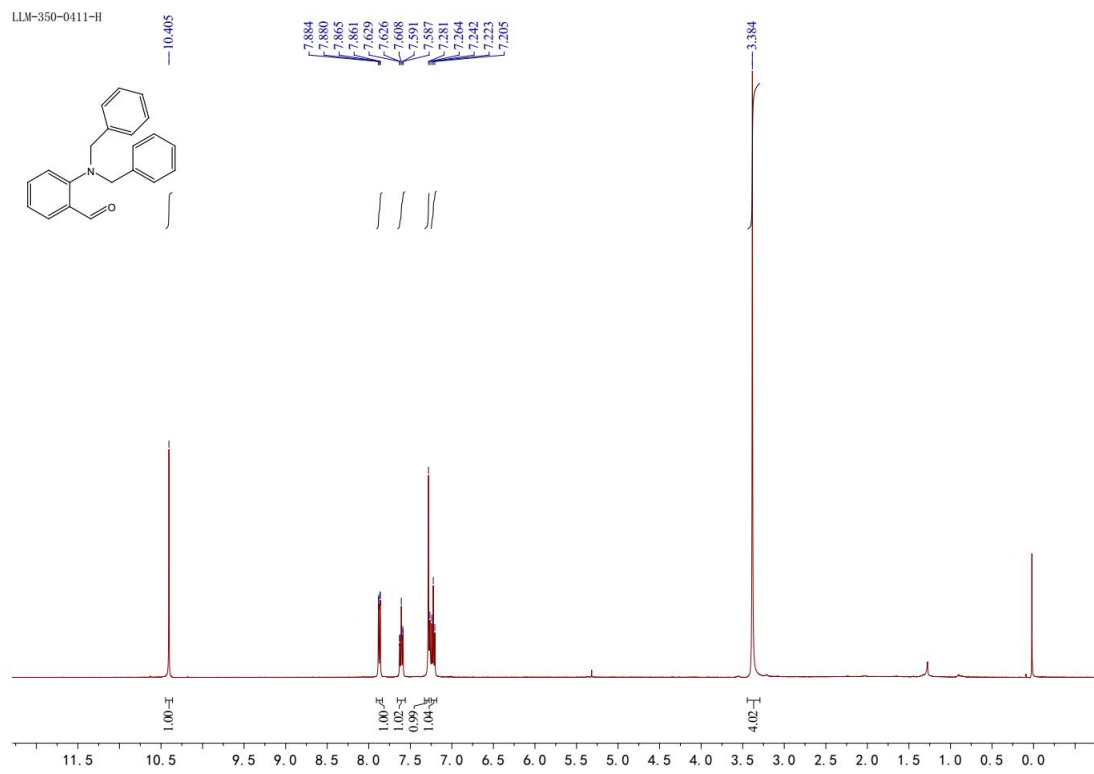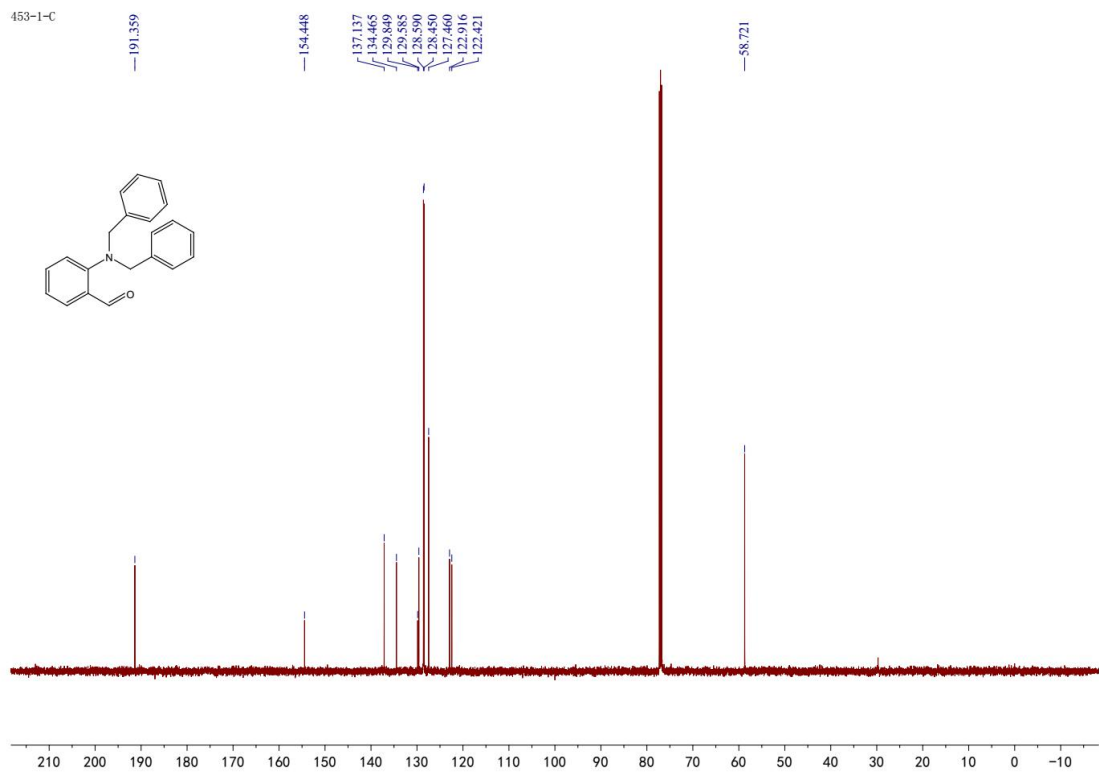



# NMR of 1p

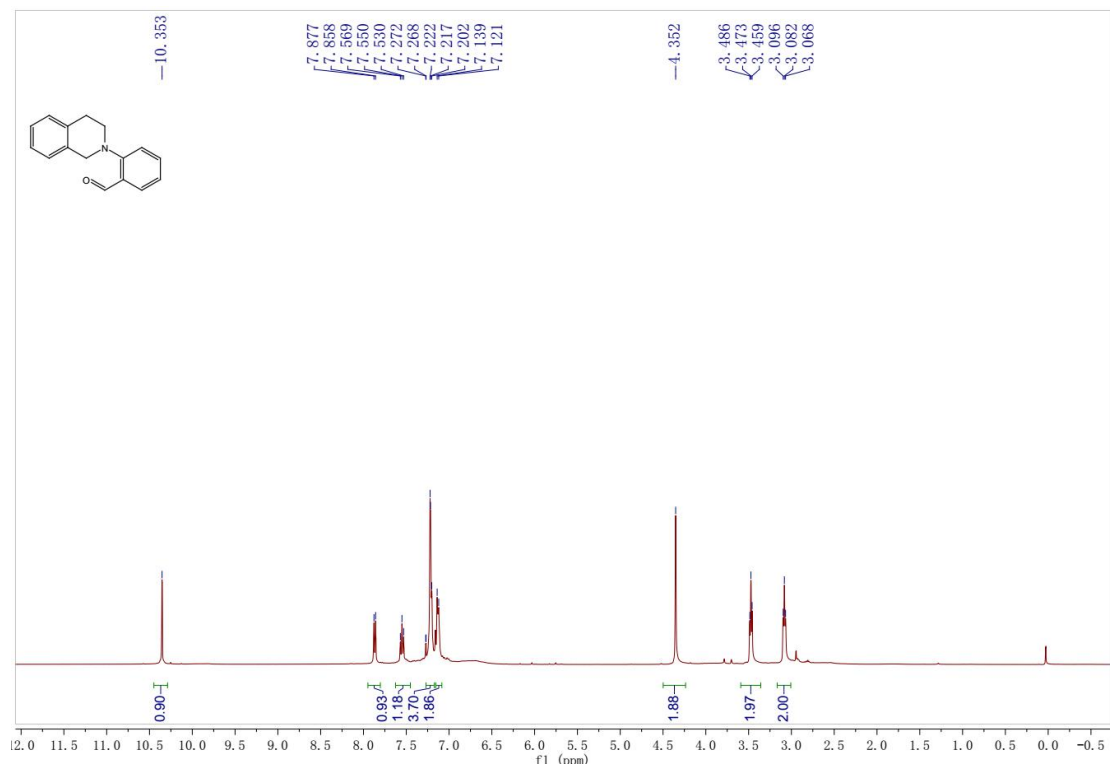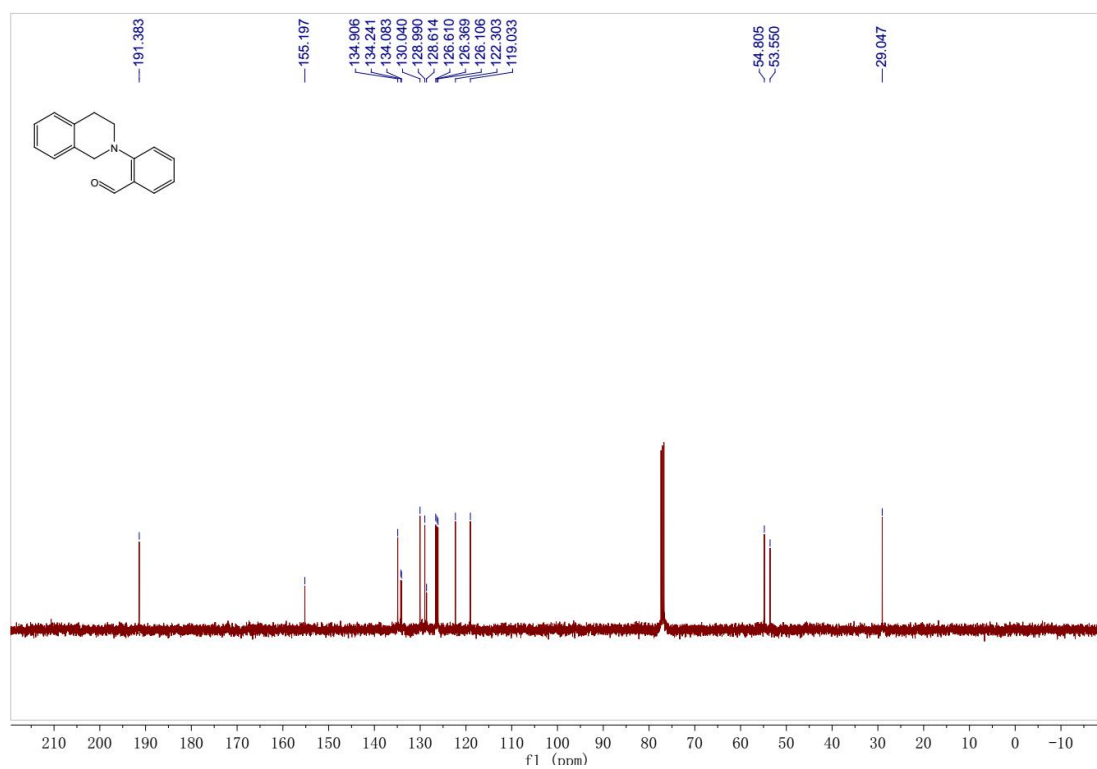

# NMR of 1q

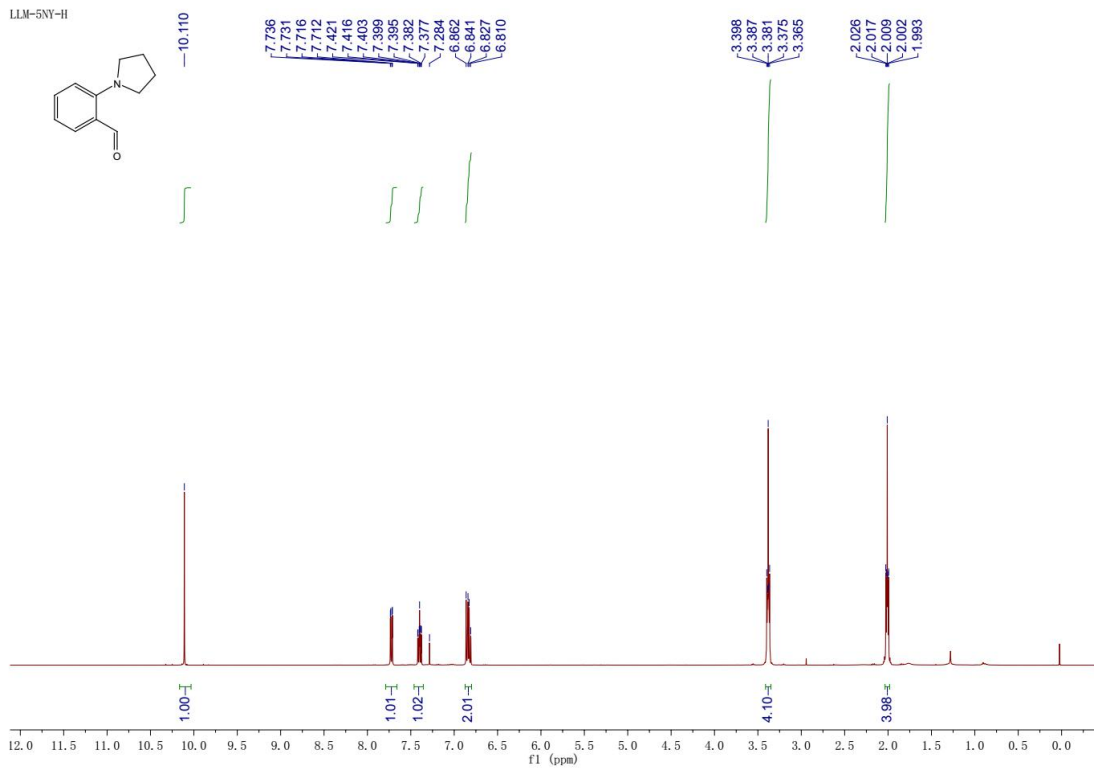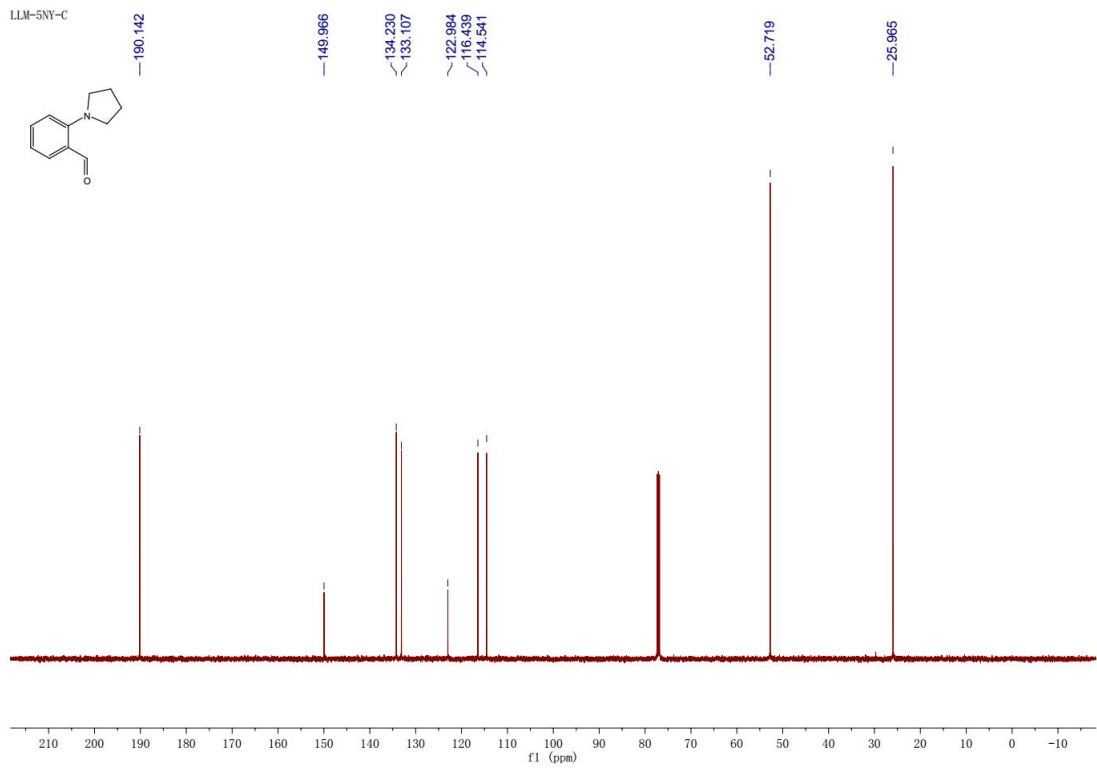

# NMR of 1aa

G449-H

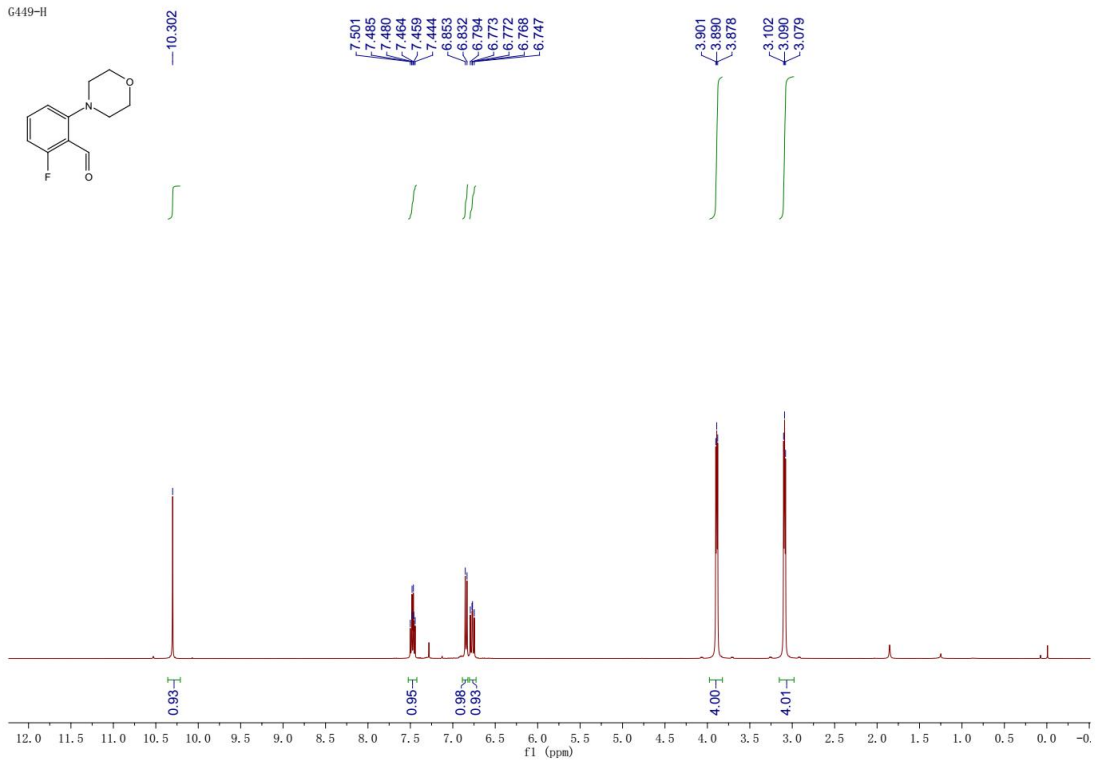

LLM-G449-C

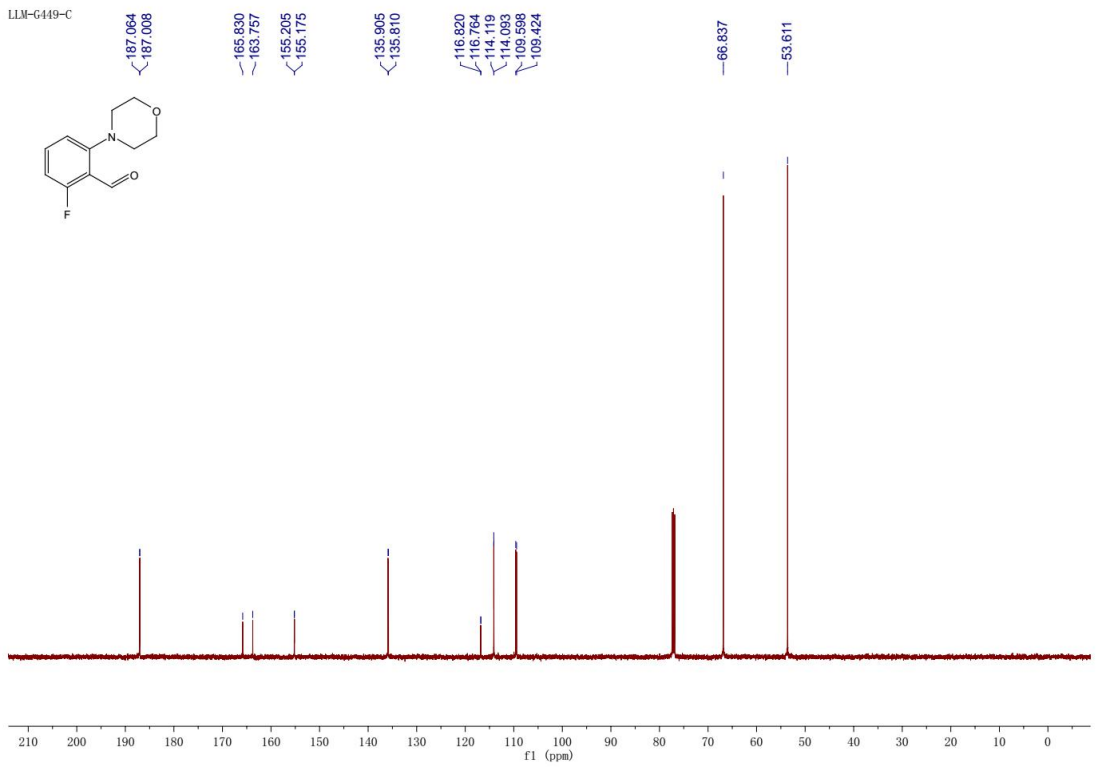

# NMR of 1ab

LLM-3350321-H

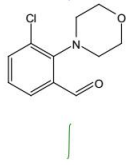

7.754  
7.750  
7.735  
7.731  
7.585  
7.581  
7.575  
7.564  
7.248  
7.228

3.860  
3.849  
3.839  
3.334

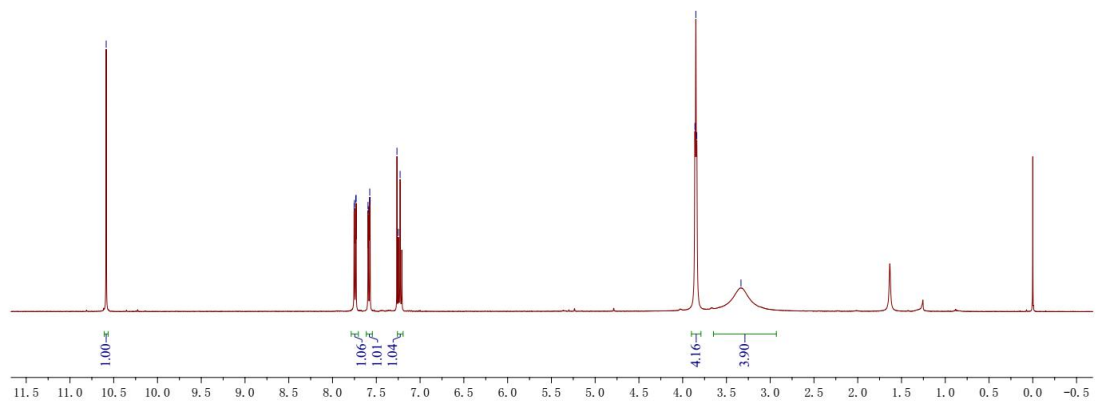

LLM-335-C

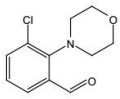

150.261  
136.719  
135.777  
134.092  
127.555  
126.658

67.426  
50.849

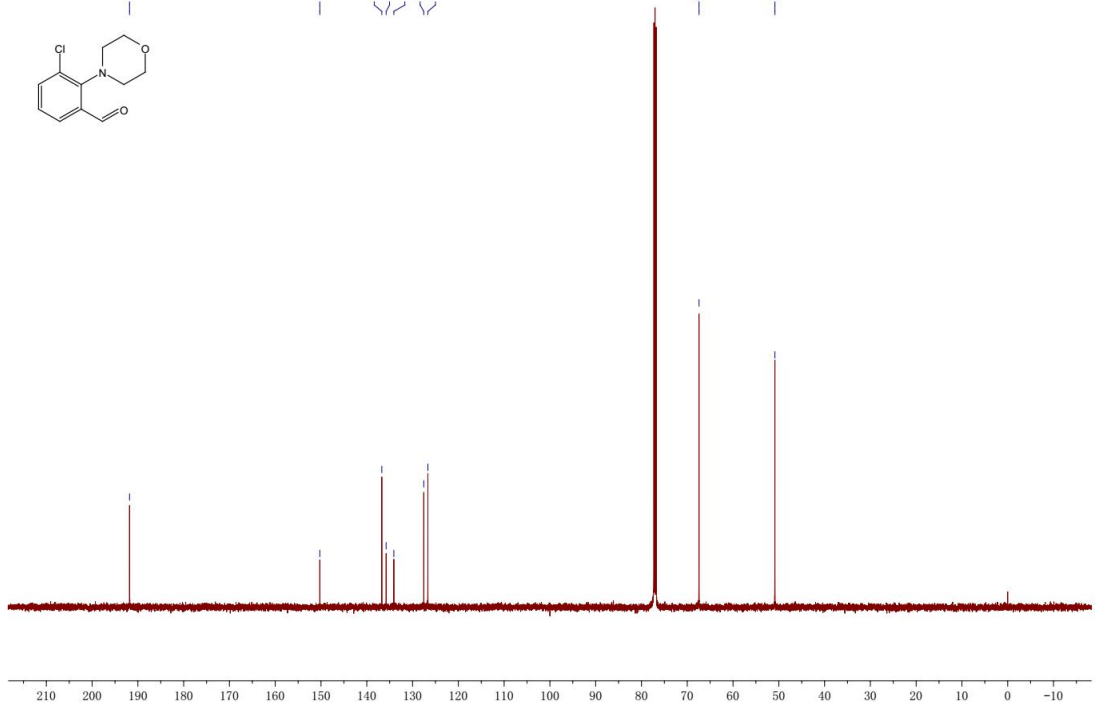

# NMR of 1ac

G451-0319-H

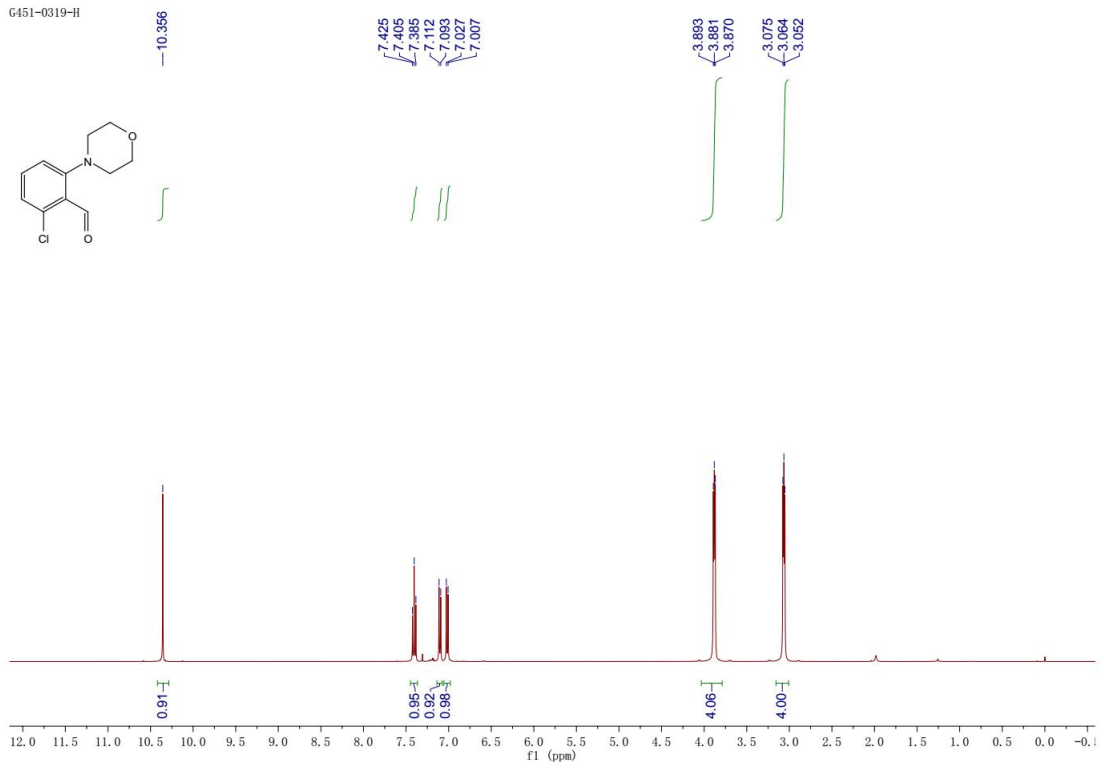

LLM-G451-C

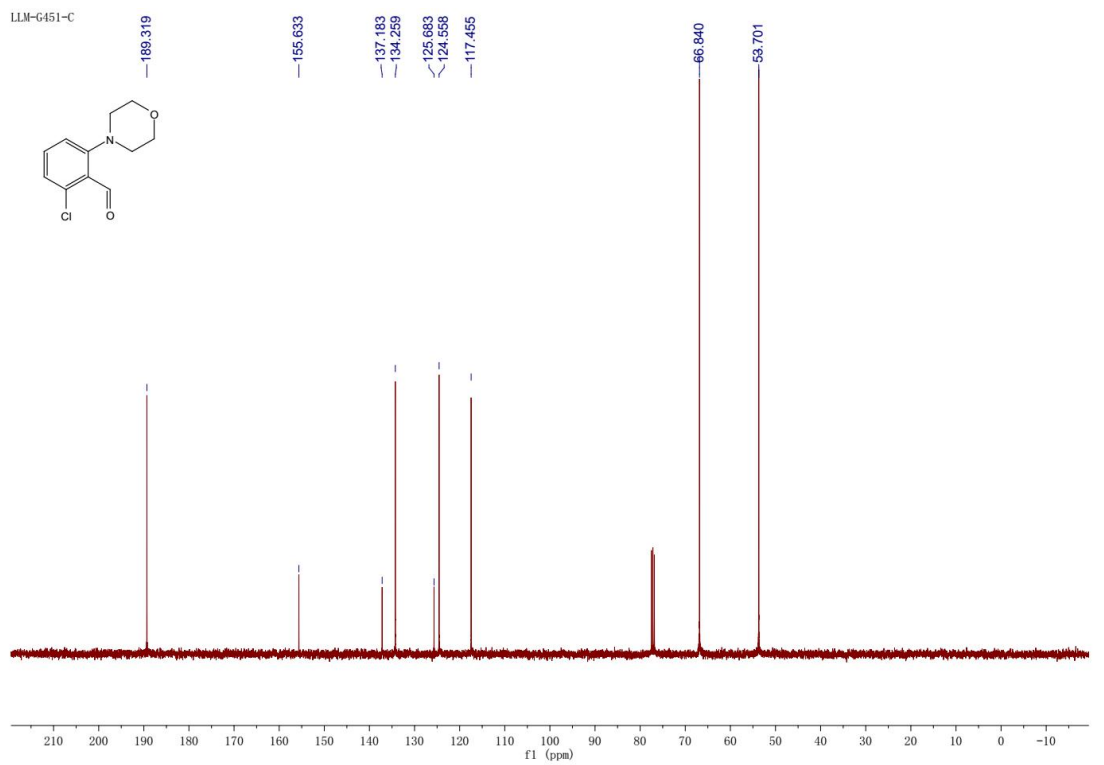

# NMR of 1ad

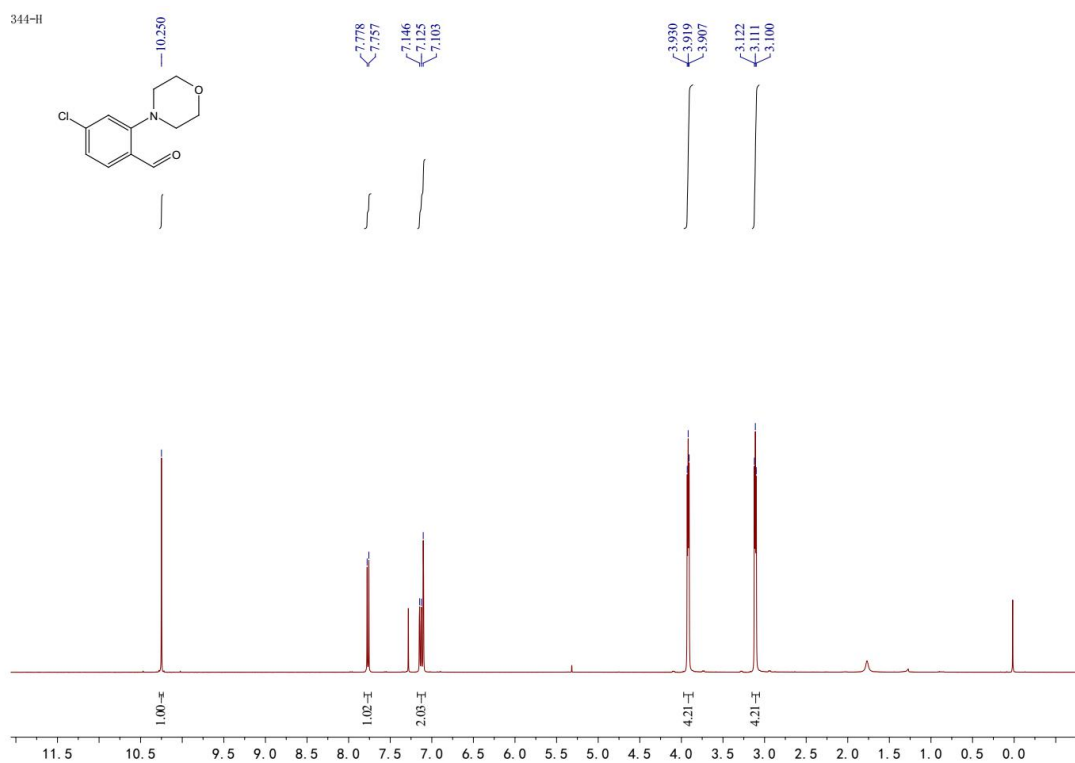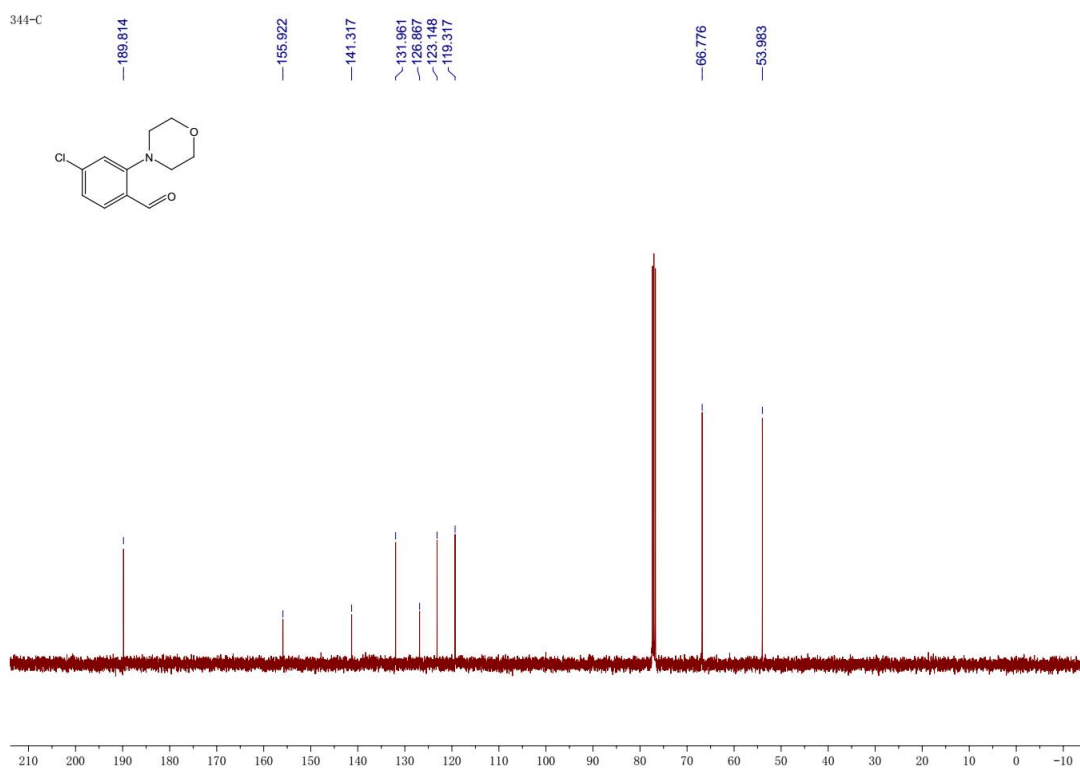

# NMR of 1ae

A53-2H

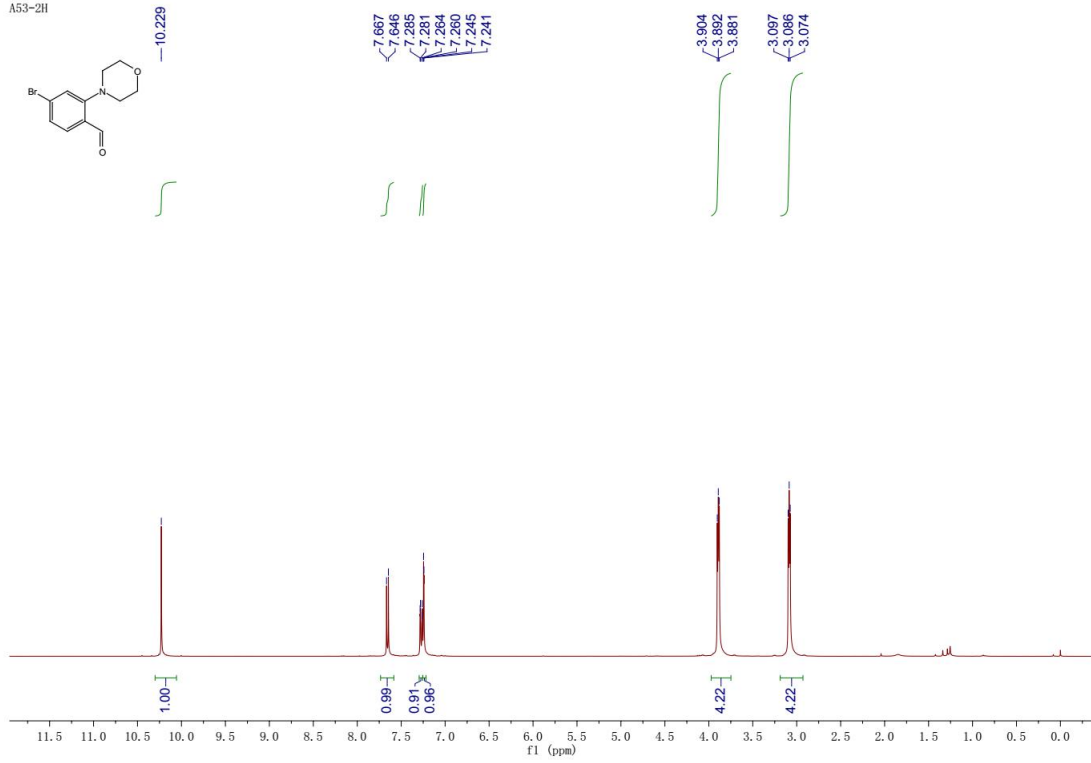

LLM-A53-2-C

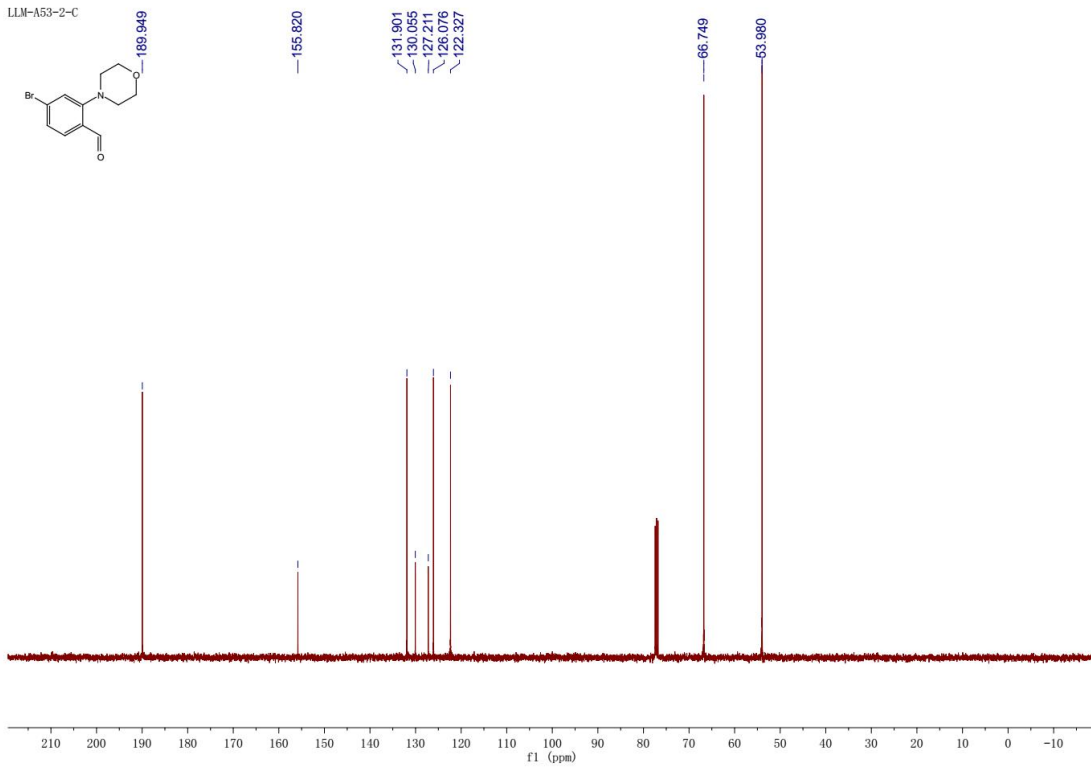

# NMR of 1af

A54-H

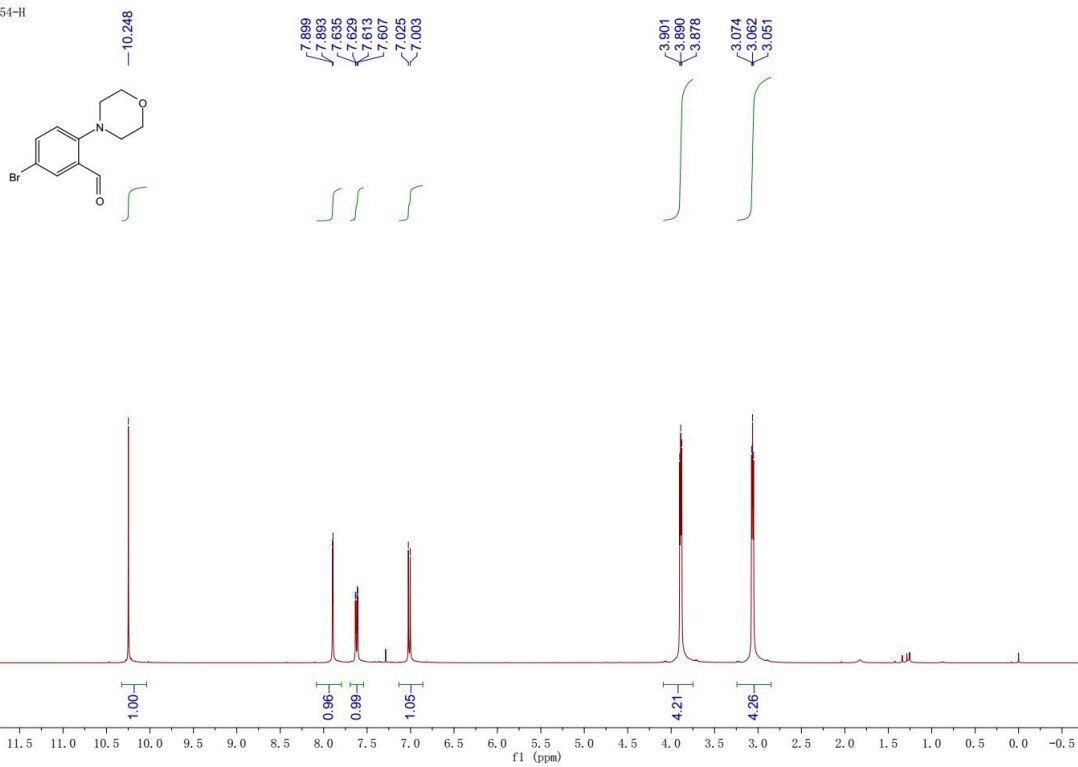

LLM-A54-C

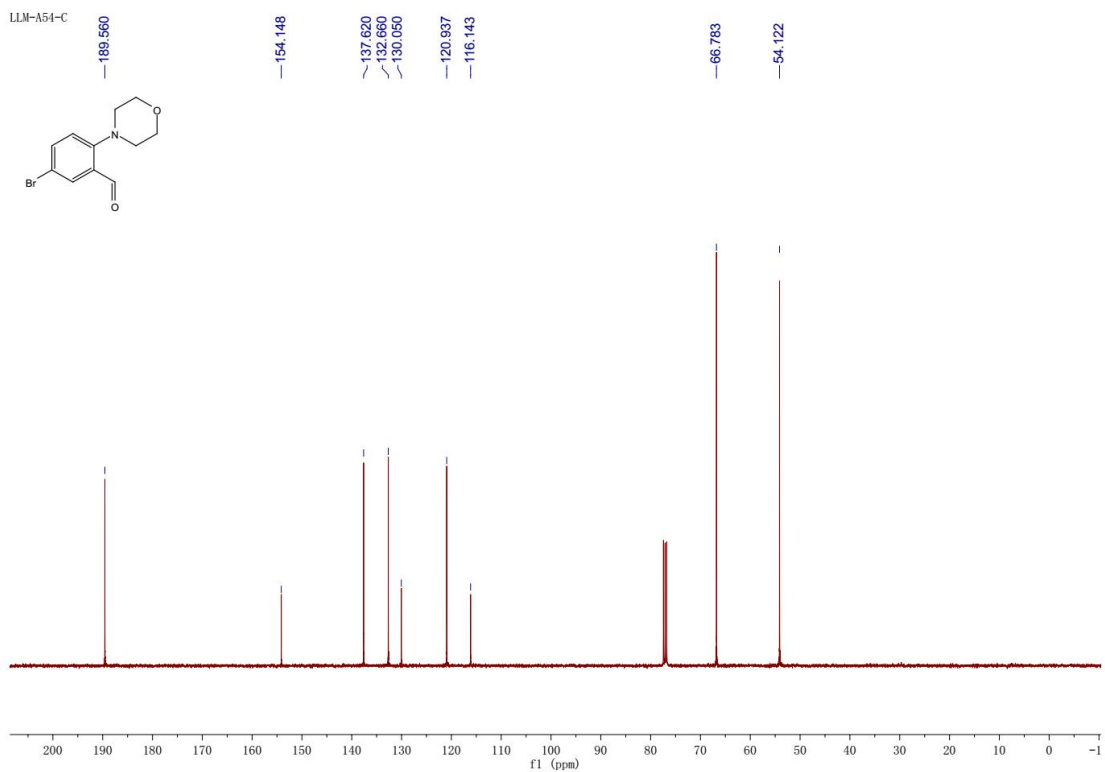



# NMR of 1ag

LLM-G437-H

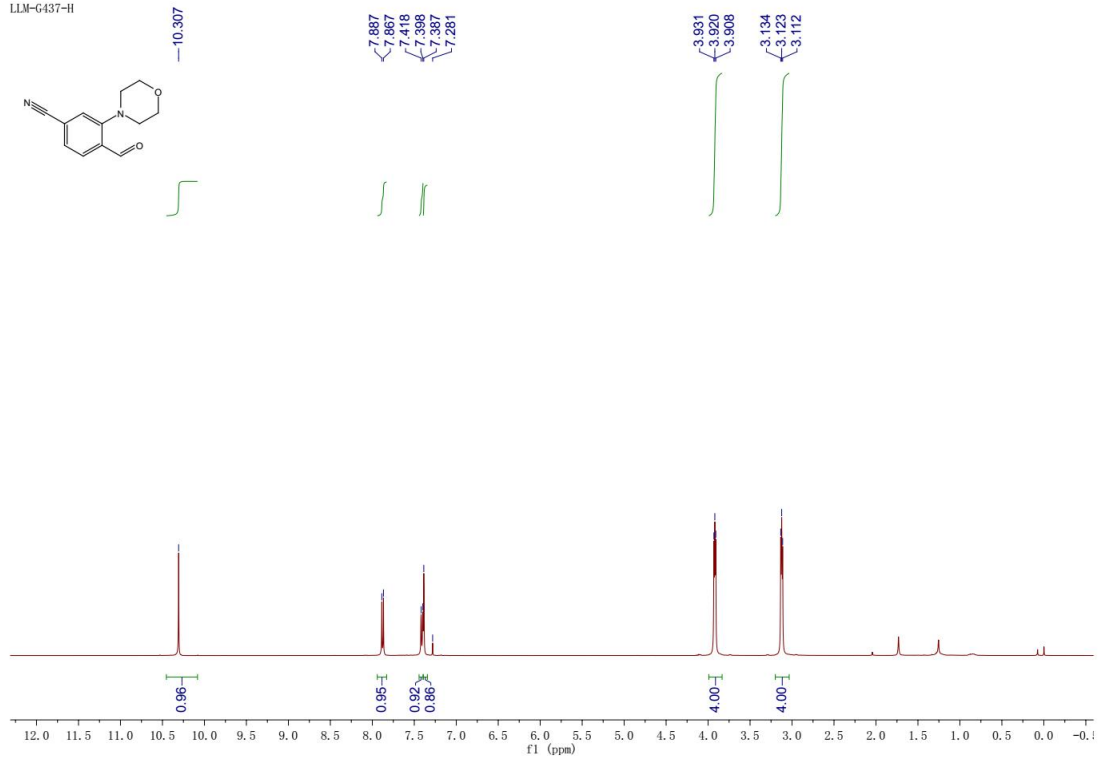

LLM-G432-C

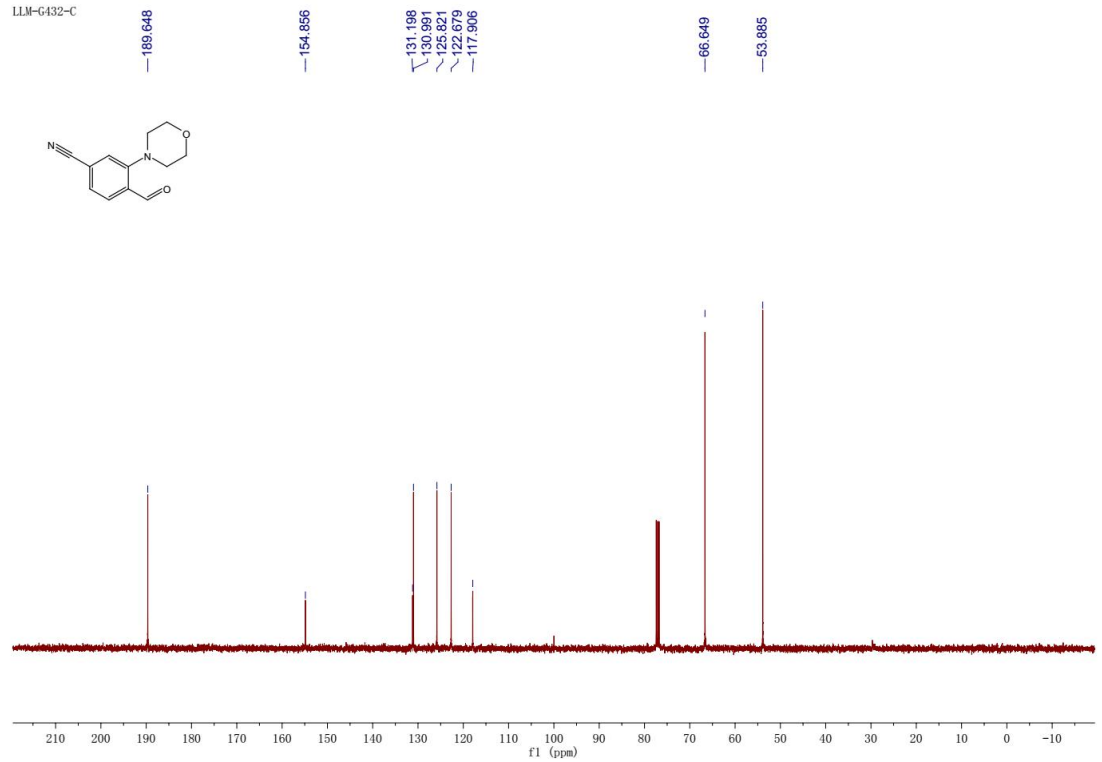

# NMR of 1ah

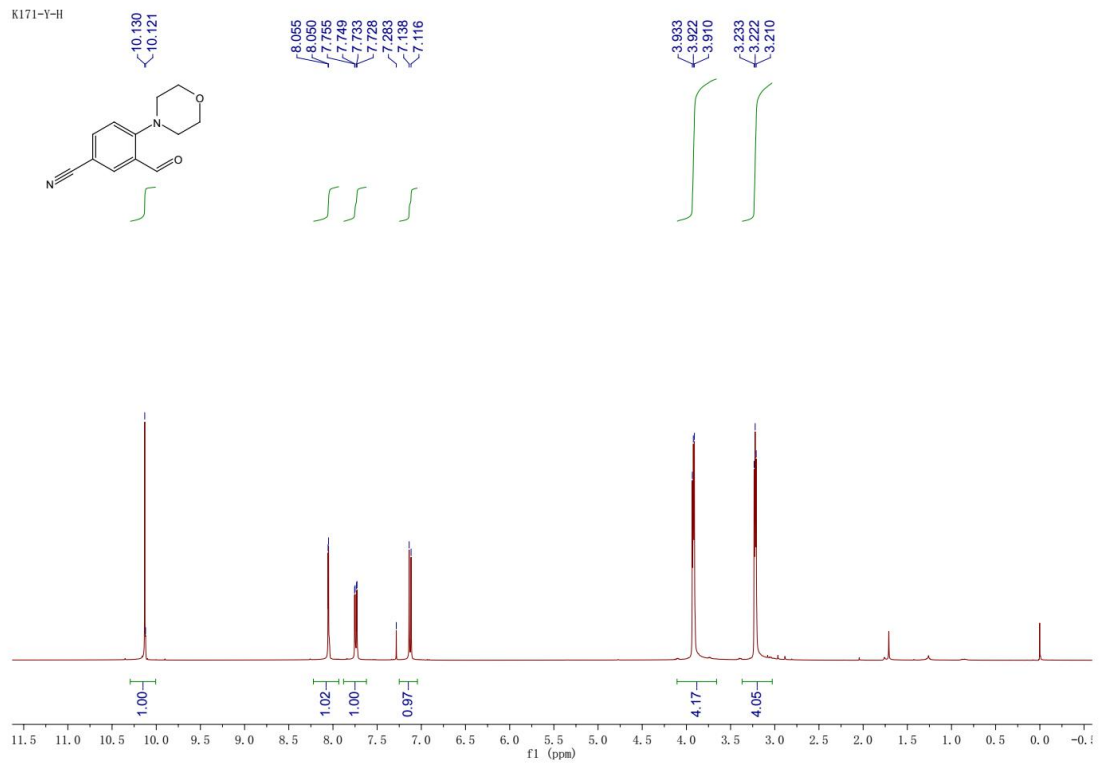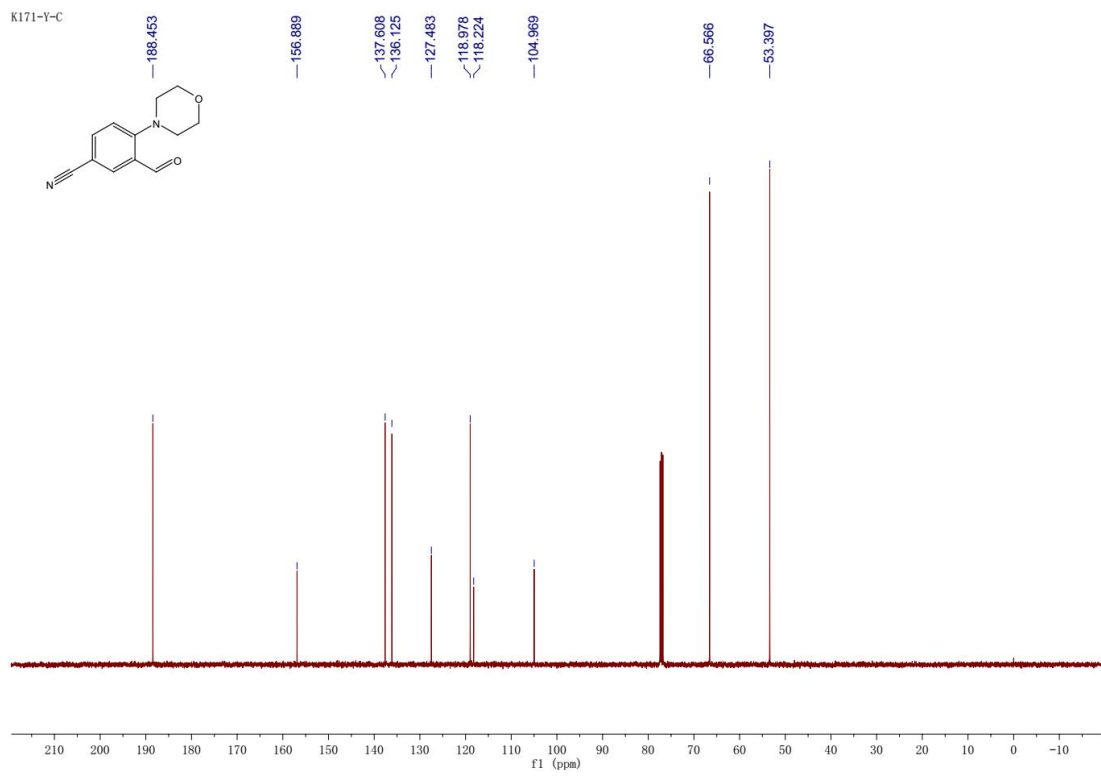

# NMR of 1ai

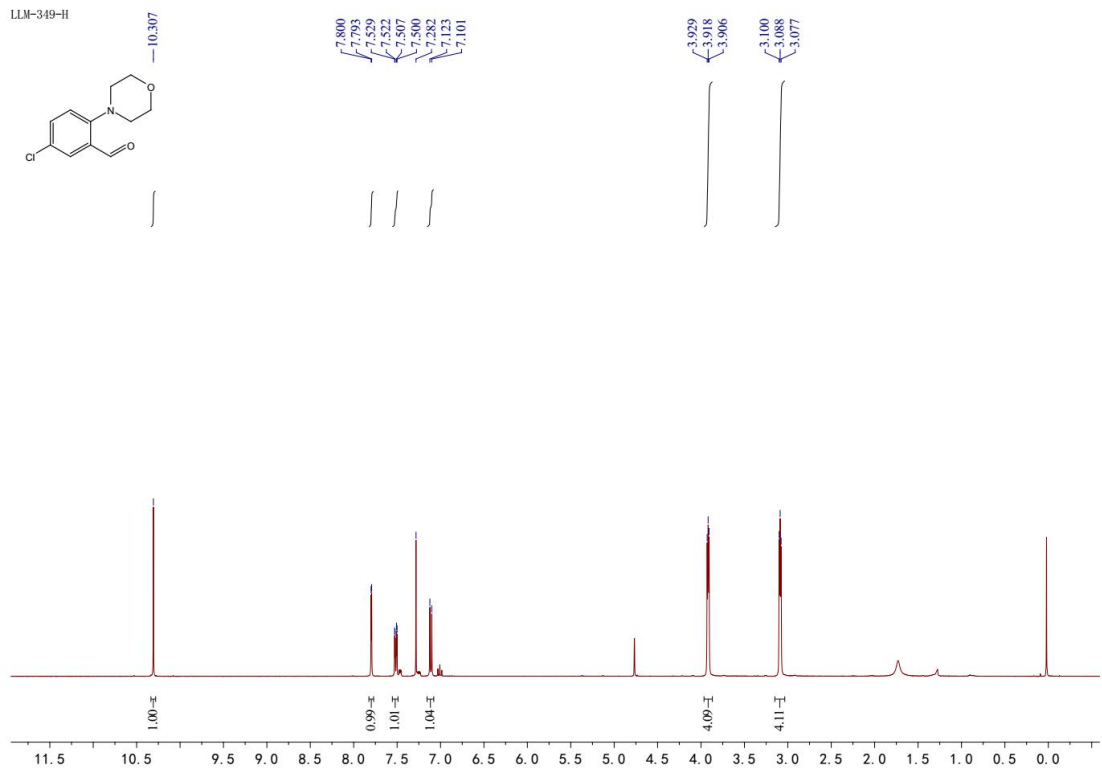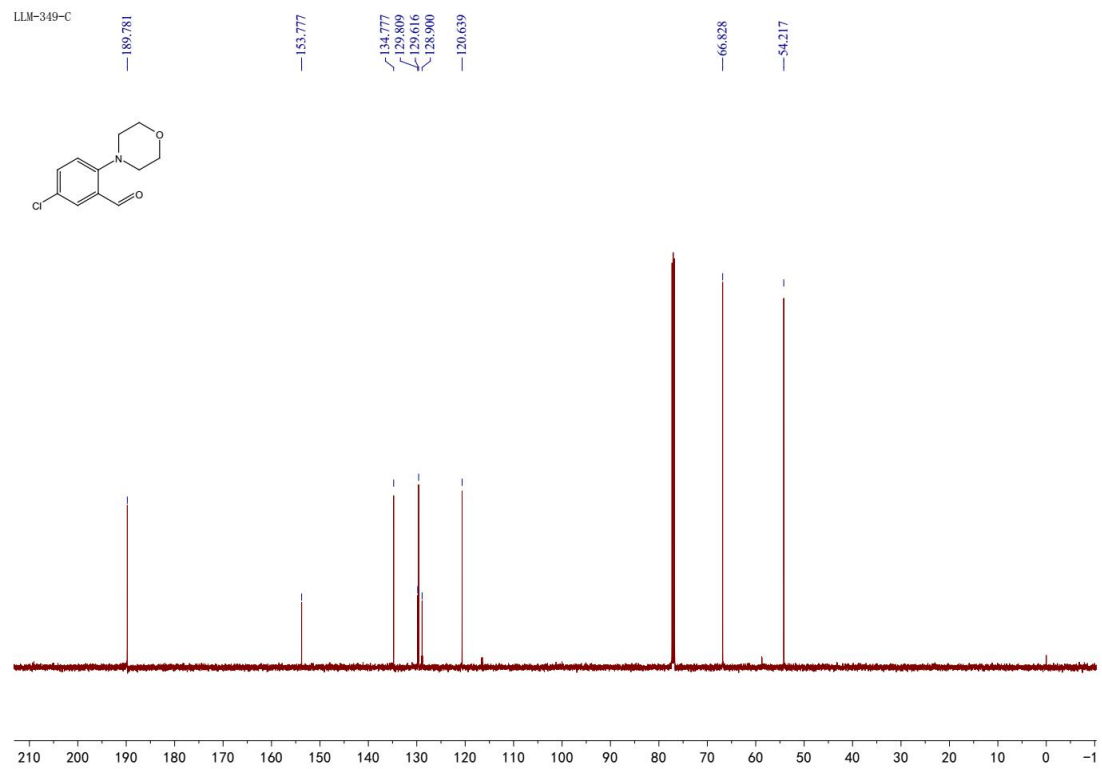

# NMR of 1aj

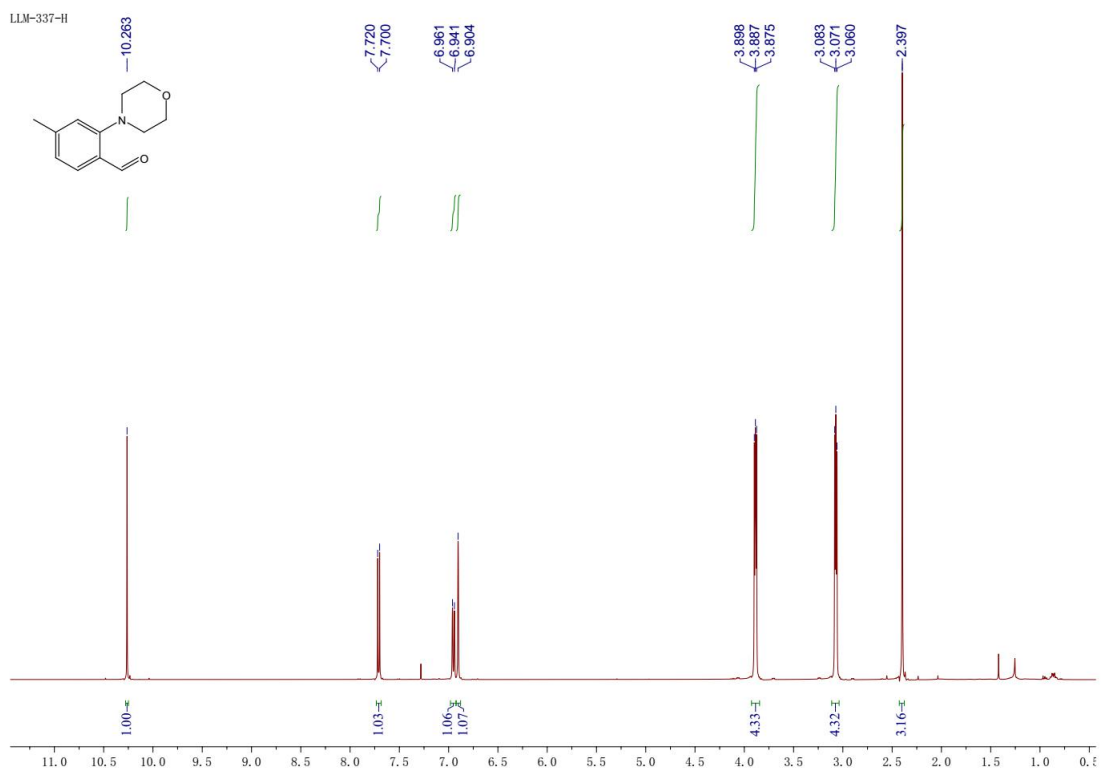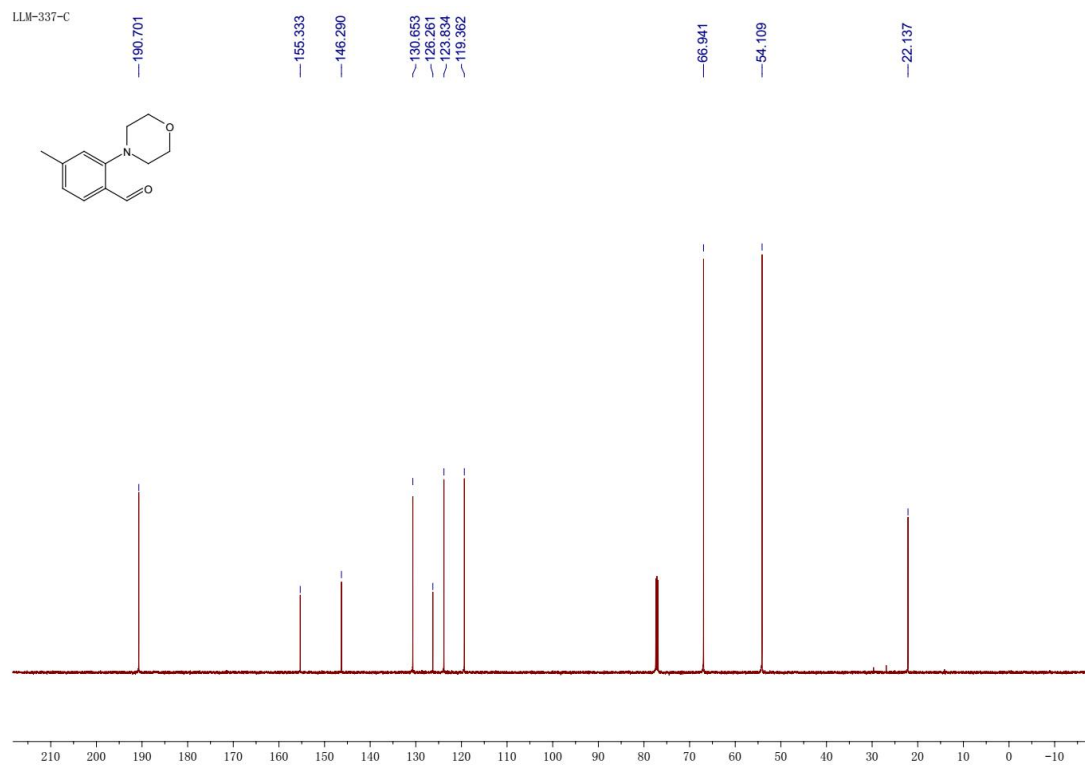

# NMR of 1ak

G481-H

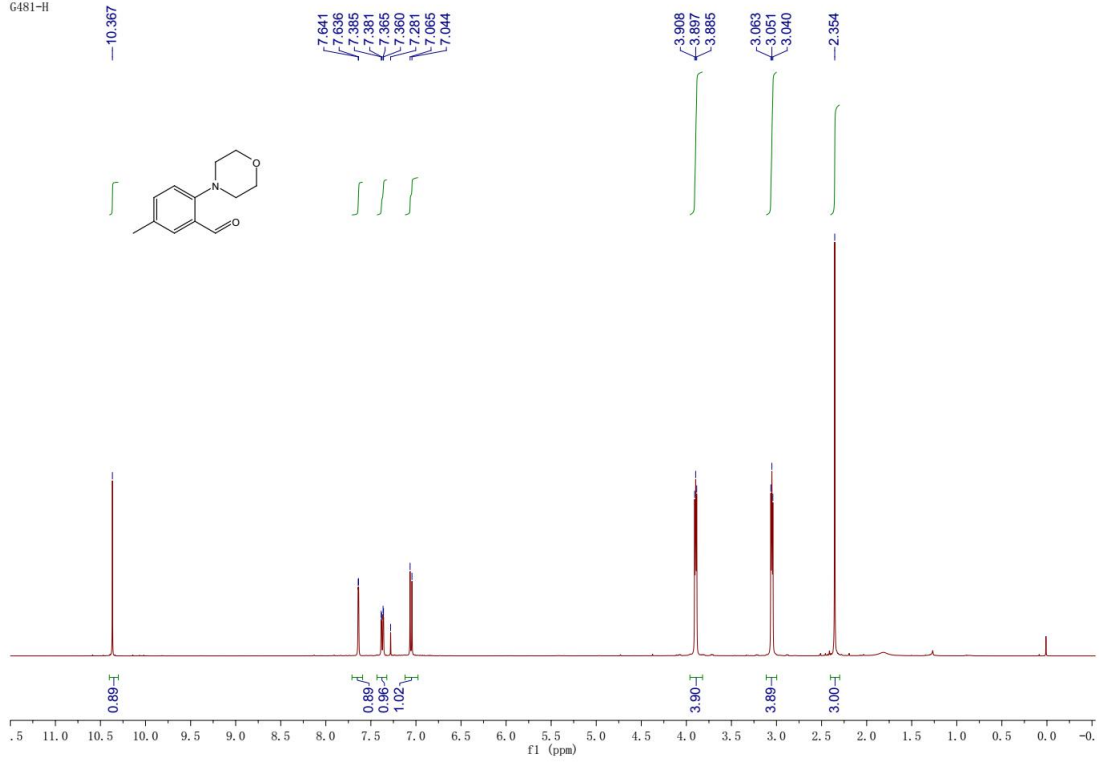

G488-C

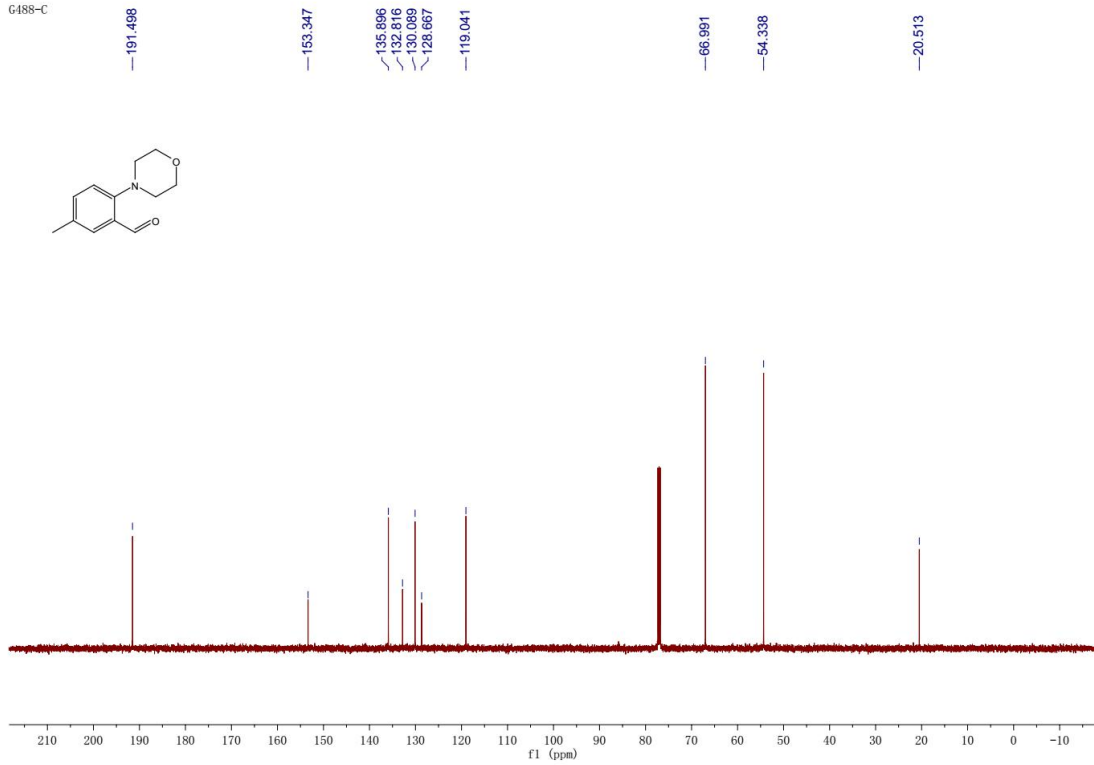

# NMR of 1aI

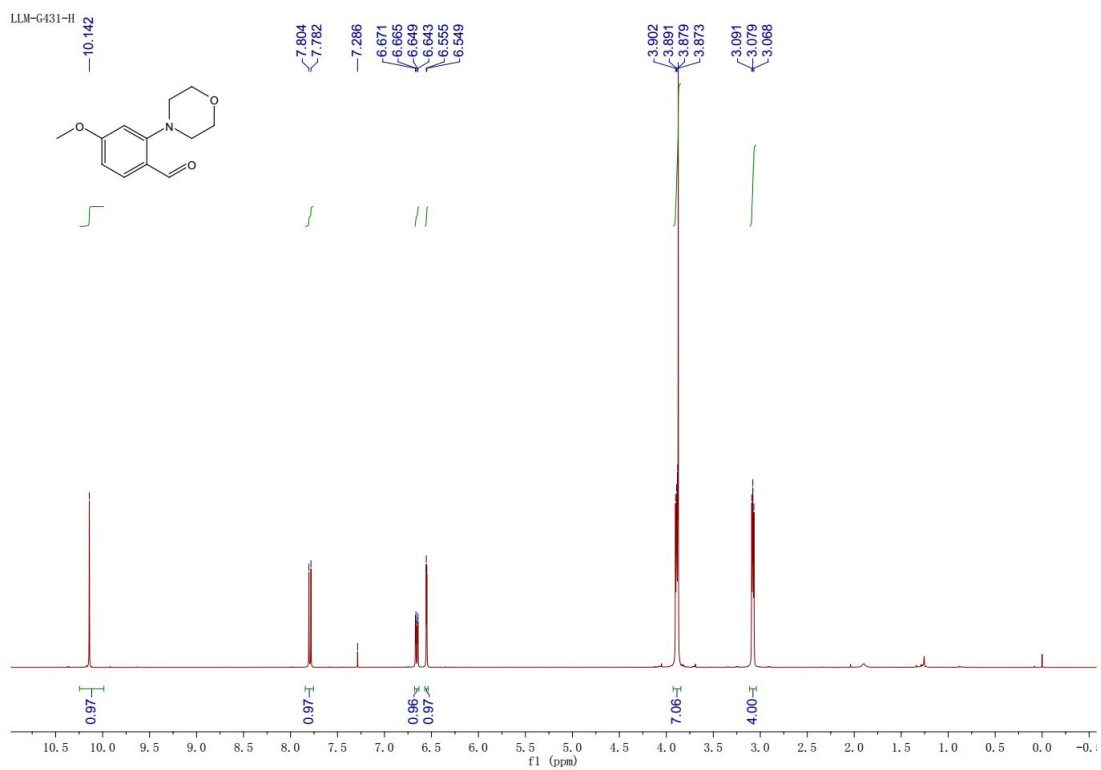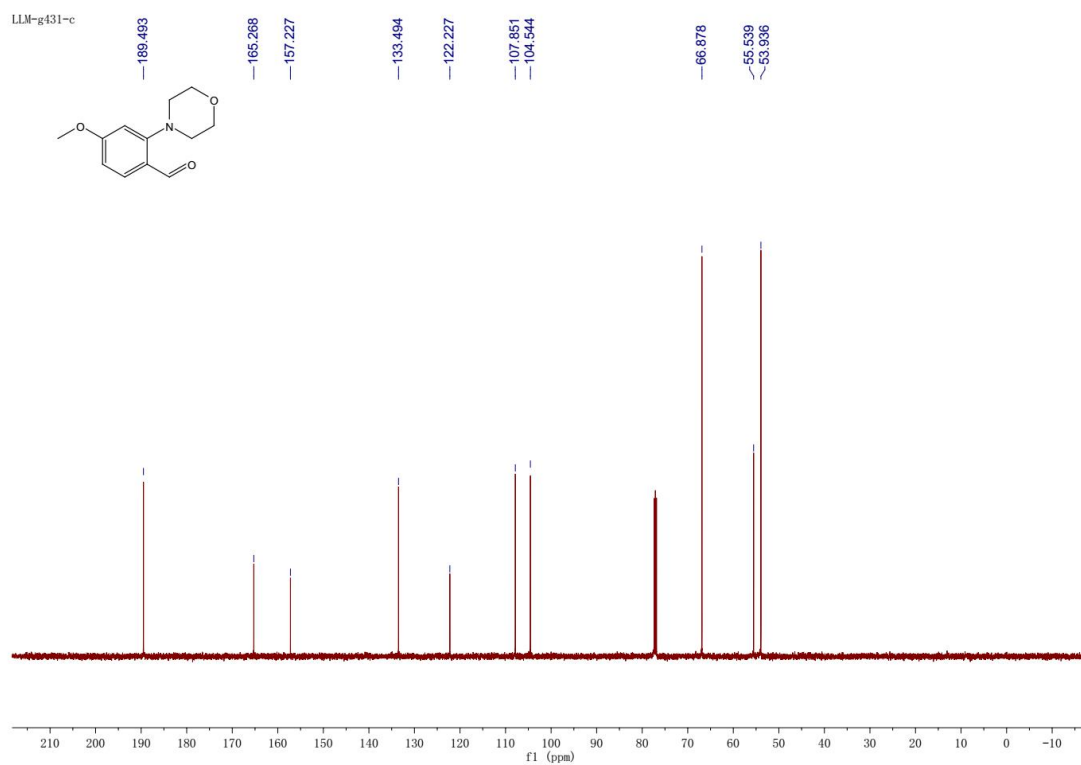

# NMR of 1am

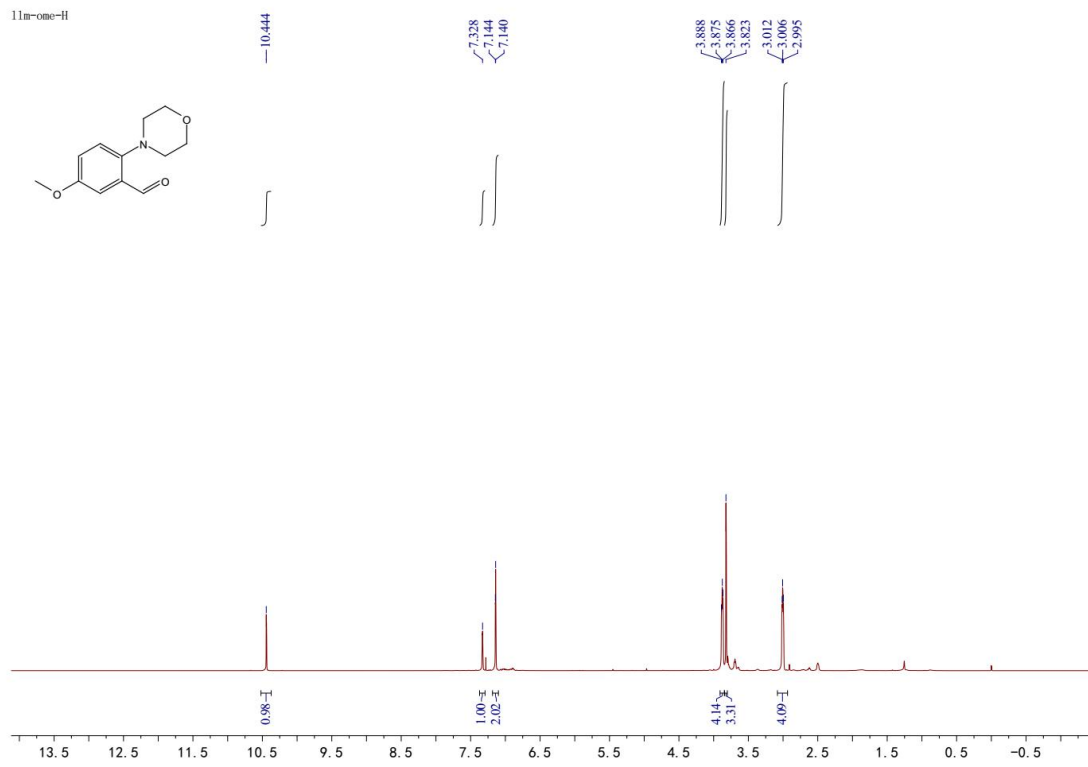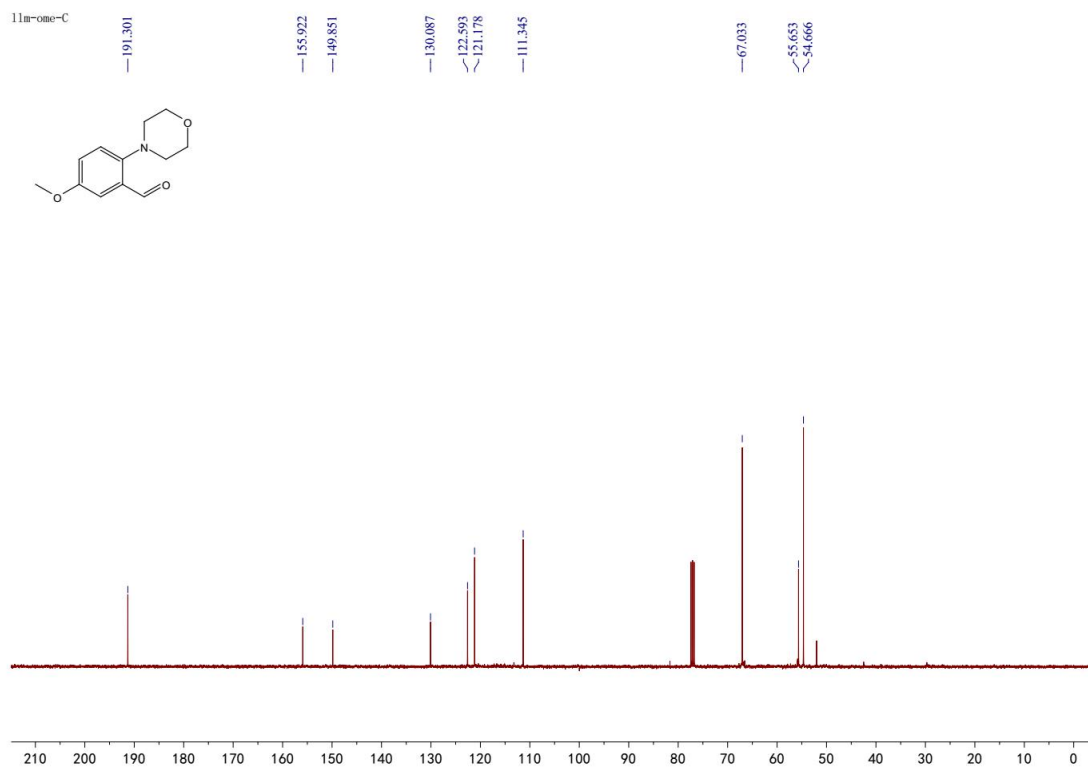

# NMR of 1an

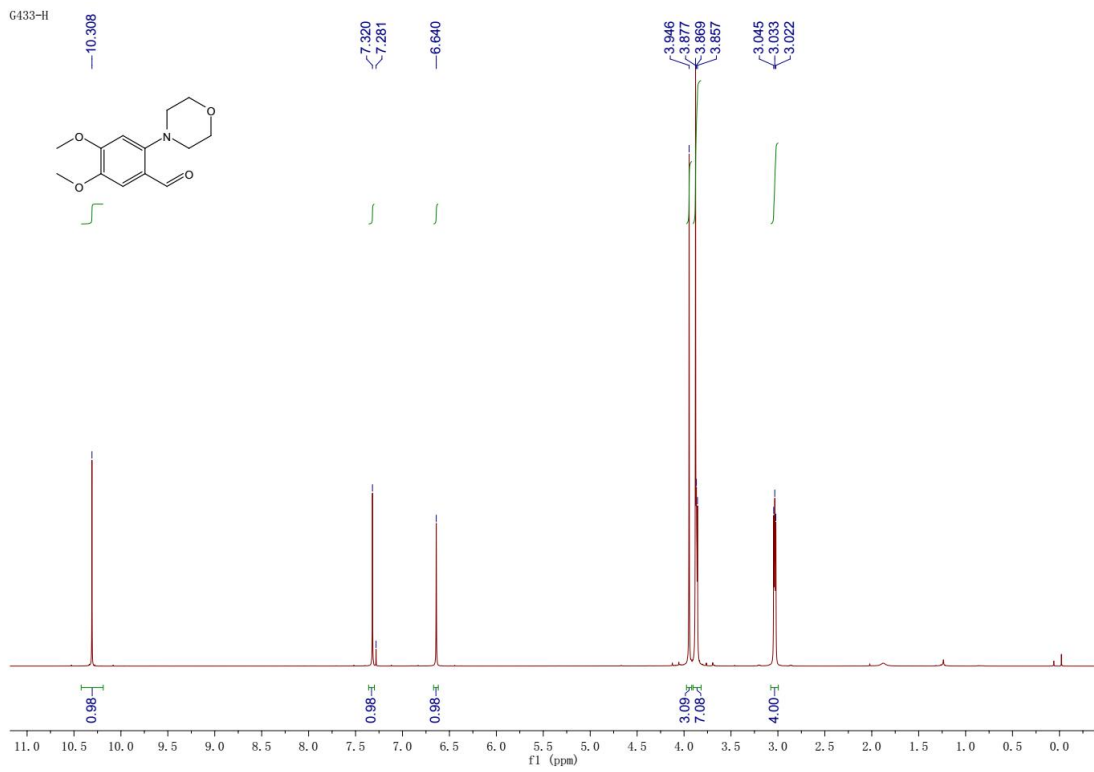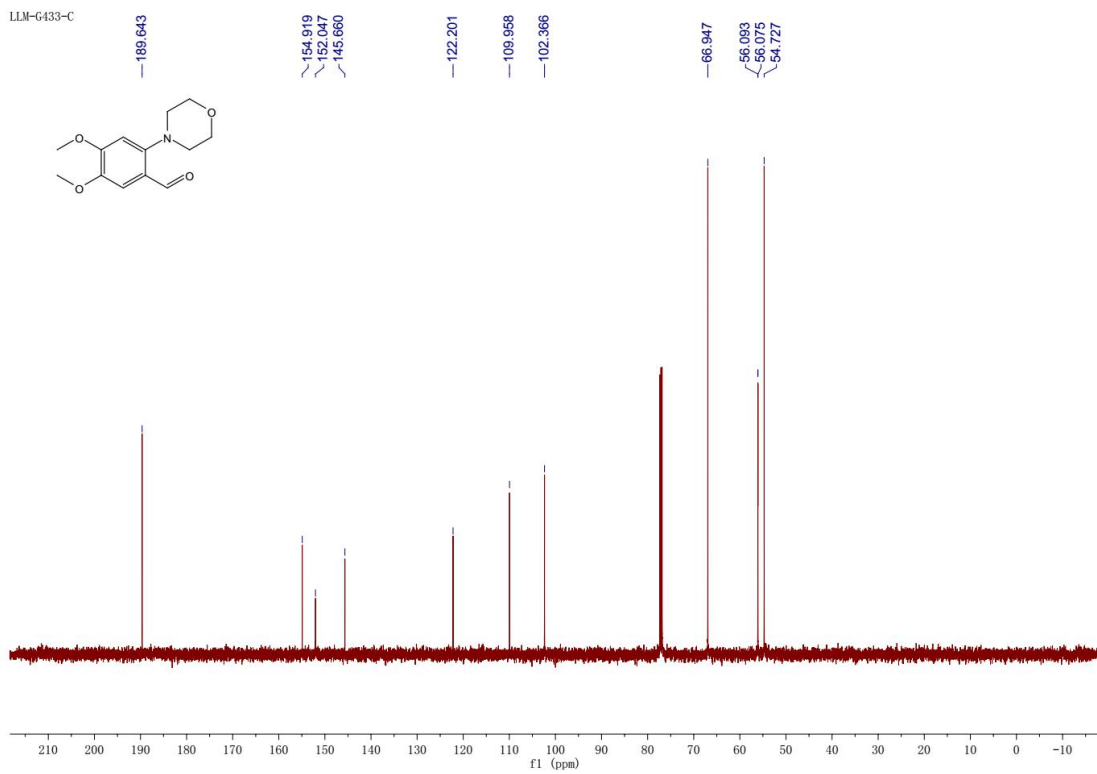



# NMR of 1ao

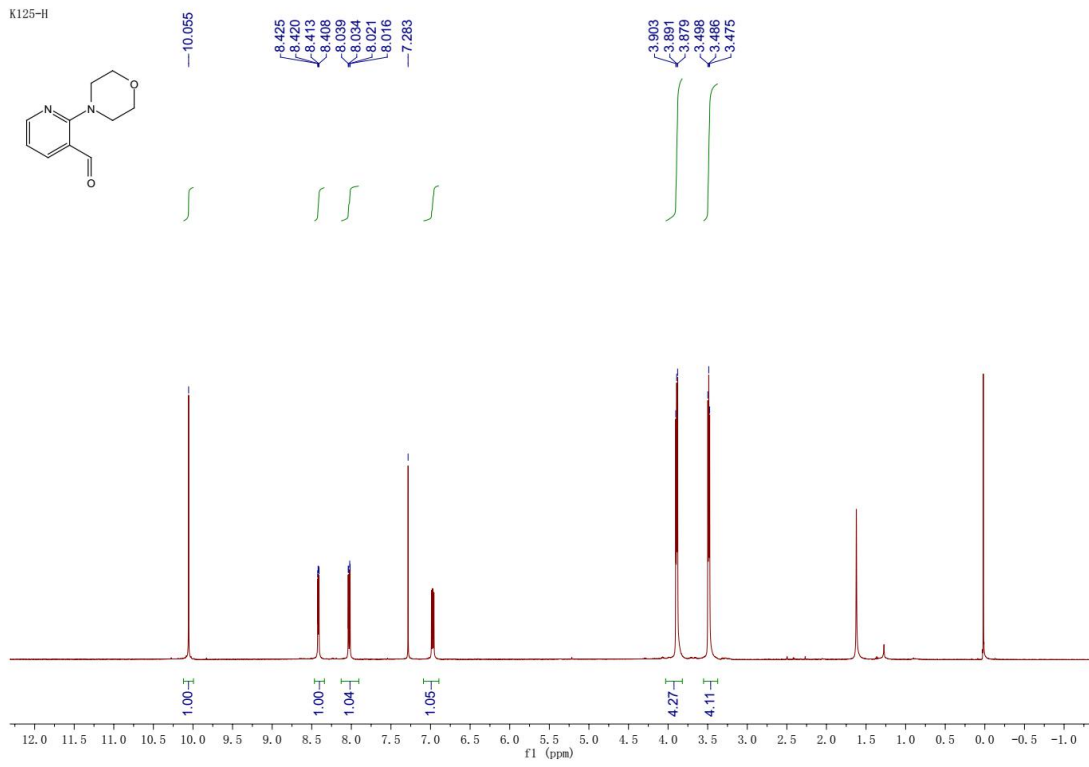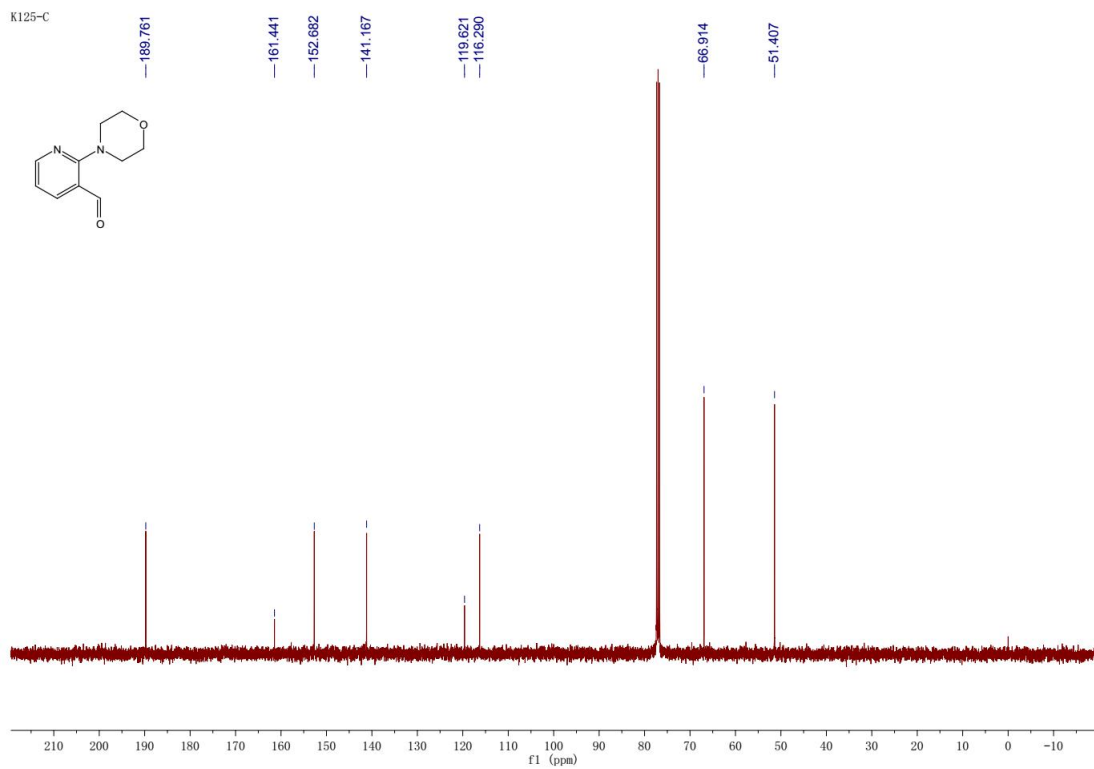

# NMR of 1ap

LLM-A51-1-H-2

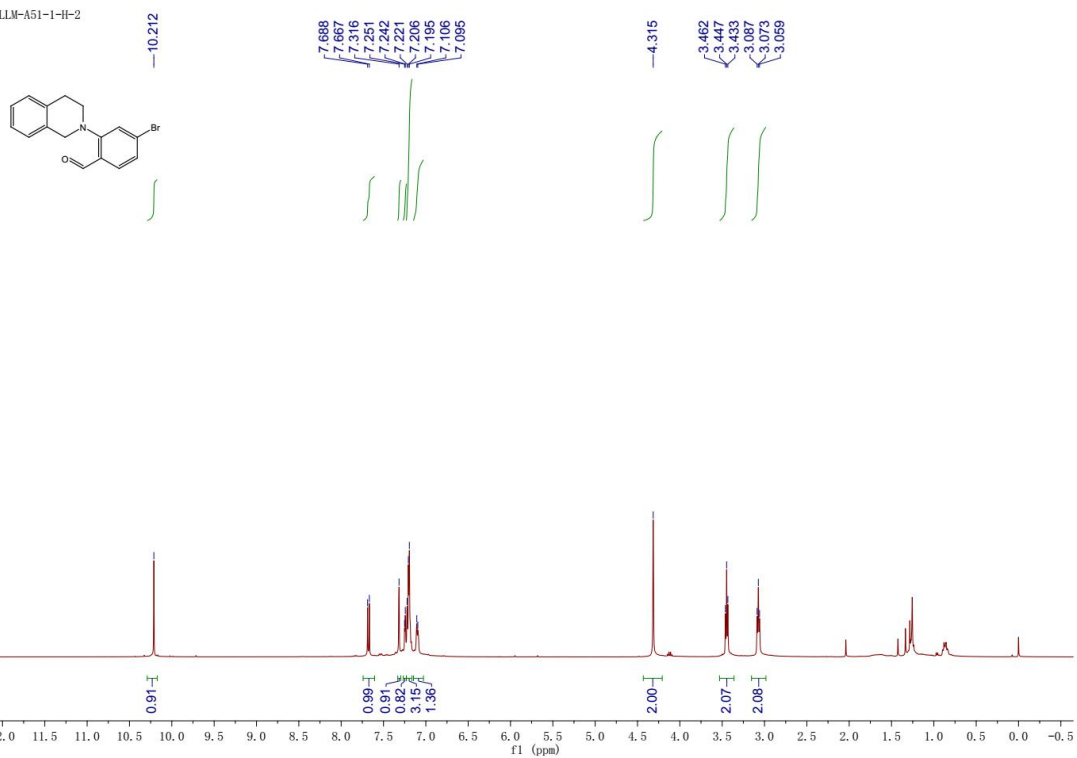

LLM-A51-1-C

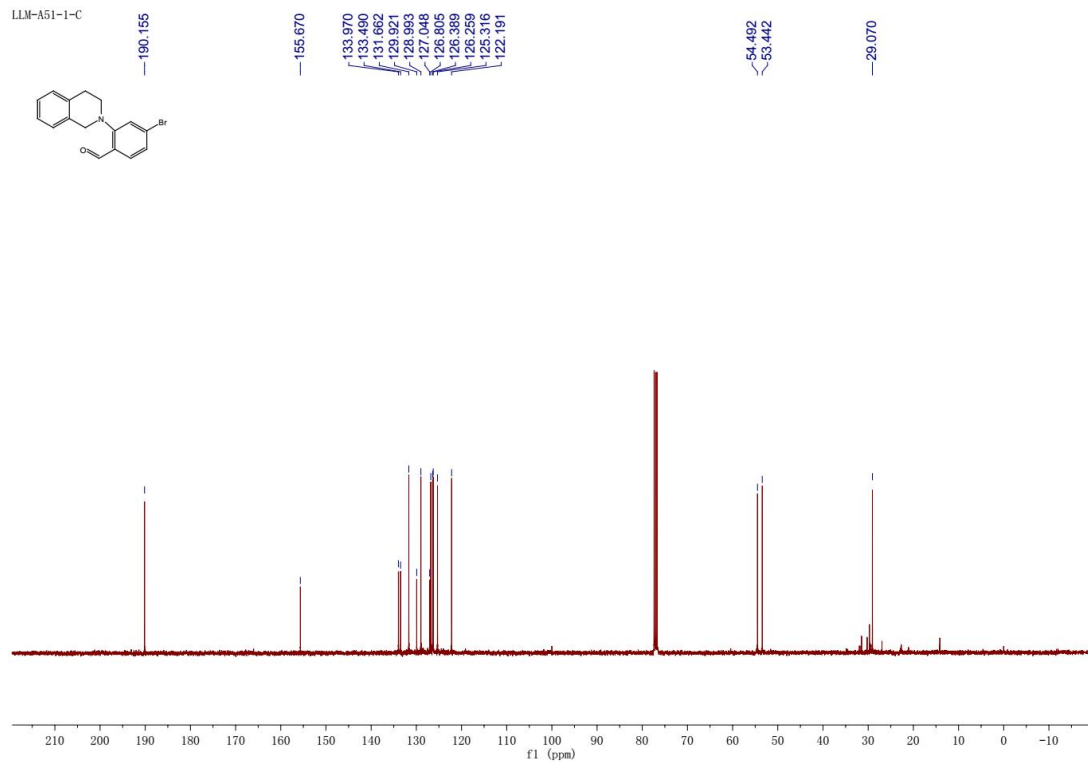

# NMR of 1aq

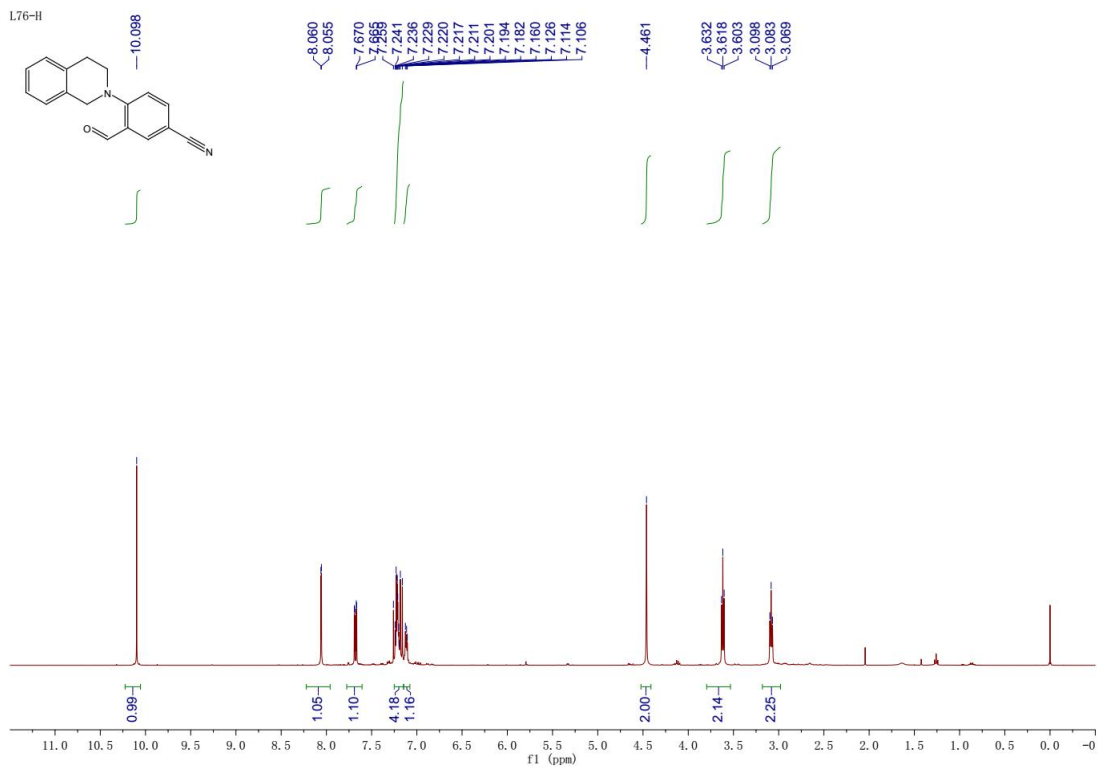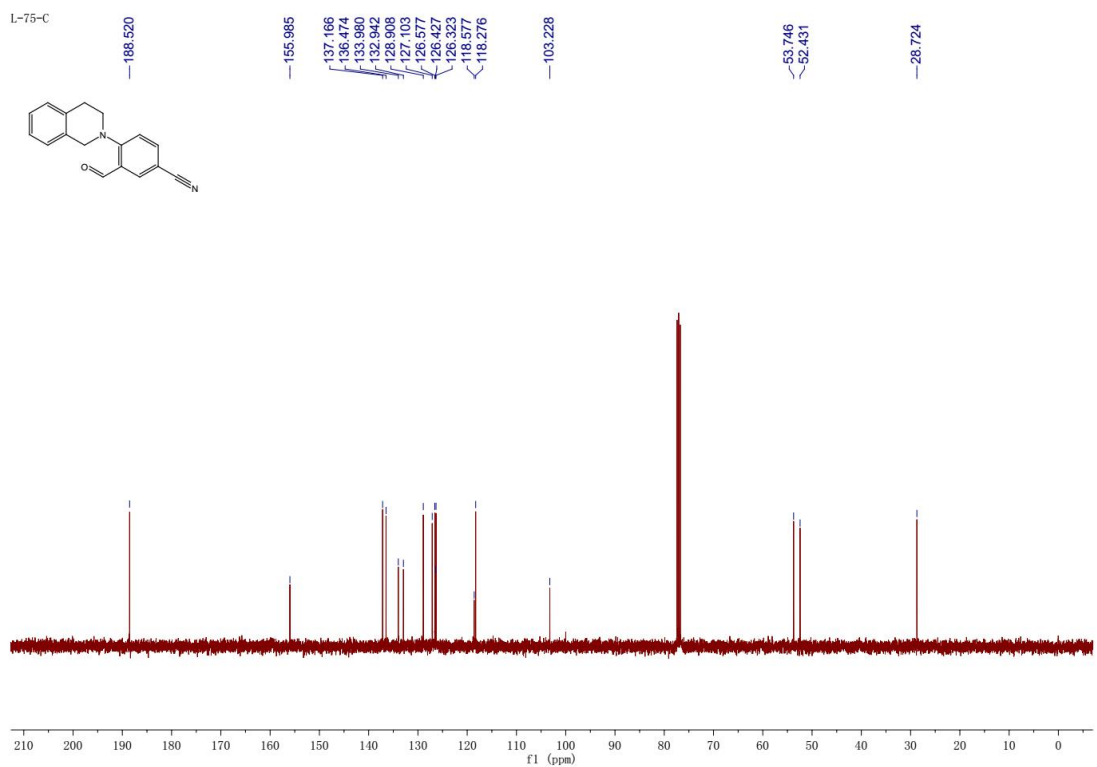

# NMR of 1ar

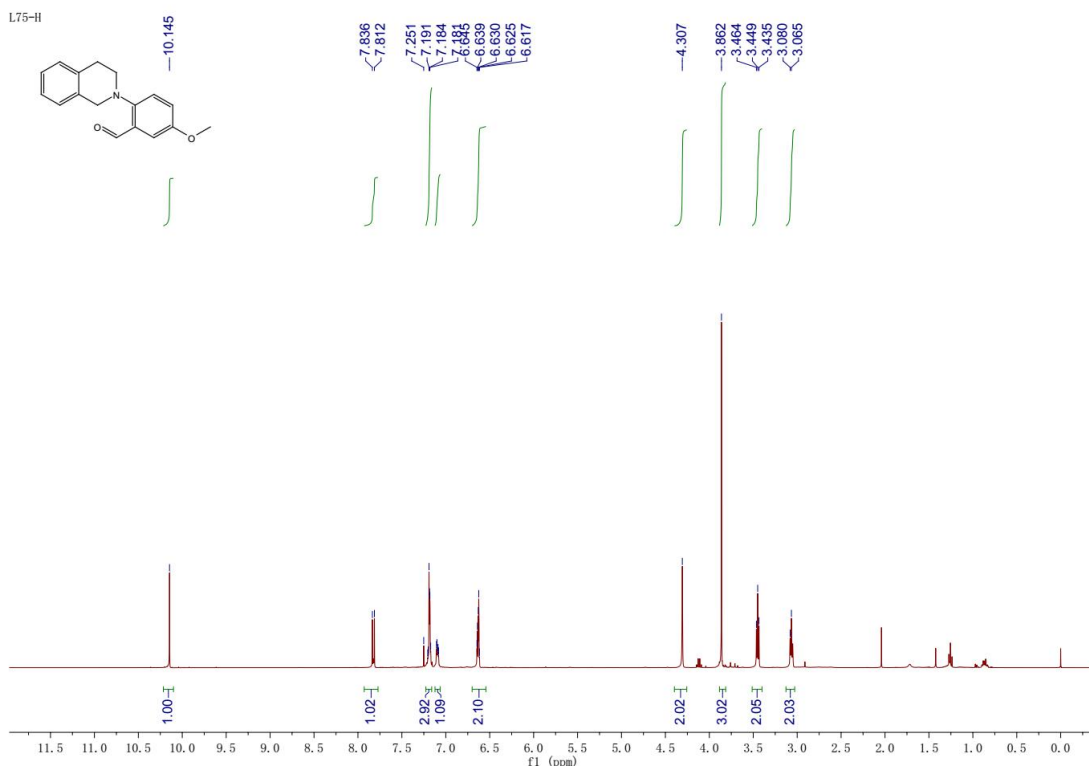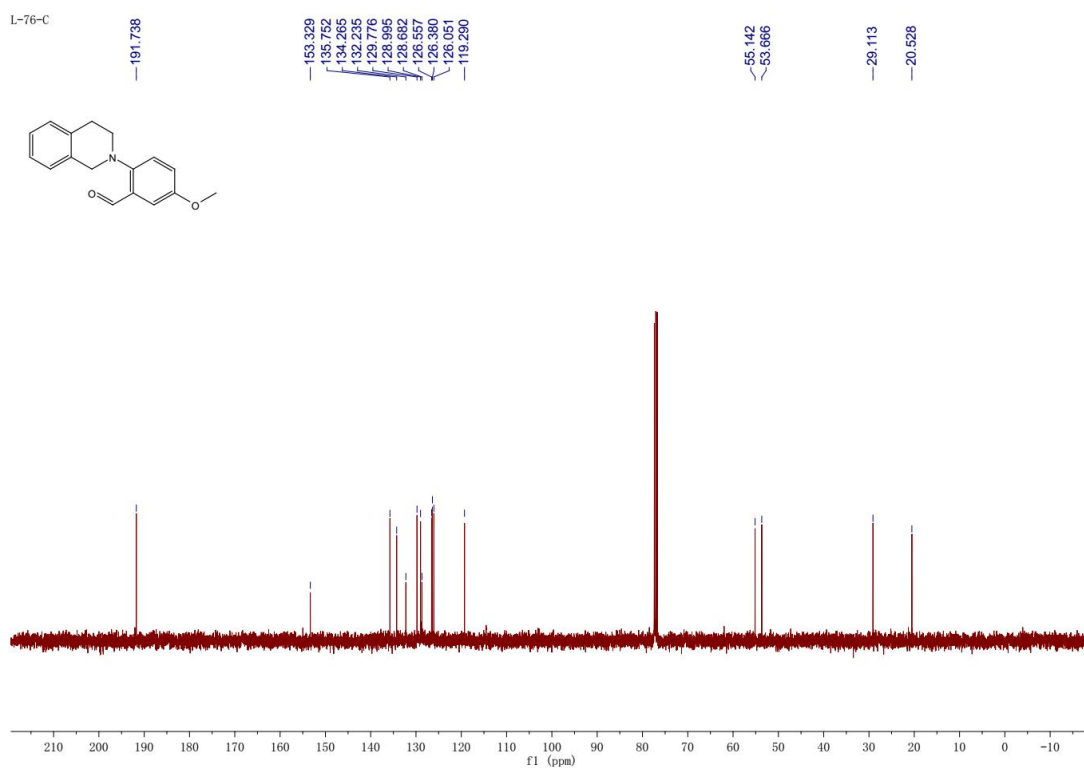

# NMR of 1ba

G-447

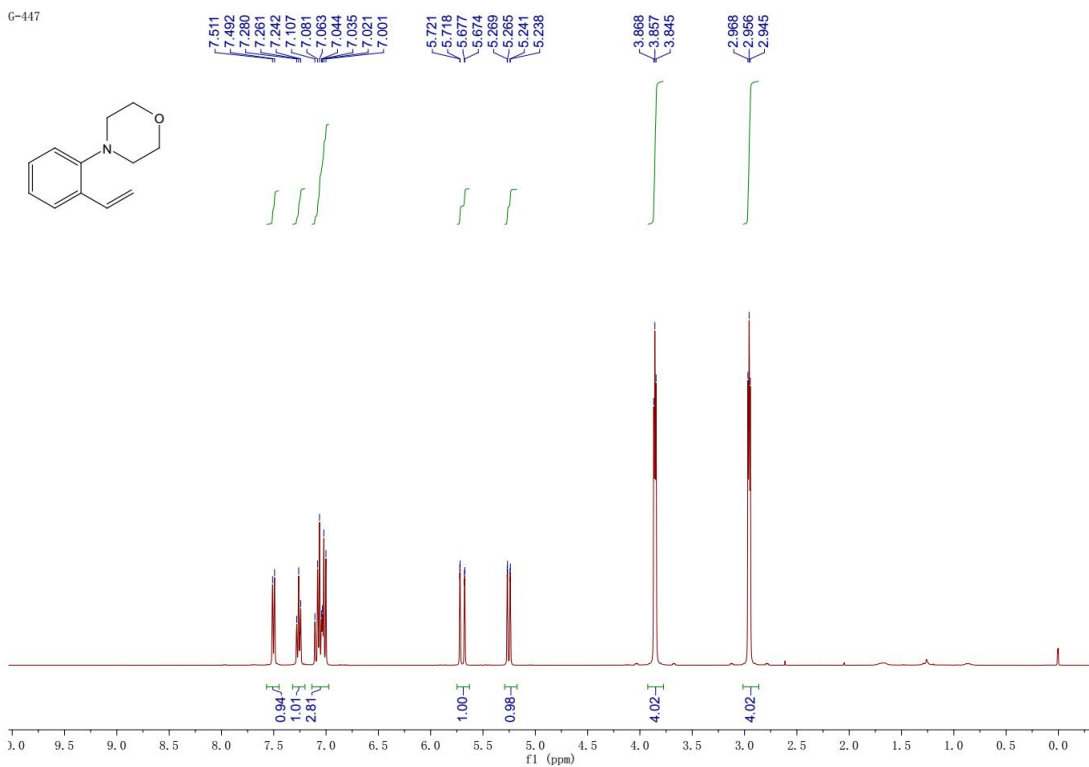

K102-C

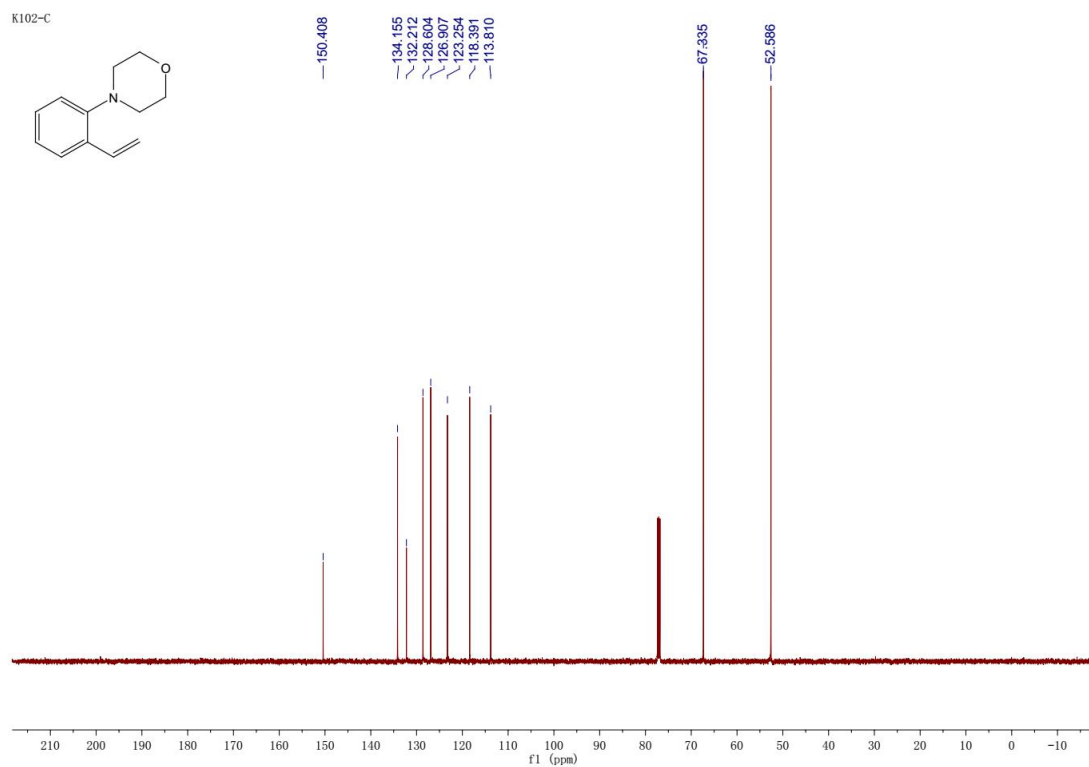

### NMR of 1bb

G469-Y-H

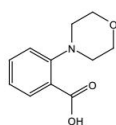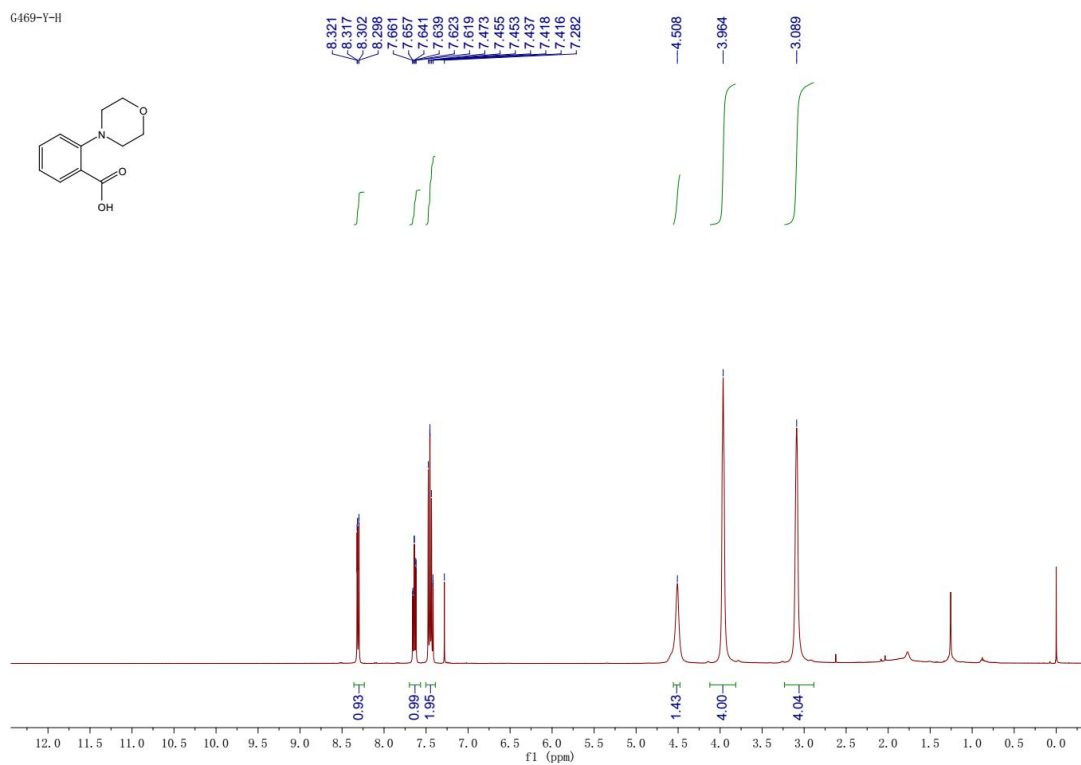

G469-Y-C

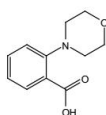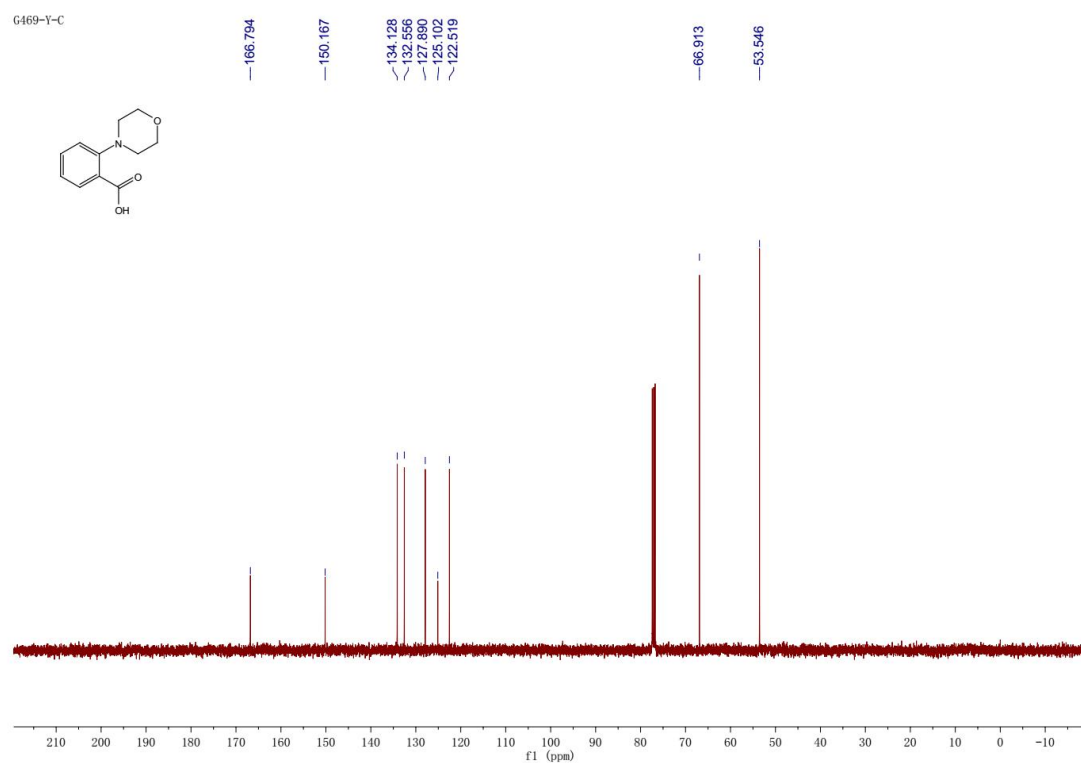

# NMR of 1bc

LLM-509-H

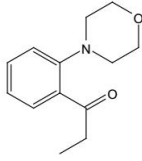

7.413  
7.409  
7.393  
7.391  
7.374  
7.370  
7.319  
7.315  
7.300  
7.286  
7.095  
7.060

3.820  
3.808  
3.797  
3.075  
3.056  
3.038  
3.020  
2.976  
2.964  
2.953

1.179  
1.161  
1.143

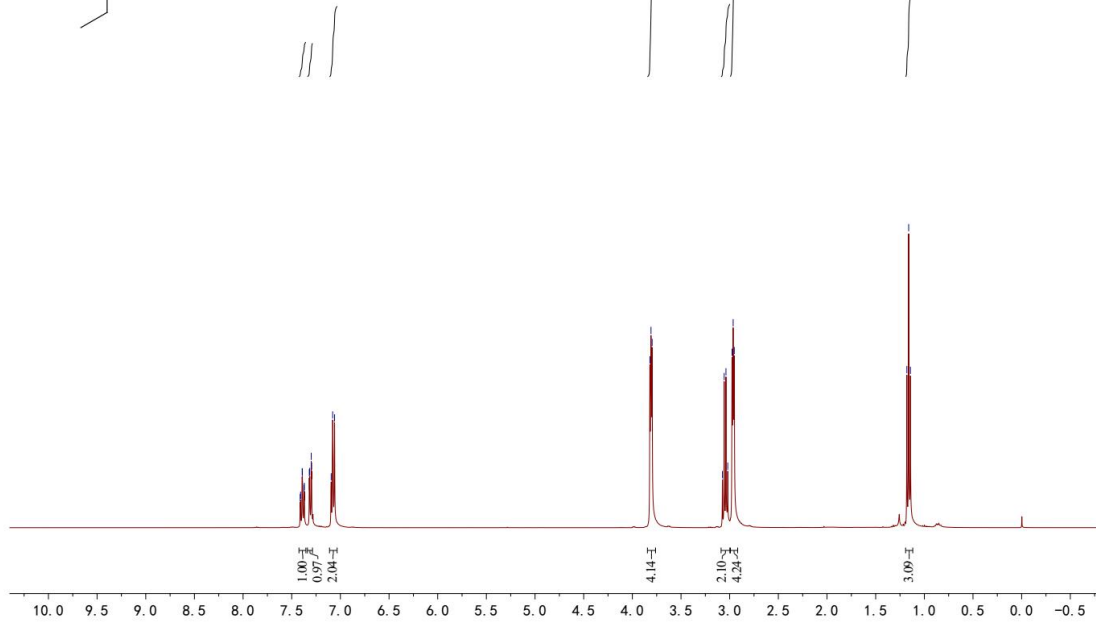

LLM-509-C

208.565

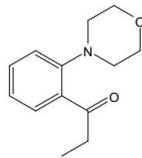

150.448

136.019  
131.413  
128.620  
123.157  
118.681

67.059

53.250

35.133

8.696

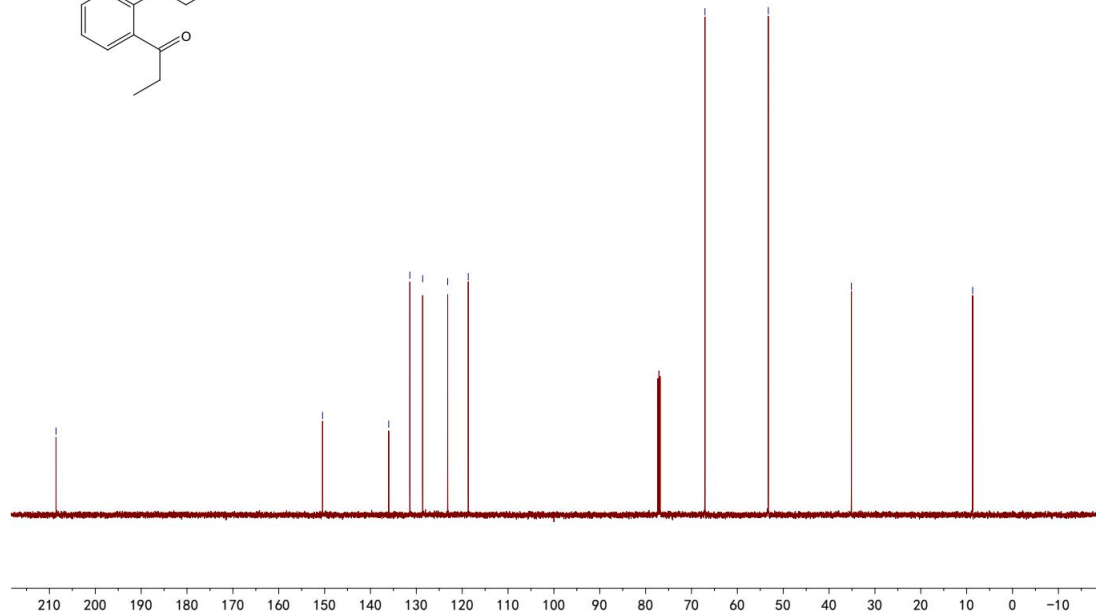

# NMR of 1bd

G410-H

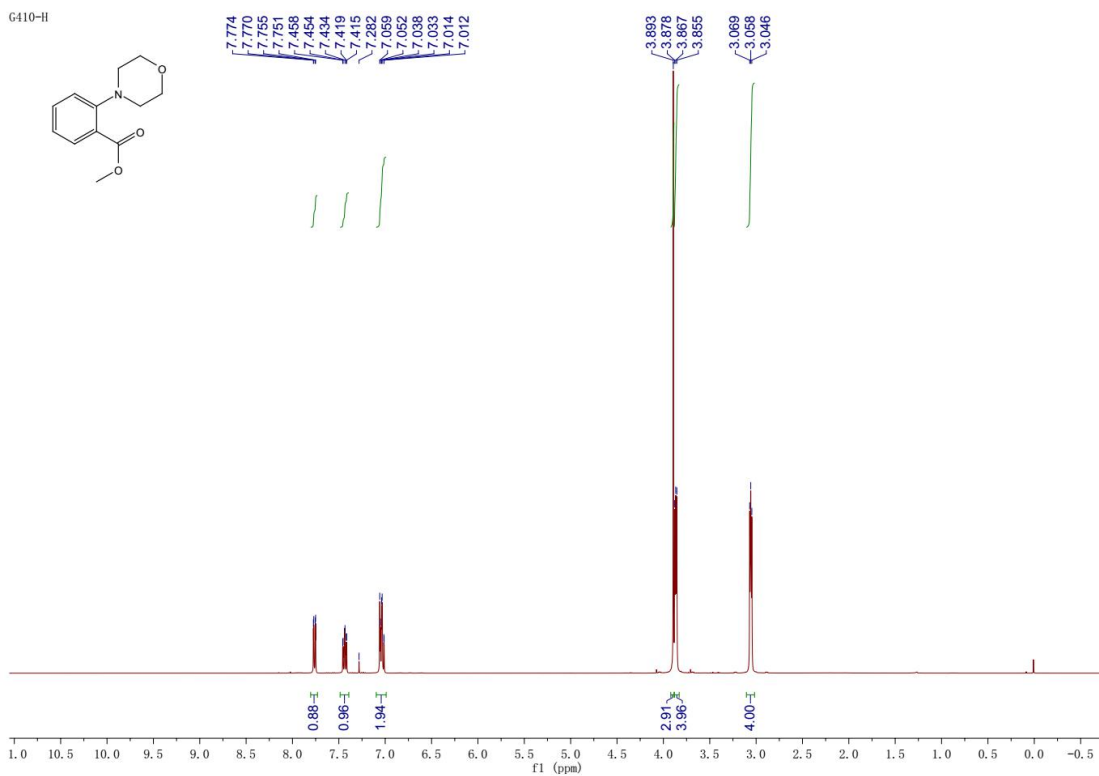

LLM-G410-C

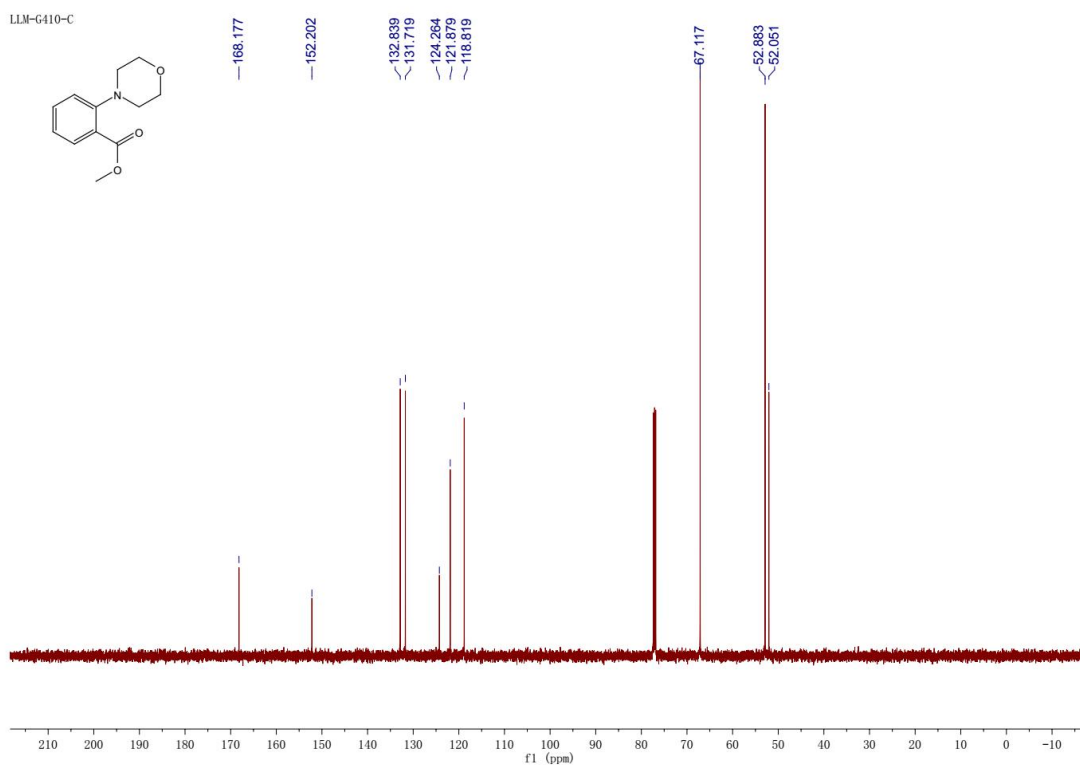



# NMR of 1bg

LLM-554-H

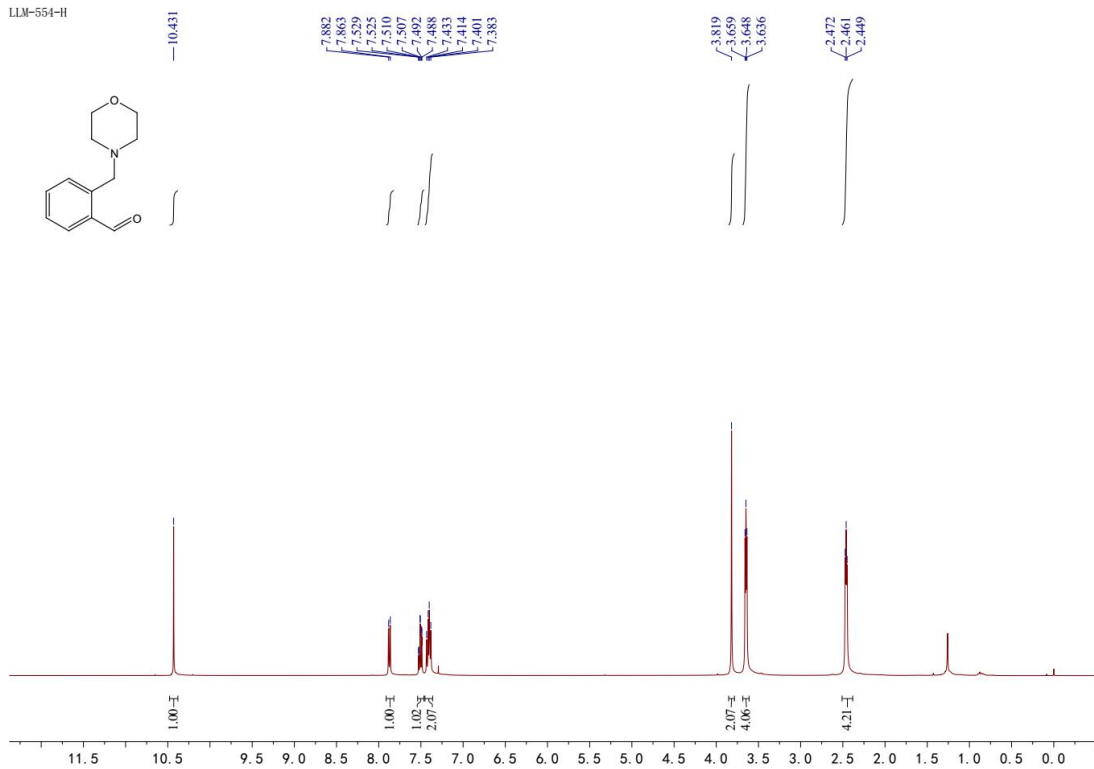

LLM-554-C

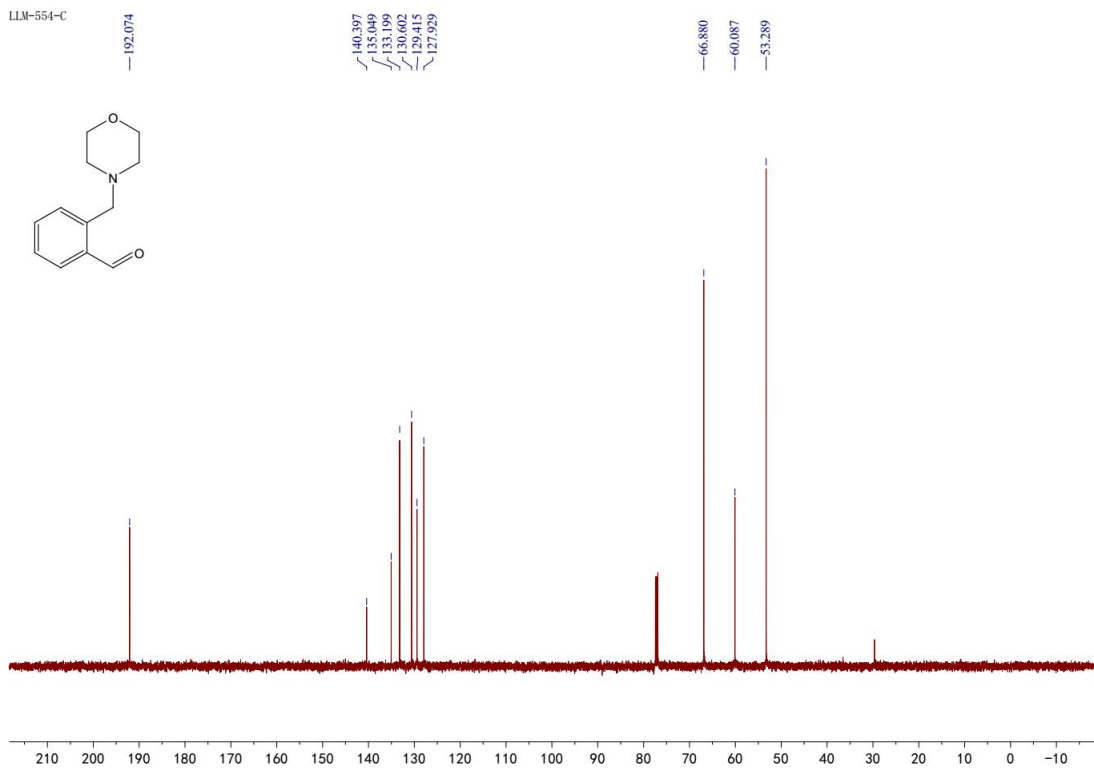

# NMR of 1bh

LLM-0723-H1

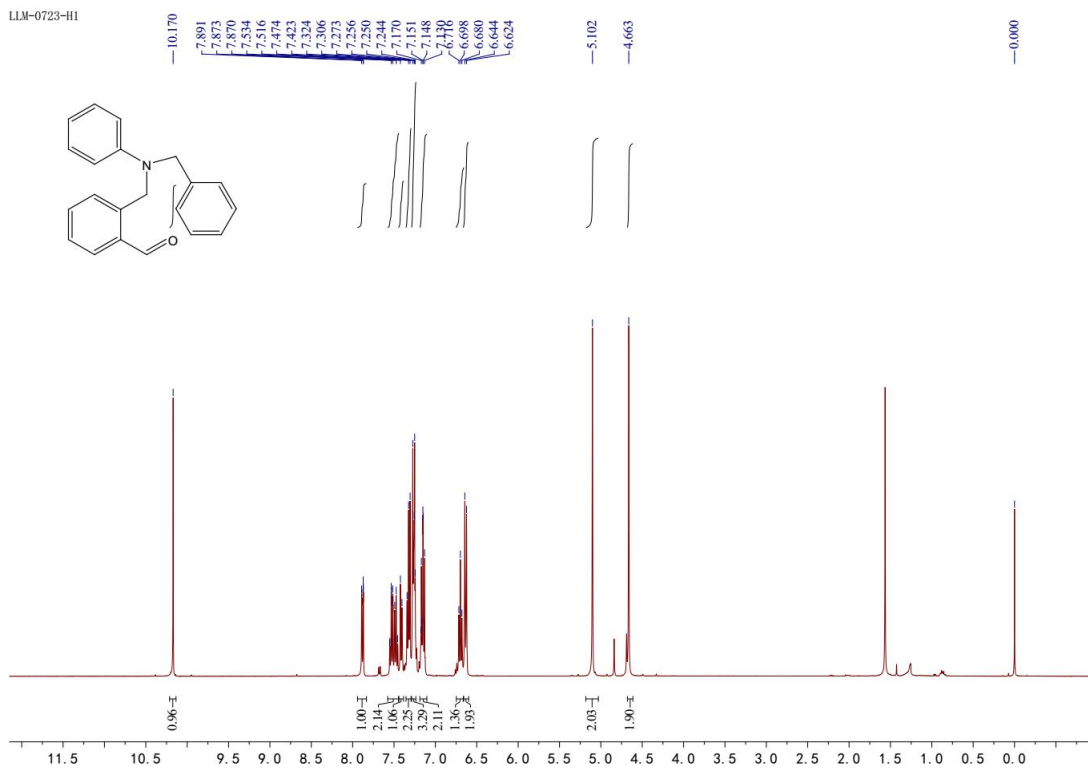

571-C

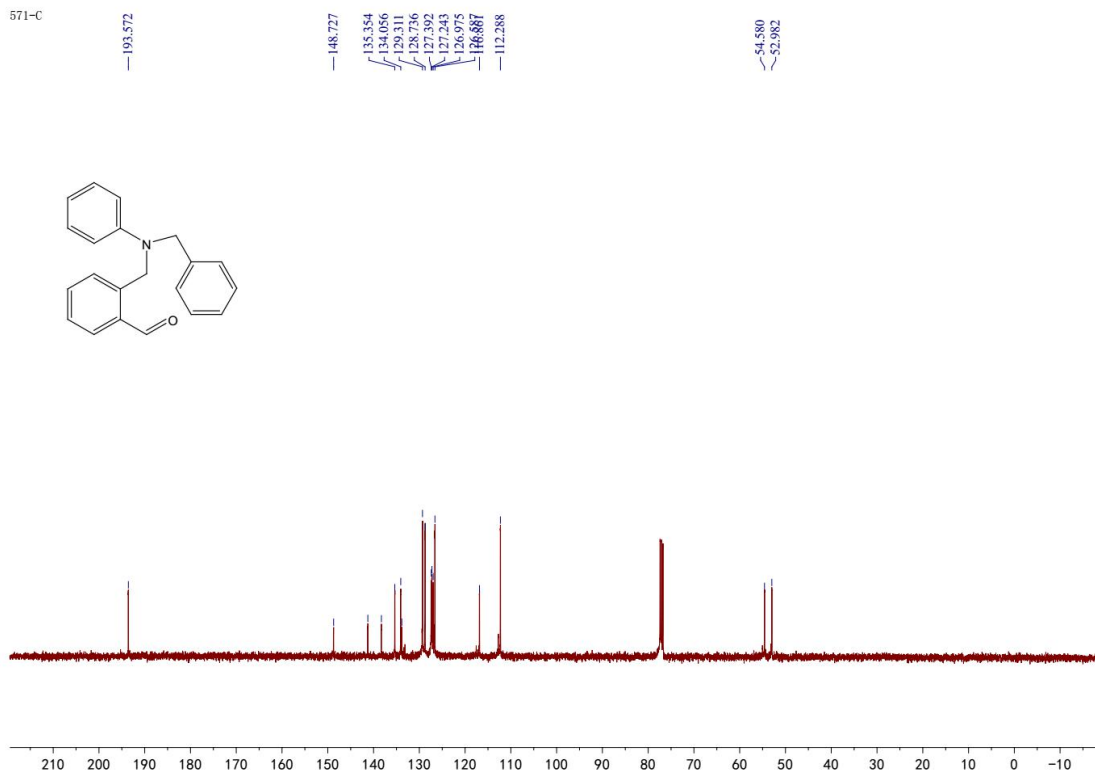

# NMR of 1bi

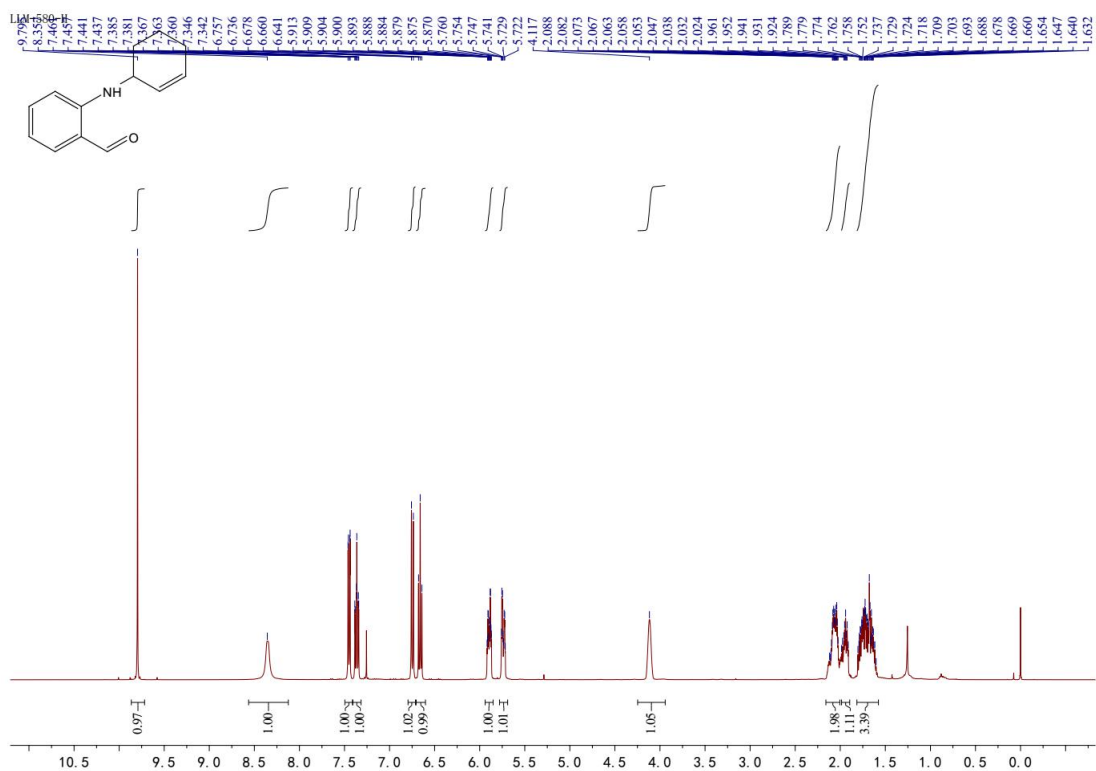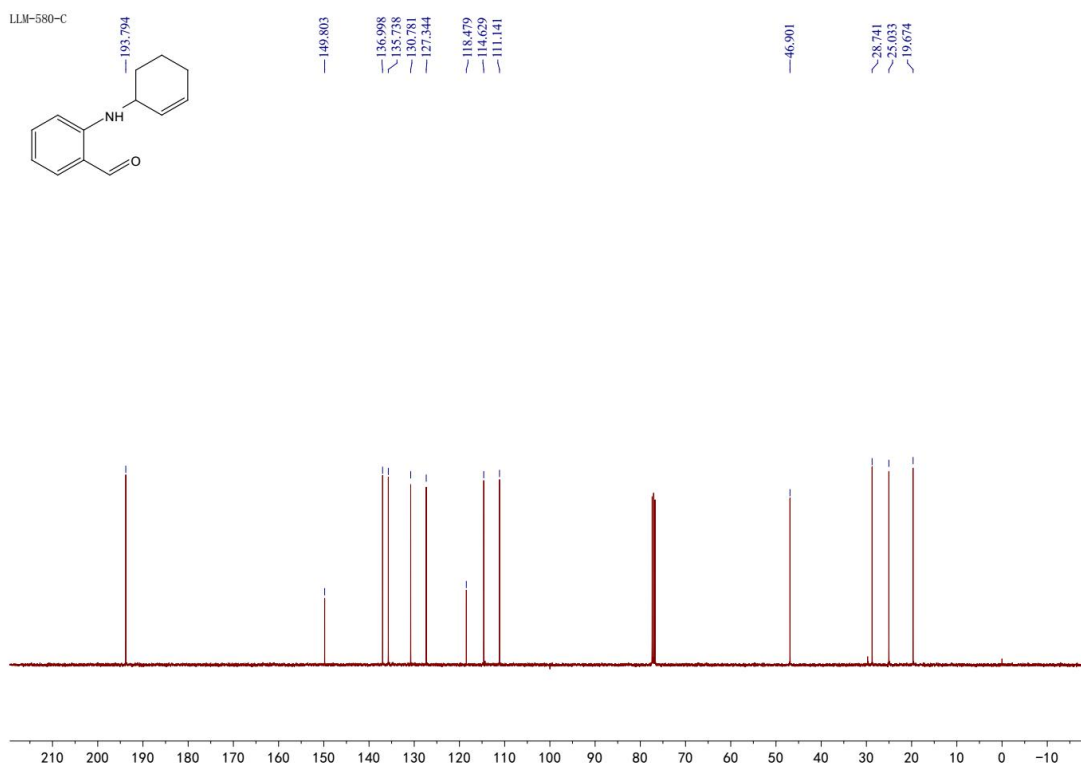

# NMR of 1bj

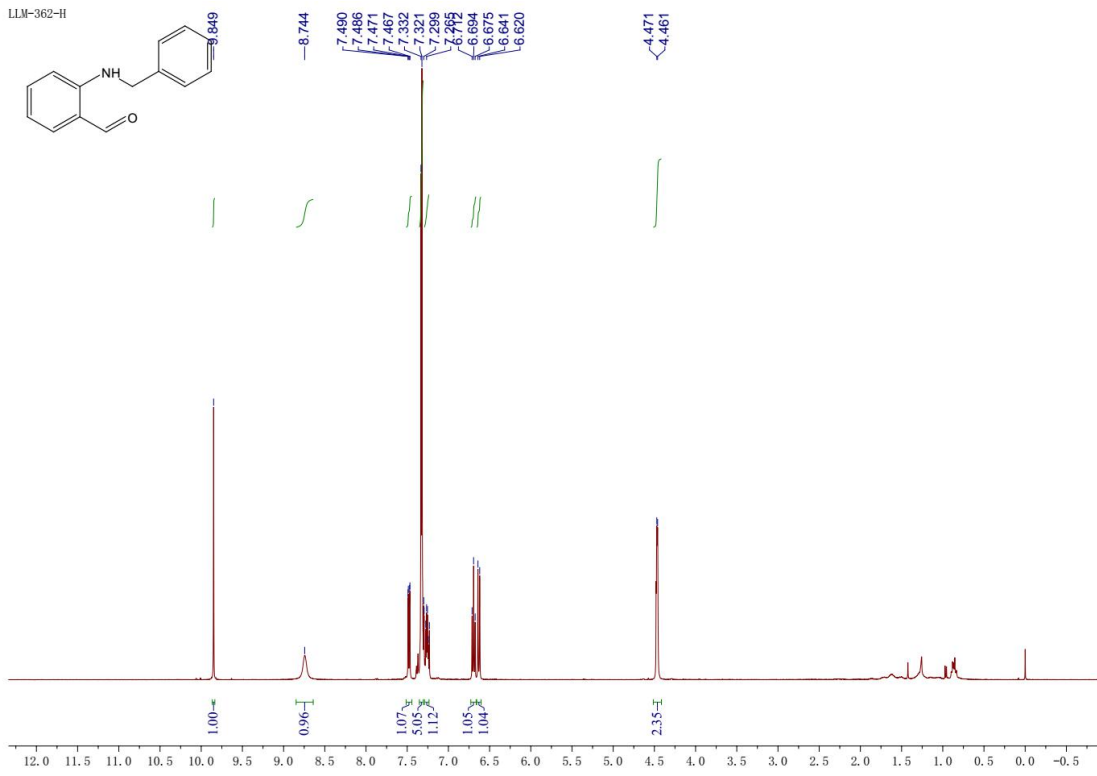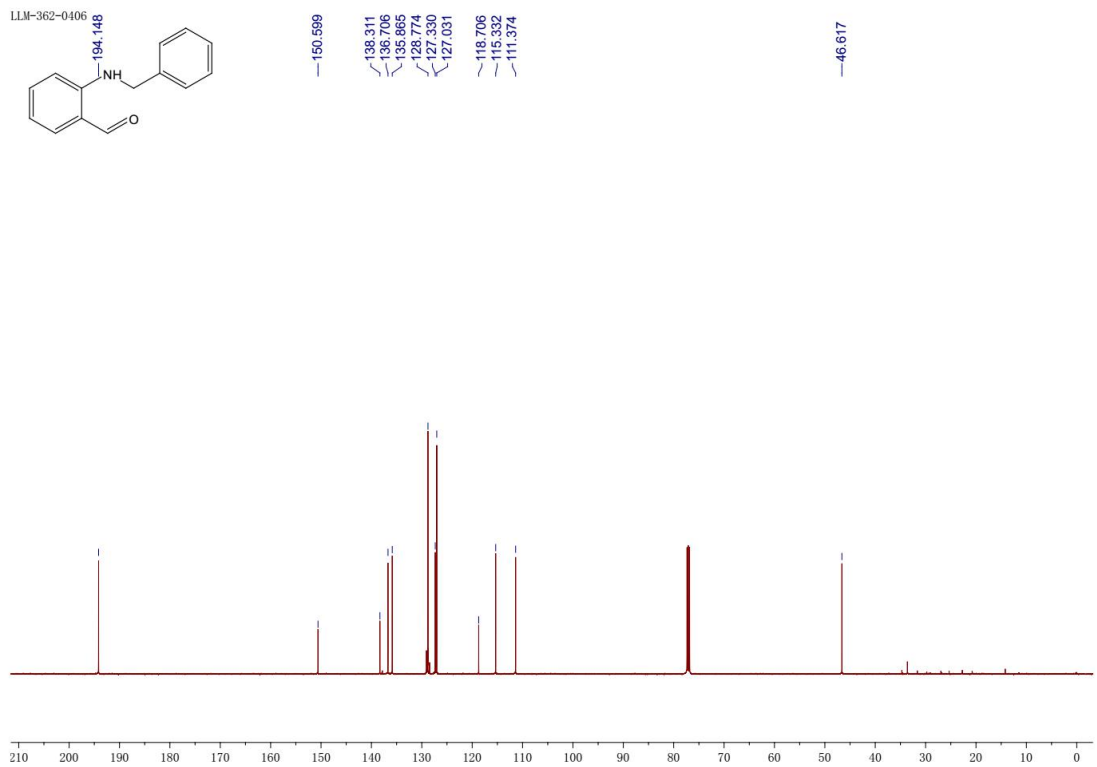

# NMR of 1bk

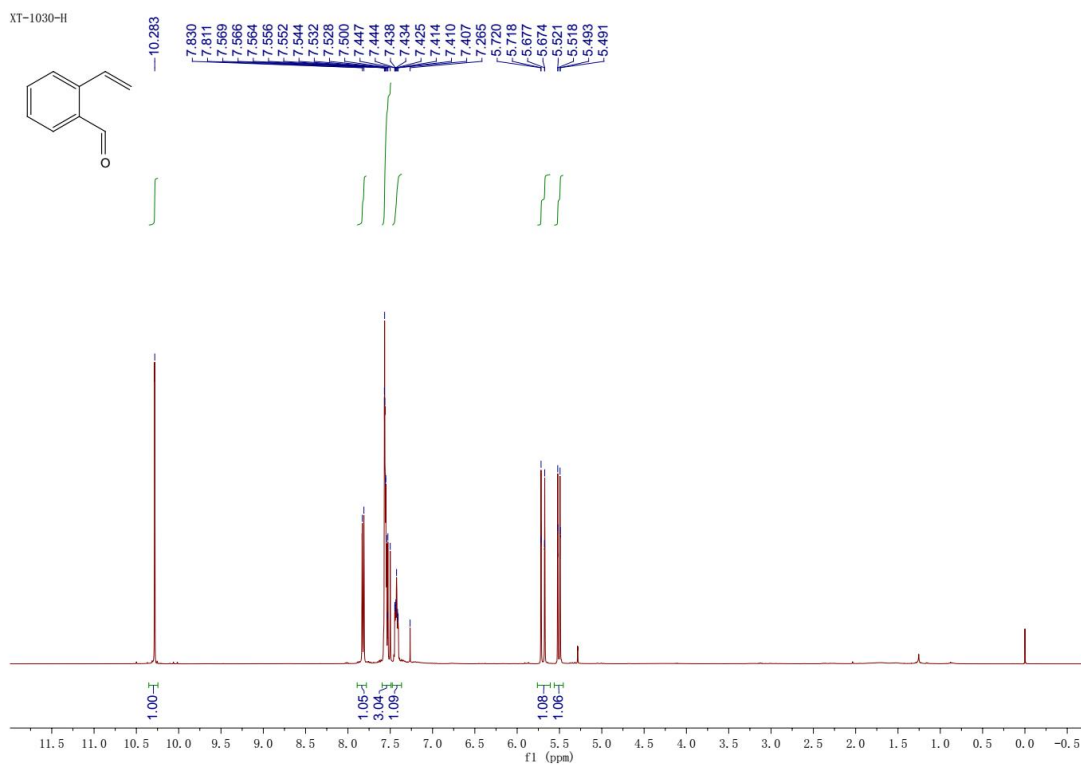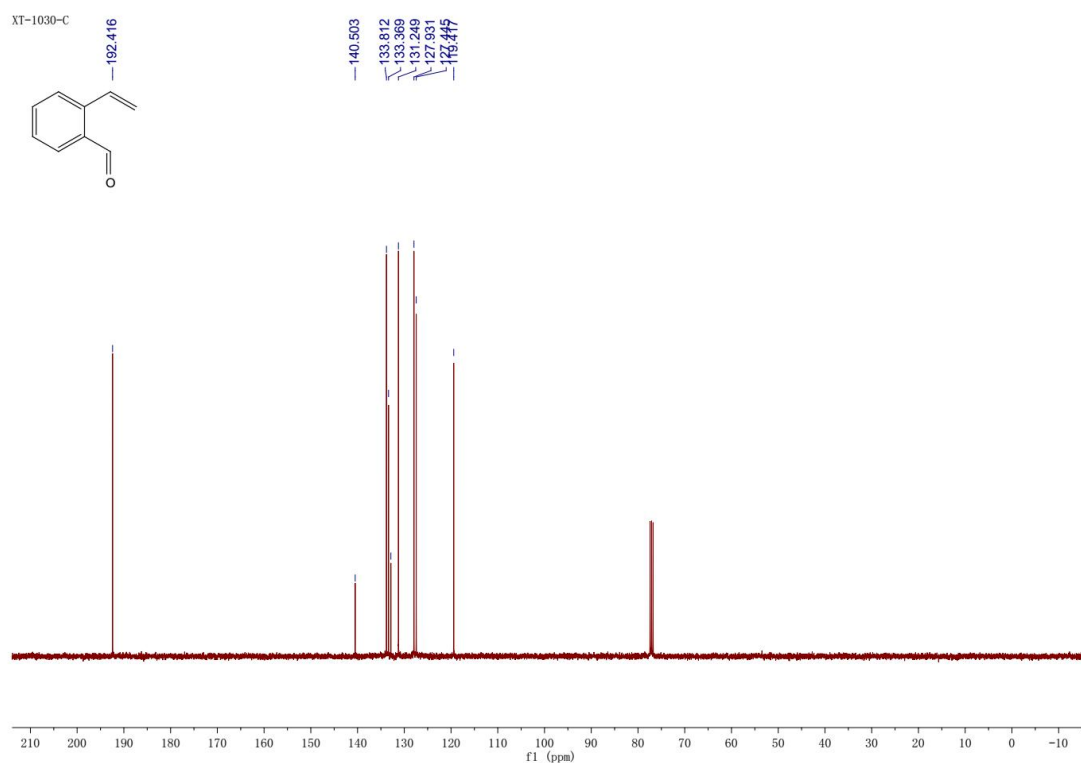

# NMR of 1b1

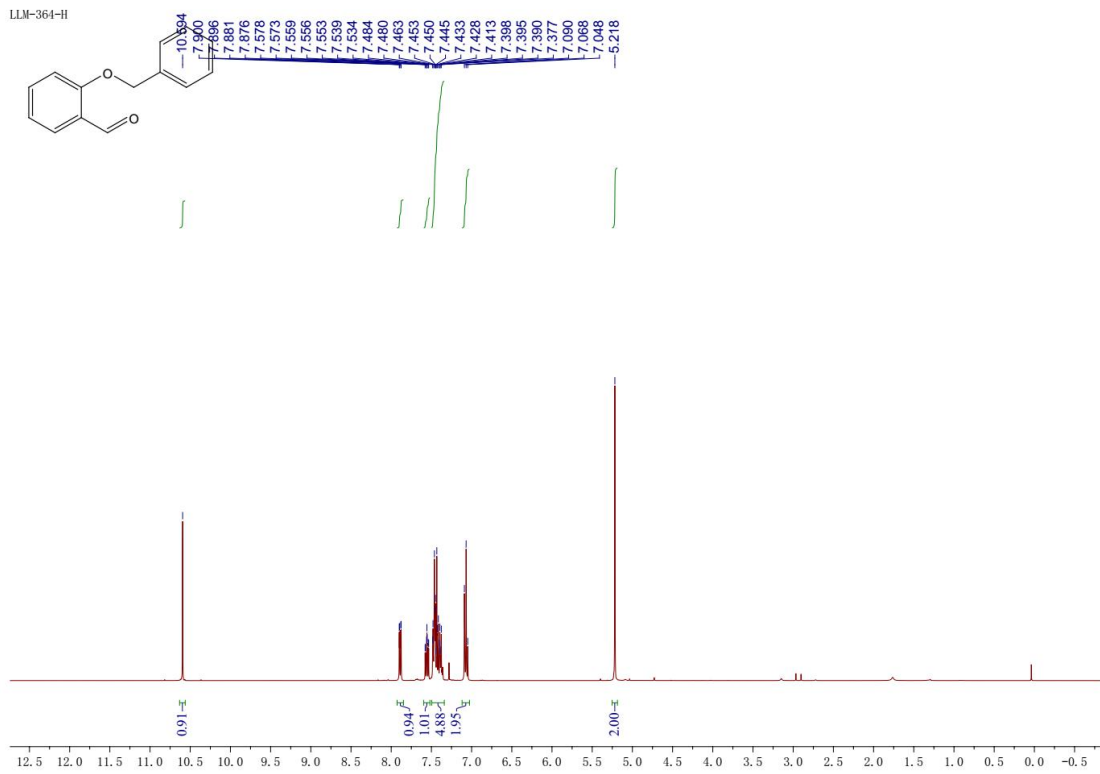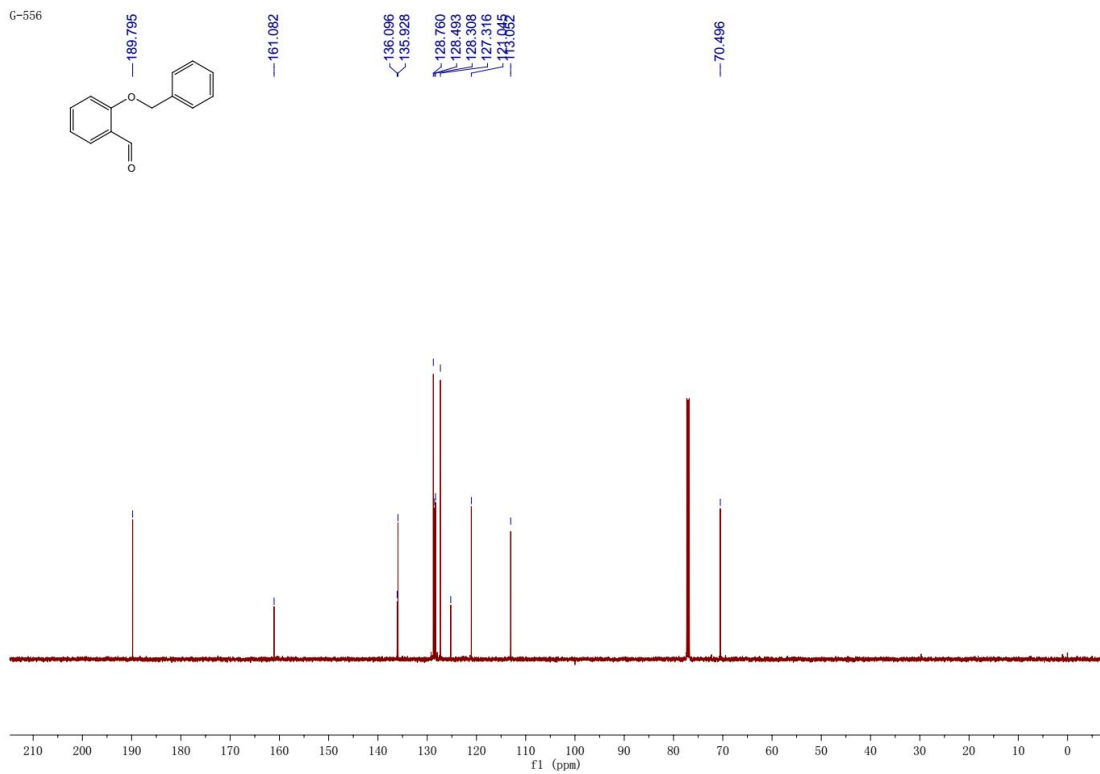

### NMR of 1bm

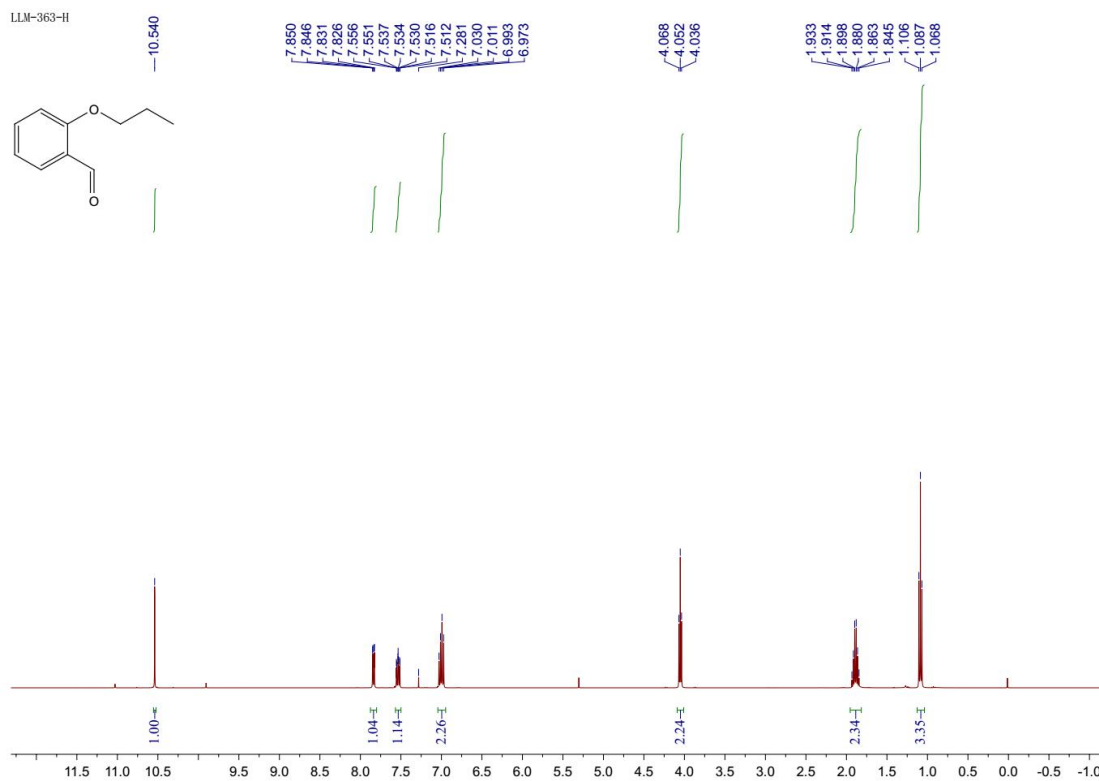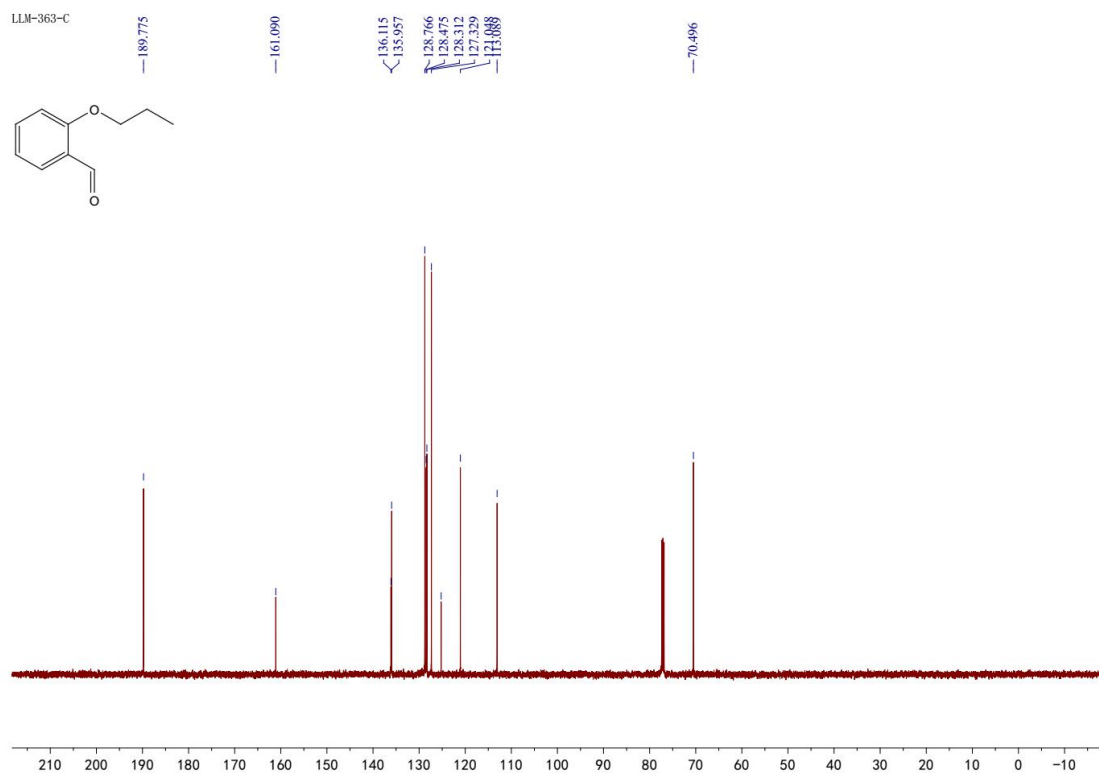

# NMR of 1bn

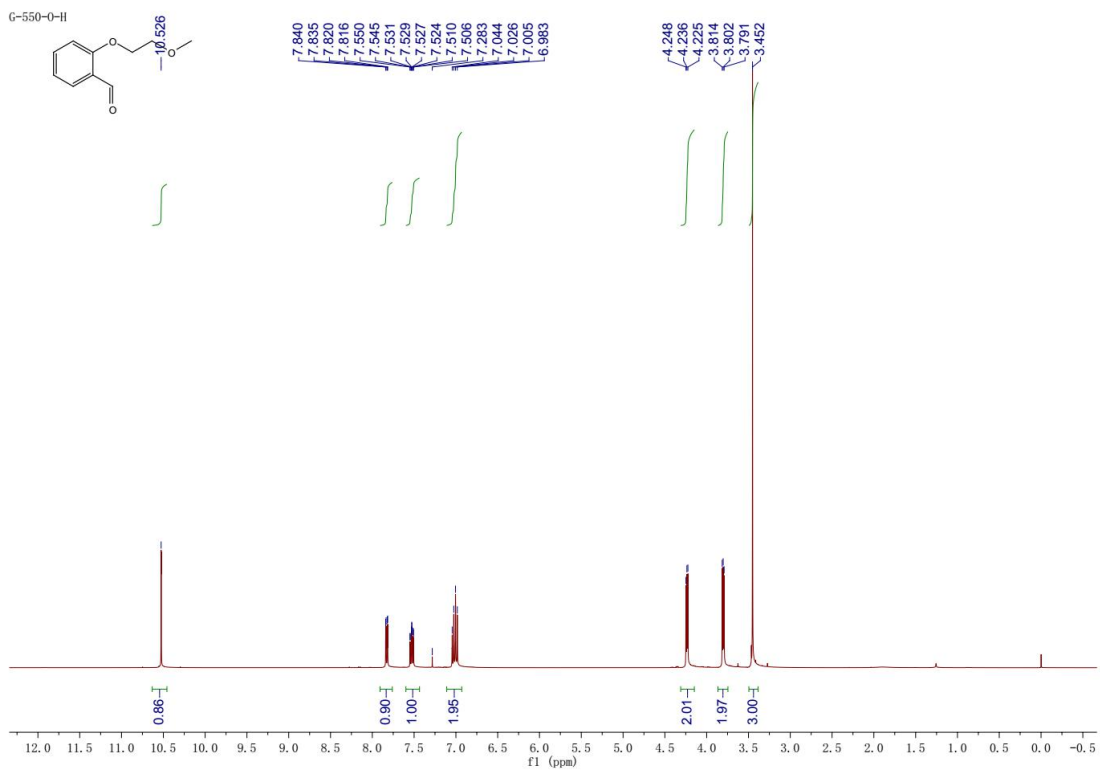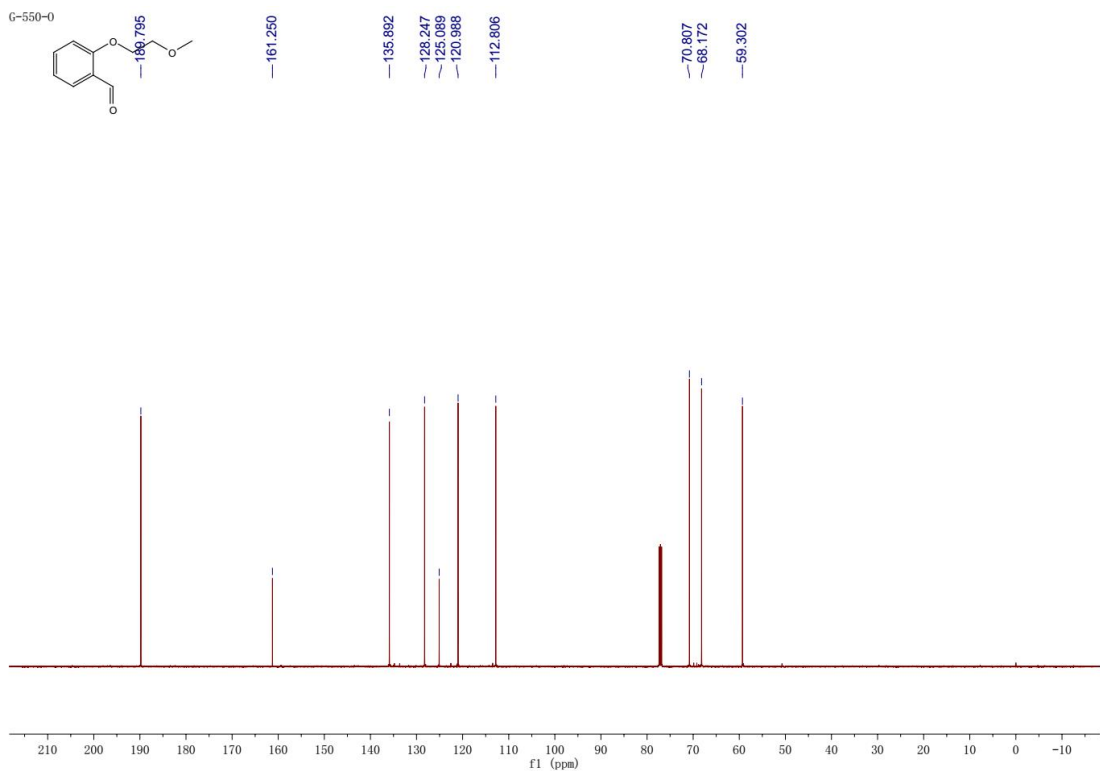



# NMR of 2a

LLM-G349-H

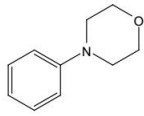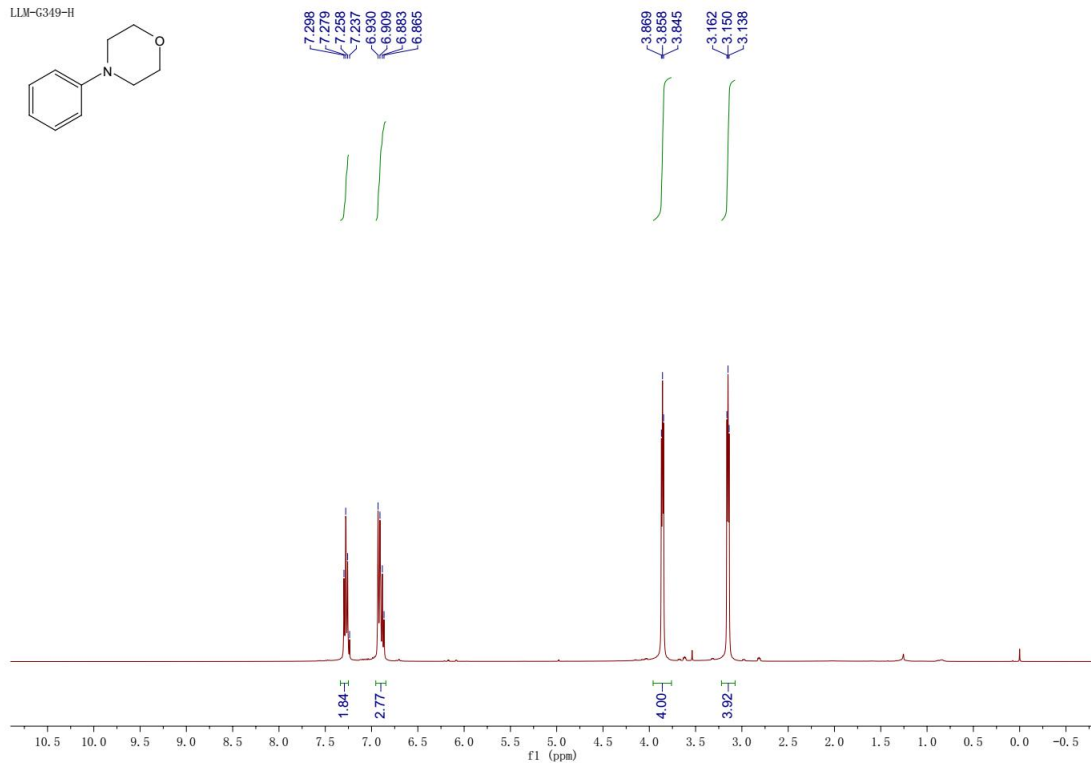

LLM-G349-C

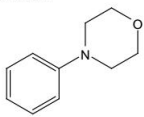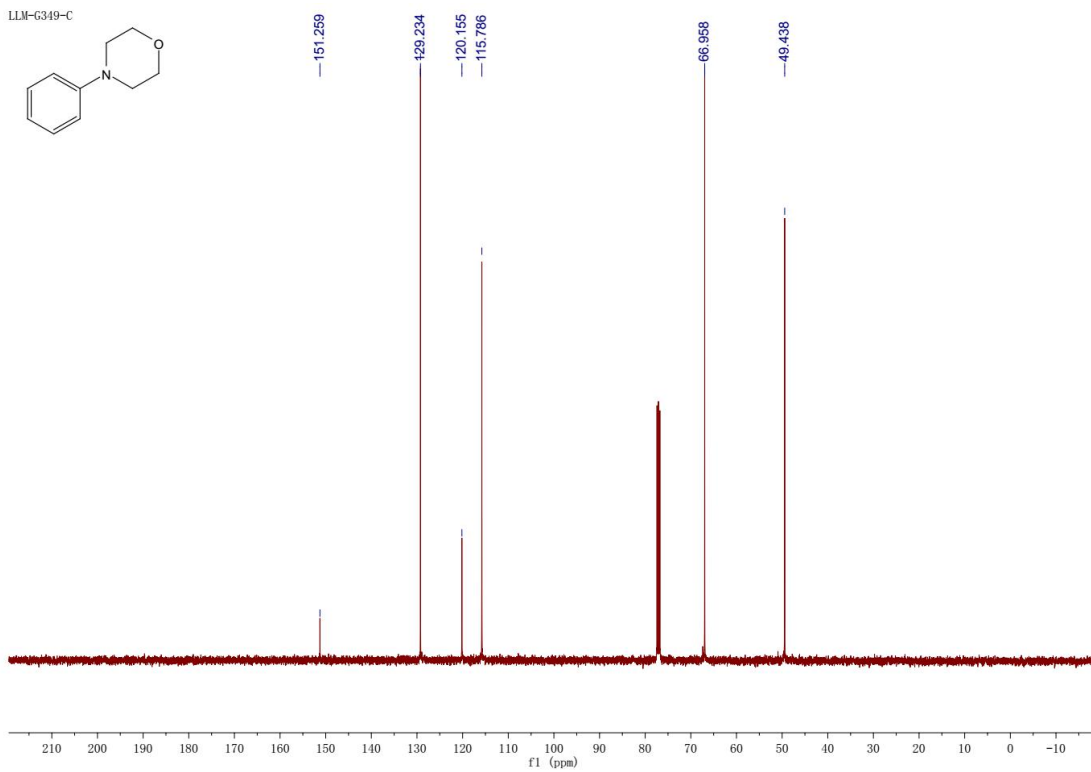

# NMR of 2b

G480-H

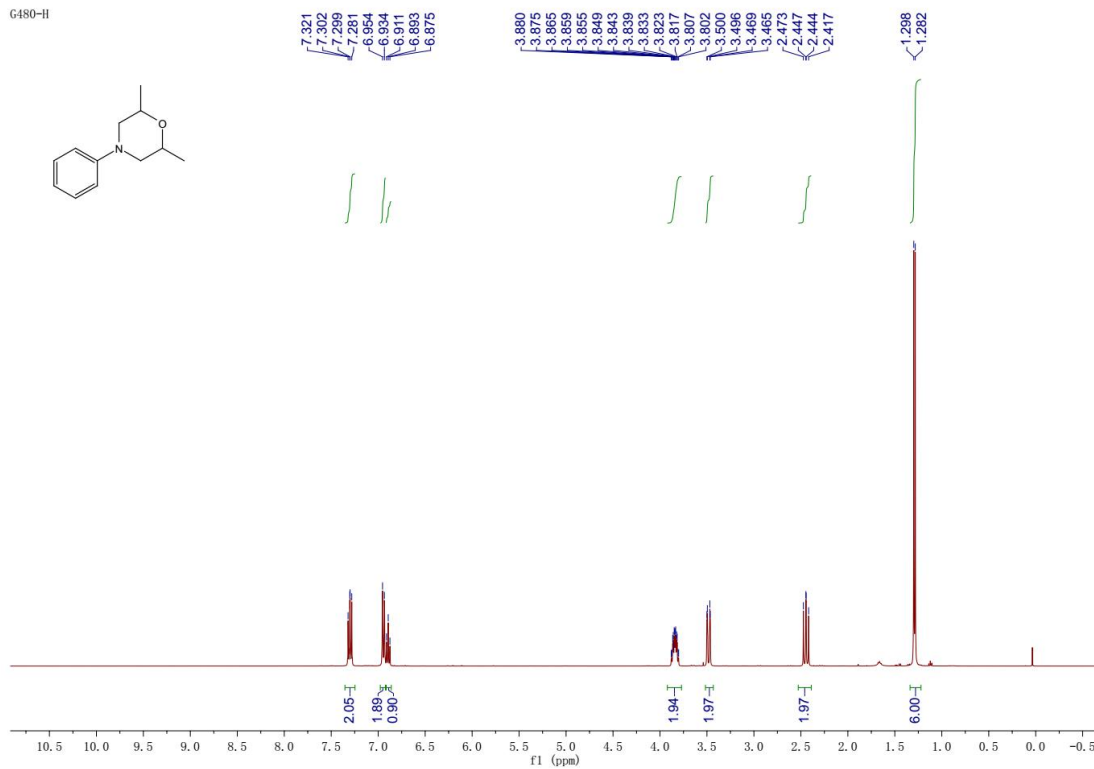

G480-C

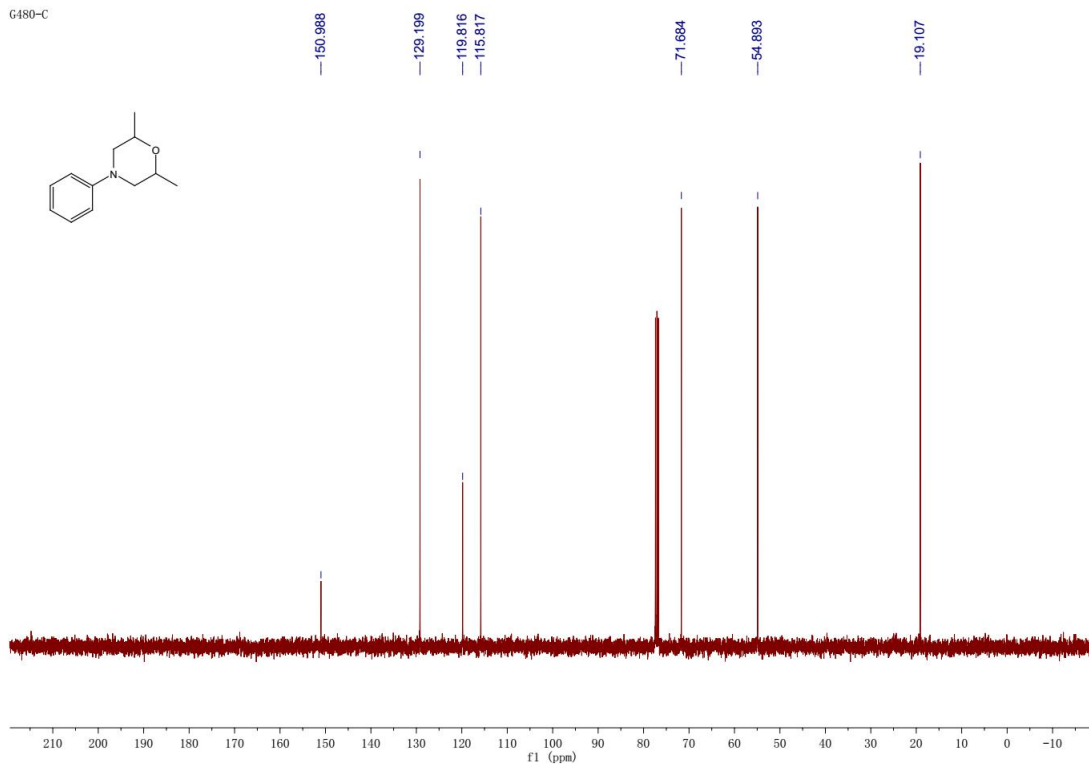

# NMR of 2c

LLM-G415-0315-1-H

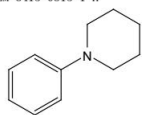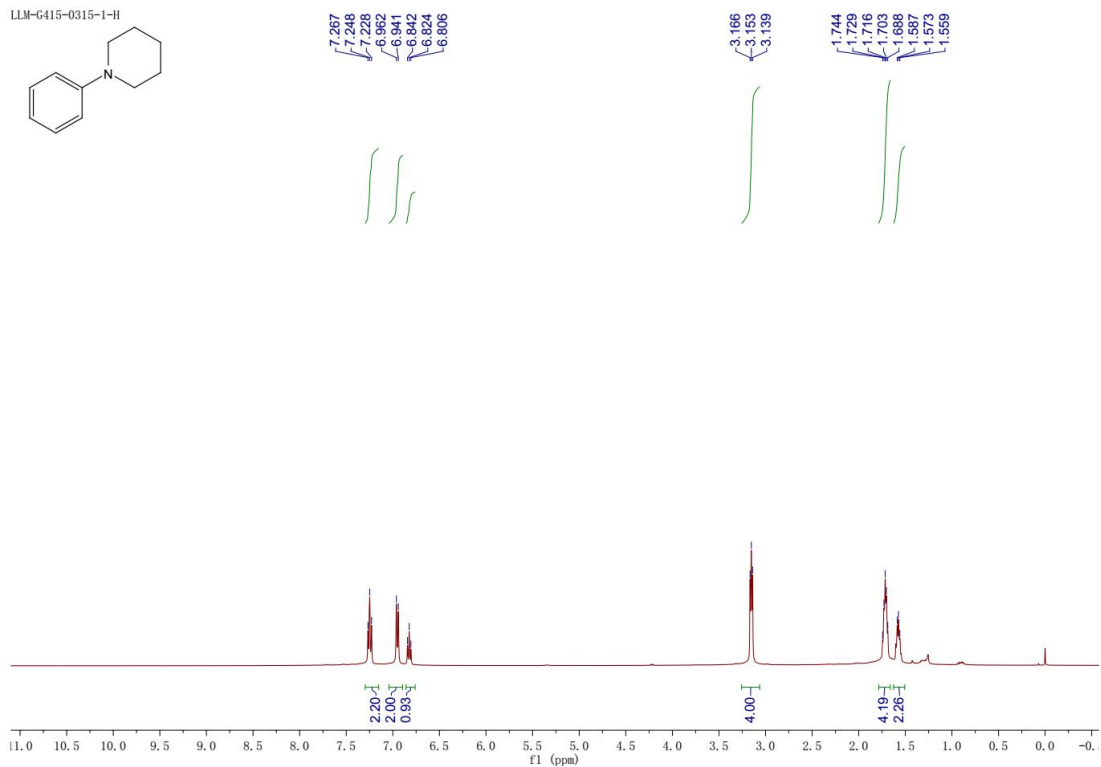

LLM-G445-C

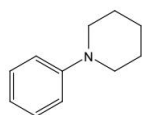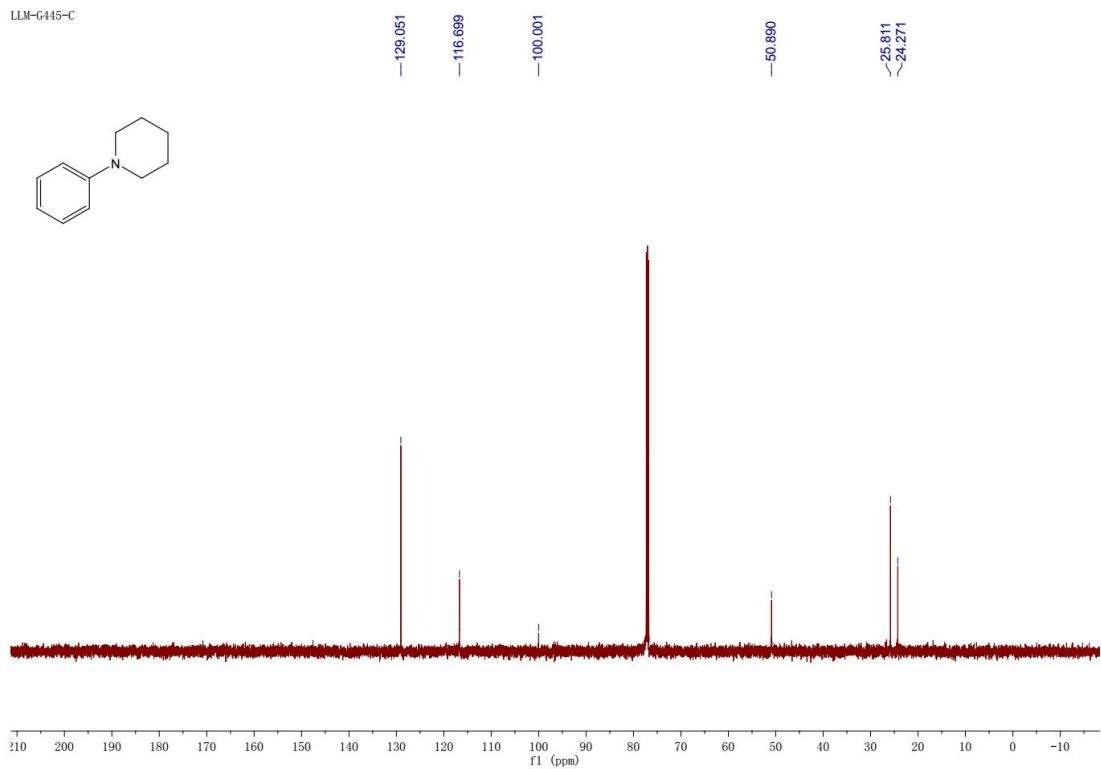

# NMR of 2d

G490-H

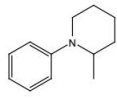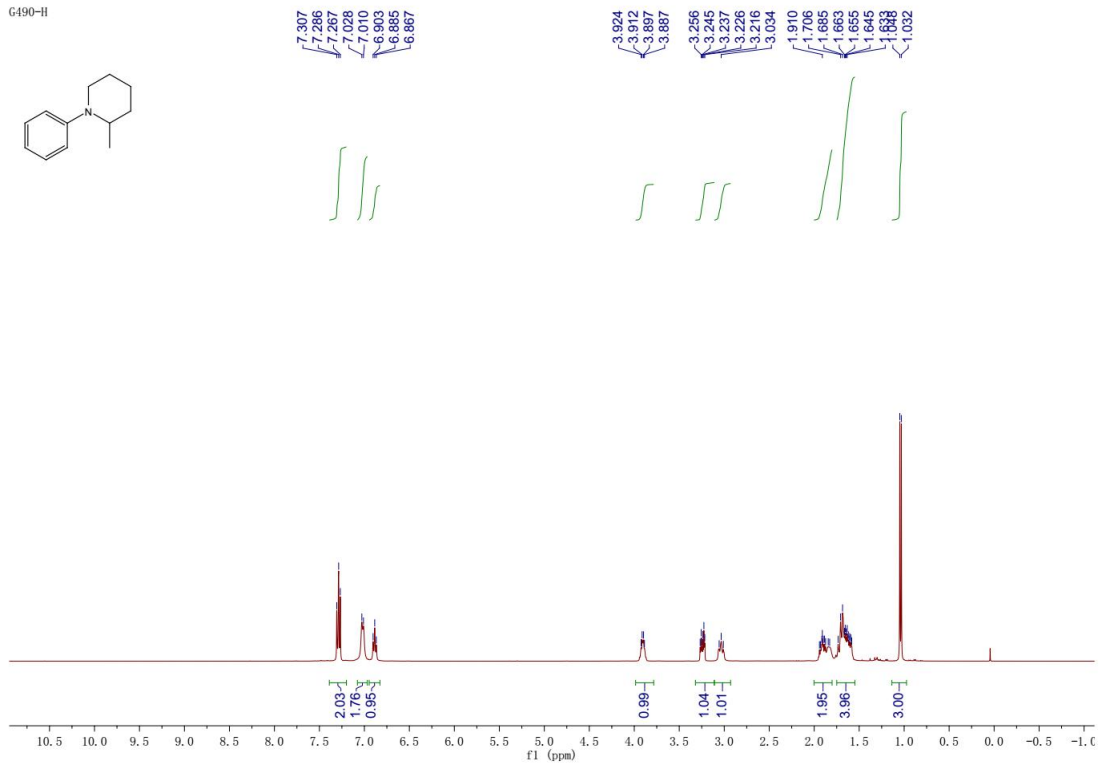

G515

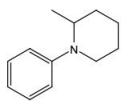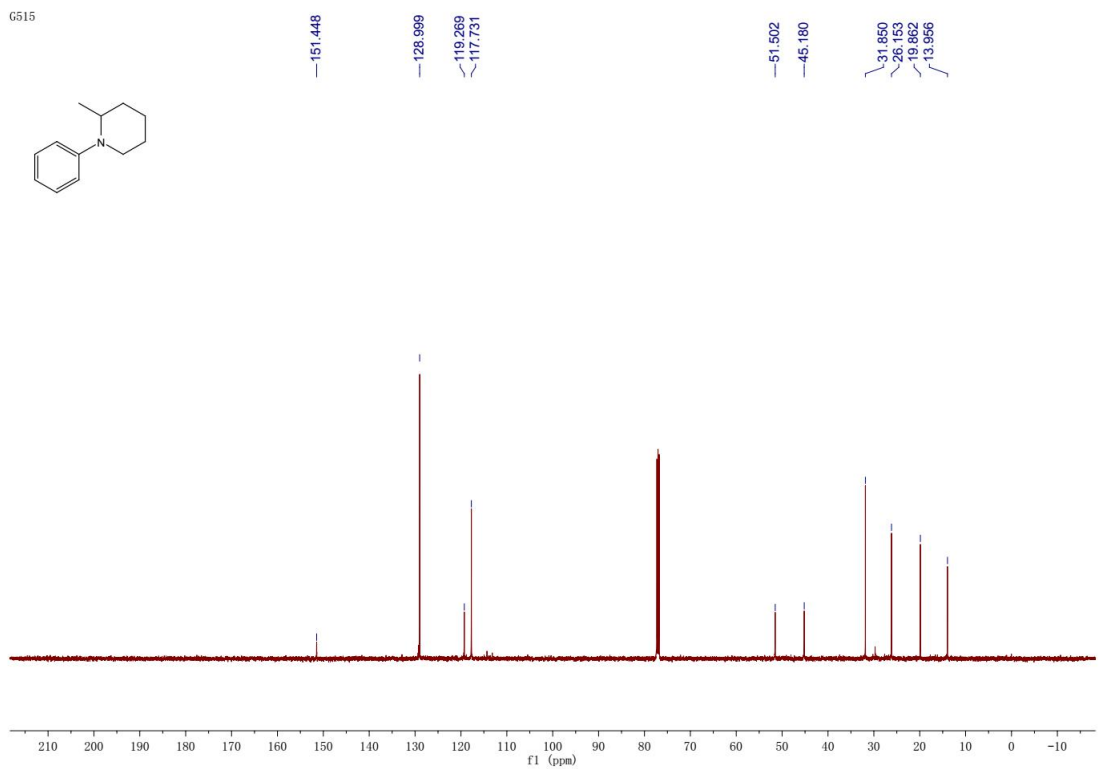

# NMR of 2e

QVH-H

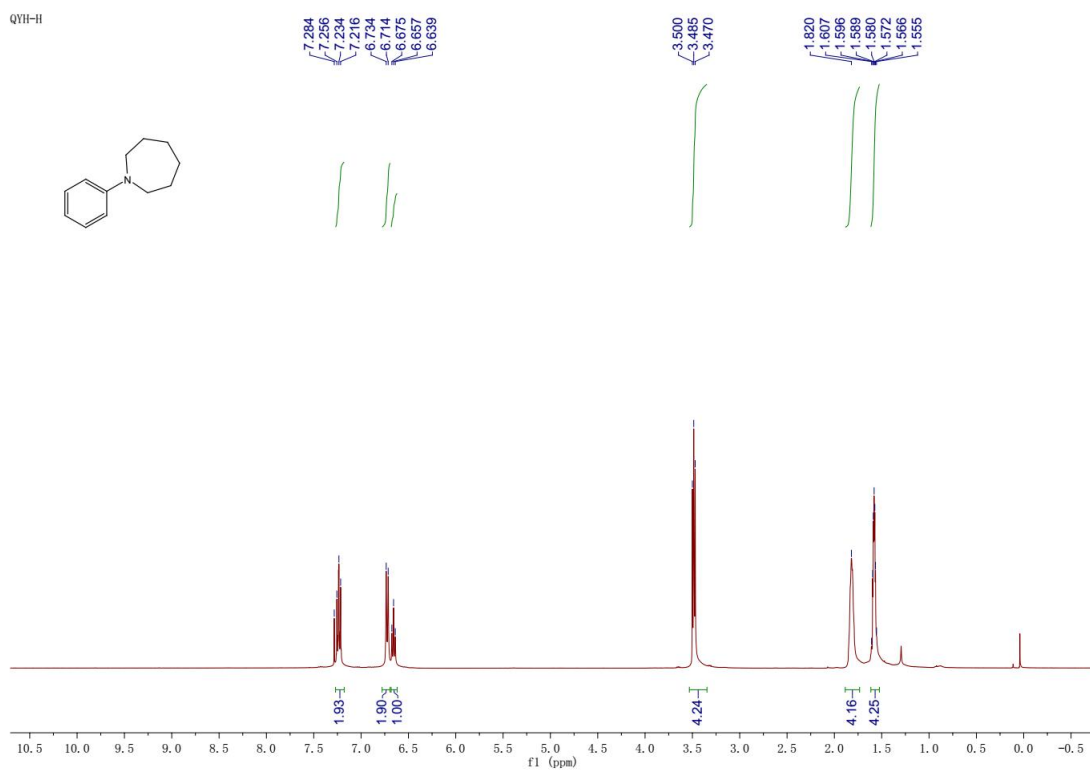

QVH-C

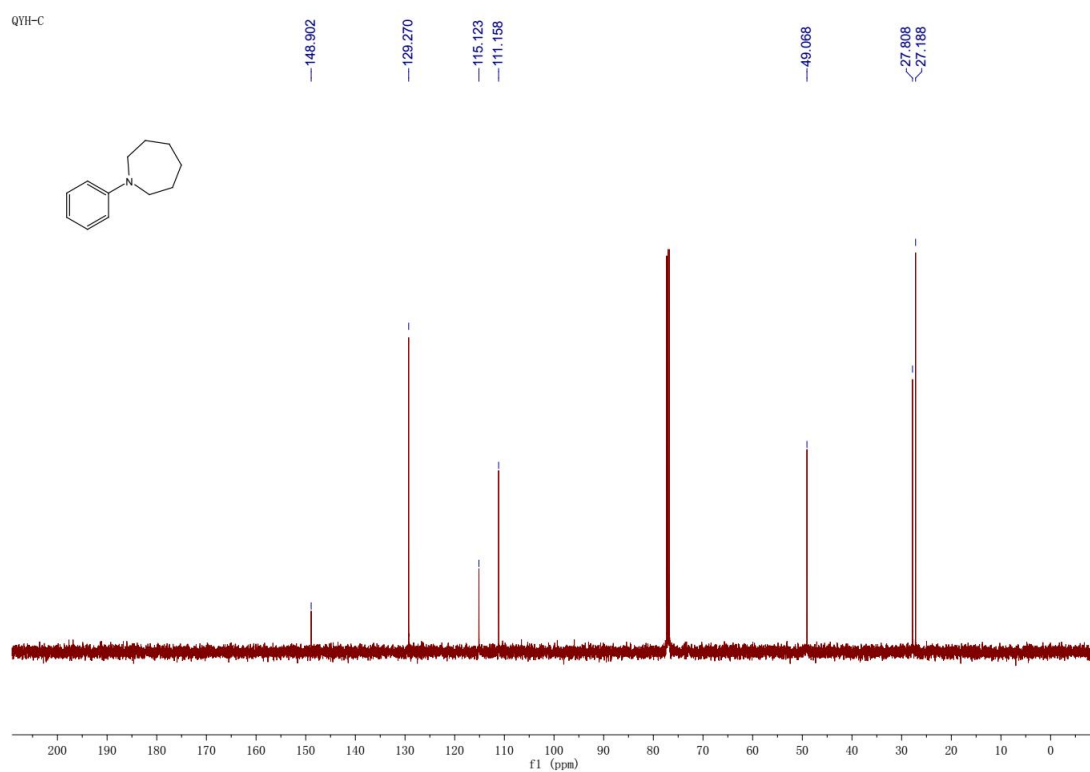

# NMR of 2f

G467-H

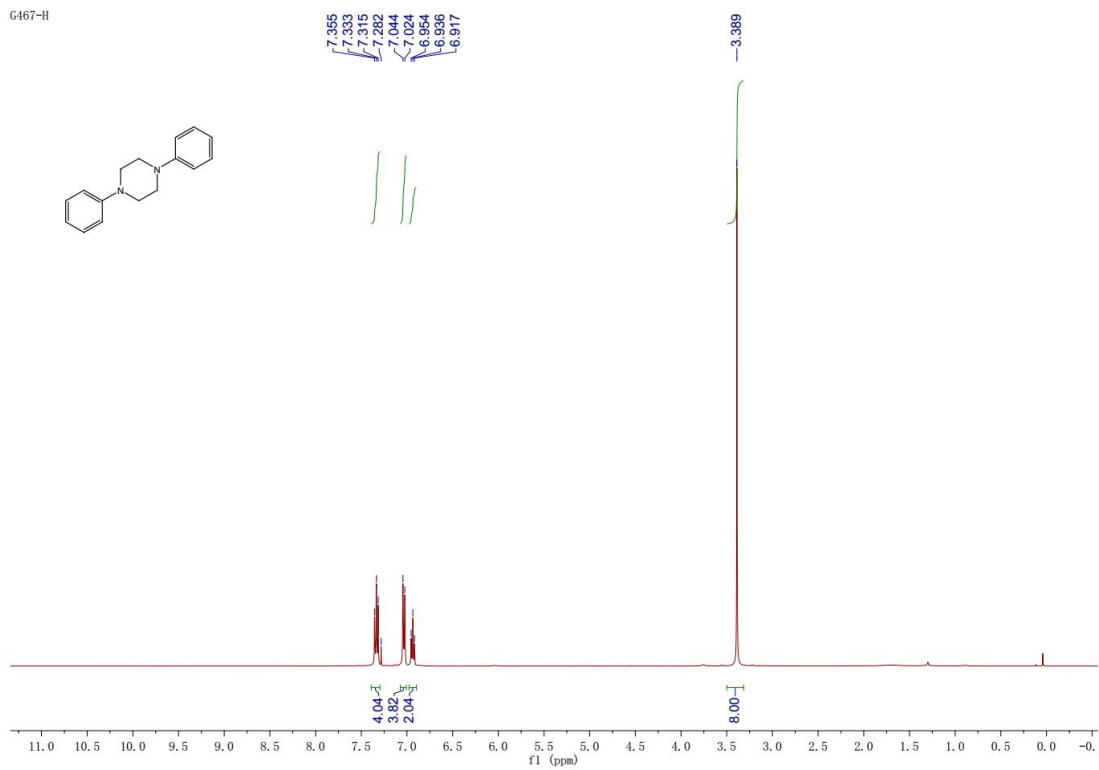

G467-C

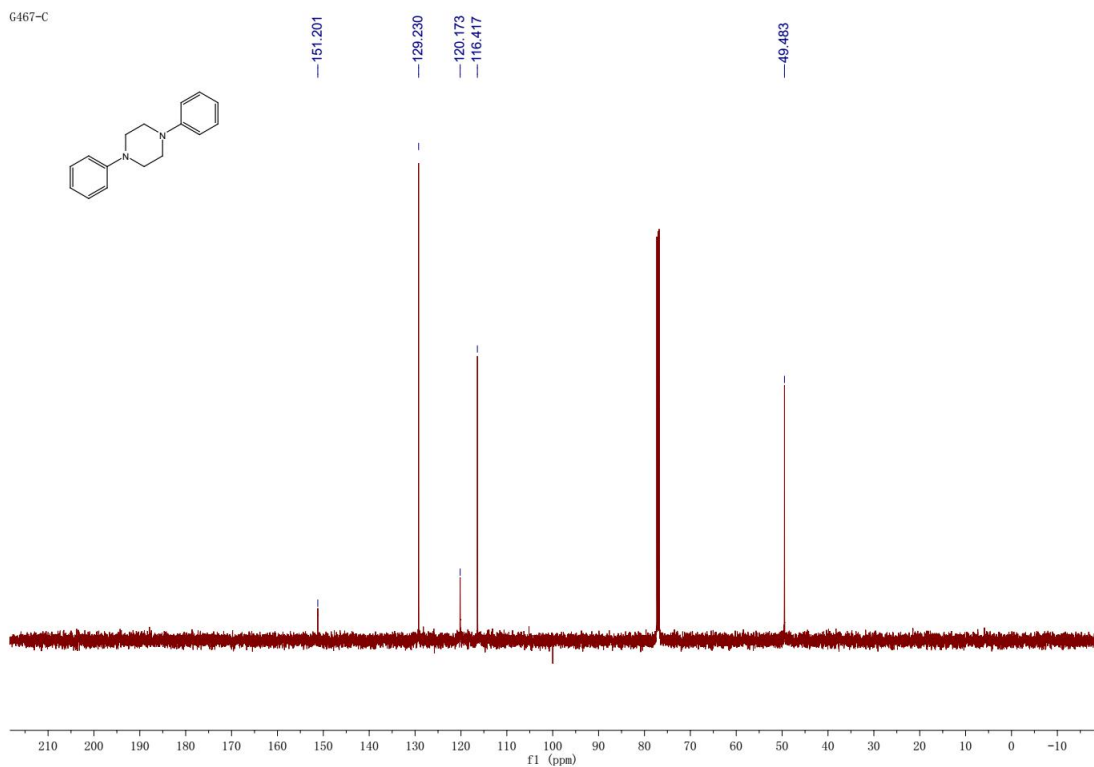

# NMR of 2g

K85-2-H

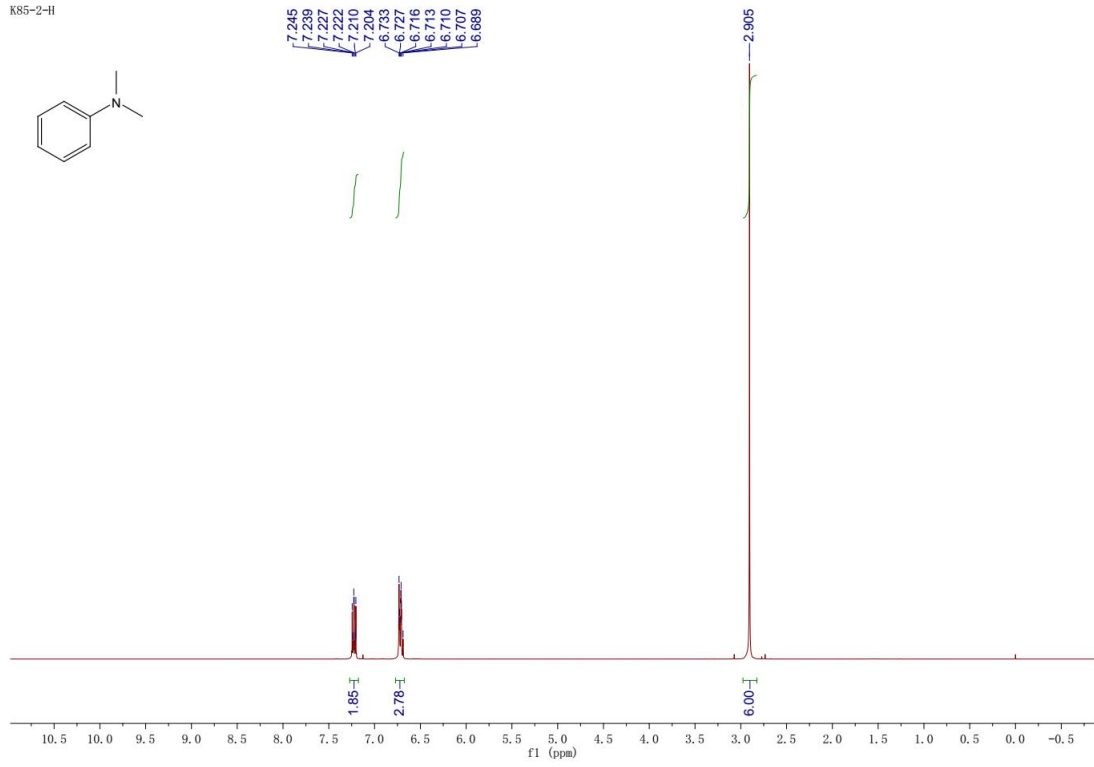

K85-2-C

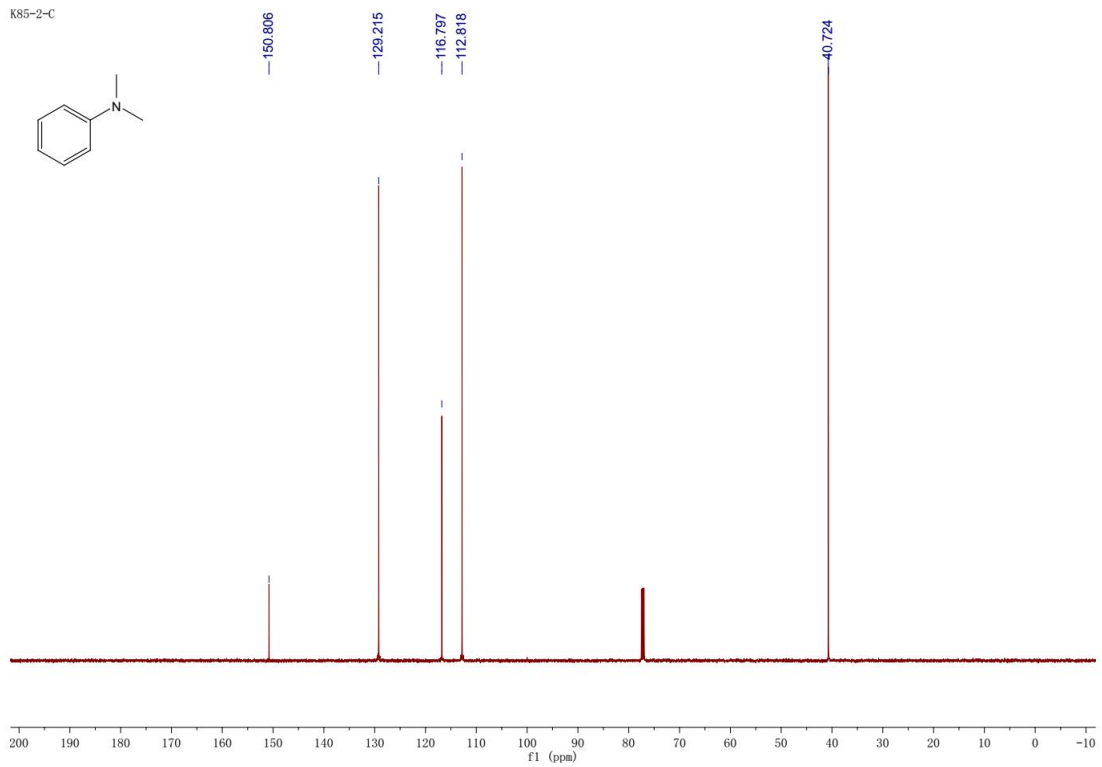

# NMR of 2h

XBJ-H

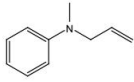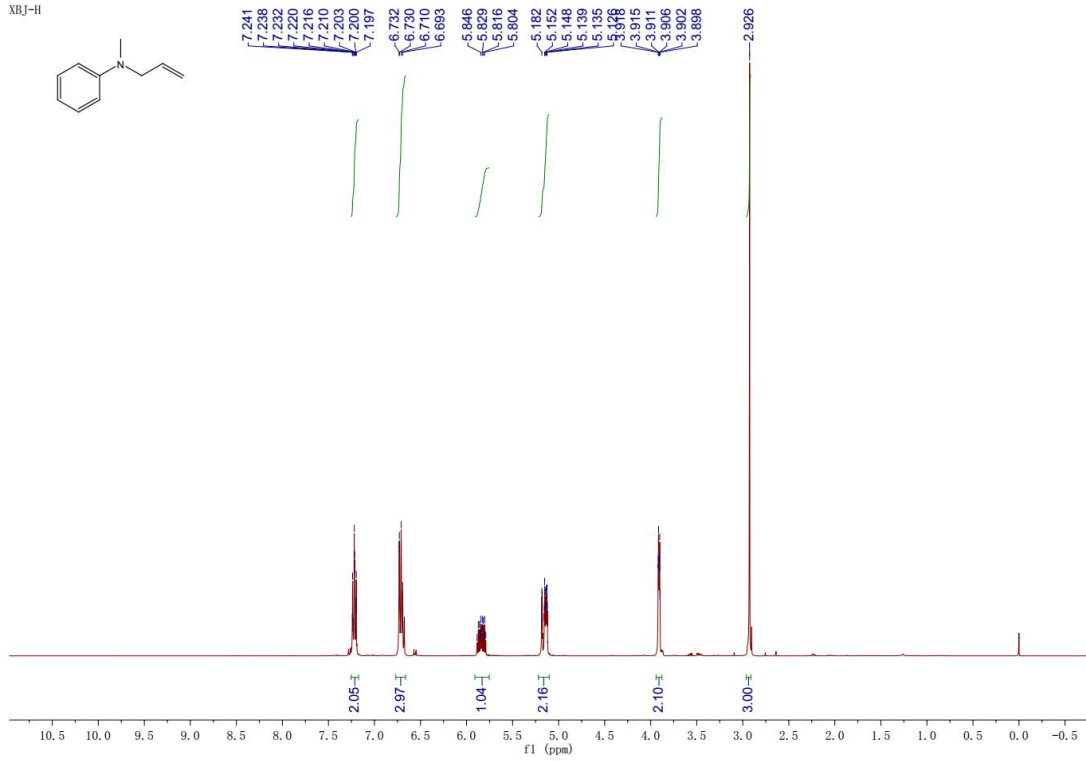

XBJ-C-2

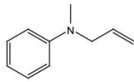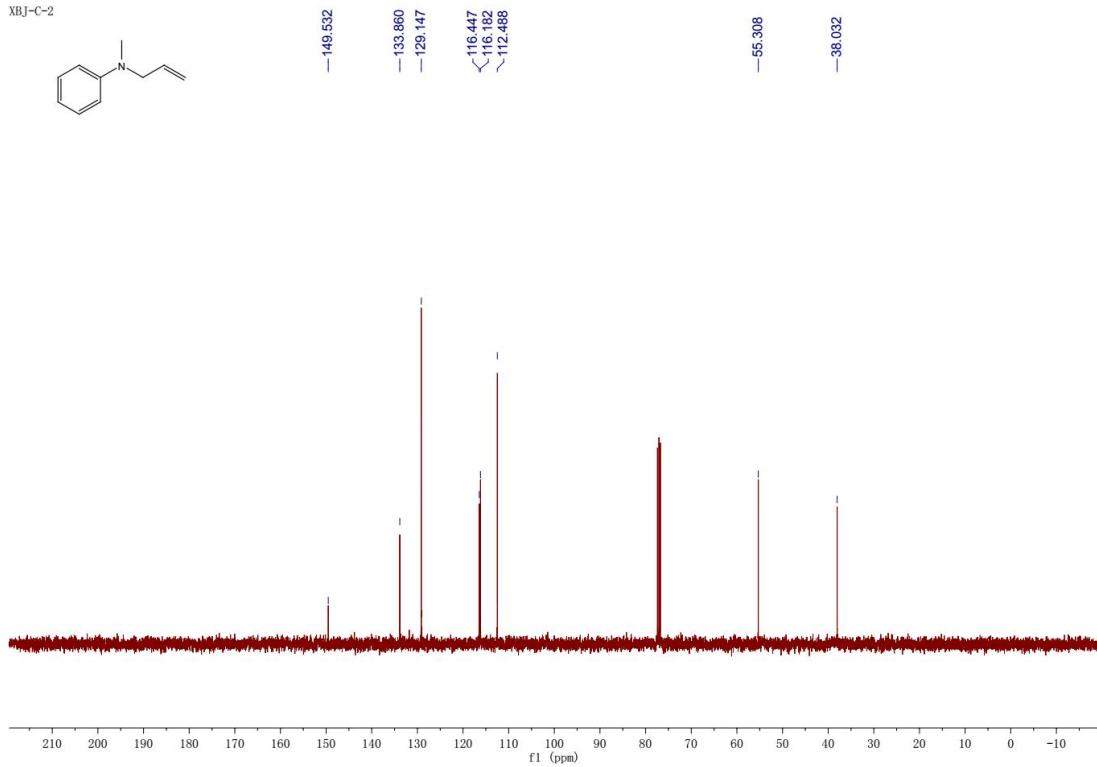



# NMR of 2i

G-562-H

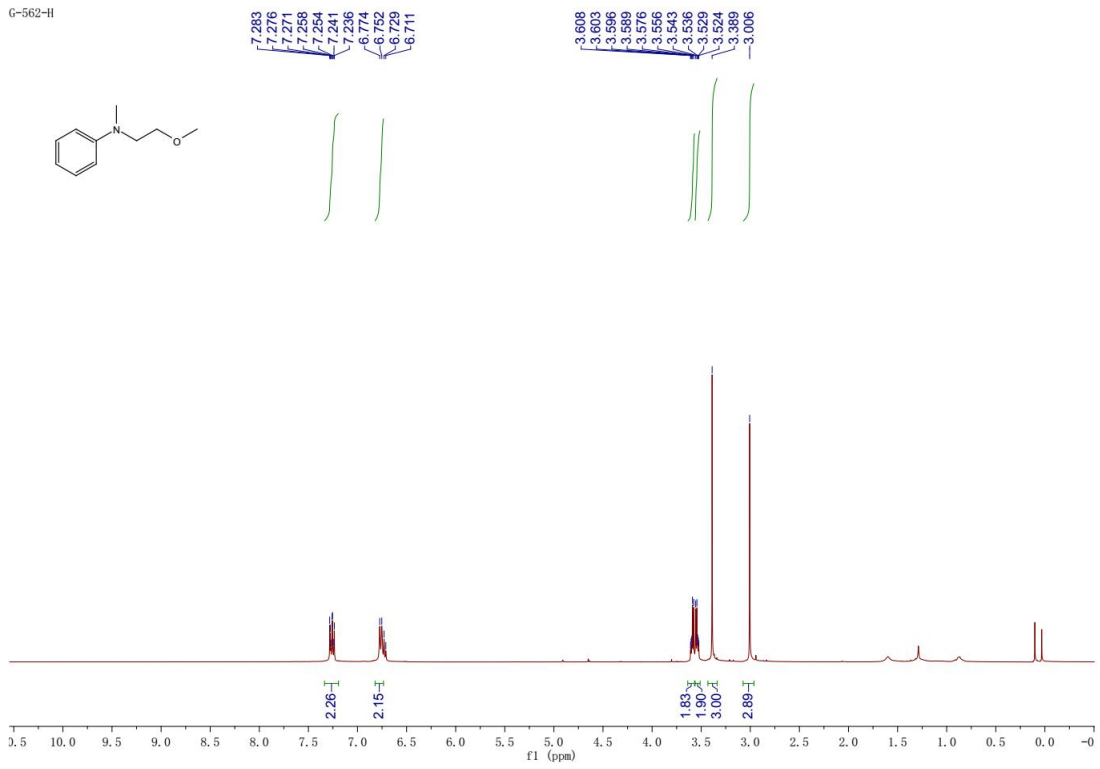

G-562

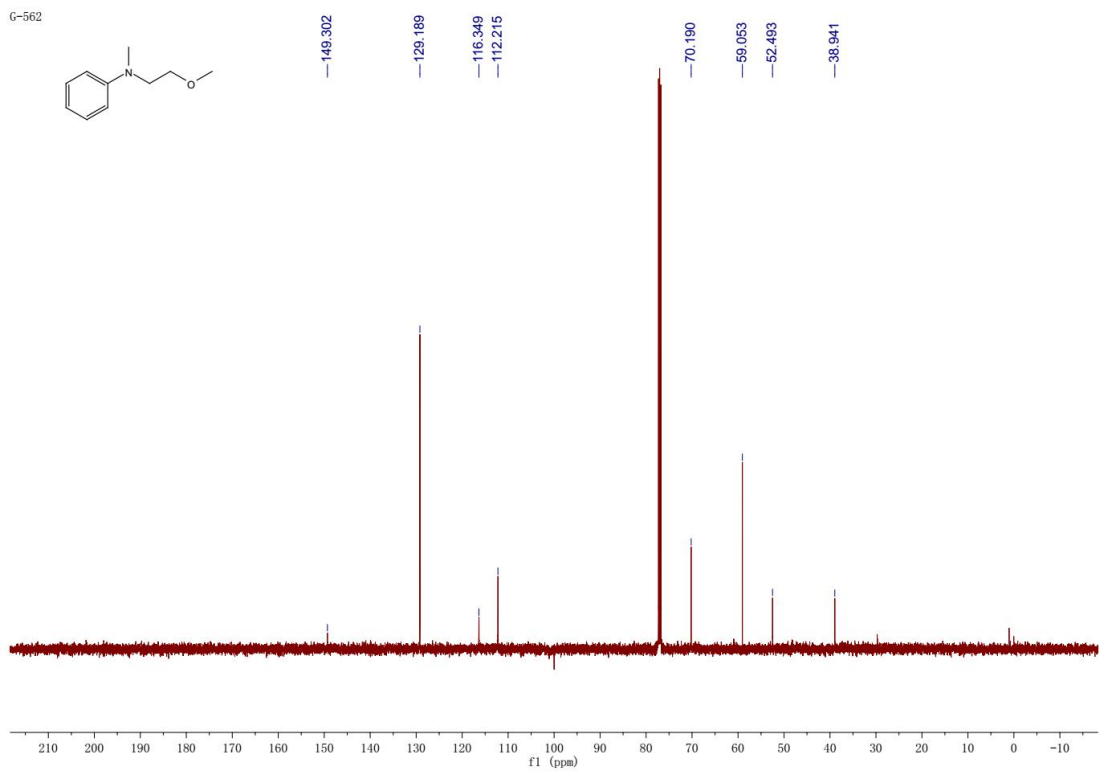

# NMR of 2j

LLM-G444-H

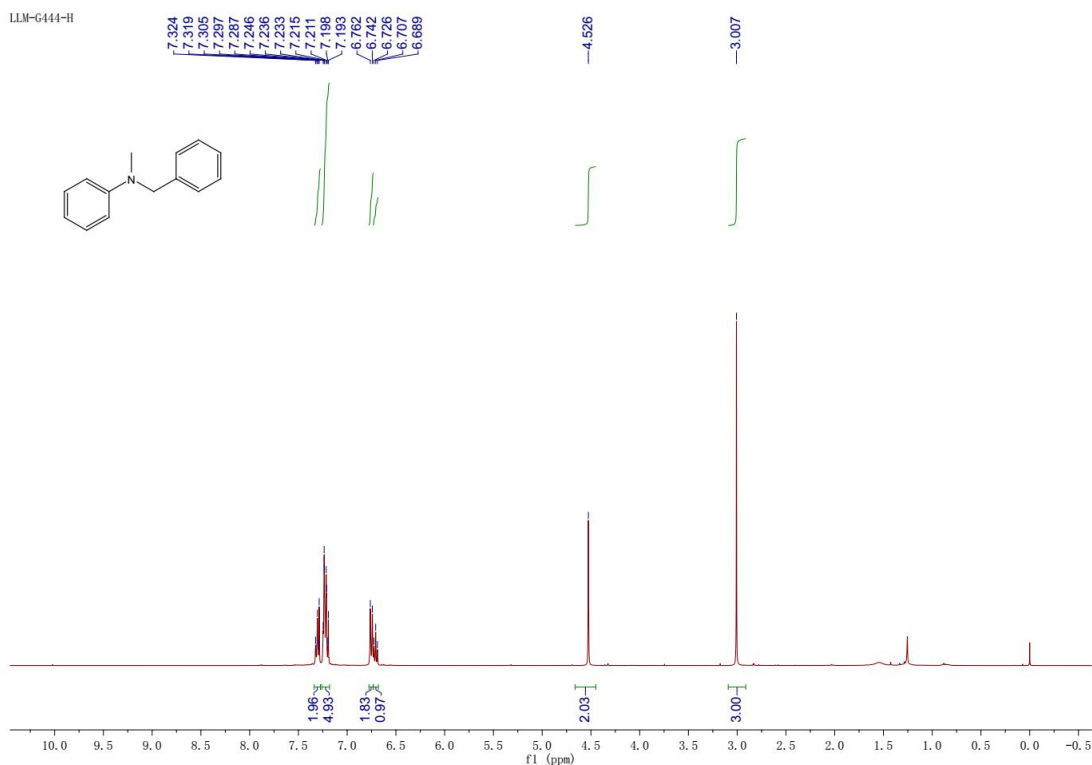

LLM-G444-C

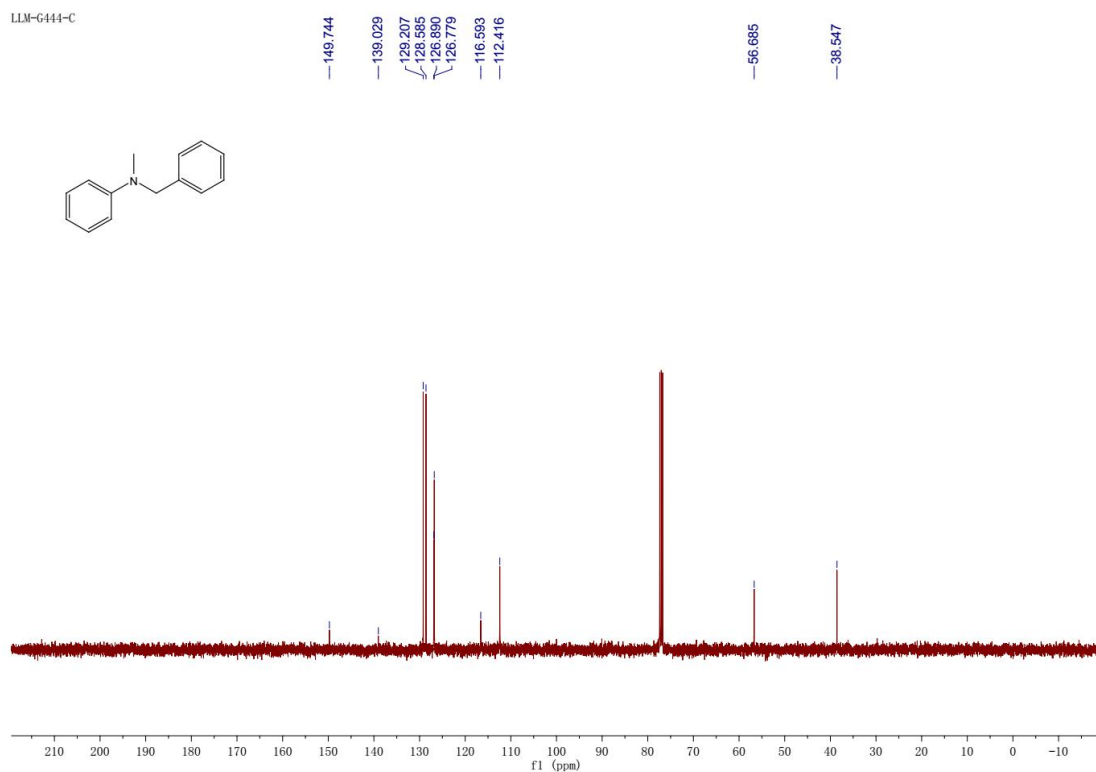

# NMR of 2k

K170-H

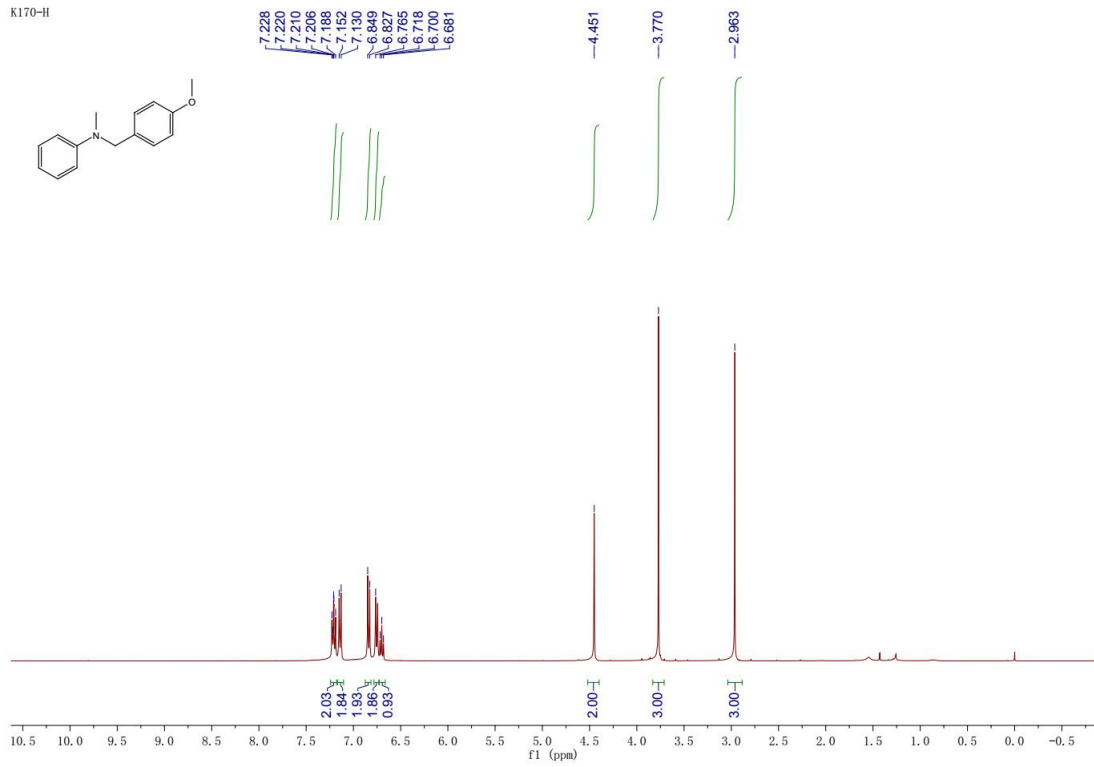

K170-C

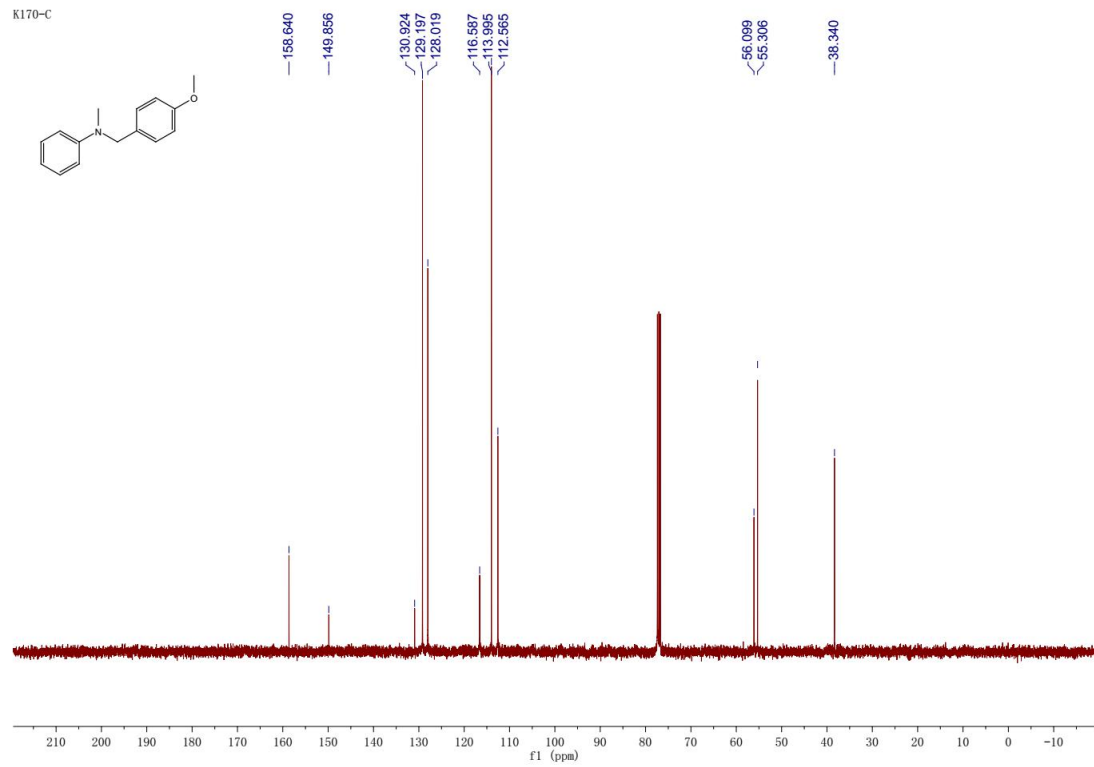

# NMR of 2l

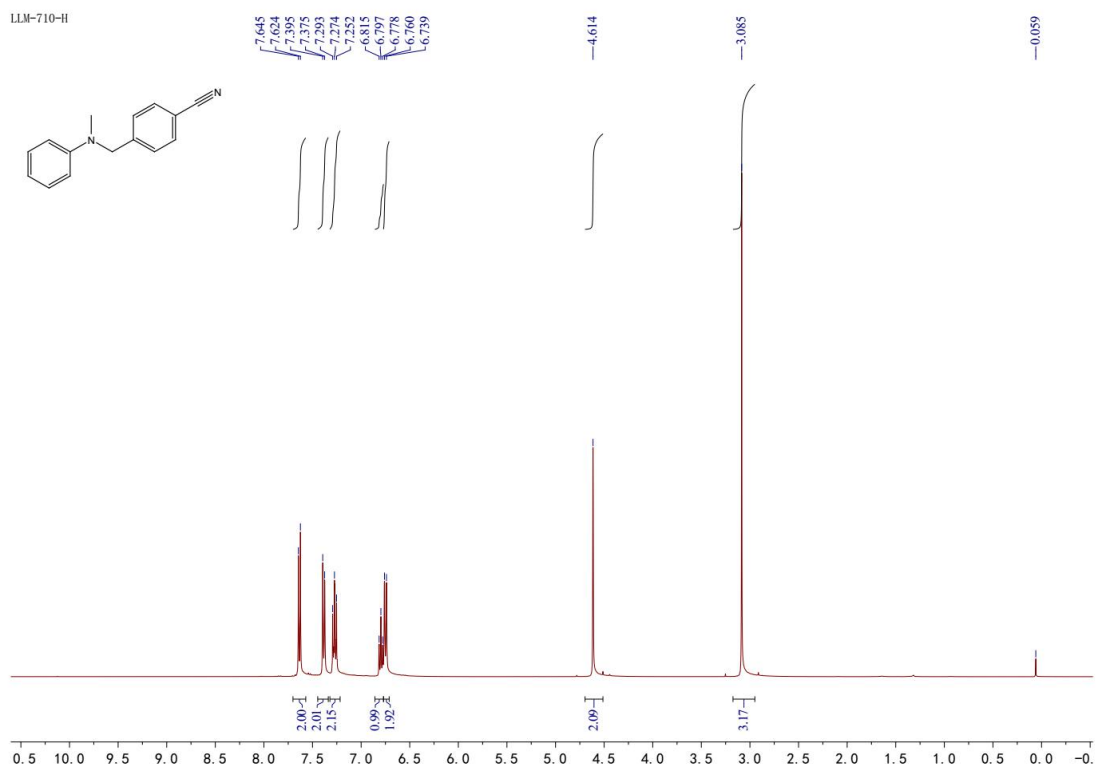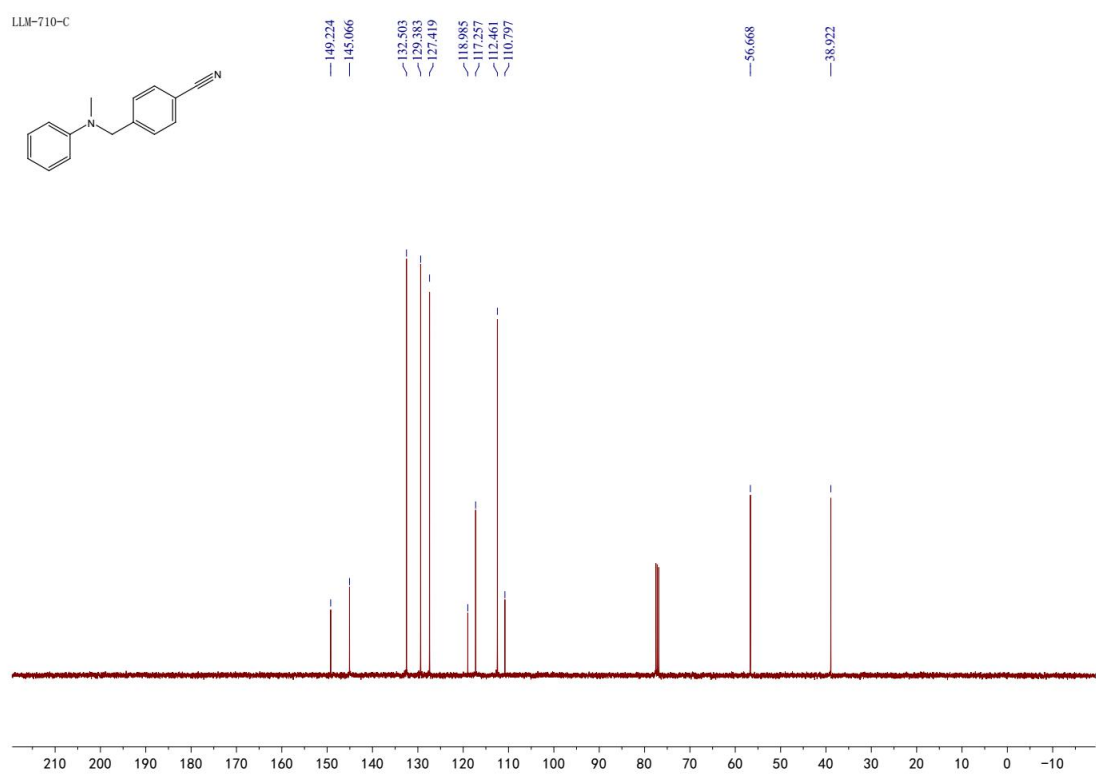

# NMR of 2m

K139-H

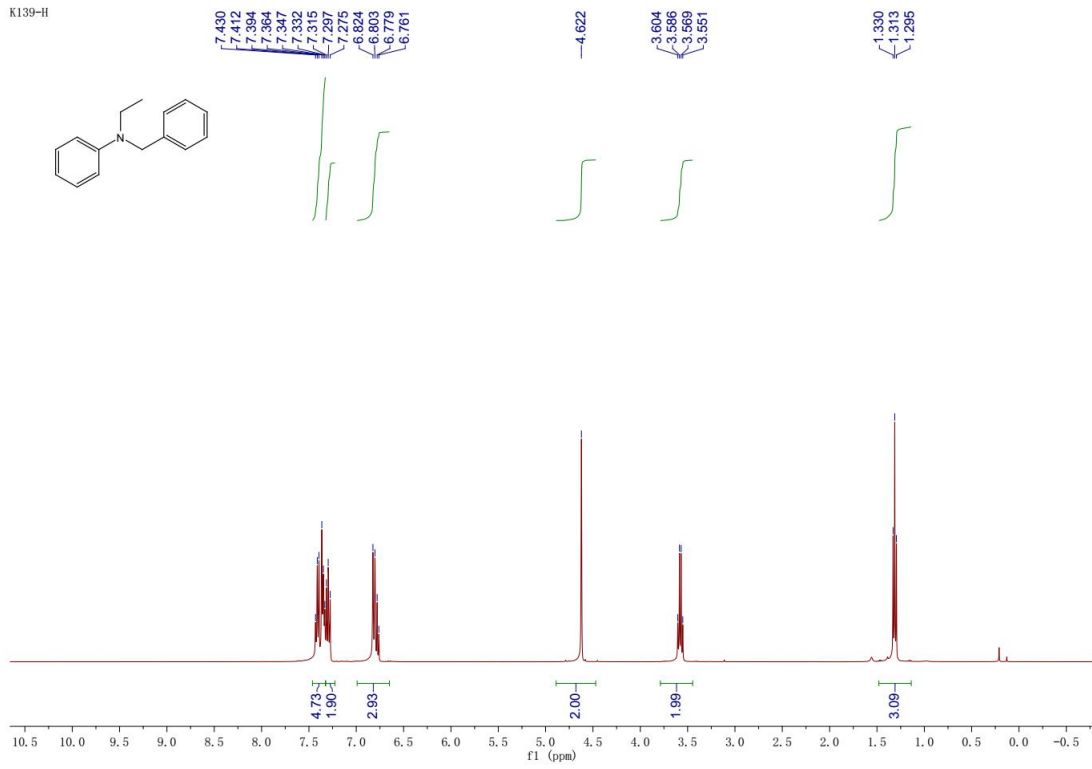

G474-1-2-C

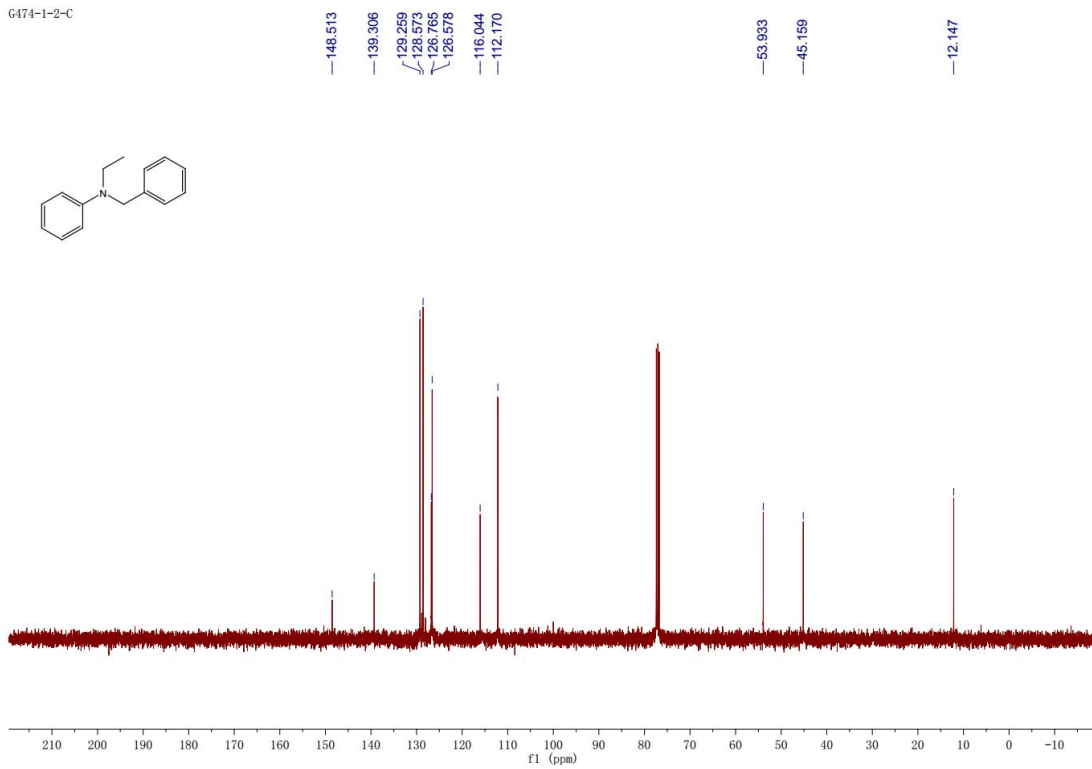

# NMR of 2n

K80-H

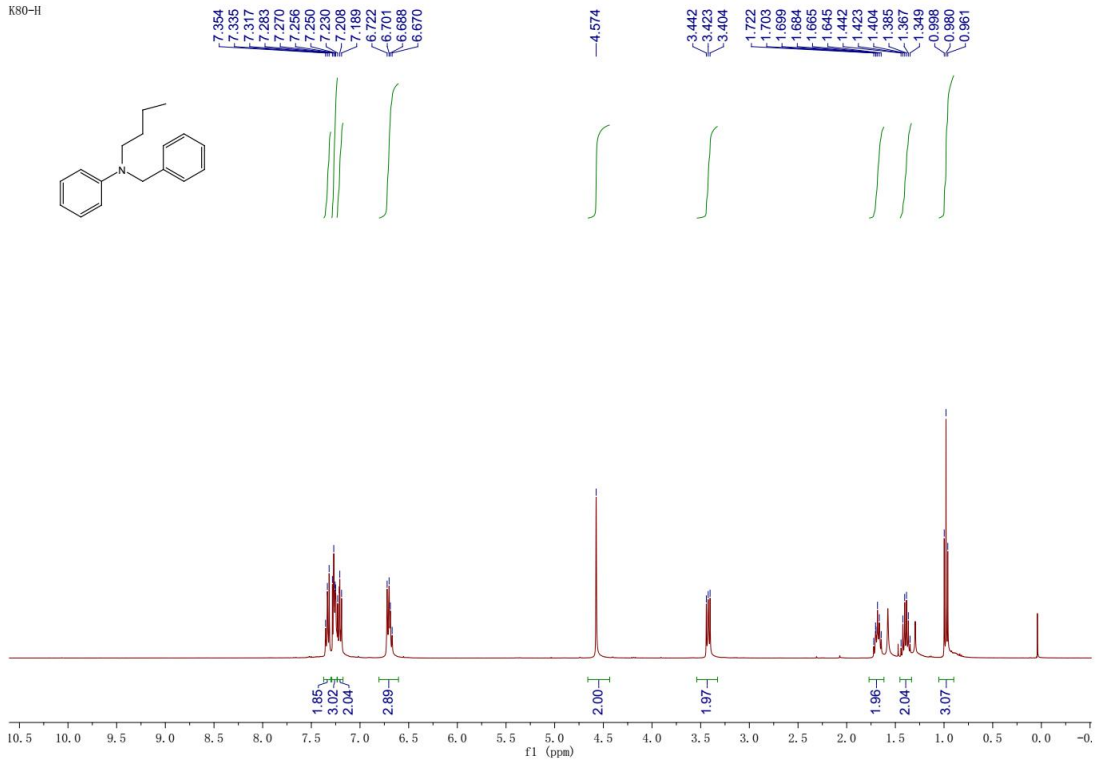

K81-C-0704

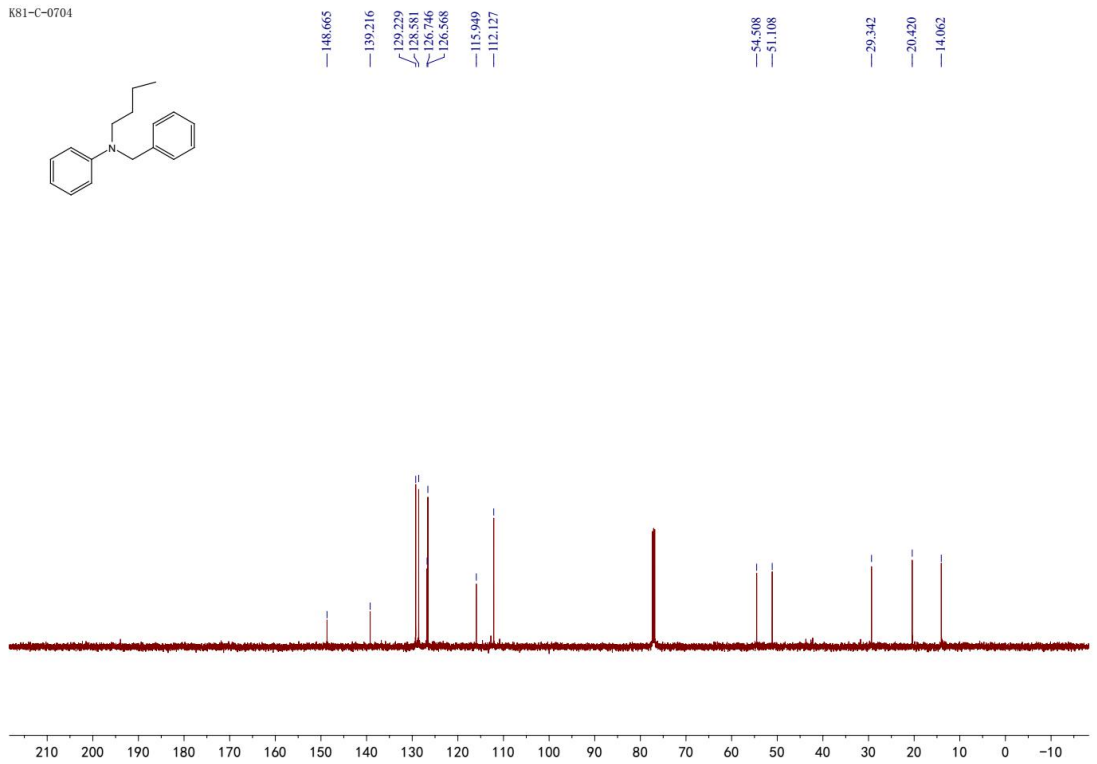

# NMR of 2o

K101-H

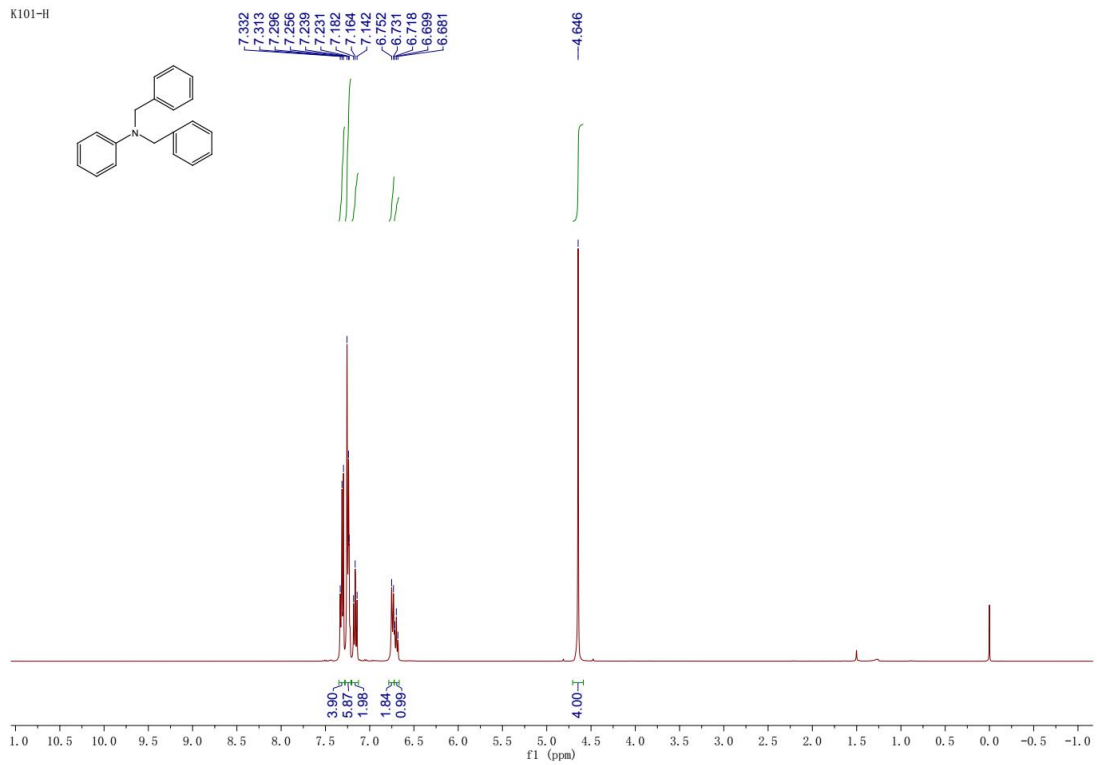

LLM-SBJ-C

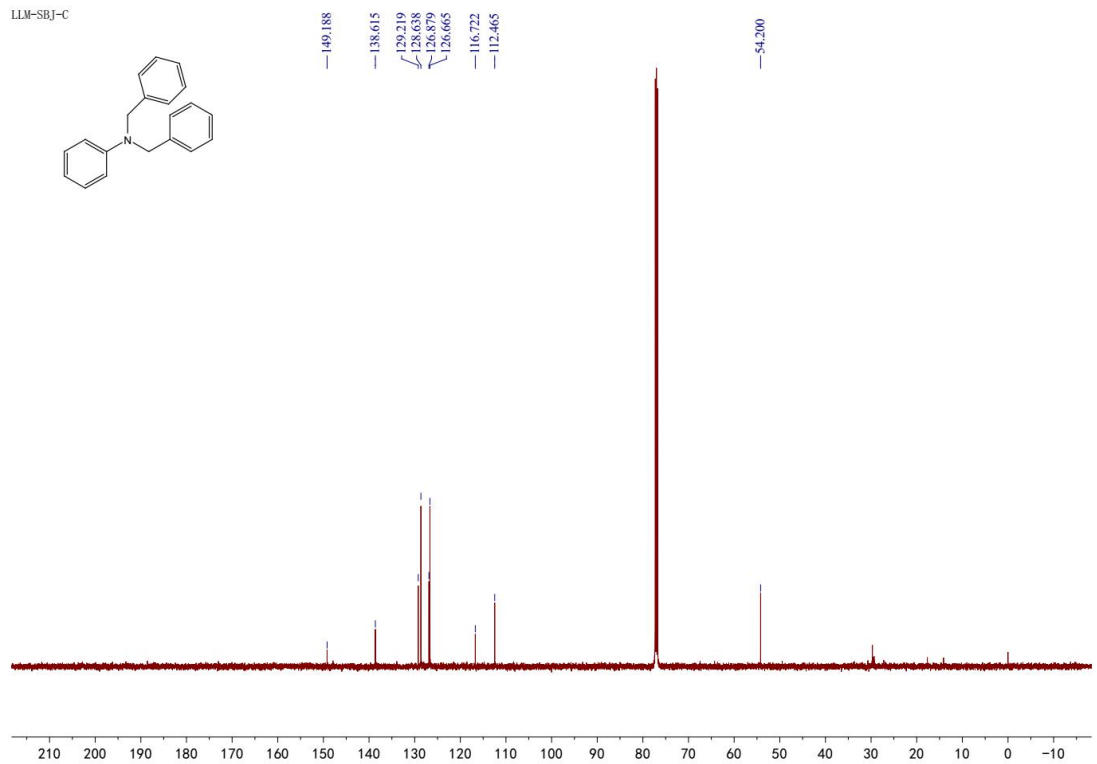

# NMR of 2p

LLM-S0-H

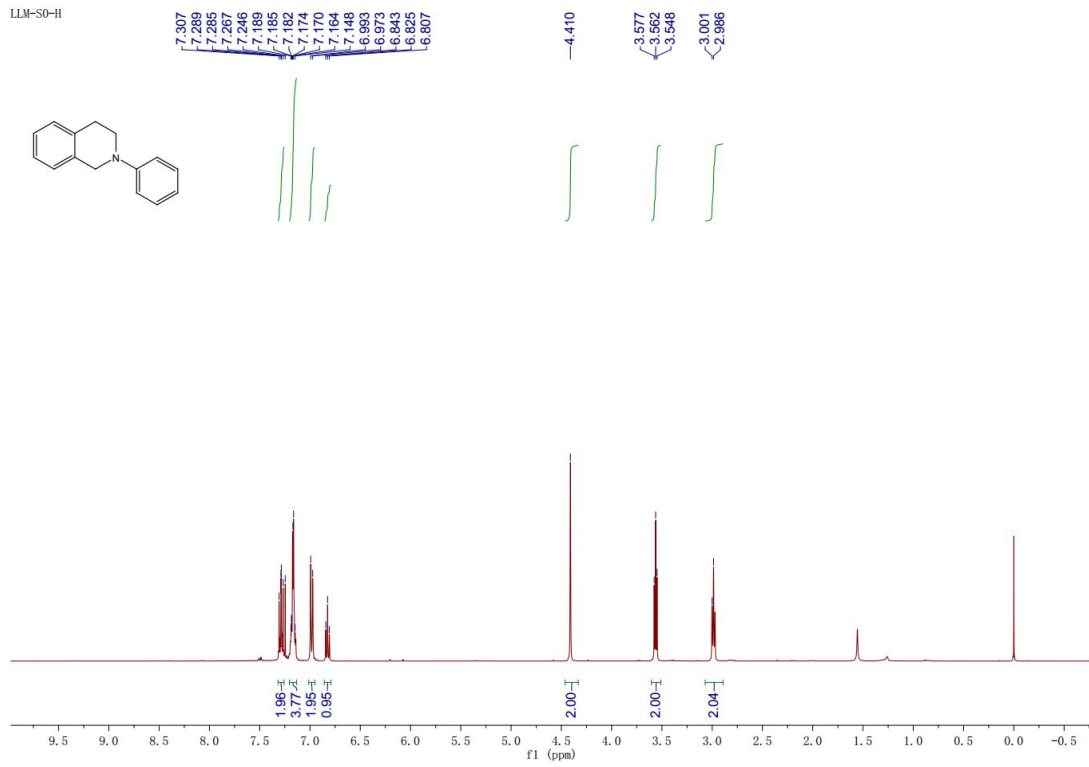

LLM-S0-C

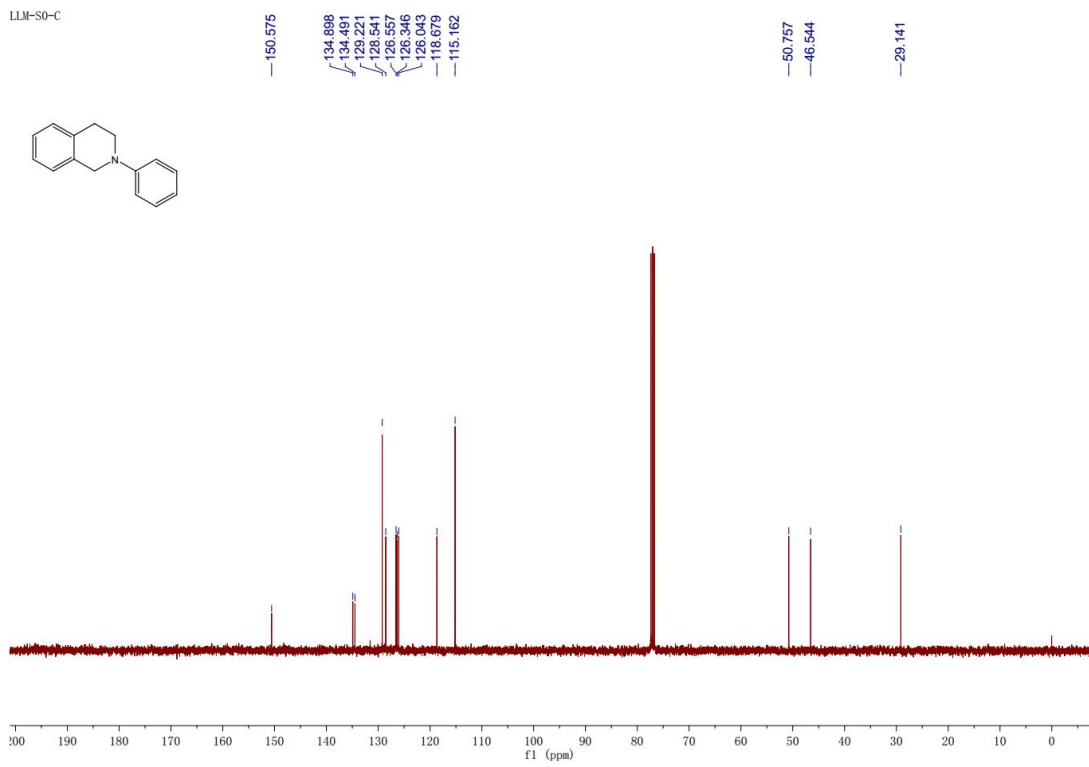



# NMR of 2aa

LLM-G454-H

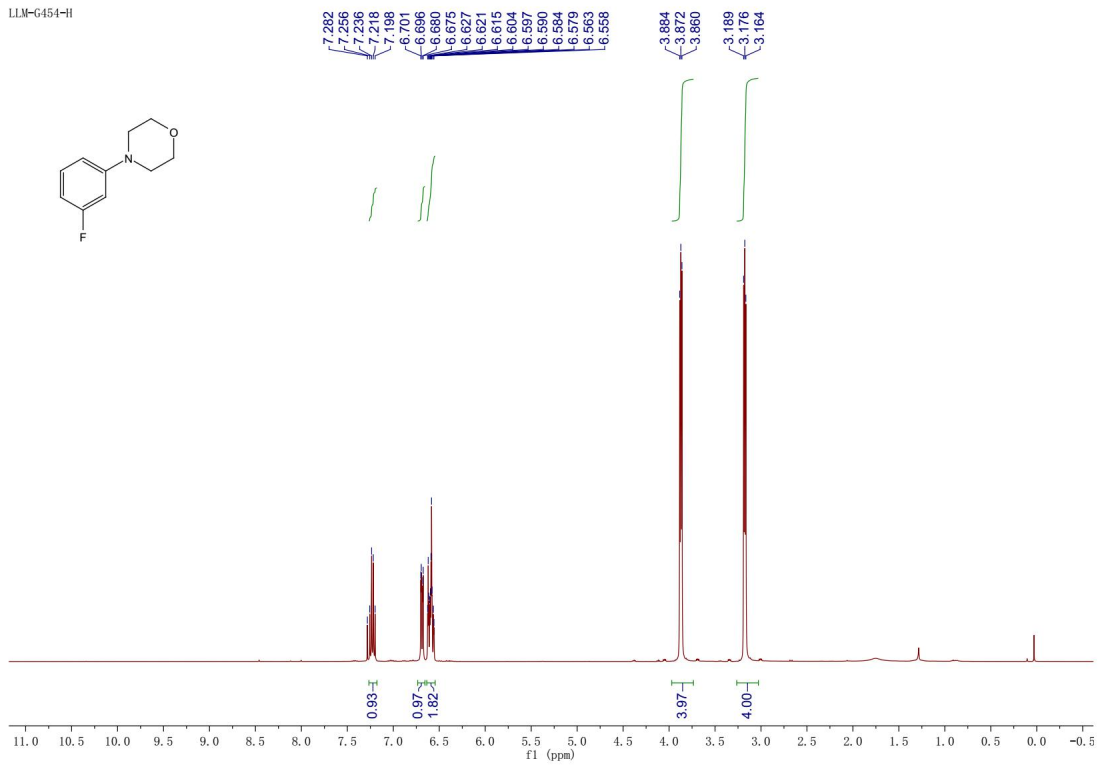

LLM-G454-0321-2-C

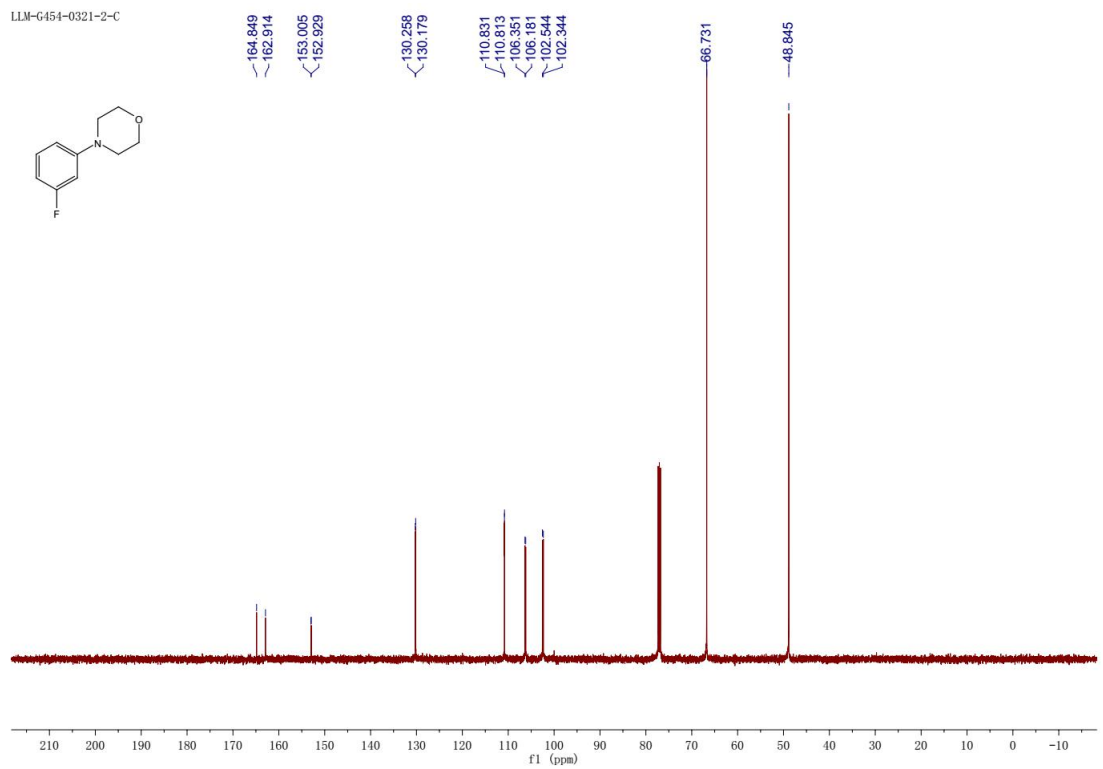

# NMR of 2ab

C466-H

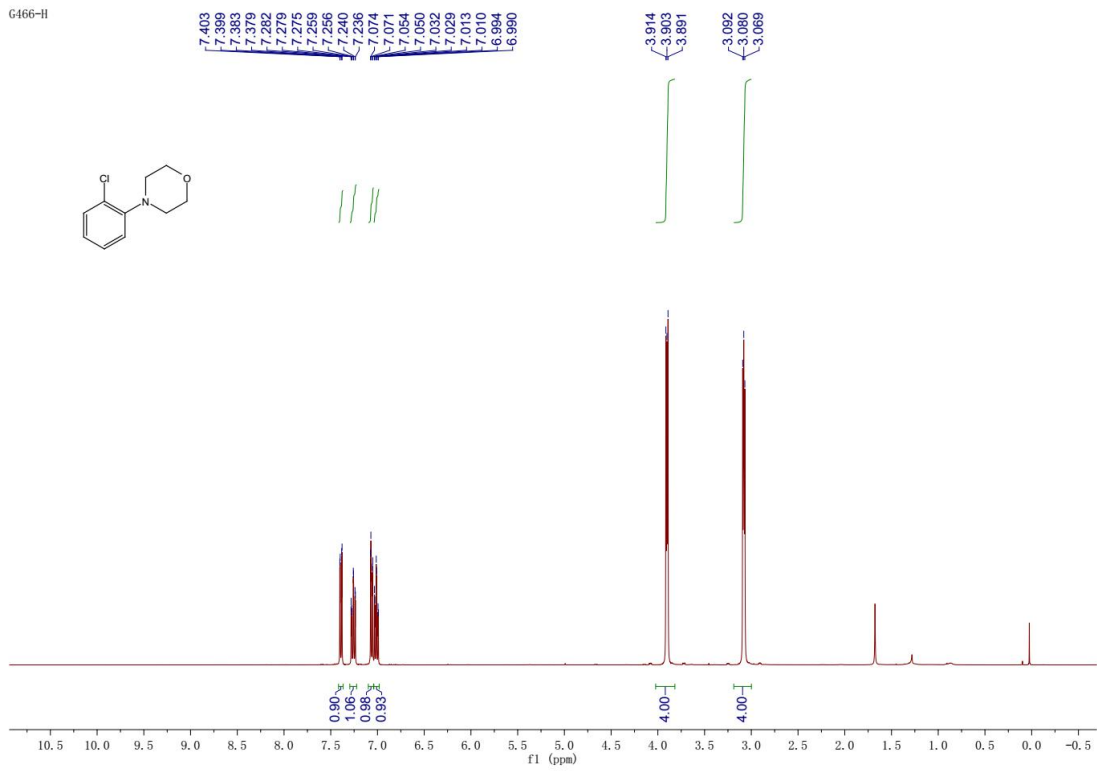

C466-C

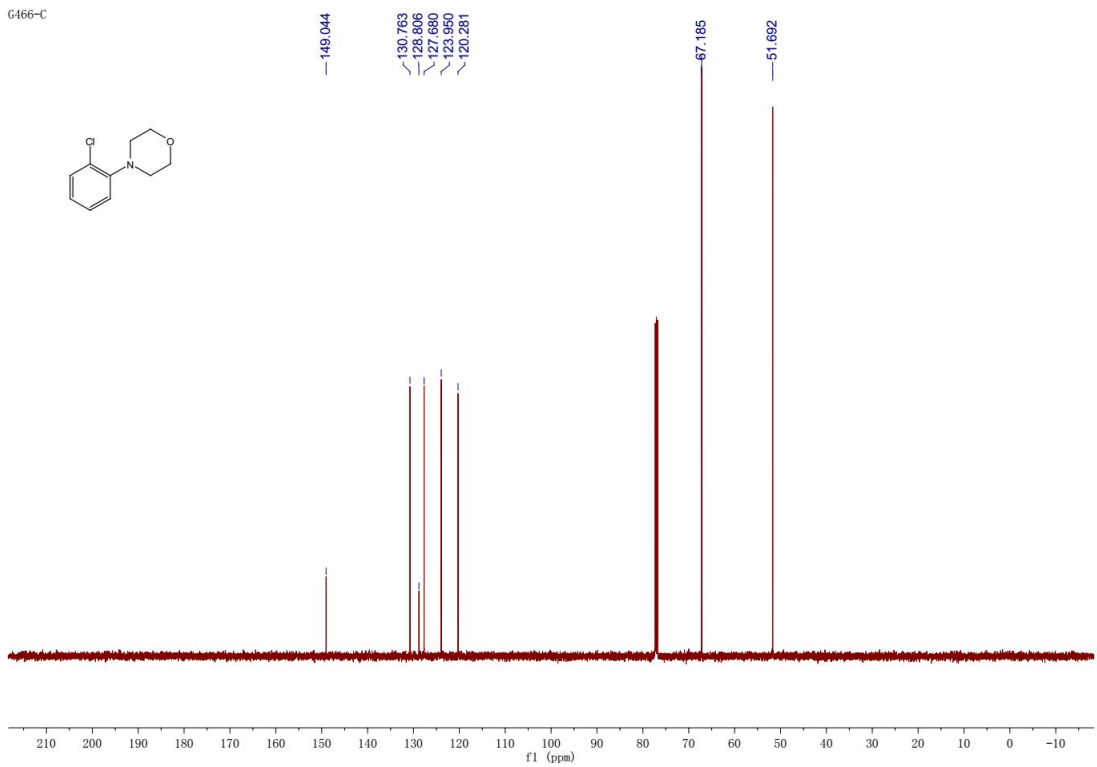

# NMR of 2ac

LLM-G453-H

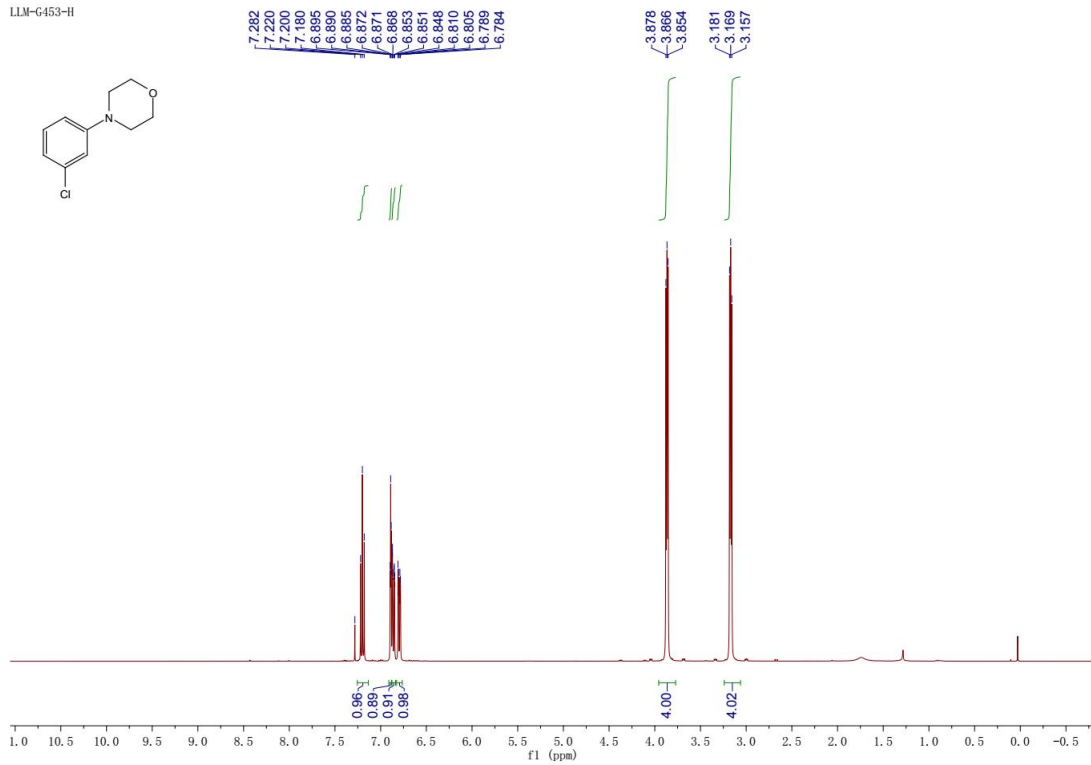

LLM-G453-C

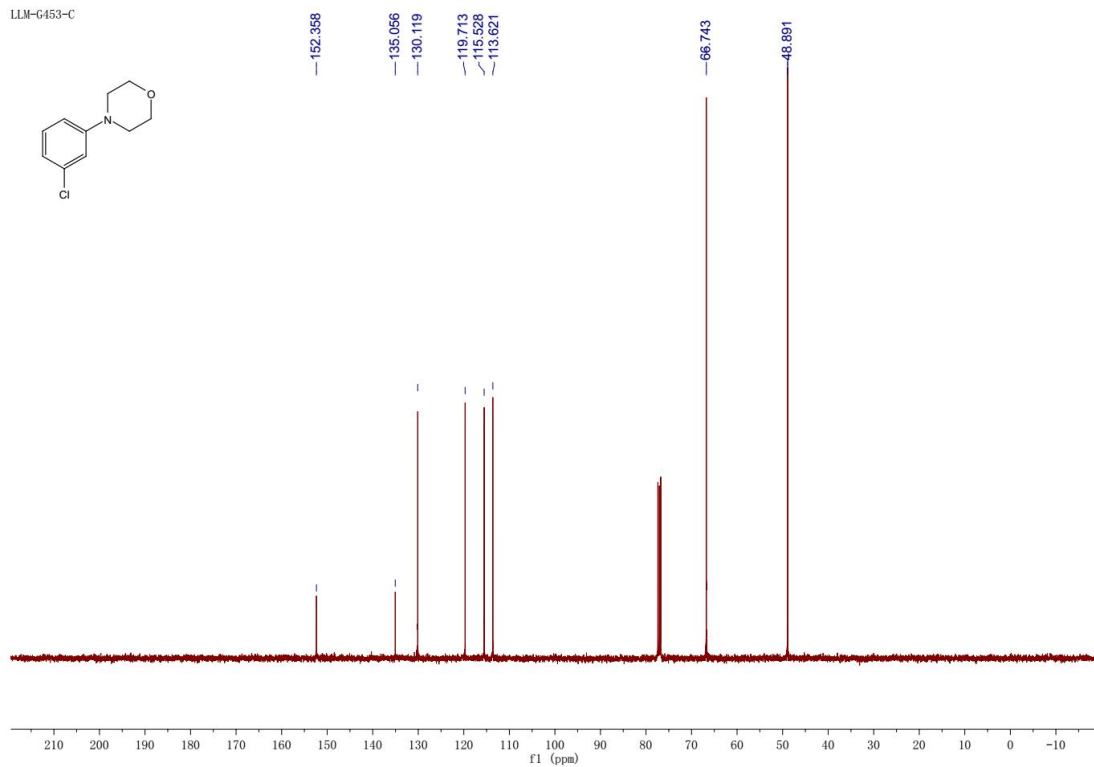

# NMR of 2ad

G508-II

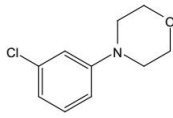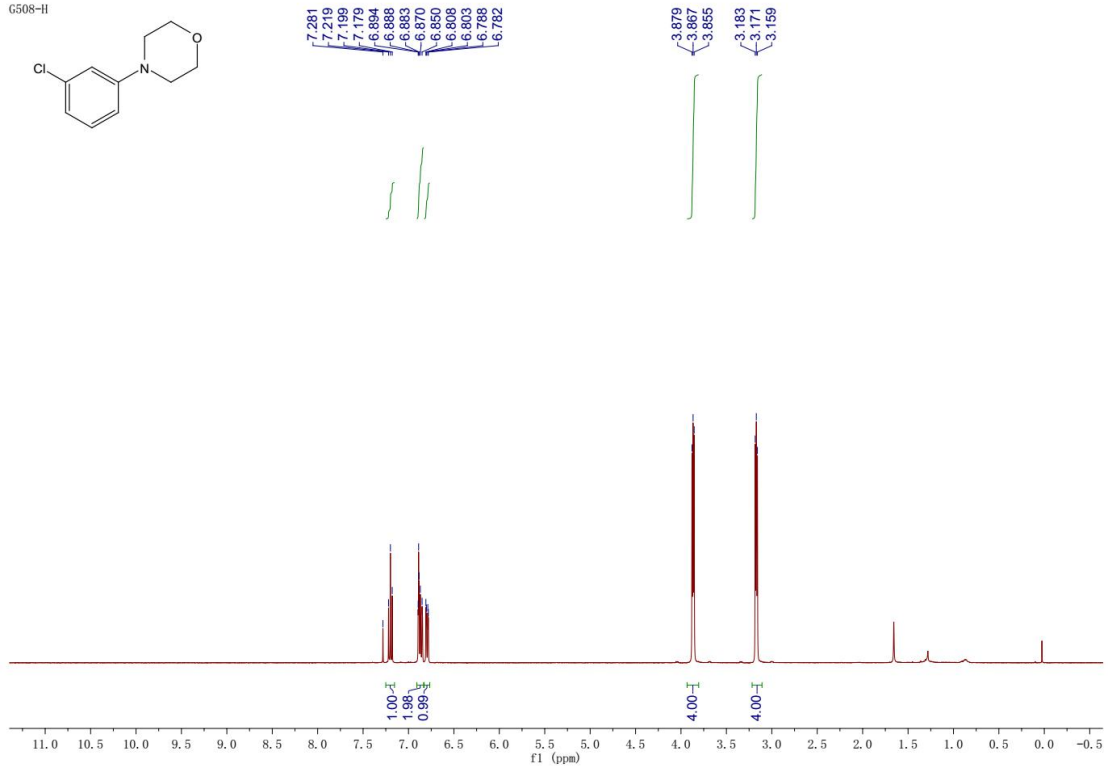

G508-C

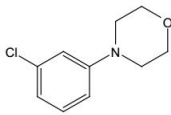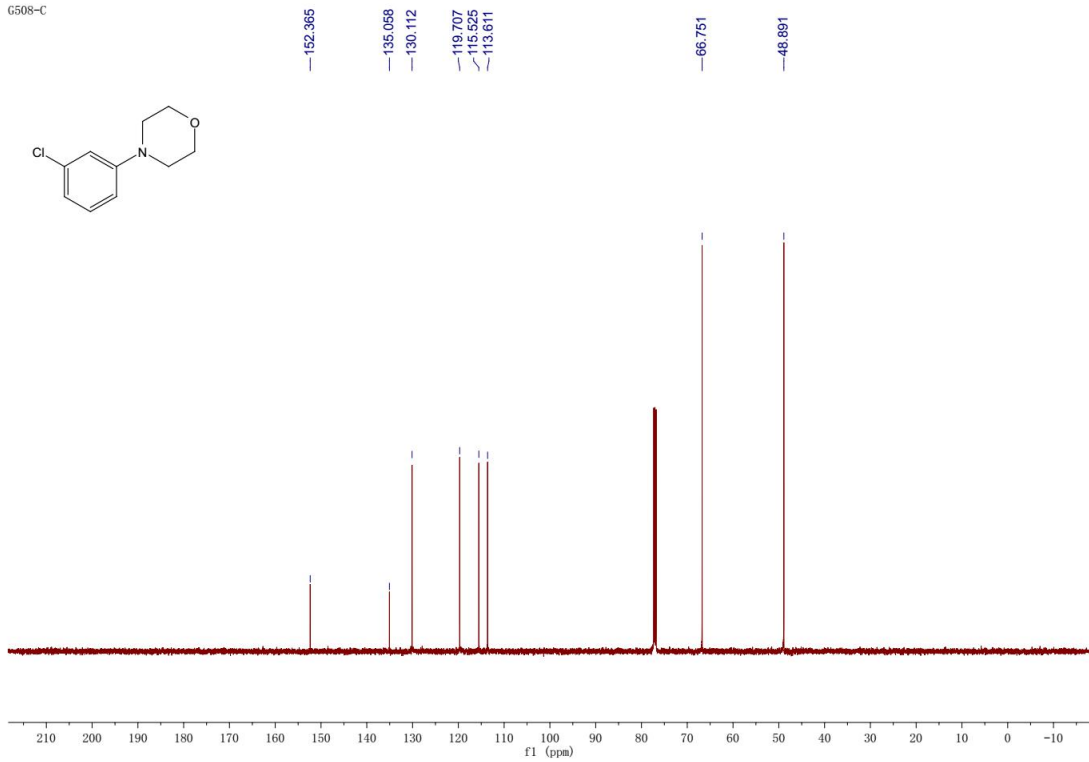

# NMR of 2ae

LLM-G342-H

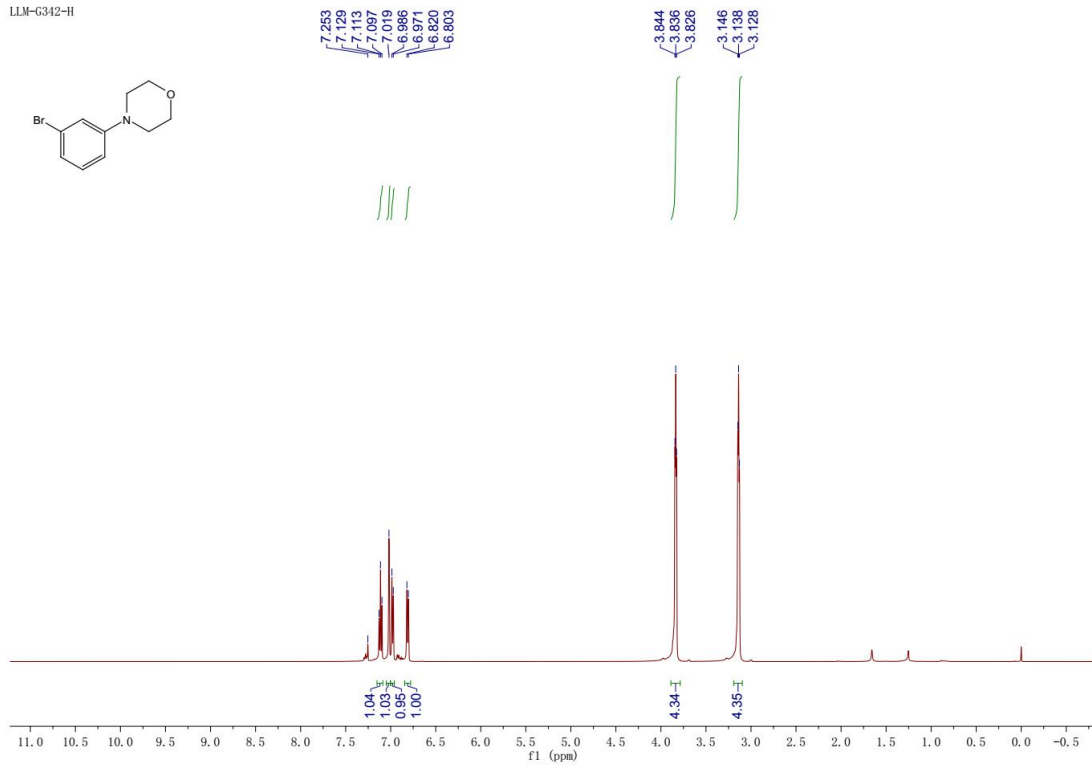

LLM-G342-C

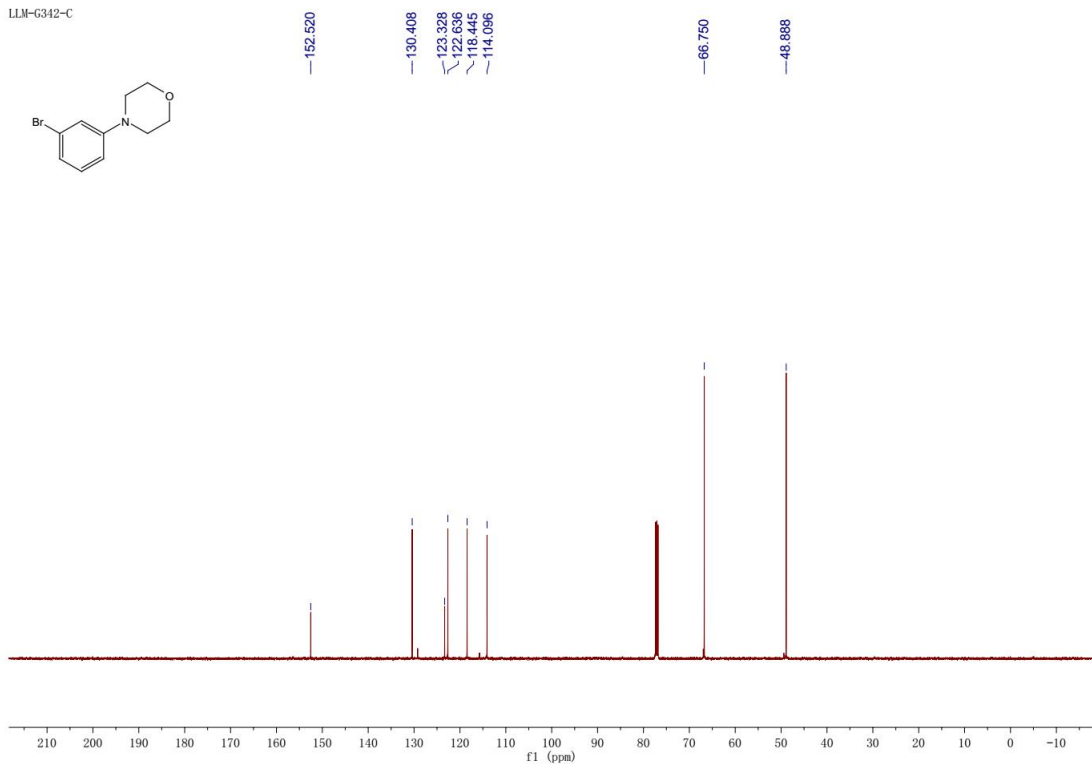

# NMR of 2af

LLM-G330-H

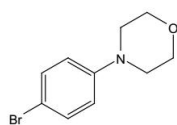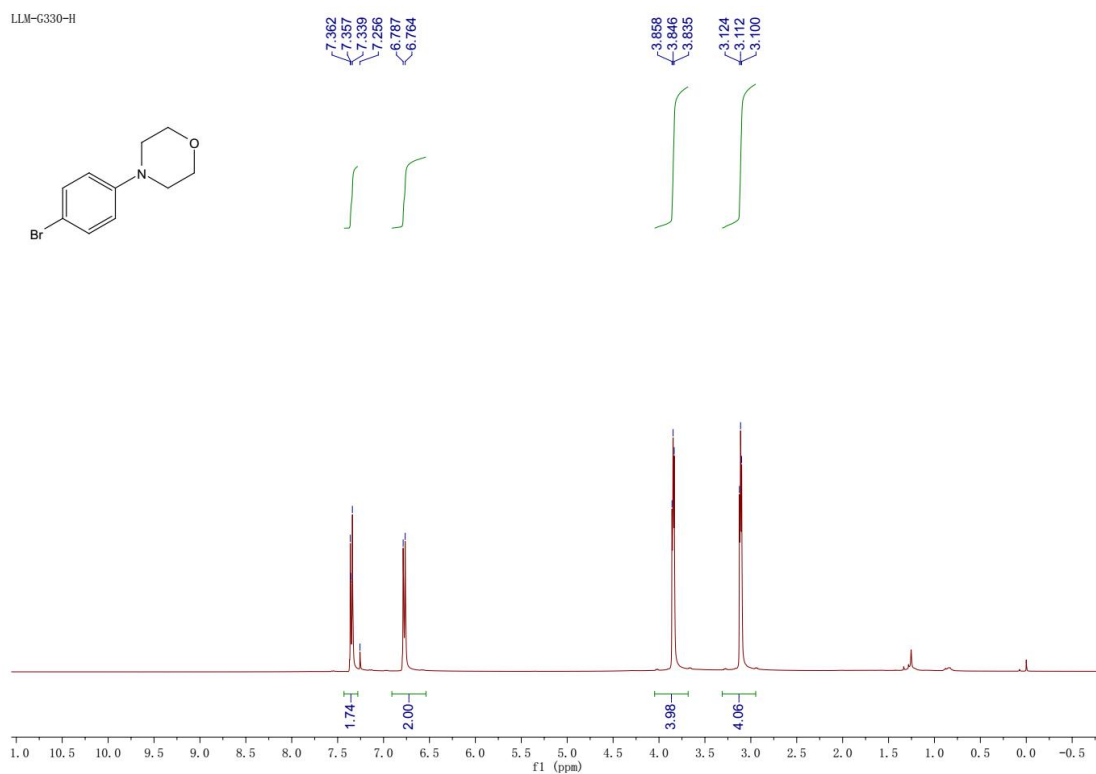

LLM-G330-C

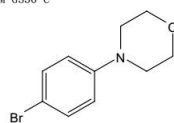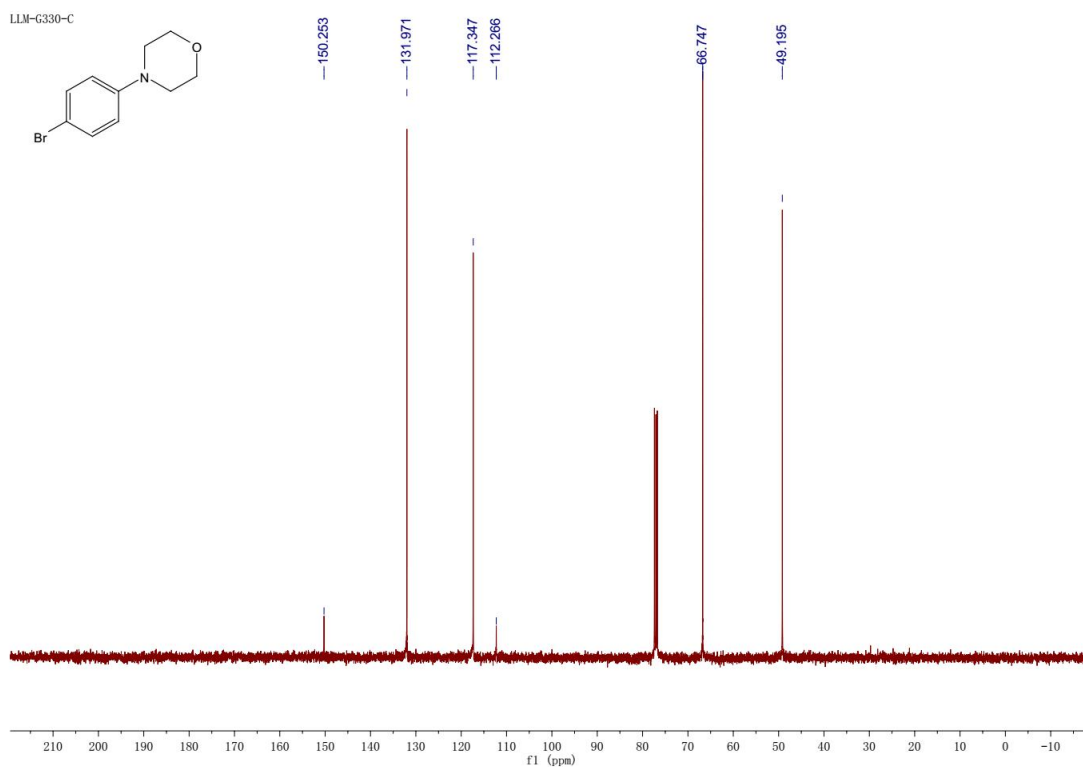

# NMR of 2ag

G463-H

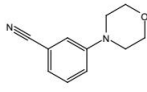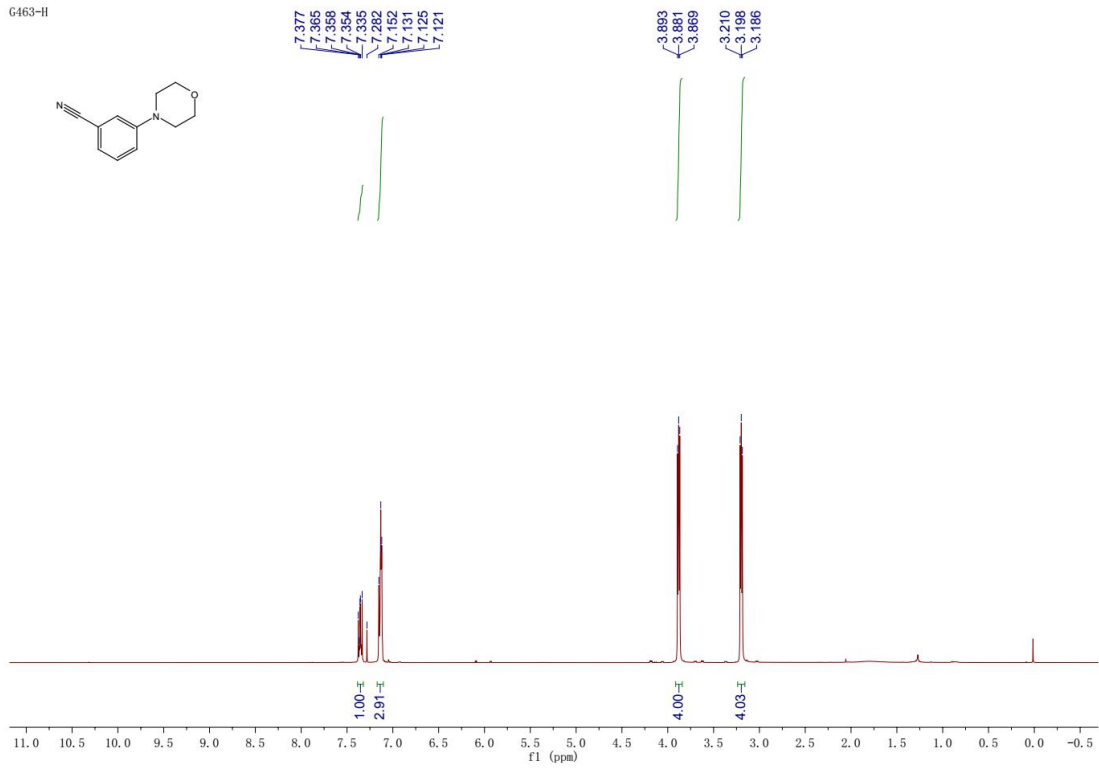

G463-C

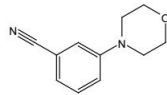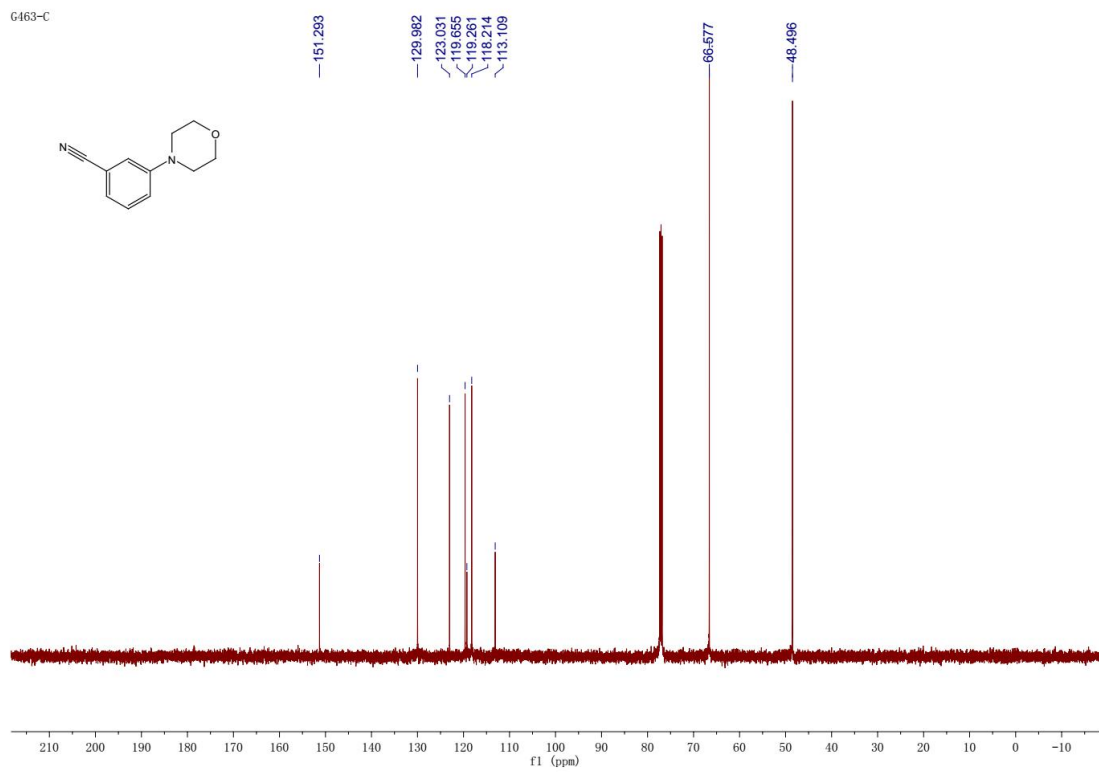

# NMR of 2ah

K171-H

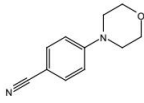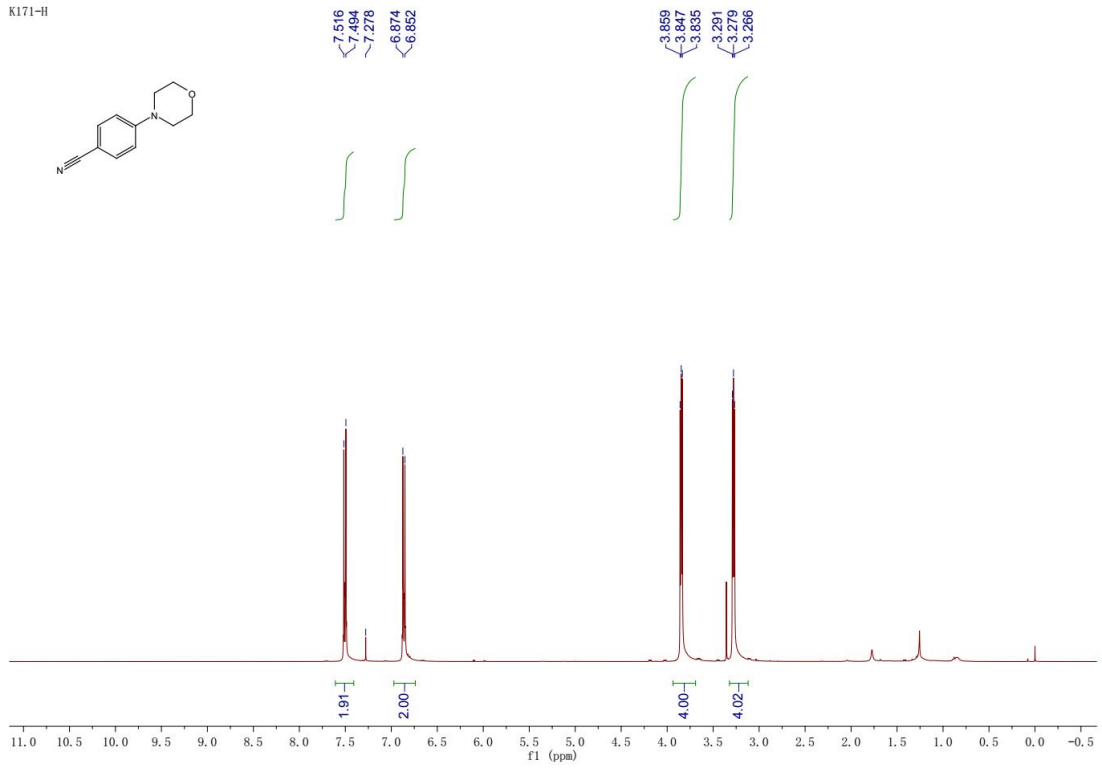

K171-C

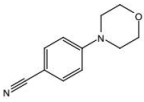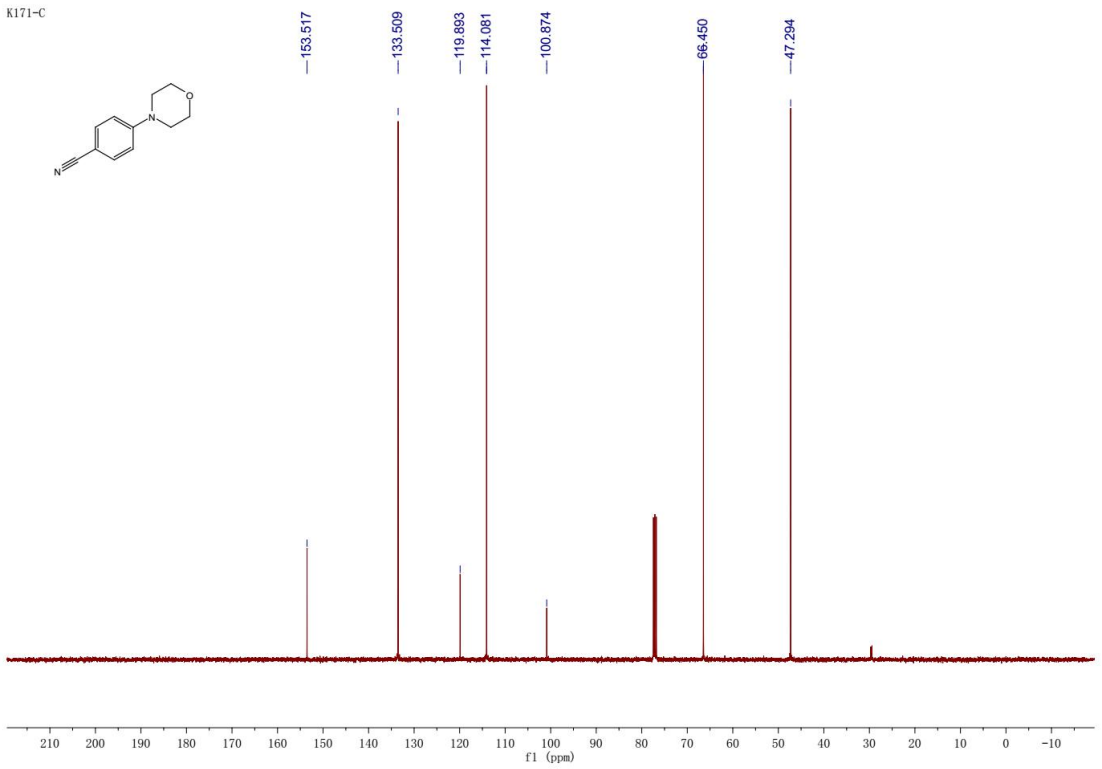



# NMR of 2ai

G507-H

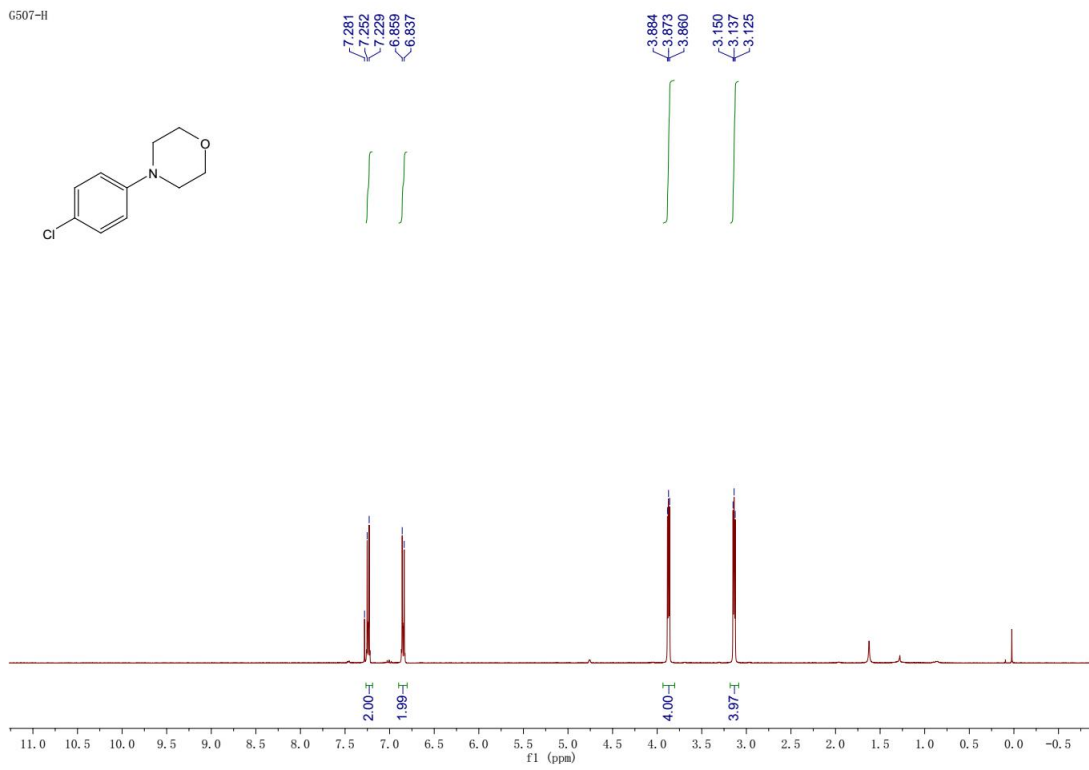

G507-C

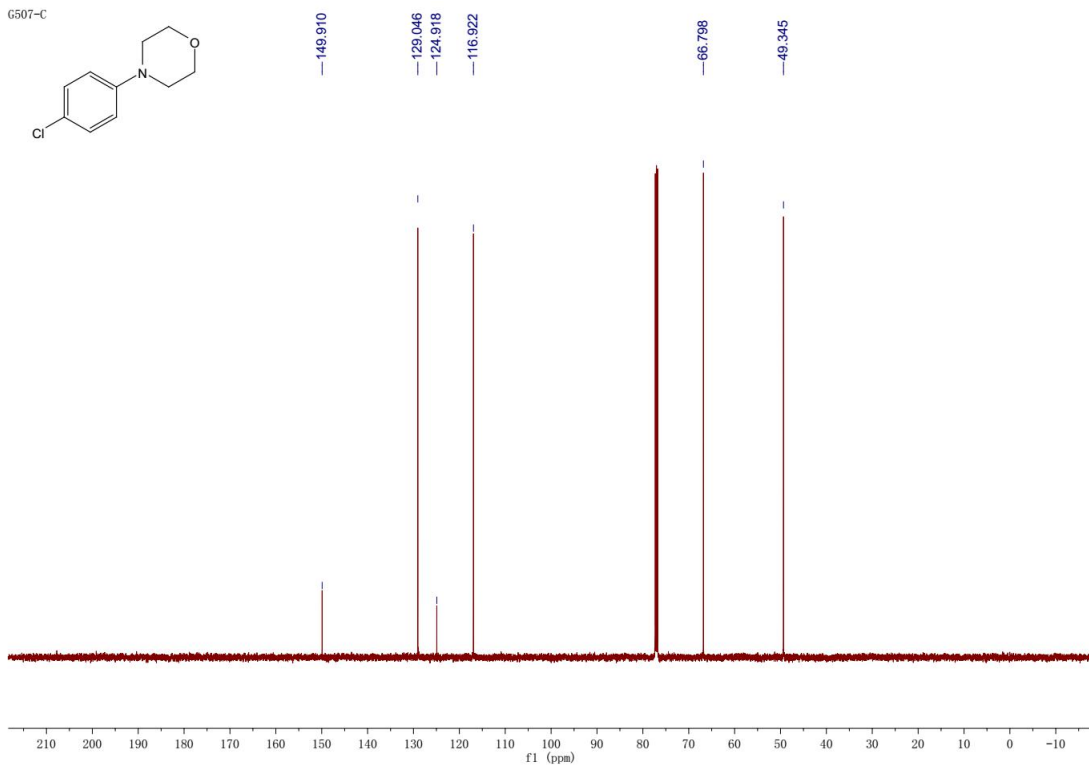

# NMR of 2aj

G488-II

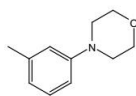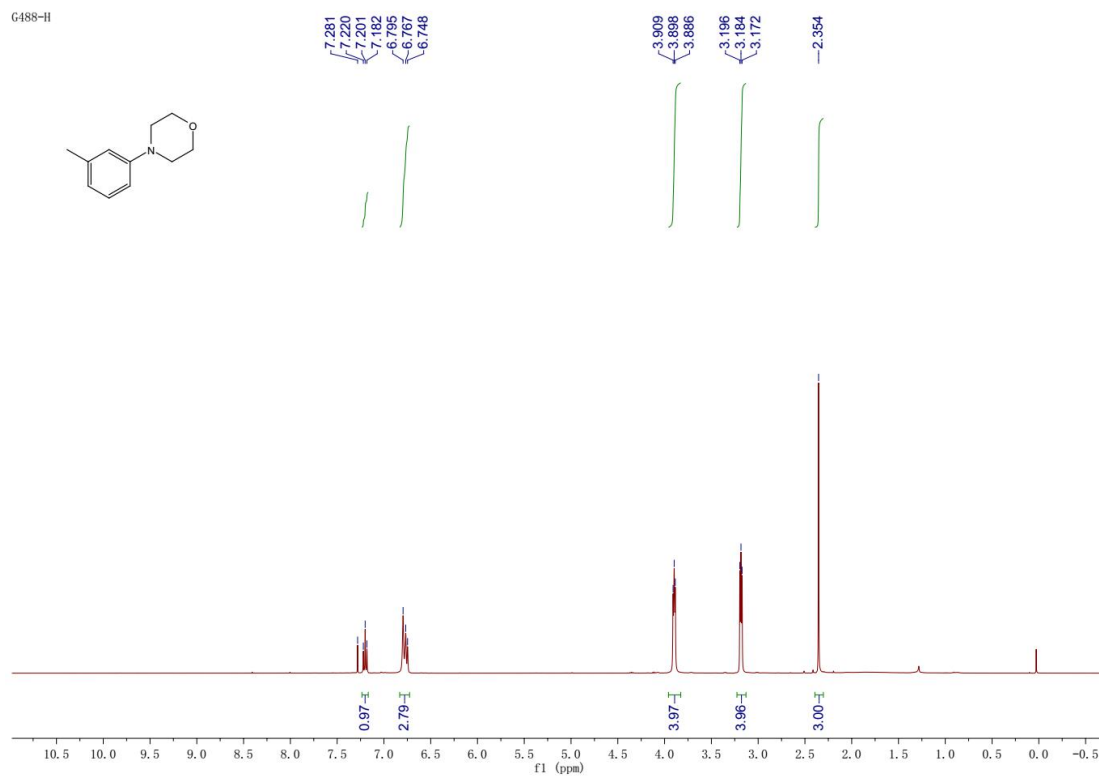

G481-C

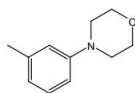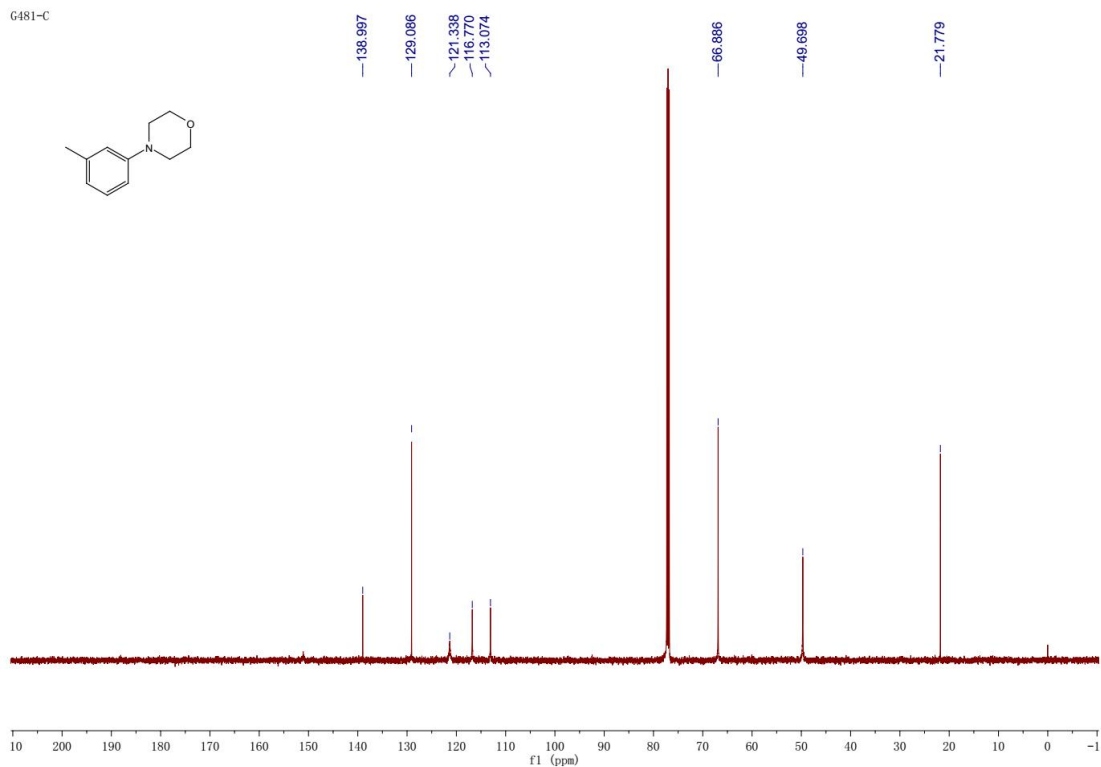

# NMR of 2ak

K164-1-H

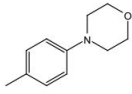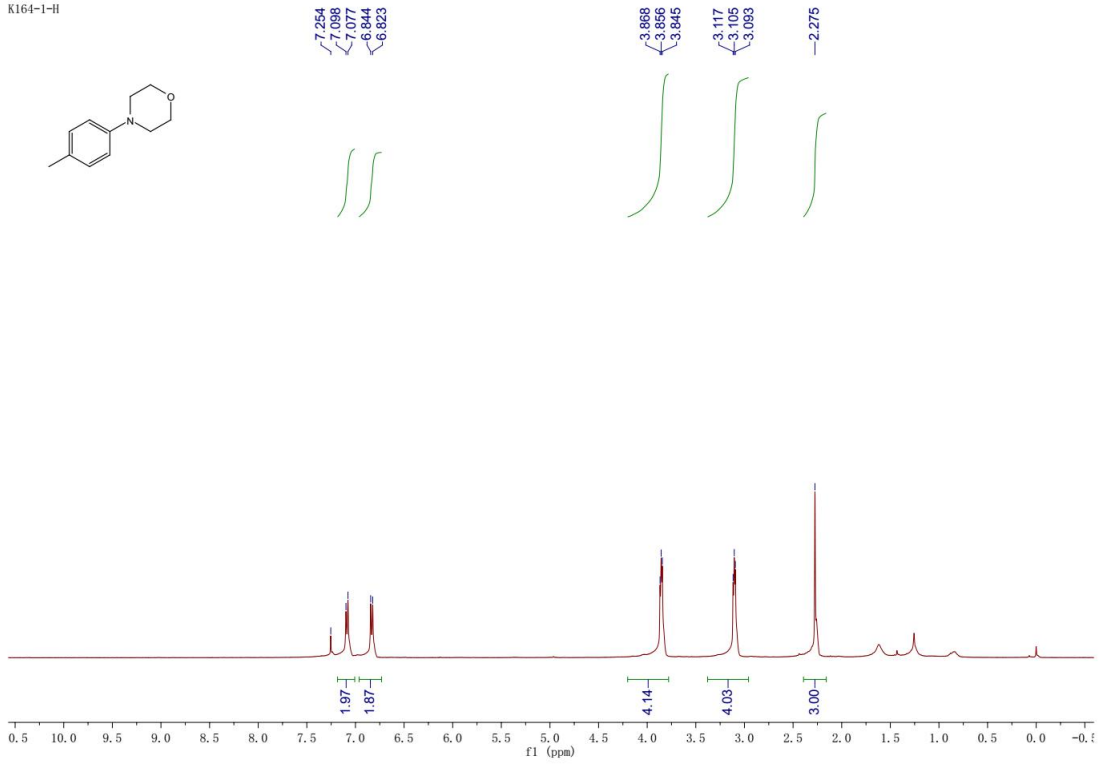

K164-1-0820-C

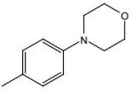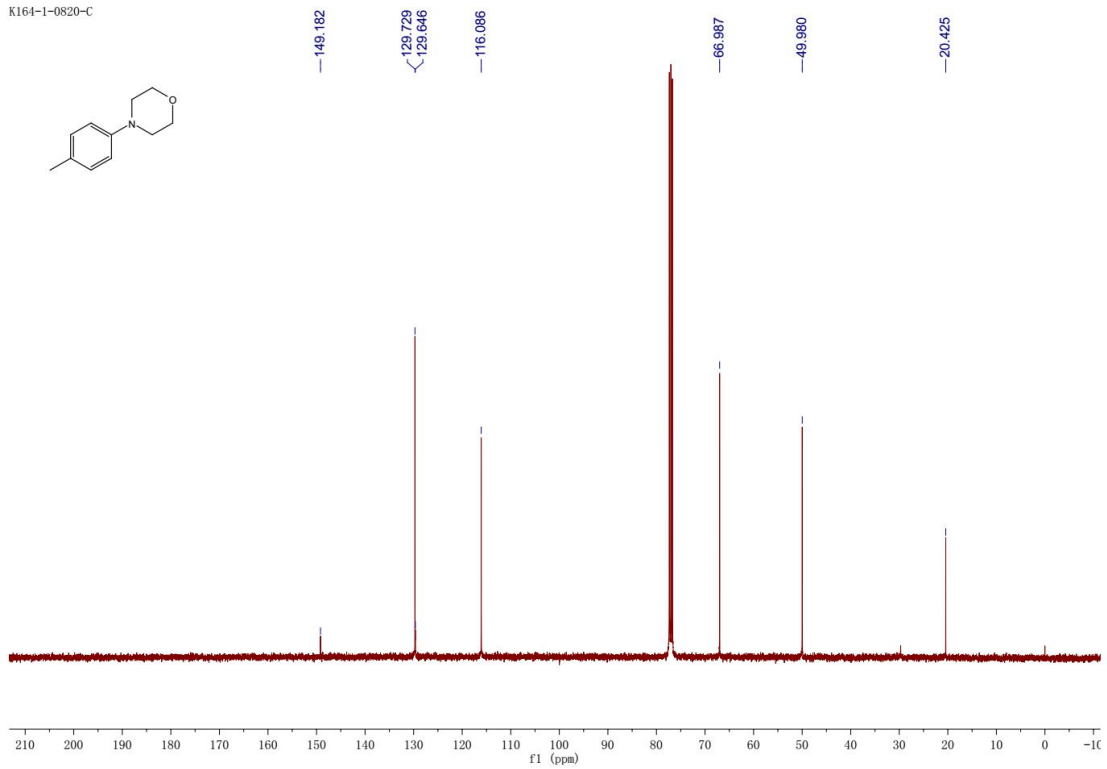

# NMR of 2aI

G439-H

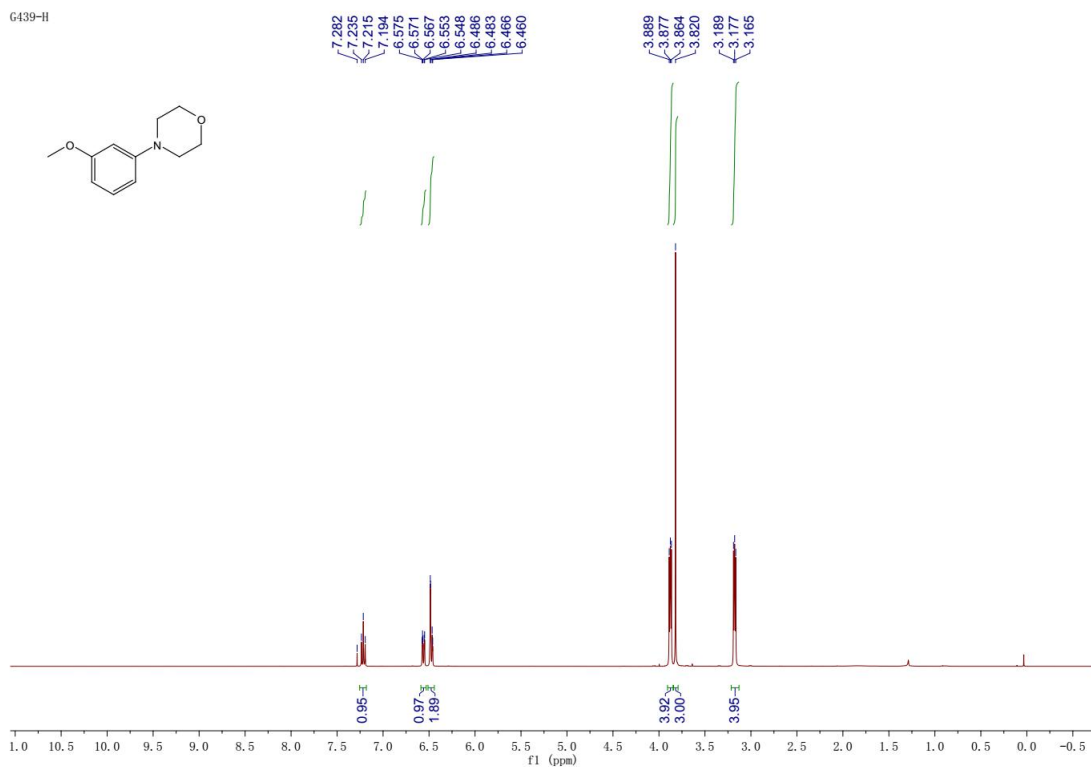

LLM-G439-C

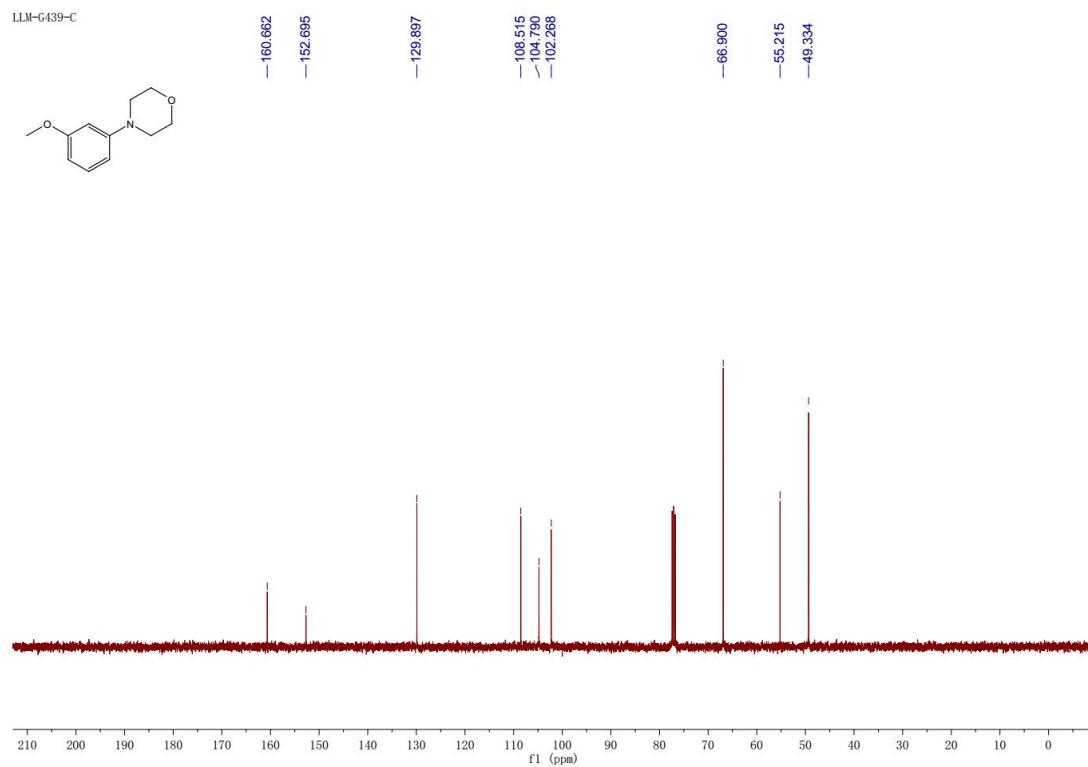

# NMR of 2ao

K153-H

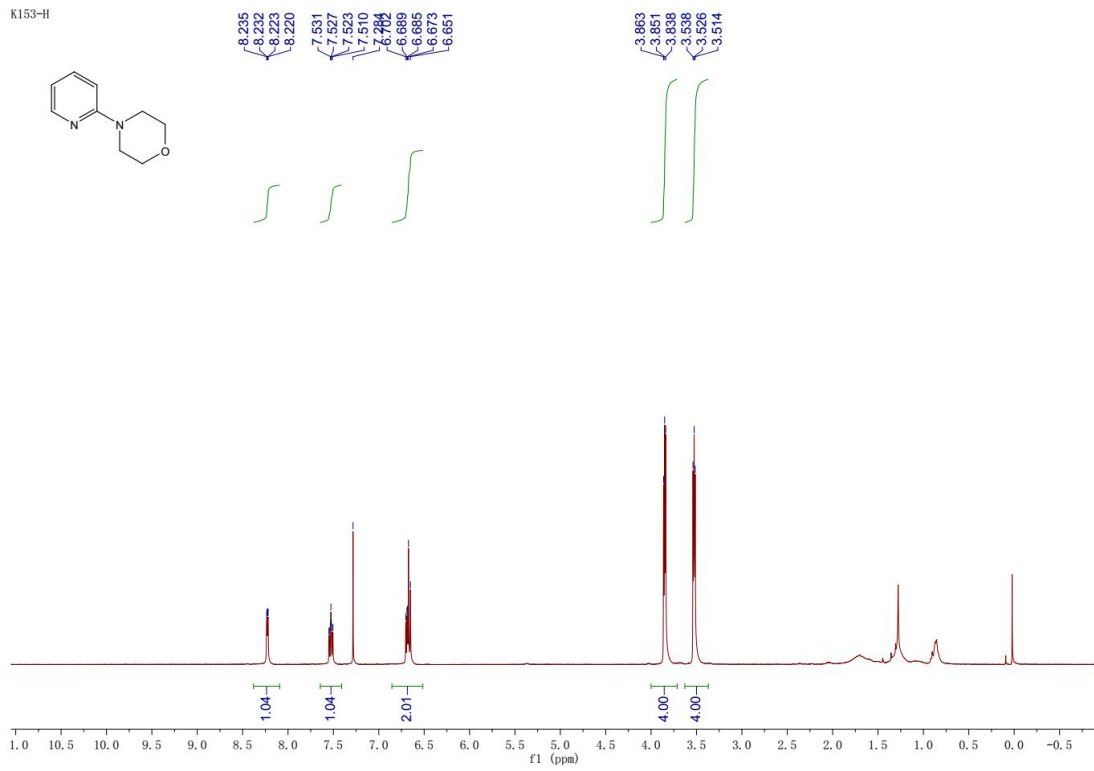

K153-C

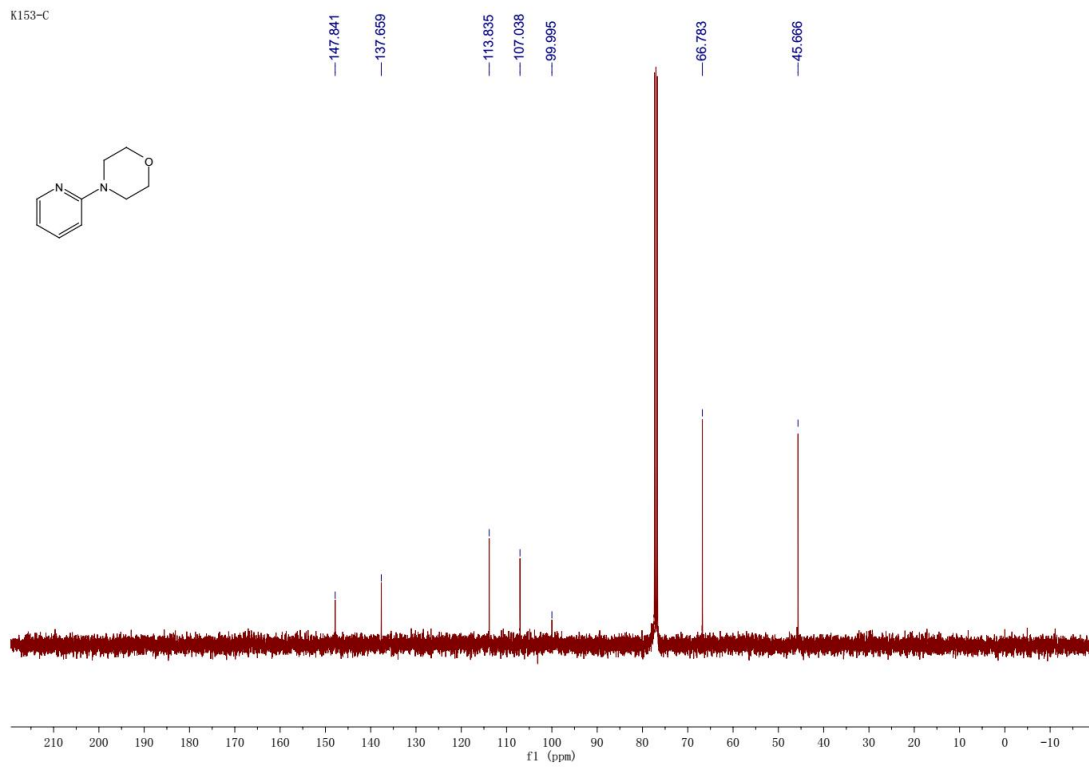

# NMR of 2ap

08-5-H

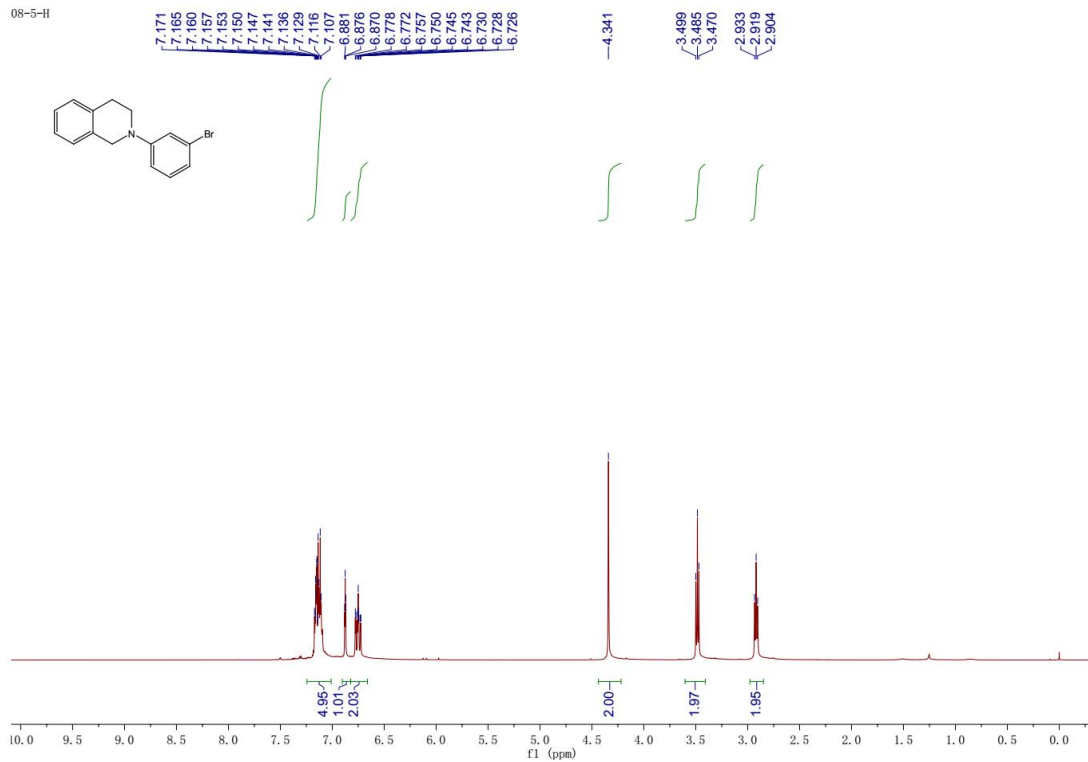

08-5-C

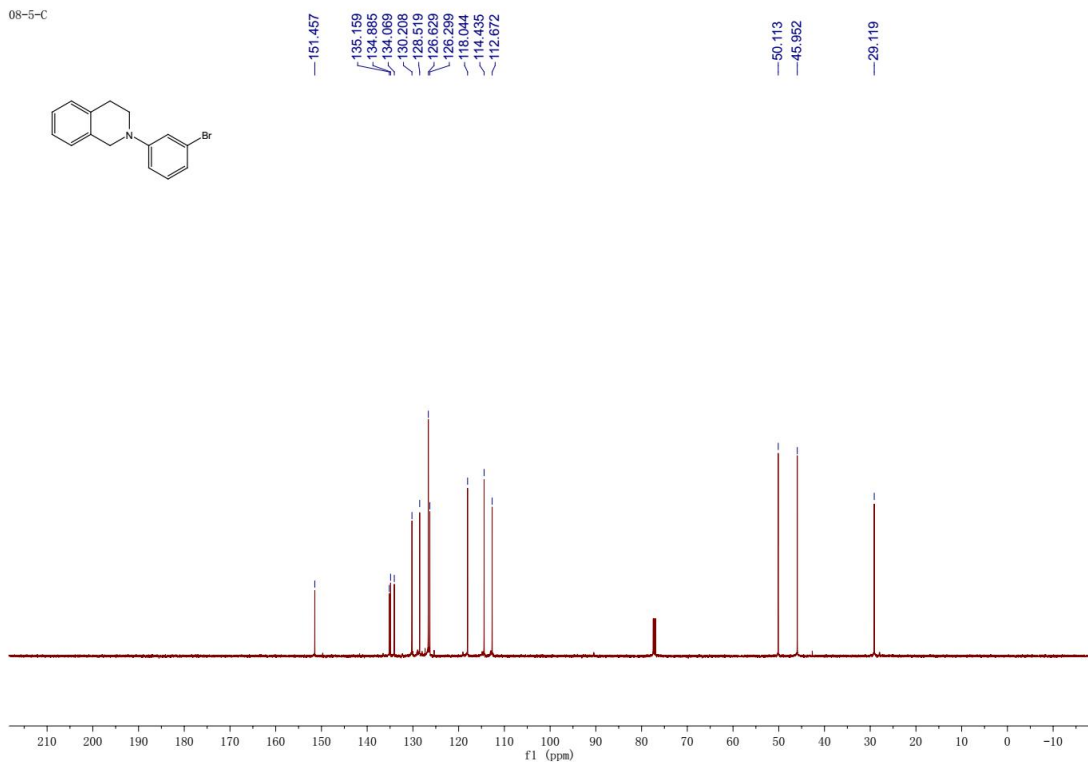

# NMR of 2aq

08-51-H

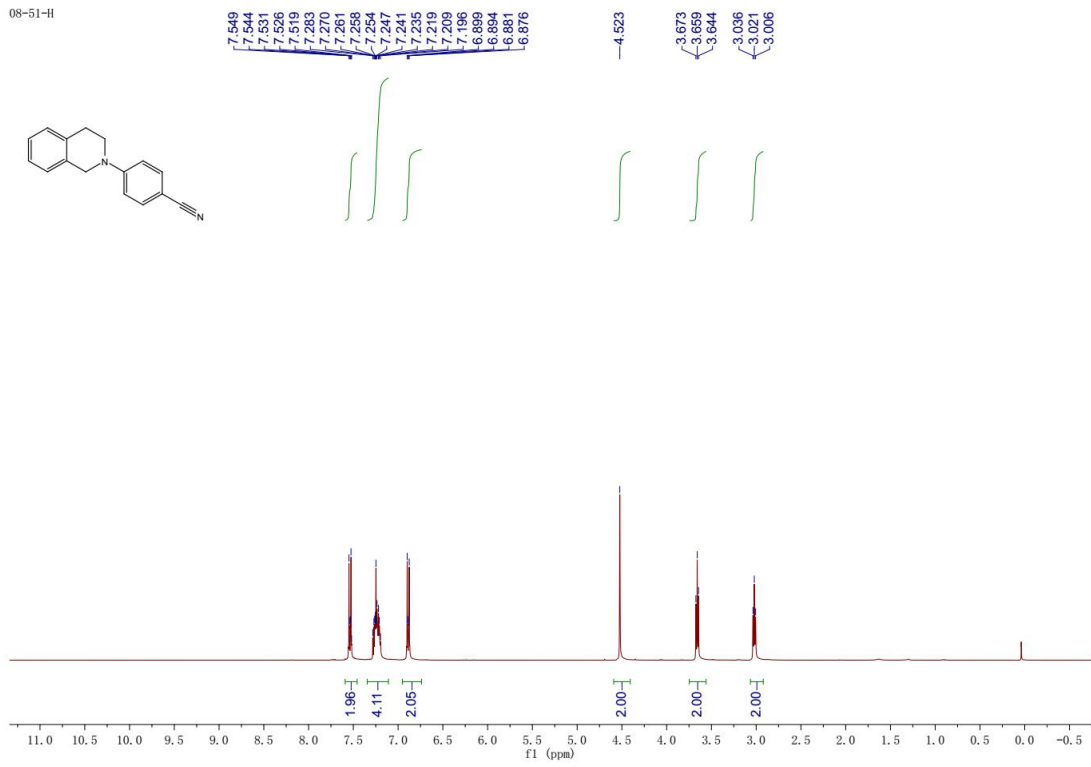

08-51-c

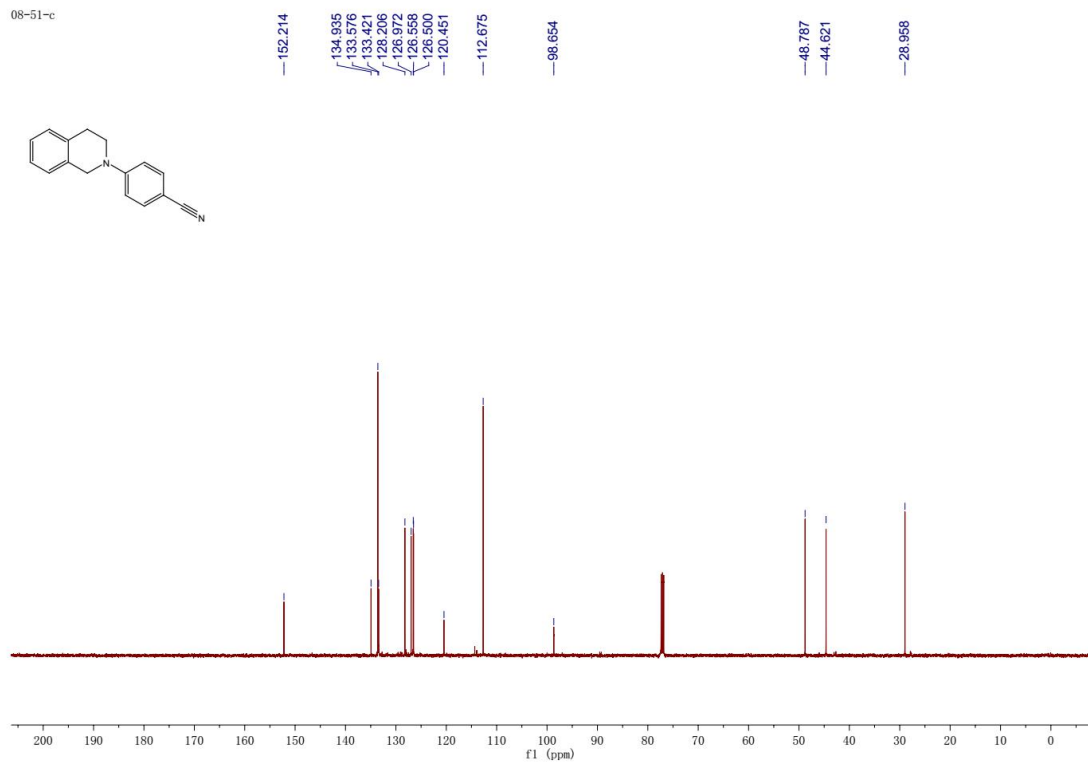

# NMR of 2ar

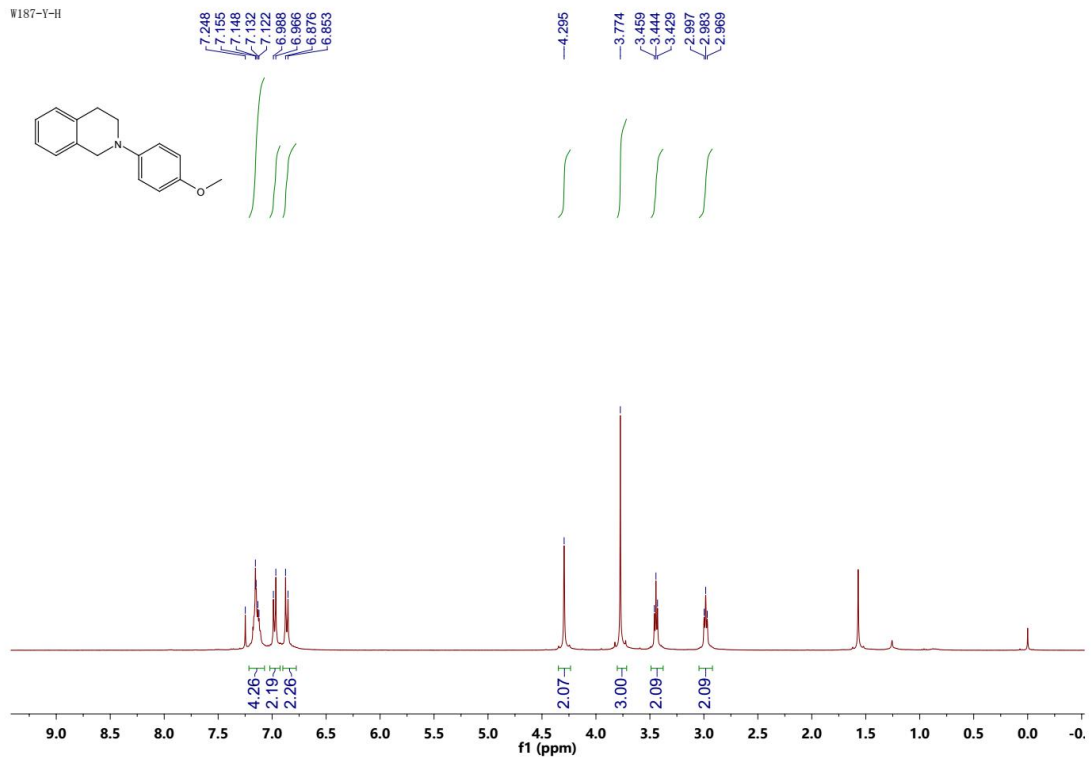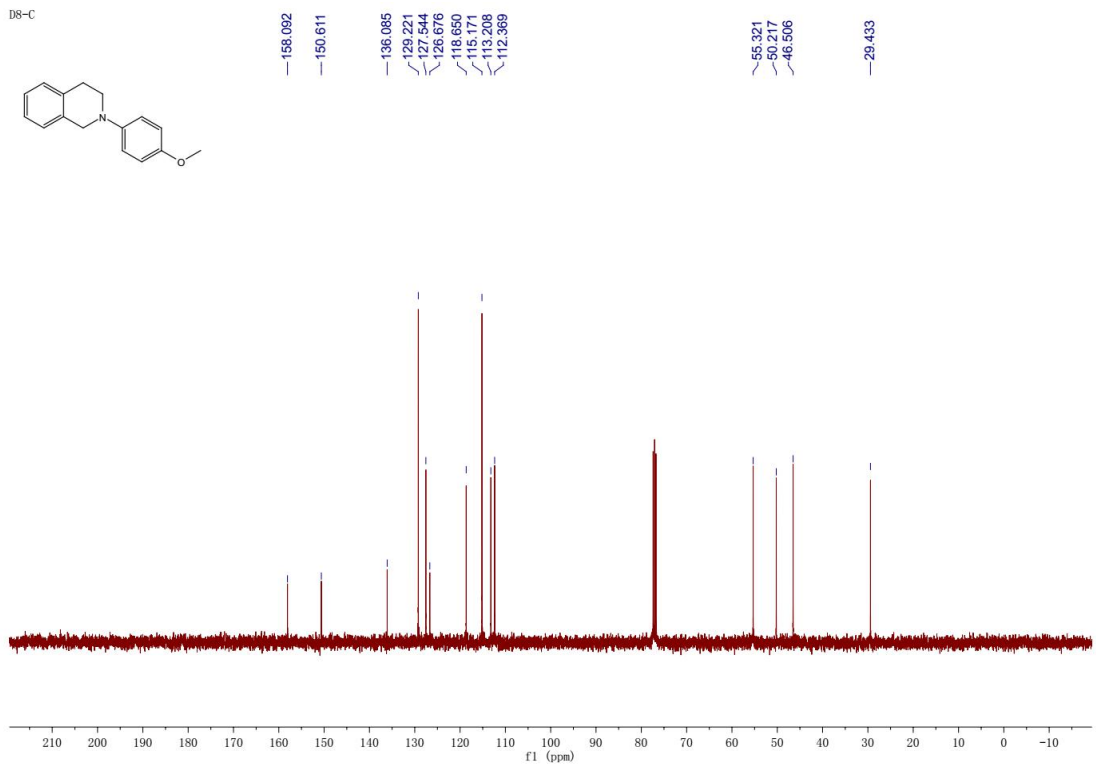



# NMR of 3p

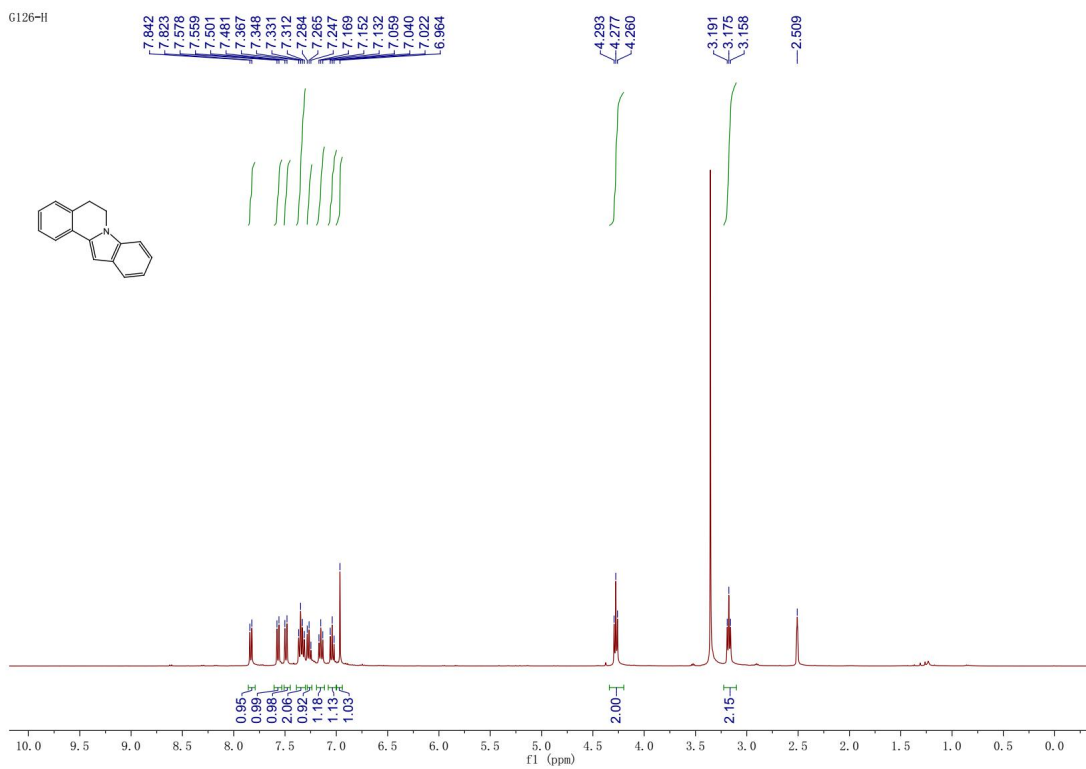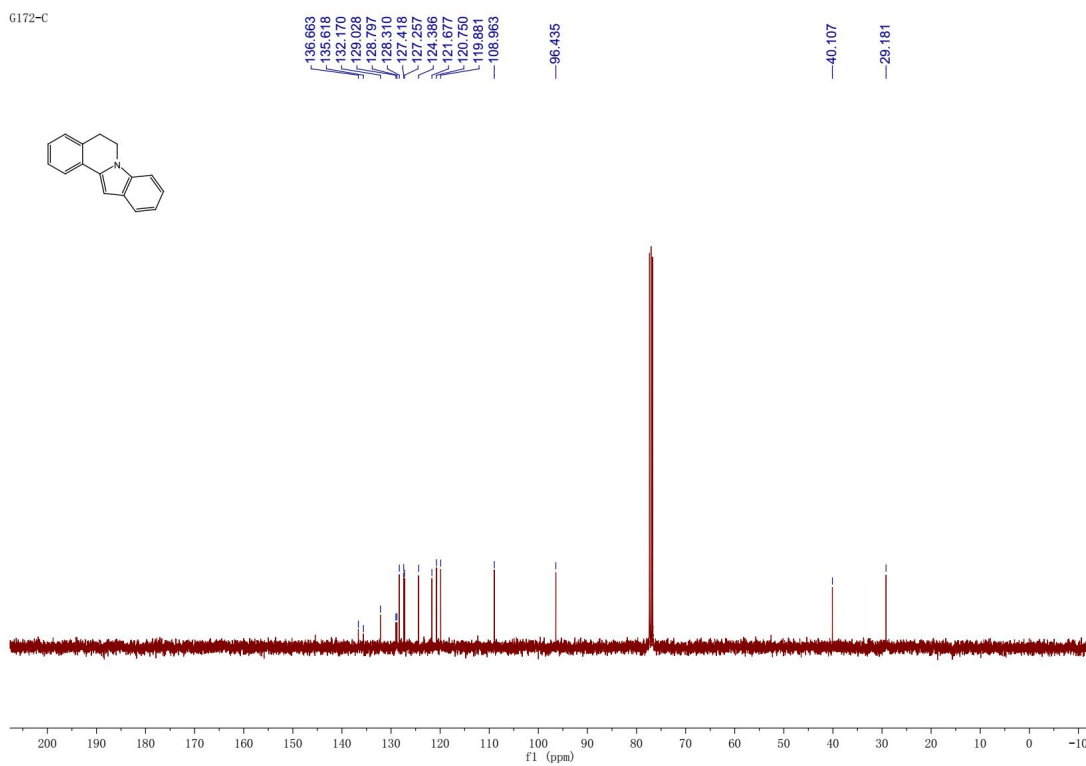

# NMR of 3q

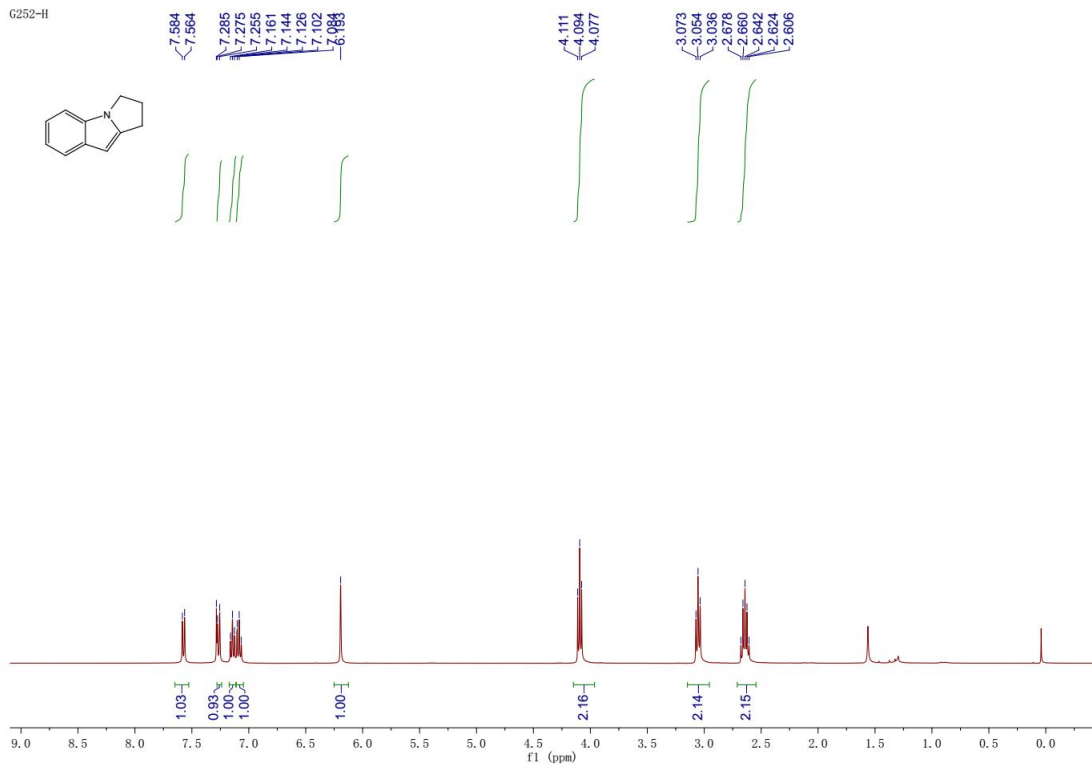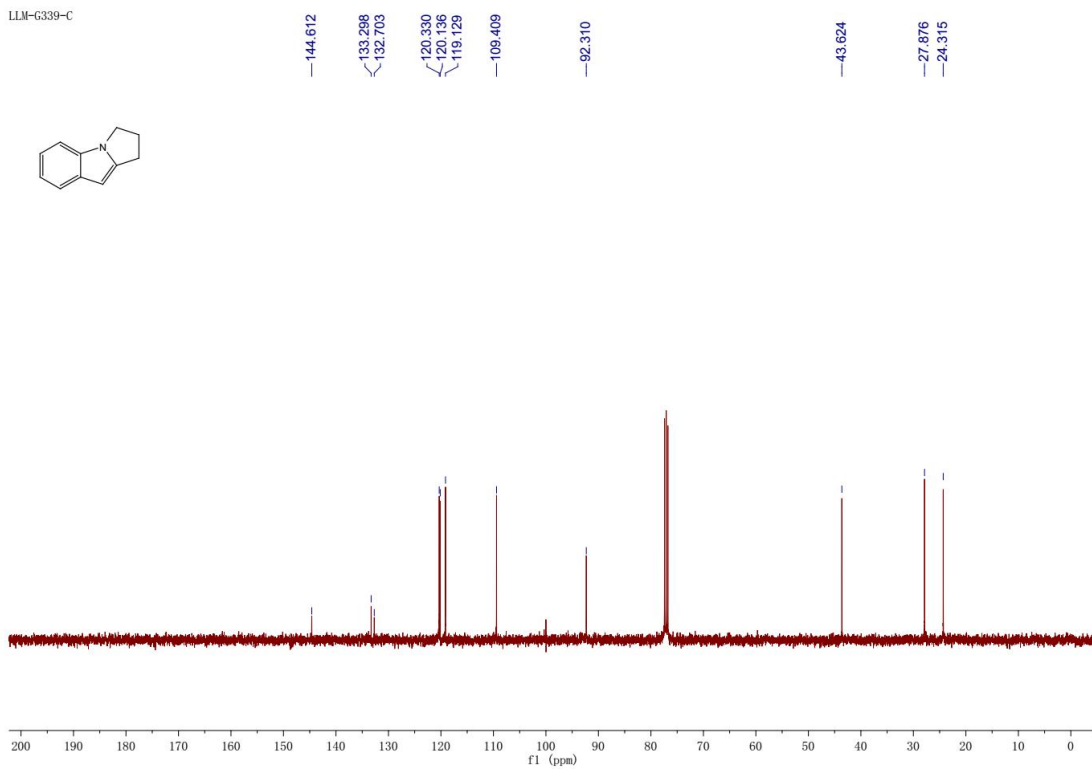

# NMR of 3ap

G230-1217-H

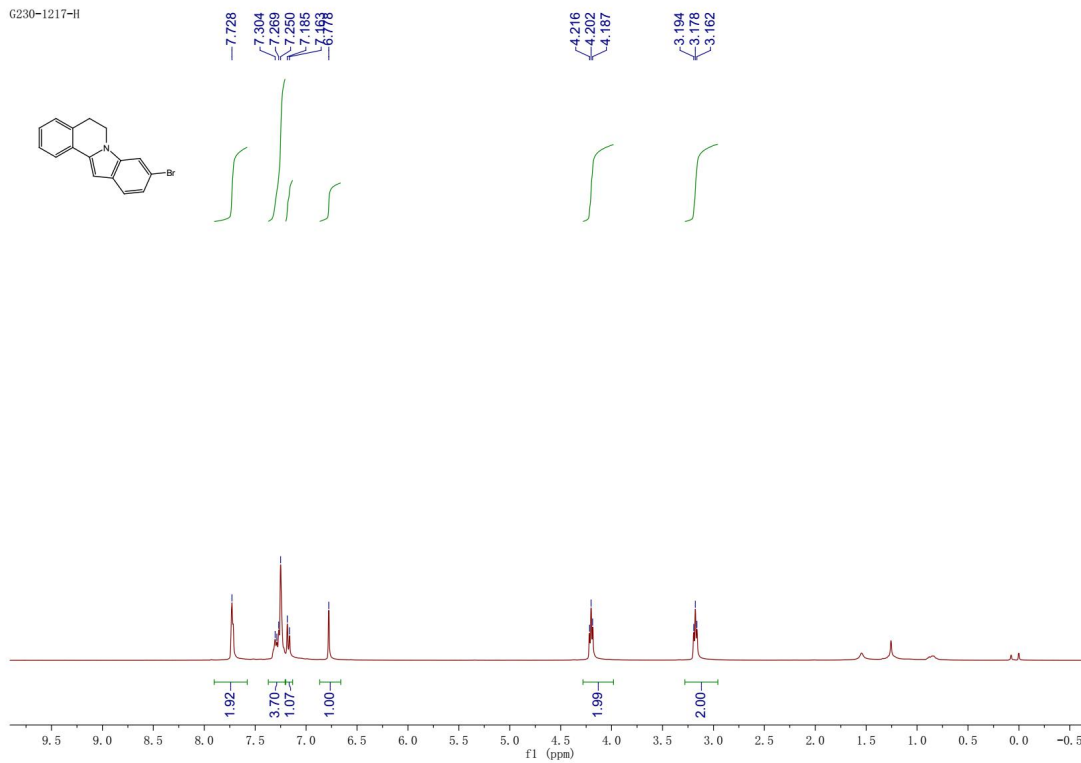

LLM-G212-C

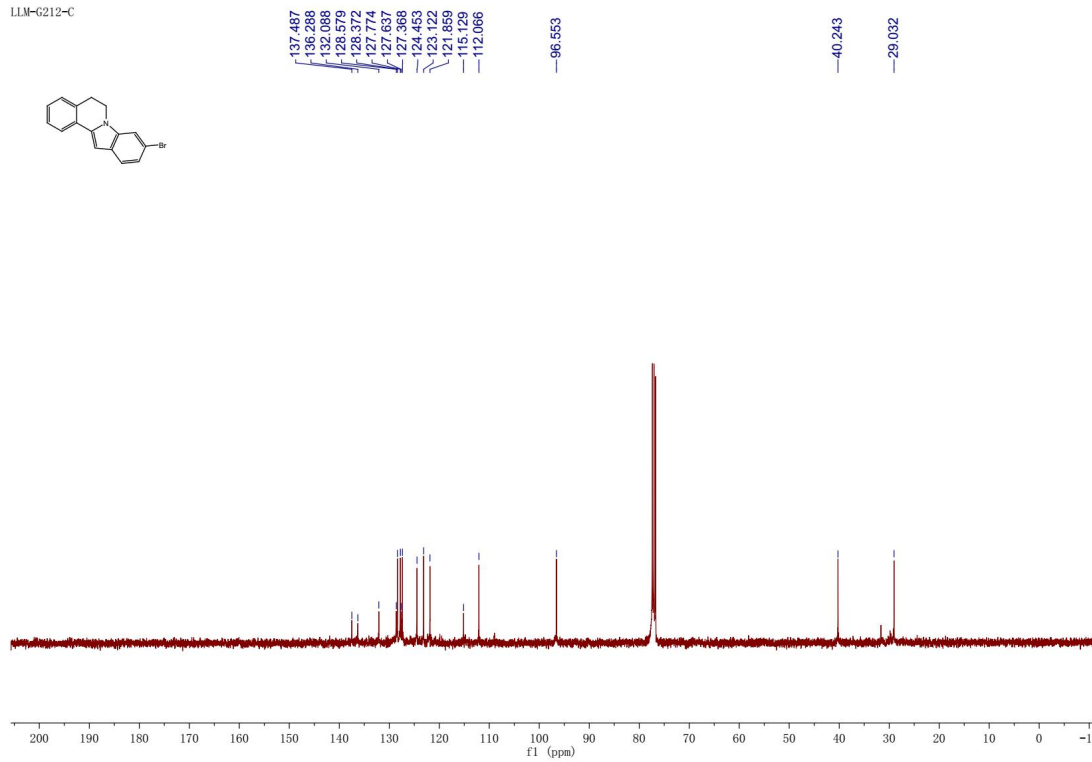

# NMR of 3aq

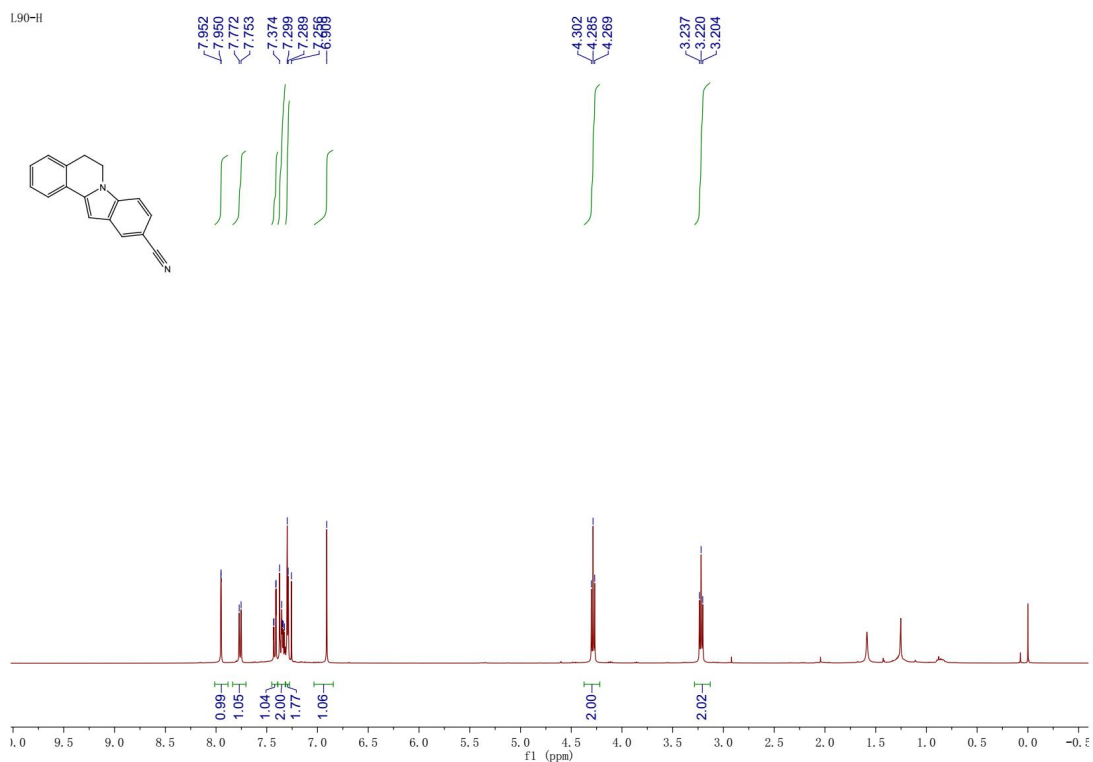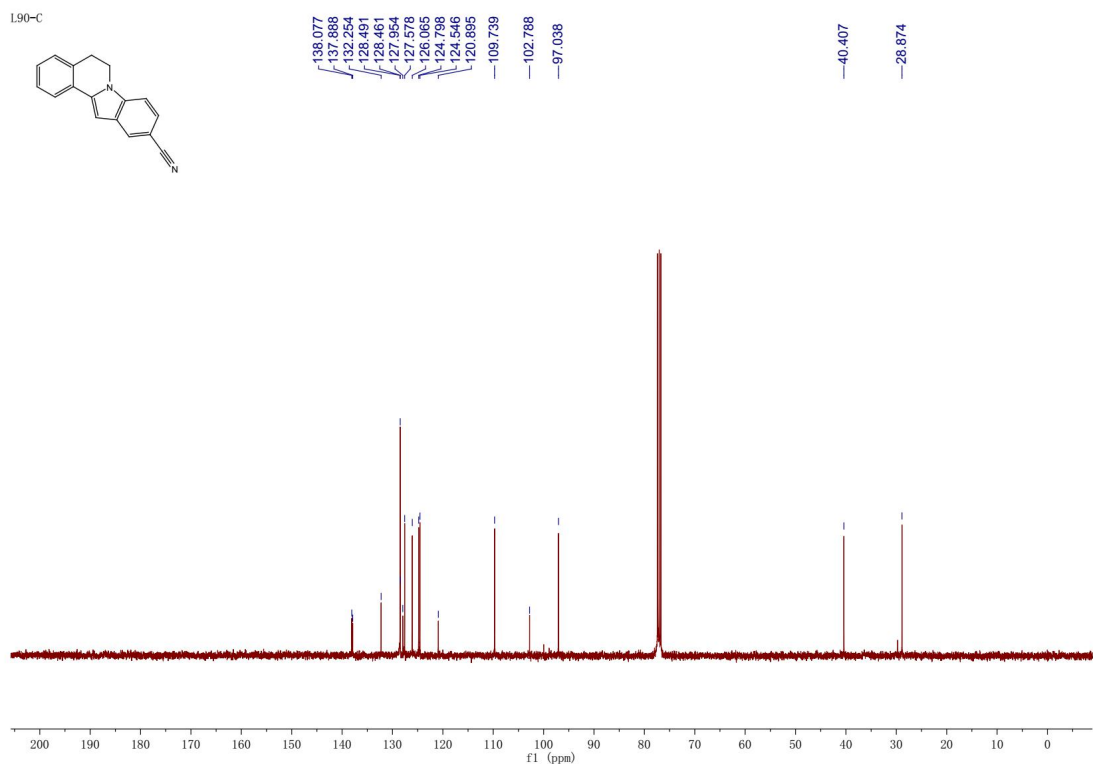

# NMR of 3ar

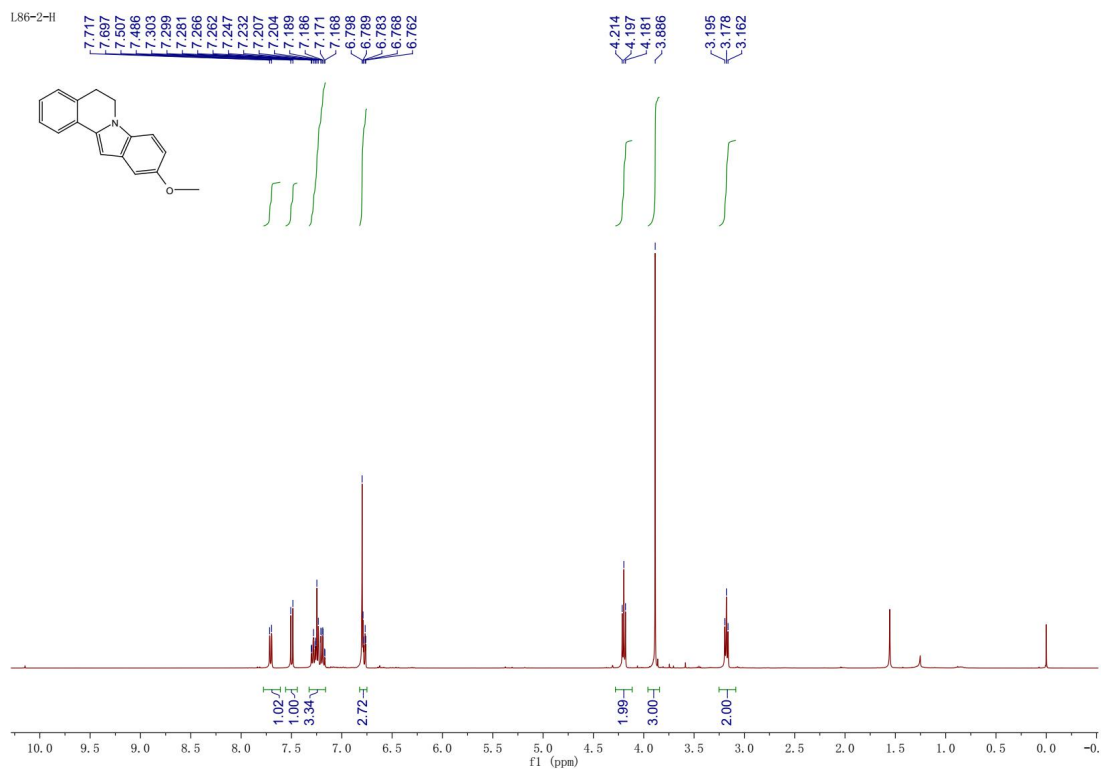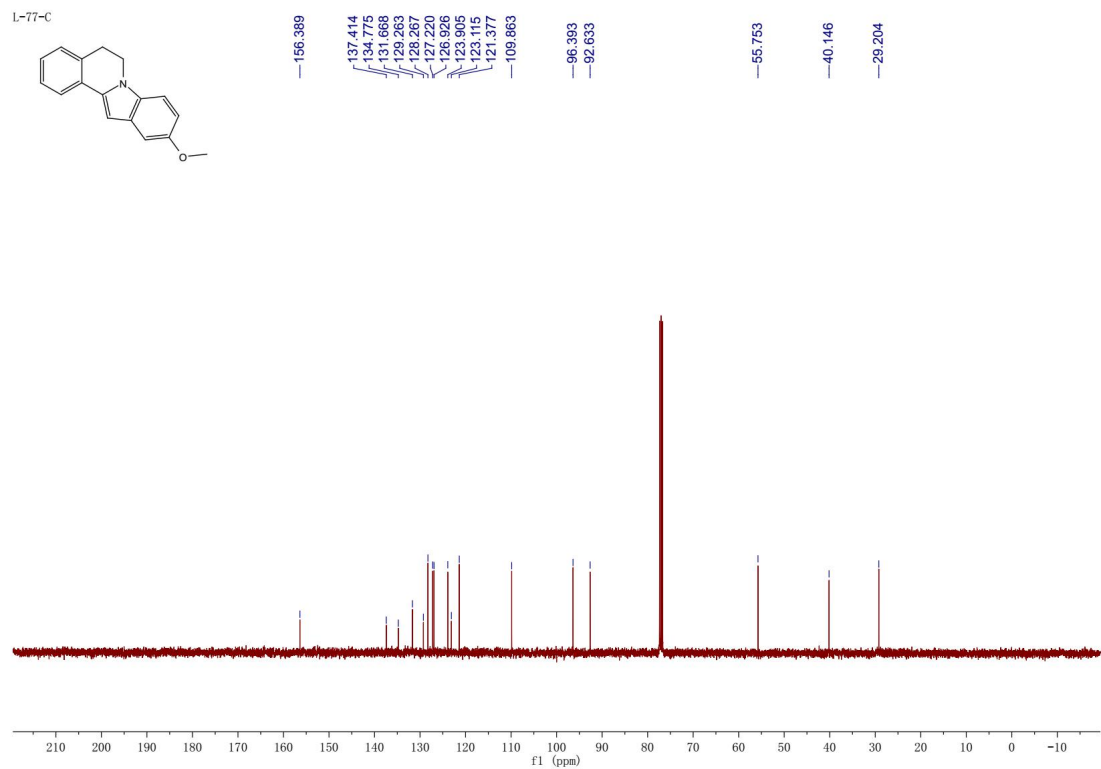

## 7. Molecular Coordinates and Free Energies

### 1a (O-State)

$\Delta G = -632.028681$  hartree

|   |           |           |           |
|---|-----------|-----------|-----------|
| C | 0.592002  | -0.287720 | -0.206205 |
| C | 0.923949  | -1.665772 | -0.239013 |
| C | 2.197190  | -2.117960 | 0.084514  |
| C | 3.212344  | -1.223850 | 0.460292  |
| C | 2.928772  | 0.132296  | 0.443066  |
| C | 1.657718  | 0.633951  | 0.076538  |
| C | 1.629925  | 2.076462  | -0.179342 |
| O | 0.736861  | 2.734104  | -0.712897 |
| O | -3.383554 | -0.245320 | 0.471326  |
| C | -2.736196 | -1.275249 | -0.282155 |
| C | -1.668609 | -0.671857 | -1.196410 |
| N | -0.701077 | 0.136005  | -0.448478 |
| C | -1.362872 | 1.150023  | 0.379951  |
| C | -2.439459 | 0.493369  | 1.251701  |
| H | 0.157137  | -2.397175 | -0.463623 |
| H | 2.392026  | -3.186749 | 0.074164  |
| H | 4.197331  | -1.583947 | 0.737475  |
| H | 3.712130  | 0.850233  | 0.674301  |
| H | 2.572121  | 2.584323  | 0.109264  |
| H | -3.514179 | -1.767260 | -0.871685 |
| H | -2.291653 | -2.011009 | 0.405175  |
| H | -2.165364 | -0.006089 | -1.915740 |
| H | -1.158294 | -1.446075 | -1.770596 |
| H | -1.812173 | 1.914777  | -0.263993 |
| H | -0.638488 | 1.641574  | 1.026440  |
| H | -3.009629 | 1.259069  | 1.784839  |
| H | -1.968460 | -0.176131 | 1.988271  |

### 1a (H-State)

$\Delta G = -632.033918$  hartree

|   |           |           |           |
|---|-----------|-----------|-----------|
| C | -0.448154 | -0.367930 | 0.242997  |
| C | -0.582927 | -1.771054 | 0.130933  |
| C | -1.797459 | -2.348731 | -0.224464 |
| C | -2.927513 | -1.558505 | -0.491652 |
| C | -2.828103 | -0.182777 | -0.343971 |
| C | -1.620978 | 0.425123  | 0.057802  |
| C | -1.647206 | 1.840753  | 0.446837  |
| O | -2.559892 | 2.626348  | 0.189796  |
| O | 3.461478  | 0.143216  | -0.469407 |
| C | 2.940328  | -0.965999 | 0.271577  |
| C | 1.842080  | -0.499855 | 1.228478  |
| N | 0.775275  | 0.234541  | 0.538250  |
| C | 1.319939  | 1.319171  | -0.297799 |
| C | 2.429594  | 0.795668  | -1.214480 |
| H | 0.278310  | -2.412177 | 0.276046  |
| H | -1.857385 | -3.429225 | -0.320579 |
| H | -3.865118 | -2.018511 | -0.786081 |
| H | -3.694664 | 0.455683  | -0.485506 |

|   |           |           |           |
|---|-----------|-----------|-----------|
| H | -0.794278 | 2.180229  | 1.060542  |
| H | 3.780122  | -1.390448 | 0.827905  |
| H | 2.557980  | -1.725563 | -0.426970 |
| H | 2.289798  | 0.184575  | 1.962023  |
| H | 1.421690  | -1.340973 | 1.782627  |
| H | 1.721784  | 2.107527  | 0.351755  |
| H | 0.529884  | 1.753870  | -0.911921 |
| H | 2.904687  | 1.625630  | -1.744495 |
| H | 2.009973  | 0.095903  | -1.953754 |

### 1a (A, O-State)

$\Delta G = -631.948489$  hartree

|   |           |           |           |
|---|-----------|-----------|-----------|
| C | 0.665625  | -0.182638 | -0.000144 |
| C | 0.872413  | -1.558885 | -0.000159 |
| C | 2.177284  | -2.078051 | 0.000012  |
| C | 3.275420  | -1.193429 | 0.000227  |
| C | 3.085233  | 0.179562  | 0.000239  |
| C | 1.770591  | 0.732223  | 0.000011  |
| C | 1.468756  | 2.112384  | -0.000154 |
| O | 0.238115  | 2.541821  | -0.000409 |
| O | -3.315617 | -0.539004 | 0.000359  |
| C | -2.524016 | -0.661192 | -1.180904 |
| C | -1.446673 | 0.435285  | -1.225914 |
| N | -0.642687 | 0.406217  | -0.000257 |
| C | -1.446432 | 0.436112  | 1.225548  |
| C | -2.523677 | -0.660485 | 1.181468  |
| H | 0.024545  | -2.236077 | -0.000270 |
| H | 2.331507  | -3.151948 | -0.000014 |
| H | 4.286070  | -1.592688 | 0.000361  |
| H | 3.939295  | 0.851530  | 0.000382  |
| H | 2.270596  | 2.858076  | 0.000064  |
| H | -3.201216 | -0.546527 | -2.030168 |
| H | -2.066869 | -1.659634 | -1.226827 |
| H | -1.931454 | 1.415192  | -1.284190 |
| H | -0.791453 | 0.308741  | -2.089000 |
| H | -1.931271 | 1.416024  | 1.283238  |
| H | -0.791026 | 0.310214  | 2.088588  |
| H | -3.200648 | -0.545425 | 2.030862  |
| H | -2.066400 | -1.658848 | 1.227795  |

### 1a (A, H-State)

$\Delta G = -631.950872$  hartree

|   |          |           |           |
|---|----------|-----------|-----------|
| C | 0.441900 | -0.399504 | 0.225765  |
| C | 0.571081 | -1.802191 | 0.146706  |
| C | 1.776885 | -2.401577 | -0.204488 |
| C | 2.891340 | -1.567066 | -0.494226 |
| C | 2.815265 | -0.188956 | -0.382634 |
| C | 1.624788 | 0.468072  | 0.050372  |
| C | 1.666866 | 1.851278  | 0.420865  |
| O | 2.693997 | 2.590866  | 0.256749  |

|   |           |           |           |
|---|-----------|-----------|-----------|
| O | -3.470990 | 0.215556  | -0.452535 |
| C | -2.432496 | 0.839916  | -1.197868 |
| C | -1.300612 | 1.323854  | -0.269514 |
| N | -0.792579 | 0.173951  | 0.491074  |
| C | -1.856789 | -0.521428 | 1.214335  |
| C | -2.995914 | -0.922671 | 0.257288  |
| H | -0.304733 | -2.426195 | 0.282953  |
| H | 1.848501  | -3.478628 | -0.300039 |
| H | 3.832803  | -2.022479 | -0.790636 |
| H | 3.694012  | 0.424514  | -0.545650 |
| H | 0.771966  | 2.285653  | 0.887849  |
| H | -2.874078 | 1.700953  | -1.703892 |
| H | -2.028821 | 0.146069  | -1.948499 |
| H | -1.695957 | 2.068380  | 0.428973  |
| H | -0.500027 | 1.761502  | -0.863672 |
| H | -2.253523 | 0.184333  | 1.953590  |
| H | -1.454672 | -1.383672 | 1.743845  |
| H | -3.836189 | -1.316746 | 0.831948  |
| H | -2.649157 | -1.691072 | -0.447604 |

### 1a (TS1)

$\Delta G = -631.936192$  hartree

|   |           |           |           |
|---|-----------|-----------|-----------|
| C | 0.772386  | -0.397711 | 0.105250  |
| C | 1.366501  | -1.657322 | 0.256062  |
| C | 2.751463  | -1.820420 | 0.274721  |
| C | 3.556846  | -0.672491 | 0.103636  |
| C | 2.984685  | 0.573255  | -0.076224 |
| C | 1.568175  | 0.806441  | -0.068752 |
| C | 1.167290  | 2.152734  | -0.349374 |
| O | -0.008825 | 2.692655  | -0.416448 |
| O | -3.449079 | -0.080709 | -0.170013 |
| C | -2.837411 | -1.296419 | -0.593234 |
| C | -1.377587 | -1.058249 | -0.969600 |
| N | -0.652009 | -0.364279 | 0.099699  |
| C | -1.330231 | 0.662980  | 0.819570  |
| C | -2.826542 | 0.400622  | 1.014788  |
| H | 0.720897  | -2.521444 | 0.386175  |
| H | 3.190461  | -2.801790 | 0.414591  |
| H | 4.639577  | -0.764103 | 0.104467  |
| H | 3.629735  | 1.432789  | -0.242468 |
| H | 2.009912  | 2.824188  | -0.569568 |
| H | -3.387204 | -1.649229 | -1.467621 |
| H | -2.912504 | -2.051554 | 0.202299  |
| H | -1.323439 | -0.426382 | -1.869228 |
| H | -0.866440 | -1.996769 | -1.193473 |
| H | -1.117335 | 1.621027  | 0.231331  |
| H | -0.831259 | 0.819638  | 1.781046  |
| H | -3.325390 | 1.332654  | 1.286235  |
| H | -2.973172 | -0.325157 | 1.828952  |

### 1a (B)

$\Delta G = -631.950767$  hartree

|   |          |           |          |
|---|----------|-----------|----------|
| C | 0.805657 | -0.416420 | 0.137034 |
| C | 1.494623 | -1.615829 | 0.305068 |

|   |           |           |           |
|---|-----------|-----------|-----------|
| C | 2.891384  | -1.678538 | 0.240562  |
| C | 3.613190  | -0.497216 | -0.007035 |
| C | 2.950202  | 0.706562  | -0.169303 |
| C | 1.521561  | 0.811782  | -0.094366 |
| C | 0.980135  | 2.106808  | -0.271093 |
| O | -0.304352 | 2.507724  | -0.137329 |
| O | -3.410174 | -0.049297 | -0.154002 |
| C | -2.760355 | -1.025308 | -0.970386 |
| C | -1.288436 | -0.677792 | -1.168656 |
| N | -0.631338 | -0.482969 | 0.137041  |
| C | -1.347972 | 0.198733  | 1.115985  |
| C | -2.833487 | -0.034042 | 1.155752  |
| H | 0.912991  | -2.516567 | 0.480078  |
| H | 3.403499  | -2.625492 | 0.376214  |
| H | 4.697361  | -0.523812 | -0.069321 |
| H | 3.520498  | 1.612724  | -0.355967 |
| H | 1.637874  | 2.920198  | -0.558876 |
| H | -3.276979 | -1.031185 | -1.932710 |
| H | -2.859777 | -2.018944 | -0.507609 |
| H | -1.200035 | 0.234586  | -1.777005 |
| H | -0.779246 | -1.489579 | -1.695046 |
| H | -0.848870 | 1.812354  | 0.332208  |
| H | -0.832774 | 0.301651  | 2.069014  |
| H | -3.331173 | 0.760893  | 1.716479  |
| H | -3.066801 | -0.995892 | 1.652527  |

### 1a (C)

$\Delta G = -632.022491$  hartree

|   |           |           |           |
|---|-----------|-----------|-----------|
| C | 0.891580  | -0.611618 | 0.297342  |
| C | 1.886741  | -1.585438 | 0.174655  |
| C | 3.200412  | -1.163848 | -0.063002 |
| C | 3.517333  | 0.197774  | -0.175941 |
| C | 2.510372  | 1.165950  | -0.067598 |
| C | 1.200218  | 0.752318  | 0.164092  |
| C | -0.076369 | 1.557119  | 0.239588  |
| O | -0.441505 | 1.942968  | -1.098341 |
| O | -3.039452 | 0.032916  | -0.419936 |
| C | -2.693890 | -1.353865 | -0.438826 |
| C | -1.188217 | -1.517818 | -0.565095 |
| N | -0.490422 | -0.831002 | 0.547429  |
| C | -1.010585 | 0.518785  | 0.919488  |
| C | -2.528497 | 0.648919  | 0.759117  |
| H | 1.652021  | -2.641089 | 0.272273  |
| H | 3.988774  | -1.906227 | -0.150470 |
| H | 4.545582  | 0.500629  | -0.349132 |
| H | 2.747115  | 2.221504  | -0.171791 |
| H | 0.013067  | 2.453867  | 0.864538  |
| H | -3.194016 | -1.793738 | -1.304597 |
| H | -3.069816 | -1.841180 | 0.474120  |
| H | -0.872493 | -1.111845 | -1.538213 |
| H | -0.929005 | -2.581434 | -0.541166 |
| H | -1.211722 | 2.527650  | -1.053884 |
| H | -0.806482 | 0.632280  | 1.993520  |
| H | -2.819243 | 1.702629  | 0.720981  |
| H | -3.017762 | 0.197236  | 1.635119  |

**1a (TS2)** **$\Delta G = -631.934552$  hartree**

|   |           |           |           |
|---|-----------|-----------|-----------|
| C | -0.504923 | -0.300449 | -0.000422 |
| C | -0.500410 | -1.679252 | -0.000265 |
| C | -1.735640 | -2.368577 | -0.000036 |
| C | -2.943505 | -1.644410 | 0.000166  |
| C | -2.963656 | -0.255025 | 0.000134  |
| C | -1.725578 | 0.459948  | -0.000158 |
| C | -1.496986 | 1.851785  | -0.000118 |
| O | -2.163938 | 2.899101  | 0.000074  |
| O | 3.409578  | -0.218132 | 0.000400  |
| C | 2.622604  | -0.388362 | 1.180403  |
| C | 1.491184  | 0.636974  | 1.235097  |
| N | 0.651709  | 0.596916  | -0.000296 |
| C | 1.491775  | 0.636859  | -1.235237 |
| C | 2.623157  | -0.388490 | -1.179954 |
| H | 0.425211  | -2.243082 | -0.000369 |
| H | -1.744445 | -3.453147 | 0.000008  |
| H | -3.886208 | -2.185945 | 0.000369  |
| H | -3.902369 | 0.289303  | 0.000329  |
| H | -0.129586 | 1.675759  | -0.000374 |
| H | 3.290861  | -0.235707 | 2.030703  |
| H | 2.231633  | -1.413940 | 1.228113  |
| H | 1.914170  | 1.644522  | 1.300096  |
| H | 0.842788  | 0.467895  | 2.096651  |
| H | 1.914871  | 1.644371  | -1.300043 |
| H | 0.843825  | 0.467775  | -2.097125 |
| H | 3.291811  | -0.235908 | -2.029956 |
| H | 2.232218  | -1.414075 | -1.227767 |

**1a (D)** **$\Delta G = -631.938166$  hartree**

|   |           |           |           |
|---|-----------|-----------|-----------|
| C | 0.472123  | 0.245111  | -0.017759 |
| C | 0.341104  | 1.619780  | -0.012889 |
| C | 1.494987  | 2.429927  | 0.007247  |
| C | 2.768034  | 1.819497  | 0.023958  |
| C | 2.907621  | 0.442870  | 0.018587  |
| C | 1.751064  | -0.415577 | -0.004696 |
| C | 1.812422  | -1.825408 | -0.016597 |
| O | 2.750619  | -2.638482 | -0.013701 |
| O | -3.448695 | 0.091069  | 0.036971  |
| C | -2.642446 | 0.249977  | 1.204149  |
| C | -1.508681 | -0.765657 | 1.229501  |
| N | -0.667325 | -0.704745 | -0.035166 |
| C | -1.549098 | -0.687642 | -1.272505 |
| C | -2.688985 | 0.316025  | -1.149923 |
| H | -0.632422 | 2.093753  | -0.025267 |
| H | 1.395011  | 3.509604  | 0.010237  |
| H | 3.658181  | 2.443849  | 0.040942  |
| H | 3.891506  | -0.015435 | 0.030889  |
| H | -0.141940 | -1.613447 | -0.067563 |
| H | -3.289764 | 0.071972  | 2.065150  |
| H | -2.264218 | 1.278181  | 1.268243  |

|   |           |           |           |
|---|-----------|-----------|-----------|
| H | -1.916231 | -1.778718 | 1.276008  |
| H | -0.838761 | -0.606625 | 2.075134  |
| H | -1.954407 | -1.697752 | -1.369646 |
| H | -0.908537 | -0.471695 | -2.128179 |
| H | -3.367416 | 0.174921  | -1.993733 |
| H | -2.323988 | 1.350496  | -1.176658 |

**1a (TS3)** **$\Delta G = -631.926948$  hartree**

|   |           |           |           |
|---|-----------|-----------|-----------|
| C | 0.715359  | -0.736383 | 0.012822  |
| C | 1.679839  | -1.757025 | 0.001664  |
| C | 3.033564  | -1.423231 | -0.011660 |
| C | 3.396898  | -0.072797 | -0.008007 |
| C | 2.400854  | 0.905934  | 0.001514  |
| C | 1.028050  | 0.622001  | 0.011596  |
| C | 0.007103  | 2.274713  | -0.112779 |
| O | 0.796006  | 3.173581  | 0.006174  |
| O | -3.147855 | 0.260603  | -0.020145 |
| C | -2.319035 | 0.321001  | 1.146237  |
| C | -1.519110 | -0.961313 | 1.299985  |
| N | -0.699798 | -1.283520 | 0.051355  |
| C | -1.536790 | -1.101796 | -1.214670 |
| C | -2.327935 | 0.194233  | -1.194145 |
| H | 1.391284  | -2.807370 | 0.006402  |
| H | 3.784660  | -2.206967 | -0.021560 |
| H | 4.447637  | 0.208196  | -0.013509 |
| H | 2.684920  | 1.960434  | 0.002254  |
| H | -0.551718 | -2.292263 | 0.106617  |
| H | -2.981709 | 0.420737  | 2.008949  |
| H | -1.664185 | 1.196893  | 1.082117  |
| H | -2.192629 | -1.810922 | 1.435588  |
| H | -0.823569 | -0.911716 | 2.138582  |
| H | -2.215616 | -1.957749 | -1.243030 |
| H | -0.852646 | -1.152000 | -2.062548 |
| H | -2.998654 | 0.204334  | -2.056342 |
| H | -1.667186 | 1.067535  | -1.226574 |

**1a (E)** **$\Delta G = -518.615200$  hartree**

|   |           |           |           |
|---|-----------|-----------|-----------|
| C | -0.804080 | -0.287751 | 0.000006  |
| C | -1.857257 | -1.214927 | 0.000085  |
| C | -3.165060 | -0.725545 | 0.000013  |
| C | -3.363561 | 0.660749  | -0.000135 |
| C | -2.259250 | 1.526162  | -0.000206 |
| C | -0.902924 | 1.102521  | -0.000140 |
| O | 3.038962  | 0.572755  | 0.000015  |
| C | 2.221450  | 0.564687  | -1.173413 |
| C | 1.403073  | -0.716827 | -1.253687 |
| N | 0.571691  | -0.950078 | 0.000102  |
| C | 1.403014  | -0.716583 | 1.253887  |
| C | 2.221385  | 0.564920  | 1.173401  |
| H | -1.684497 | -2.291297 | 0.000199  |
| H | -4.005500 | -1.413651 | 0.000070  |
| H | -4.376941 | 1.059620  | -0.000193 |



|   |           |           |           |
|---|-----------|-----------|-----------|
| H | -2.477941 | 2.596995  | -0.000321 |
| H | 0.372437  | -1.952175 | 0.000195  |
| H | 2.896523  | 0.601012  | -2.031841 |
| H | 1.563588  | 1.438896  | -1.181089 |
| H | 2.067053  | -1.580212 | -1.346919 |
| H | 0.712096  | -0.698059 | -2.097474 |
| H | 2.066994  | -1.579946 | 1.347315  |
| H | 0.711996  | -0.697657 | 2.097637  |
| H | 2.896410  | 0.601425  | 2.031859  |
| H | 1.563515  | 1.439125  | 1.180862  |

### 1a (TS4)

$\Delta G = -518.611556$  hartree

|   |           |           |           |
|---|-----------|-----------|-----------|
| C | 0.774955  | -0.196251 | 0.000000  |
| C | 1.108967  | 1.155441  | -0.000008 |
| C | 2.480451  | 1.453184  | -0.000009 |
| C | 3.432211  | 0.424103  | -0.000003 |
| C | 3.039358  | -0.926073 | 0.000004  |
| C | 1.675978  | -1.270368 | 0.000006  |
| O | -3.066149 | 0.528658  | -0.000003 |
| C | -2.261014 | 0.511241  | 1.182230  |
| C | -1.386001 | -0.738170 | 1.227714  |
| N | -0.546664 | -0.869469 | 0.000006  |
| C | -1.386004 | -0.738192 | -1.227701 |
| C | -2.261017 | 0.511220  | -1.182238 |
| H | 0.375730  | 1.955421  | -0.000011 |
| H | 2.802954  | 2.490510  | -0.000013 |
| H | 4.489226  | 0.681849  | -0.000003 |
| H | 3.811901  | -1.694096 | 0.000009  |
| H | 0.251370  | -1.852843 | 0.000013  |
| H | -2.949937 | 0.514193  | 2.030114  |
| H | -1.649123 | 1.423229  | 1.231190  |
| H | -2.018868 | -1.630084 | 1.275847  |
| H | -0.723383 | -0.727591 | 2.096253  |
| H | -2.018871 | -1.630107 | -1.275817 |
| H | -0.723388 | -0.727628 | -2.096242 |
| H | -2.949943 | 0.514156  | -2.030119 |
| H | -1.649126 | 1.423207  | -1.231216 |

### 2a

$\Delta G = -518.710664$  hartree

|   |           |           |           |
|---|-----------|-----------|-----------|
| C | -0.723623 | 0.064704  | 0.345146  |
| C | -1.307692 | -1.183501 | 0.027623  |
| C | -2.653824 | -1.279516 | -0.335976 |
| C | -3.464846 | -0.145343 | -0.414592 |
| C | -2.896992 | 1.097554  | -0.109723 |
| C | -1.559574 | 1.205812  | 0.266640  |
| O | 3.081049  | -0.100474 | -0.639060 |
| C | 2.299191  | -1.255973 | -0.307405 |
| C | 1.463937  | -0.990212 | 0.947207  |
| N | 0.603591  | 0.184406  | 0.782692  |
| C | 1.416528  | 1.352537  | 0.416104  |
| C | 2.258506  | 1.056881  | -0.829204 |
| H | -0.716927 | -2.090876 | 0.046272  |

|   |           |           |           |
|---|-----------|-----------|-----------|
| H | -3.061516 | -2.258705 | -0.573160 |
| H | -4.507742 | -0.224501 | -0.705057 |
| H | -3.503508 | 1.998427  | -0.152677 |
| H | -1.172036 | 2.184733  | 0.525008  |
| H | 3.008903  | -2.070840 | -0.140583 |
| H | 1.651304  | -1.516876 | -1.157865 |
| H | 2.147420  | -0.782111 | 1.780903  |
| H | 0.877813  | -1.866749 | 1.225796  |
| H | 2.081621  | 1.587772  | 1.256625  |
| H | 0.791188  | 2.226145  | 0.236045  |
| H | 2.938800  | 1.885891  | -1.043155 |
| H | 1.601484  | 0.902979  | -1.699436 |

### 3a

$\Delta G = -555.638916$  hartree

|   |           |           |           |
|---|-----------|-----------|-----------|
| C | 0.812283  | -0.389758 | 0.030536  |
| C | 1.697105  | -1.475757 | 0.005067  |
| C | 3.062778  | -1.193440 | -0.019498 |
| C | 3.534600  | 0.138000  | -0.023652 |
| C | 2.650689  | 1.214772  | -0.008860 |
| C | 1.265705  | 0.963011  | 0.012214  |
| C | 0.093098  | 1.794364  | 0.009430  |
| O | -3.234066 | 0.139930  | -0.418238 |
| C | -2.891881 | -1.077533 | 0.248057  |
| C | -1.468318 | -1.505049 | -0.103630 |
| N | -0.570395 | -0.366483 | 0.067934  |
| C | -0.995464 | 0.953192  | 0.033386  |
| C | -2.469925 | 1.235715  | 0.095404  |
| H | 1.340211  | -2.501146 | 0.006922  |
| H | 3.775502  | -2.012883 | -0.035491 |
| H | 4.605154  | 0.321798  | -0.041176 |
| H | 3.024095  | 2.235368  | -0.017648 |
| H | 0.058946  | 2.875486  | 0.002435  |
| H | -3.603159 | -1.834869 | -0.086790 |
| H | -2.999251 | -0.946733 | 1.335008  |
| H | -1.423716 | -1.857094 | -1.142082 |
| H | -1.153947 | -2.323949 | 0.550968  |
| H | -2.722175 | 2.111043  | -0.506775 |
| H | -2.780380 | 1.433815  | 1.134274  |

### 1b (O-State)

$\Delta G = -710.610865$  hartree

|   |           |           |           |
|---|-----------|-----------|-----------|
| C | 0.945698  | -0.276188 | -0.265058 |
| C | 1.159360  | -1.678403 | -0.302881 |
| C | 2.360786  | -2.243201 | 0.102812  |
| C | 3.418476  | -1.445688 | 0.572030  |
| C | 3.259096  | -0.070101 | 0.550983  |
| C | 2.070869  | 0.544319  | 0.086267  |
| O | -3.094781 | 0.416206  | -0.104917 |
| C | -2.585056 | -0.710490 | -0.846750 |
| C | -2.569800 | -2.011729 | -0.039236 |
| C | -1.238190 | -0.351784 | -1.490163 |
| N | -0.305691 | 0.239824  | -0.530326 |
| C | -0.857682 | 1.434268  | 0.099107  |

|   |           |           |           |
|---|-----------|-----------|-----------|
| C | -2.196791 | 1.106497  | 0.787506  |
| C | -2.018575 | 0.404451  | 2.138502  |
| C | 2.211269  | 1.972754  | -0.206528 |
| O | 1.477928  | 2.674482  | -0.903349 |
| H | 0.347241  | -2.335342 | -0.589852 |
| H | 2.462811  | -3.324762 | 0.087262  |
| H | 4.342508  | -1.895134 | 0.919685  |
| H | 4.083519  | 0.574245  | 0.847320  |
| H | -3.311555 | -0.829237 | -1.658484 |
| H | -2.424426 | -2.859735 | -0.718036 |
| H | -3.528379 | -2.147075 | 0.470357  |
| H | -1.774613 | -2.036491 | 0.708902  |
| H | -1.418005 | 0.394821  | -2.278233 |
| H | -0.795361 | -1.226012 | -1.967638 |
| H | -1.002059 | 2.220626  | -0.651578 |
| H | -0.166582 | 1.815616  | 0.849246  |
| H | -2.707949 | 2.059043  | 0.966703  |
| H | -1.601774 | 1.114165  | 2.861758  |
| H | -1.340636 | -0.450656 | 2.080787  |
| H | -2.984959 | 0.060007  | 2.518132  |
| H | 3.138118  | 2.413422  | 0.212533  |

### 1b (H-State)

$\Delta G = -710.613788$  hartree

|   |           |           |           |
|---|-----------|-----------|-----------|
| C | -0.847568 | 0.388477  | -0.275333 |
| C | -0.947762 | 1.795131  | -0.123383 |
| C | -2.127723 | 2.393216  | 0.295652  |
| C | -3.267466 | 1.623831  | 0.593062  |
| C | -3.209224 | 0.253887  | 0.401309  |
| C | -2.037832 | -0.377506 | -0.075575 |
| O | 3.144819  | -0.632519 | -0.197749 |
| C | 2.725367  | 0.607758  | -0.804645 |
| C | 2.817875  | 1.807067  | 0.143185  |
| C | 1.354416  | 0.431643  | -1.472042 |
| N | 0.376893  | -0.189897 | -0.576994 |
| C | 0.839826  | -1.488231 | -0.090461 |
| C | 2.198251  | -1.345755 | 0.622229  |
| C | 2.072766  | -0.787139 | 2.043682  |
| C | -2.151072 | -1.769625 | -0.524725 |
| O | -3.096997 | -2.517078 | -0.269855 |
| H | -0.072883 | 2.414705  | -0.279694 |
| H | -2.154164 | 3.472025  | 0.421530  |
| H | -4.179175 | 2.098526  | 0.940593  |
| H | -4.085568 | -0.366989 | 0.559102  |
| H | 3.459089  | 0.757238  | -1.604636 |
| H | 2.747403  | 2.734749  | -0.436009 |
| H | 3.782868  | 1.802230  | 0.658460  |
| H | 2.025621  | 1.815988  | 0.894691  |
| H | 1.475864  | -0.228703 | -2.344535 |
| H | 0.981588  | 1.388224  | -1.839153 |
| H | 0.946884  | -2.191064 | -0.929456 |
| H | 0.119954  | -1.904595 | 0.615602  |
| H | 2.633034  | -2.349198 | 0.690563  |
| H | 1.593570  | -1.535742 | 2.684358  |
| H | 1.471761  | 0.124377  | 2.086818  |

|   |           |           |           |
|---|-----------|-----------|-----------|
| H | 3.063464  | -0.572318 | 2.454612  |
| H | -1.349260 | -2.129914 | -1.190779 |

### 1b (A, O-State)

$\Delta G = -710.528488$  hartree

|   |           |           |           |
|---|-----------|-----------|-----------|
| C | -0.916389 | 0.240948  | -0.372333 |
| C | -1.008134 | 1.645808  | -0.498392 |
| C | -2.126389 | 2.346615  | -0.057187 |
| C | -3.176696 | 1.620098  | 0.570561  |
| C | -3.149484 | 0.236561  | 0.647259  |
| C | -2.092951 | -0.528883 | 0.076604  |
| O | 3.023564  | -0.488192 | 0.120635  |
| C | 2.617174  | 0.509860  | -0.826763 |
| C | 2.601445  | 1.927858  | -0.250201 |
| C | 1.306289  | 0.081627  | -1.535640 |
| N | 0.292464  | -0.401131 | -0.603612 |
| C | 0.795926  | -1.494428 | 0.229925  |
| C | 2.037912  | -1.022823 | 1.020404  |
| C | 1.700890  | -0.114823 | 2.206310  |
| C | -2.298559 | -1.919602 | -0.186835 |
| O | -1.574134 | -2.661302 | -0.923286 |
| H | -0.154924 | 2.204011  | -0.865587 |
| H | -2.166107 | 3.426474  | -0.137044 |
| H | -4.033919 | 2.155846  | 0.969324  |
| H | -4.004516 | -0.294270 | 1.057907  |
| H | 3.398129  | 0.474359  | -1.593081 |
| H | 2.495958  | 2.652966  | -1.064566 |
| H | 3.552236  | 2.122452  | 0.254139  |
| H | 1.794959  | 2.096528  | 0.465249  |
| H | 1.538273  | -0.764772 | -2.194392 |
| H | 0.907103  | 0.886471  | -2.150594 |
| H | 1.079753  | -2.320937 | -0.425752 |
| H | 0.018417  | -1.829180 | 0.912712  |
| H | 2.515094  | -1.928293 | 1.409368  |
| H | 1.174551  | -0.701478 | 2.966724  |
| H | 1.060953  | 0.727935  | 1.935098  |
| H | 2.620354  | 0.273766  | 2.652991  |
| H | -3.185195 | -2.350893 | 0.311722  |

### 1b (A, H-State)

$\Delta G = -710.530781$  hartree

|   |           |           |           |
|---|-----------|-----------|-----------|
| C | -0.783004 | 0.387537  | -0.346886 |
| C | -0.779955 | 1.795820  | -0.248579 |
| C | -1.889867 | 2.496699  | 0.213766  |
| C | -3.039343 | 1.760940  | 0.610516  |
| C | -3.101413 | 0.383708  | 0.475117  |
| C | -2.029273 | -0.367811 | -0.092140 |
| O | 3.089590  | -0.735299 | -0.043289 |
| C | 2.766855  | 0.470137  | -0.752160 |
| C | 2.846385  | 1.730690  | 0.112844  |
| C | 1.435698  | 0.293683  | -1.524883 |
| N | 0.376162  | -0.284608 | -0.700218 |
| C | 0.784693  | -1.560884 | -0.111173 |
| C | 2.065021  | -1.365417 | 0.738297  |

|   |           |           |           |
|---|-----------|-----------|-----------|
| C | 1.795691  | -0.703213 | 2.092201  |
| C | -2.257347 | -1.719192 | -0.512614 |
| O | -3.335828 | -2.356496 | -0.268898 |
| H | 0.131675  | 2.341467  | -0.459455 |
| H | -1.854834 | 3.574658  | 0.318480  |
| H | -3.900038 | 2.292654  | 1.008124  |
| H | -4.013743 | -0.150245 | 0.715094  |
| H | 3.549890  | 0.541423  | -1.513573 |
| H | 2.800073  | 2.616860  | -0.529198 |
| H | 3.803952  | 1.746685  | 0.641010  |
| H | 2.047015  | 1.801606  | 0.852313  |
| H | 1.609408  | -0.420896 | -2.339037 |
| H | 1.104225  | 1.231936  | -1.965832 |
| H | 1.001512  | -2.264877 | -0.921618 |
| H | -0.010295 | -1.957839 | 0.516471  |
| H | 2.463651  | -2.368472 | 0.920773  |
| H | 1.232021  | -1.397254 | 2.724281  |
| H | 1.216813  | 0.219527  | 2.012095  |
| H | 2.742640  | -0.480141 | 2.591235  |
| H | -1.472045 | -2.216650 | -1.097976 |

### 1b (C)

$\Delta G = -710.610036$  hartree

|   |           |           |           |
|---|-----------|-----------|-----------|
| C | 1.189923  | -0.621799 | 0.004642  |
| C | 1.998310  | -1.732340 | 0.275466  |
| C | 3.385689  | -1.542725 | 0.323565  |
| C | 3.961592  | -0.283958 | 0.105897  |
| C | 3.142045  | 0.821084  | -0.170266 |
| C | 1.763913  | 0.643826  | -0.228911 |
| O | -2.817795 | -0.042096 | -0.872638 |
| C | -2.498712 | -1.347027 | -0.340226 |
| C | -2.986952 | -1.564150 | 1.096095  |
| C | -1.007546 | -1.672566 | -0.525914 |
| N | -0.206162 | -0.548598 | -0.060264 |
| C | -0.534489 | 0.708976  | -0.758512 |
| C | -1.995704 | 1.092659  | -0.492908 |
| C | -2.342954 | 1.623499  | 0.900581  |
| C | 0.657397  | 1.658452  | -0.442683 |
| O | 0.506963  | 2.538660  | 0.683065  |
| H | -0.462079 | 0.516944  | -1.845381 |
| H | 0.512237  | 2.012076  | 1.495625  |
| H | 0.836476  | 2.331009  | -1.283974 |
| H | 1.572437  | -2.715880 | 0.445268  |
| H | 4.026297  | -2.395905 | 0.529269  |
| H | 5.040204  | -0.166633 | 0.142626  |
| H | 3.578790  | 1.800985  | -0.344925 |
| H | -3.065359 | -2.020303 | -0.991955 |
| H | -2.994172 | -2.638143 | 1.313204  |
| H | -4.007521 | -1.187834 | 1.211293  |
| H | -2.346485 | -1.075877 | 1.833756  |
| H | -0.801007 | -1.873245 | -1.591987 |
| H | -0.759426 | -2.573329 | 0.041957  |
| H | -2.279879 | 1.855222  | -1.225946 |
| H | -1.974319 | 2.645614  | 1.008582  |
| H | -1.910806 | 1.019483  | 1.701412  |

|   |           |          |          |
|---|-----------|----------|----------|
| H | -3.430680 | 1.629909 | 1.018650 |
|---|-----------|----------|----------|

### 2b

$\Delta G = -597.295263$  hartree

|   |           |           |           |
|---|-----------|-----------|-----------|
| C | -1.284342 | -0.029549 | -0.068519 |
| C | -1.929300 | 1.168098  | 0.314405  |
| C | -3.314122 | 1.224332  | 0.457373  |
| C | -4.105166 | 0.089669  | 0.234840  |
| C | -3.478681 | -1.100233 | -0.138586 |
| C | -2.089543 | -1.163898 | -0.297116 |
| O | 2.909487  | -0.156404 | -0.684139 |
| C | 2.246692  | 1.122113  | -0.618045 |
| C | 2.482772  | 1.864501  | 0.701470  |
| C | 0.765706  | 0.980896  | -0.979952 |
| N | 0.124797  | -0.064143 | -0.168733 |
| C | 0.772627  | -1.348933 | -0.421237 |
| C | 2.263711  | -1.281561 | -0.056611 |
| C | 2.516341  | -1.360282 | 1.453475  |
| H | -1.340090 | 2.054439  | 0.525763  |
| H | -3.776678 | 2.160282  | 0.758781  |
| H | -5.183493 | 0.135421  | 0.352231  |
| H | -4.070105 | -1.993105 | -0.323030 |
| H | 2.725981  | 1.696745  | -1.418538 |
| H | 2.213555  | 2.919382  | 0.576251  |
| H | 3.539740  | 1.814445  | 0.979100  |
| H | 1.884597  | 1.458402  | 1.520270  |
| H | 0.676195  | 0.724361  | -2.050736 |
| H | 0.268577  | 1.938974  | -0.827711 |
| H | 0.665946  | -1.644589 | -1.480417 |
| H | 0.308832  | -2.124234 | 0.192552  |
| H | 2.751331  | -2.144275 | -0.523867 |
| H | 2.266377  | -2.365737 | 1.810497  |
| H | 1.911973  | -0.643627 | 2.014036  |
| H | 3.572871  | -1.176423 | 1.669905  |
| H | -1.645273 | -2.101152 | -0.609835 |

### 1c (O-State)

$\Delta G = -596.113415$  hartree

|   |           |           |           |
|---|-----------|-----------|-----------|
| C | -0.586838 | -0.281393 | -0.214222 |
| C | -0.895695 | -1.666798 | -0.257131 |
| C | -2.152433 | -2.146663 | 0.086876  |
| C | -3.178741 | -1.276576 | 0.491124  |
| C | -2.923533 | 0.084737  | 0.476707  |
| C | -1.669995 | 0.616114  | 0.088974  |
| C | -1.687567 | 2.055933  | -0.177575 |
| O | -0.828933 | 2.736343  | -0.739922 |
| C | 3.416992  | -0.271964 | 0.533513  |
| C | 2.386701  | 0.566403  | 1.302582  |
| C | 1.336175  | 1.192383  | 0.367320  |
| N | 0.693475  | 0.164528  | -0.464320 |
| C | 1.658088  | -0.635633 | -1.229943 |
| C | 2.713124  | -1.317027 | -0.344896 |
| H | -0.118893 | -2.380246 | -0.503698 |
| H | -3.717898 | 0.784892  | 0.724896  |

|   |           |           |           |
|---|-----------|-----------|-----------|
| H | -2.637040 | 2.538954  | 0.130116  |
| H | 4.019775  | 0.389040  | -0.105778 |
| H | 4.110846  | -0.758349 | 1.228702  |
| H | 2.881480  | 1.372256  | 1.858687  |
| H | 1.872674  | -0.065167 | 2.039768  |
| H | 1.806222  | 1.936773  | -0.288167 |
| H | 0.581995  | 1.710372  | 0.954003  |
| H | 2.168273  | 0.056713  | -1.915765 |
| H | 1.121547  | -1.353137 | -1.852545 |
| H | 3.434551  | -1.839728 | -0.984327 |
| H | 2.232701  | -2.073617 | 0.288806  |
| H | -4.150445 | -1.659178 | 0.784751  |
| H | -2.326311 | -3.219120 | 0.070190  |

### 1c (H-State)

$\Delta G = -596.118823$  hartree

|   |           |           |           |
|---|-----------|-----------|-----------|
| C | -0.451251 | -0.364805 | -0.247881 |
| C | -0.579389 | -1.771043 | -0.136741 |
| C | -1.783935 | -2.355108 | 0.237890  |
| C | -2.915966 | -1.571928 | 0.522538  |
| C | -2.827925 | -0.196667 | 0.368985  |
| C | -1.630638 | 0.419090  | -0.052556 |
| C | -1.678261 | 1.827047  | -0.461108 |
| O | -2.593813 | 2.609657  | -0.200117 |
| C | 3.502186  | 0.115190  | 0.524286  |
| C | 2.378516  | 0.869412  | 1.248767  |
| C | 1.293939  | 1.348764  | 0.269324  |
| N | 0.764686  | 0.239657  | -0.549388 |
| C | 1.822697  | -0.502288 | -1.250735 |
| C | 2.923021  | -1.030847 | -0.318460 |
| H | 0.283448  | -2.406619 | -0.295492 |
| H | -3.697241 | 0.436310  | 0.518708  |
| H | -0.841365 | 2.163847  | -1.098079 |
| H | 4.041175  | 0.811930  | -0.133840 |
| H | 4.232844  | -0.267986 | 1.245620  |
| H | 2.776928  | 1.740592  | 1.783011  |
| H | 1.915614  | 0.214040  | 1.998621  |
| H | 1.710090  | 2.112123  | -0.402801 |
| H | 0.476725  | 1.810727  | 0.823861  |
| H | 2.276302  | 0.195806  | -1.969621 |
| H | 1.367866  | -1.303436 | -1.836445 |
| H | 3.706426  | -1.504050 | -0.922600 |
| H | 2.512549  | -1.805044 | 0.342572  |
| H | -3.845754 | -2.037932 | 0.832138  |
| H | -1.835870 | -3.436068 | 0.335152  |

### 1c (A, O-State)

$\Delta G = -596.033781$  hartree

|   |           |           |           |
|---|-----------|-----------|-----------|
| C | -0.624482 | -0.253815 | -0.234768 |
| C | -0.876570 | -1.637269 | -0.319958 |
| C | -2.121105 | -2.170642 | 0.013753  |
| C | -3.137063 | -1.289454 | 0.468423  |
| C | -2.935110 | 0.080660  | 0.511782  |
| C | -1.714237 | 0.674375  | 0.078145  |

|   |           |           |           |
|---|-----------|-----------|-----------|
| C | -1.641232 | 2.076101  | -0.177974 |
| O | -0.696063 | 2.674359  | -0.792736 |
| C | 3.374935  | -0.343717 | 0.538176  |
| C | 2.315113  | 0.296039  | 1.444173  |
| C | 1.297275  | 1.105044  | 0.615042  |
| N | 0.675367  | 0.227690  | -0.391637 |
| C | 1.631906  | -0.398936 | -1.306518 |
| C | 2.715531  | -1.198187 | -0.552491 |
| H | -0.062256 | -2.310431 | -0.565845 |
| H | -3.754067 | 0.736334  | 0.796313  |
| H | -2.488442 | 2.666312  | 0.213249  |
| H | 3.978443  | 0.446404  | 0.071398  |
| H | 4.060144  | -0.959250 | 1.131315  |
| H | 2.775393  | 0.978903  | 2.166872  |
| H | 1.785204  | -0.475038 | 2.017255  |
| H | 1.803779  | 1.917681  | 0.086435  |
| H | 0.515013  | 1.527864  | 1.242245  |
| H | 2.108042  | 0.421340  | -1.860488 |
| H | 1.087742  | -1.014826 | -2.022038 |
| H | 3.453151  | -1.542149 | -1.285107 |
| H | 2.262210  | -2.090482 | -0.104653 |
| H | -4.103365 | -1.692151 | 0.760361  |
| H | -2.289831 | -3.240400 | -0.030672 |

### 1c (A, H-State)

$\Delta G = -596.037839$  hartree

|   |           |           |           |
|---|-----------|-----------|-----------|
| C | -0.452713 | -0.391736 | -0.211069 |
| C | -0.569517 | -1.795072 | -0.121311 |
| C | -1.771226 | -2.405481 | 0.229694  |
| C | -2.893921 | -1.580830 | 0.504830  |
| C | -2.830377 | -0.201894 | 0.381728  |
| C | -1.643597 | 0.464866  | -0.046093 |
| C | -1.698468 | 1.845561  | -0.425211 |
| O | -2.736032 | 2.574852  | -0.274959 |
| C | 3.538249  | 0.180170  | 0.481508  |
| C | 2.409562  | 0.893097  | 1.235625  |
| C | 1.285384  | 1.341919  | 0.277795  |
| N | 0.782409  | 0.179642  | -0.474380 |
| C | 1.822733  | -0.513966 | -1.243889 |
| C | 2.984854  | -0.984783 | -0.348656 |
| H | 0.315808  | -2.408101 | -0.246574 |
| H | -3.717068 | 0.403399  | 0.532273  |
| H | -0.804334 | 2.287538  | -0.886377 |
| H | 4.044467  | 0.895270  | -0.180715 |
| H | 4.290019  | -0.185938 | 1.189238  |
| H | 2.780476  | 1.785632  | 1.751047  |
| H | 1.981711  | 0.230166  | 1.997432  |
| H | 1.674936  | 2.073374  | -0.439953 |
| H | 0.464495  | 1.788753  | 0.834542  |
| H | 2.200350  | 0.217281  | -1.971113 |
| H | 1.368883  | -1.331882 | -1.801489 |
| H | 3.758814  | -1.413205 | -0.993995 |
| H | 2.631660  | -1.785017 | 0.312712  |
| H | -3.833182 | -2.042208 | 0.799381  |
| H | -1.831427 | -3.482482 | 0.334218  |

**1c (C)** **$\Delta G = -596.113745$  hartree**

|   |           |           |           |
|---|-----------|-----------|-----------|
| C | 0.819141  | -0.594780 | 0.037449  |
| C | 1.694038  | -1.676782 | 0.204696  |
| C | 3.071802  | -1.431175 | 0.123486  |
| C | 3.577013  | -0.147966 | -0.122723 |
| C | 2.691491  | 0.929127  | -0.293643 |
| C | 1.323264  | 0.700059  | -0.220997 |
| C | 0.154987  | 1.662985  | -0.295347 |
| O | 0.024545  | 2.457191  | 0.899876  |
| C | -1.019700 | 0.681380  | -0.542959 |
| N | -0.569788 | -0.563825 | 0.113207  |
| C | -2.419082 | 1.064697  | -0.076491 |
| C | -1.416983 | -1.734327 | -0.070088 |
| C | -2.846630 | -1.402971 | 0.380850  |
| C | -3.376173 | -0.123444 | -0.288896 |
| H | -1.047776 | 0.504807  | -1.635712 |
| H | 0.231888  | 2.395766  | -1.101107 |
| H | 0.089322  | 1.870333  | 1.667765  |
| H | 1.325830  | -2.680373 | 0.391046  |
| H | 3.072140  | 1.929022  | -0.486697 |
| H | 4.648896  | 0.011318  | -0.188110 |
| H | 3.761134  | -2.262089 | 0.247883  |
| H | -2.766307 | 1.943089  | -0.632663 |
| H | -2.390066 | 1.338678  | 0.984431  |
| H | -1.015772 | -2.562943 | 0.520652  |
| H | -1.417698 | -2.051061 | -1.129662 |
| H | -2.851036 | -1.274537 | 1.471019  |
| H | -3.500077 | -2.252252 | 0.151278  |
| H | -3.497195 | -0.301083 | -1.366859 |
| H | -4.370136 | 0.119741  | 0.103258  |

**2c** **$\Delta G = -482.795644$  hartree**

|   |           |           |           |
|---|-----------|-----------|-----------|
| C | 0.717033  | 0.065462  | 0.368742  |
| C | 1.306336  | -1.184206 | 0.057232  |
| C | 2.644386  | -1.277813 | -0.333866 |
| C | 3.447681  | -0.140640 | -0.447608 |
| C | 2.876499  | 1.102795  | -0.152505 |
| C | 1.545924  | 1.209750  | 0.248807  |
| C | -3.054387 | -0.113724 | -0.753175 |
| C | -2.191356 | 1.157644  | -0.811279 |
| C | -1.412002 | 1.357298  | 0.501043  |
| N | -0.599125 | 0.176131  | 0.834916  |
| C | -1.447124 | -1.014834 | 0.967797  |
| C | -2.219026 | -1.332237 | -0.324084 |
| H | 0.723065  | -2.095177 | 0.104491  |
| H | 3.474782  | 2.007462  | -0.225012 |
| H | -3.865799 | 0.036809  | -0.026274 |
| H | -3.531181 | -0.297023 | -1.723156 |
| H | -2.816542 | 2.039275  | -0.999569 |
| H | -1.476423 | 1.086351  | -1.642076 |
| H | -2.117718 | 1.516211  | 1.327513  |

|   |           |           |           |
|---|-----------|-----------|-----------|
| H | -0.787114 | 2.247633  | 0.447176  |
| H | -2.167653 | -0.802946 | 1.769756  |
| H | -0.849870 | -1.862502 | 1.307242  |
| H | -2.863399 | -2.205115 | -0.162354 |
| H | -1.509234 | -1.596559 | -1.118580 |
| H | 4.484918  | -0.218170 | -0.758268 |
| H | 3.052876  | -2.258583 | -0.563810 |
| H | 1.159380  | 2.192443  | 0.491886  |

**1d (O-State)** **$\Delta G = -635.402926$  hartree**

|   |           |           |           |
|---|-----------|-----------|-----------|
| C | -0.775567 | -0.313982 | 0.074195  |
| C | -1.161681 | -1.678605 | 0.165940  |
| C | -2.477276 | -2.080491 | -0.016775 |
| C | -3.491589 | -1.149291 | -0.300143 |
| C | -3.153725 | 0.192832  | -0.336016 |
| C | -1.831597 | 0.646292  | -0.107154 |
| C | 3.249666  | -0.300863 | -0.942217 |
| C | 2.615970  | -1.346036 | -0.012620 |
| C | 1.544718  | -0.730126 | 0.911672  |
| C | 2.147321  | 0.136723  | 2.033886  |
| N | 0.553405  | 0.049096  | 0.135324  |
| C | 1.112837  | 1.067117  | -0.764868 |
| C | 2.157123  | 0.451434  | -1.710788 |
| C | -1.727998 | 2.086297  | 0.138922  |
| O | -0.775971 | 2.711961  | 0.606547  |
| H | -0.404288 | -2.439543 | 0.311895  |
| H | -2.711958 | -3.140600 | 0.026787  |
| H | -4.513322 | -1.472700 | -0.468504 |
| H | -3.927421 | 0.939918  | -0.497933 |
| H | 3.940027  | -0.790250 | -1.638827 |
| H | 3.848005  | 0.411730  | -0.359149 |
| H | 3.379770  | -1.835982 | 0.602616  |
| H | 2.143957  | -2.127931 | -0.621937 |
| H | 2.833430  | -0.467141 | 2.637481  |
| H | 1.355269  | 0.514423  | 2.687362  |
| H | 2.706971  | 0.993296  | 1.648687  |
| H | 1.005529  | -1.540442 | 1.403804  |
| H | 1.554551  | 1.886575  | -0.186549 |
| H | 0.301908  | 1.496502  | -1.350438 |
| H | 2.590832  | 1.254542  | -2.319122 |
| H | 1.650969  | -0.239126 | -2.398960 |
| H | -2.669502 | 2.629562  | -0.081070 |

**1d (H-State)** **$\Delta G = -635.407383$  hartree**

|   |           |           |           |
|---|-----------|-----------|-----------|
| C | -0.628428 | -0.377574 | 0.135605  |
| C | -0.809697 | -1.782071 | 0.109422  |
| C | -2.065519 | -2.341636 | -0.096542 |
| C | -3.199901 | -1.534349 | -0.289463 |
| C | -3.054360 | -0.157043 | -0.224277 |
| C | -1.798455 | 0.435619  | 0.023919  |
| C | 3.260422  | -0.053486 | -1.024292 |
| C | 2.751560  | -1.100559 | -0.022139 |

|   |           |           |           |
|---|-----------|-----------|-----------|
| C | 1.721799  | -0.514020 | 0.967395  |
| C | 2.364428  | 0.400899  | 2.025823  |
| N | 0.631538  | 0.203832  | 0.265106  |
| C | 1.086922  | 1.215826  | -0.711535 |
| C | 2.078824  | 0.627131  | -1.726948 |
| C | -1.753005 | 1.868508  | 0.336433  |
| O | -2.668748 | 2.666988  | 0.130090  |
| H | 0.046882  | -2.439768 | 0.197191  |
| H | -2.158935 | -3.423516 | -0.134937 |
| H | -4.172334 | -1.982542 | -0.465833 |
| H | -3.915583 | 0.498140  | -0.313065 |
| H | 3.918861  | -0.529994 | -1.759535 |
| H | 3.866322  | 0.703279  | -0.508606 |
| H | 3.584815  | -1.535302 | 0.542350  |
| H | 2.280067  | -1.921635 | -0.577598 |
| H | 3.114314  | -0.160997 | 2.592838  |
| H | 1.604140  | 0.761918  | 2.725096  |
| H | 2.863158  | 1.270369  | 1.587877  |
| H | 1.255797  | -1.337294 | 1.513242  |
| H | 1.551905  | 2.054783  | -0.178796 |
| H | 0.216941  | 1.612459  | -1.236119 |
| H | 2.426668  | 1.432409  | -2.385465 |
| H | 1.552859  | -0.102544 | -2.357355 |
| H | -0.834194 | 2.214037  | 0.841844  |

### 1d (A, O-State)

$\Delta G = -635.323682$  hartree

|   |           |           |           |
|---|-----------|-----------|-----------|
| C | 0.829129  | -0.206842 | -0.073114 |
| C | 1.121682  | -1.540893 | -0.345674 |
| C | 2.454034  | -1.981260 | -0.406304 |
| C | 3.497824  | -1.062083 | -0.175155 |
| C | 3.225212  | 0.270158  | 0.091846  |
| C | 1.881957  | 0.748955  | 0.131103  |
| C | -3.039111 | -1.116487 | 0.458889  |
| C | -2.369828 | -1.062200 | -0.922486 |
| C | -1.445810 | 0.174620  | -1.099432 |
| C | -2.240659 | 1.474393  | -1.296780 |
| N | -0.516121 | 0.273952  | 0.052392  |
| C | -1.135357 | 0.256232  | 1.388884  |
| C | -1.993520 | -1.007714 | 1.576964  |
| C | 1.518548  | 2.100631  | 0.327093  |
| O | 0.282847  | 2.499033  | 0.276137  |
| H | 0.317205  | -2.252802 | -0.494843 |
| H | 2.669434  | -3.023123 | -0.619100 |
| H | 4.530229  | -1.399159 | -0.215057 |
| H | 4.037830  | 0.974106  | 0.251314  |
| H | -3.599636 | -2.052936 | 0.555074  |
| H | -3.769449 | -0.303934 | 0.559930  |
| H | -3.120380 | -1.036600 | -1.720108 |
| H | -1.781424 | -1.973655 | -1.075705 |
| H | -2.839627 | 1.381965  | -2.207846 |
| H | -1.559237 | 2.320465  | -1.396486 |
| H | -2.922808 | 1.676861  | -0.466674 |
| H | -0.812968 | 0.022813  | -1.977177 |
| H | -1.759561 | 1.149392  | 1.483203  |

|   |           |           |          |
|---|-----------|-----------|----------|
| H | -0.336217 | 0.321399  | 2.128548 |
| H | -2.472286 | -0.953594 | 2.560996 |
| H | -1.347194 | -1.894046 | 1.581339 |
| H | 2.291551  | 2.847863  | 0.541729 |

### 1d (A, H-State)

$\Delta G = -635.326762$  hartree

|   |           |           |           |
|---|-----------|-----------|-----------|
| C | -0.628022 | -0.407409 | 0.091552  |
| C | -0.794427 | -1.808245 | 0.089210  |
| C | -2.044297 | -2.394858 | -0.095585 |
| C | -3.167784 | -1.548169 | -0.283462 |
| C | -3.050728 | -0.168023 | -0.246064 |
| C | -1.802818 | 0.479894  | -0.002428 |
| C | 3.317770  | 0.006021  | -0.961440 |
| C | 2.819902  | -1.057697 | 0.025826  |
| C | 1.719132  | -0.524218 | 0.972720  |
| C | 2.253322  | 0.438339  | 2.050777  |
| N | 0.646651  | 0.136724  | 0.192105  |
| C | 1.093619  | 1.202403  | -0.723064 |
| C | 2.137802  | 0.637450  | -1.707822 |
| C | -1.768760 | 1.884919  | 0.274548  |
| O | -2.792382 | 2.644875  | 0.192143  |
| H | 0.081596  | -2.444570 | 0.146668  |
| H | -2.144836 | -3.473179 | -0.136956 |
| H | -4.147566 | -1.991578 | -0.442482 |
| H | -3.931038 | 0.458811  | -0.331822 |
| H | 4.011470  | -0.452248 | -1.674746 |
| H | 3.881560  | 0.785609  | -0.434176 |
| H | 3.640991  | -1.441092 | 0.640759  |
| H | 2.413799  | -1.908599 | -0.534491 |
| H | 2.954394  | -0.112190 | 2.684794  |
| H | 1.436360  | 0.805104  | 2.678038  |
| H | 2.782677  | 1.296020  | 1.629741  |
| H | 1.252445  | -1.360321 | 1.493316  |
| H | 1.535353  | 2.014562  | -0.136997 |
| H | 0.228424  | 1.586820  | -1.259202 |
| H | 2.467635  | 1.461375  | -2.349758 |
| H | 1.651877  | -0.105276 | -2.352290 |
| H | -0.810915 | 2.322238  | 0.589108  |

### 1d (C)

$\Delta G = -635.402916$  hartree

|   |           |           |           |
|---|-----------|-----------|-----------|
| C | -0.876388 | -0.493588 | -0.152082 |
| C | -1.652819 | -1.618741 | -0.468807 |
| C | -3.045469 | -1.517380 | -0.349846 |
| C | -3.665059 | -0.334757 | 0.075370  |
| C | -2.879865 | 0.787360  | 0.388157  |
| C | -1.497657 | 0.700798  | 0.280217  |
| C | 3.256249  | 0.389981  | 0.037267  |
| C | 2.810840  | -0.834843 | -0.780055 |
| C | 1.465386  | -1.422987 | -0.303643 |
| C | 1.585039  | -2.224022 | 1.007800  |
| N | 0.498252  | -0.323481 | -0.224632 |
| C | 0.852769  | 0.886712  | 0.546754  |

|   |           |           |           |
|---|-----------|-----------|-----------|
| C | 2.168321  | 1.478614  | 0.052953  |
| C | -0.429372 | 1.759297  | 0.458857  |
| O | -0.427494 | 2.713617  | -0.621525 |
| H | 0.962703  | 0.613121  | 1.611615  |
| H | -0.487448 | 2.230253  | -1.458747 |
| H | -0.549033 | 2.368724  | 1.356878  |
| H | -1.197312 | -2.548332 | -0.794238 |
| H | -3.656024 | -2.384625 | -0.587378 |
| H | -4.745818 | -0.288347 | 0.166632  |
| H | -3.347904 | 1.713056  | 0.713997  |
| H | 4.183062  | 0.794383  | -0.385413 |
| H | 3.490378  | 0.091612  | 1.067698  |
| H | 3.576561  | -1.617843 | -0.742085 |
| H | 2.703297  | -0.539790 | -1.831592 |
| H | 2.254415  | -3.078772 | 0.863250  |
| H | 0.608608  | -2.608303 | 1.319293  |
| H | 1.986063  | -1.617864 | 1.825975  |
| H | 1.104304  | -2.104960 | -1.082535 |
| H | 2.464242  | 2.312166  | 0.700379  |
| H | 2.030246  | 1.882301  | -0.956750 |

## 2d

$\Delta G = -522.082812$  hartree

|   |           |           |           |
|---|-----------|-----------|-----------|
| C | -0.909300 | 0.021124  | 0.264034  |
| C | -1.442342 | -1.090697 | -0.430820 |
| C | -2.809524 | -1.185794 | -0.707113 |
| C | -3.697889 | -0.179467 | -0.321908 |
| C | -3.185143 | 0.930337  | 0.360993  |
| C | -1.826475 | 1.029600  | 0.654062  |
| C | 2.792278  | 0.423877  | -1.133451 |
| C | 2.091936  | -0.931570 | -0.938407 |
| C | 1.360847  | -1.019794 | 0.421230  |
| C | 2.328258  | -1.154178 | 1.610877  |
| N | 0.446541  | 0.127554  | 0.613082  |
| C | 1.119476  | 1.432844  | 0.479789  |
| C | 1.813110  | 1.580797  | -0.885096 |
| H | -0.794524 | -1.885363 | -0.780018 |
| H | -3.173720 | -2.056606 | -1.246308 |
| H | -4.757665 | -0.255706 | -0.544601 |
| H | -3.851549 | 1.725054  | 0.686430  |
| H | 3.208502  | 0.485563  | -2.145829 |
| H | 3.642480  | 0.512022  | -0.443834 |
| H | 2.812069  | -1.754789 | -1.021002 |
| H | 1.356436  | -1.069571 | -1.741631 |
| H | 2.921895  | -2.067606 | 1.497621  |
| H | 1.767824  | -1.223198 | 2.548441  |
| H | 3.026154  | -0.316560 | 1.692676  |
| H | 0.748179  | -1.922842 | 0.431444  |
| H | 1.858374  | 1.533572  | 1.283427  |
| H | 0.395792  | 2.233738  | 0.623987  |
| H | 2.333917  | 2.545670  | -0.924111 |
| H | 1.047719  | 1.594241  | -1.673165 |
| H | -1.479067 | 1.887025  | 1.219749  |

## 1e (O-State)

$\Delta G = -635.391921$  hartree

|   |           |           |           |
|---|-----------|-----------|-----------|
| C | -1.022231 | -0.373617 | 0.032096  |
| C | -1.613373 | -1.643346 | 0.221692  |
| C | -2.993832 | -1.810155 | 0.306123  |
| C | -3.857711 | -0.713136 | 0.204581  |
| C | -3.304052 | 0.541599  | -0.009184 |
| C | -1.910413 | 0.744506  | -0.113678 |
| C | -1.531005 | 2.106556  | -0.515072 |
| O | -0.406720 | 2.551469  | -0.730441 |
| C | 3.695024  | -0.697023 | -0.443928 |
| C | 2.415988  | -1.024978 | -1.238735 |
| C | 1.163776  | -1.401670 | -0.424173 |
| N | 0.370769  | -0.224847 | -0.028359 |
| C | 0.957903  | 0.602223  | 1.045905  |
| C | 2.356501  | 1.172049  | 0.776764  |
| C | 3.492943  | 0.138033  | 0.836985  |
| H | -0.979632 | -2.512691 | 0.346677  |
| H | -3.956340 | 1.403578  | -0.126512 |
| H | -2.407844 | 2.770507  | -0.657163 |
| H | -4.932462 | -0.840319 | 0.280406  |
| H | -3.395320 | -2.805443 | 0.475449  |
| H | 4.378992  | -0.167934 | -1.119823 |
| H | 4.203692  | -1.631215 | -0.173100 |
| H | 2.639590  | -1.860928 | -1.912966 |
| H | 2.143425  | -0.180241 | -1.881819 |
| H | 1.437965  | -2.018732 | 0.449210  |
| H | 0.528790  | -2.015683 | -1.064703 |
| H | 1.002243  | -0.004358 | 1.969582  |
| H | 0.276789  | 1.428639  | 1.236059  |
| H | 2.528130  | 1.920031  | 1.561412  |
| H | 2.359868  | 1.714866  | -0.175490 |
| H | 3.297595  | -0.530751 | 1.686406  |
| H | 4.435796  | 0.646597  | 1.072155  |

## 1e (H-State)

$\Delta G = -635.395108$  hartree

|   |           |           |           |
|---|-----------|-----------|-----------|
| C | 0.905536  | -0.489585 | -0.009505 |
| C | 1.401699  | -1.788703 | -0.235672 |
| C | 2.771720  | -2.024300 | -0.347570 |
| C | 3.693980  | -0.973029 | -0.247424 |
| C | 3.224829  | 0.312088  | -0.004034 |
| C | 1.848211  | 0.566971  | 0.140189  |
| C | 1.414245  | 1.907704  | 0.565333  |
| O | 2.133818  | 2.905937  | 0.573696  |
| C | -3.814176 | -0.381332 | 0.525268  |
| C | -2.560654 | -0.779399 | 1.332346  |
| C | -1.351057 | -1.299392 | 0.534396  |
| N | -0.479638 | -0.207850 | 0.061229  |
| C | -1.000595 | 0.546209  | -1.101216 |
| C | -2.347777 | 1.248515  | -0.887542 |
| C | -3.559374 | 0.302444  | -0.833072 |
| H | 0.712566  | -2.616595 | -0.356791 |
| H | 3.913940  | 1.142446  | 0.115677  |

|   |           |           |           |
|---|-----------|-----------|-----------|
| H | 0.374443  | 1.974129  | 0.928071  |
| H | 4.757989  | -1.162952 | -0.345780 |
| H | 3.121308  | -3.035719 | -0.535155 |
| H | -4.420271 | 0.280824  | 1.156703  |
| H | -4.429843 | -1.272542 | 0.348587  |
| H | -2.850017 | -1.556716 | 2.050122  |
| H | -2.210386 | 0.070679  | 1.929380  |
| H | -1.679619 | -1.946414 | -0.297226 |
| H | -0.750671 | -1.918234 | 1.204287  |
| H | -1.094904 | -0.135979 | -1.966662 |
| H | -0.251557 | 1.291999  | -1.374802 |
| H | -2.473379 | 1.923450  | -1.743468 |
| H | -2.302701 | 1.884921  | 0.005713  |
| H | -3.426391 | -0.461317 | -1.611382 |
| H | -4.463101 | 0.856320  | -1.114425 |

### 1e (A, O-State)

$\Delta G = -635.312574$  hartree

|   |           |           |           |
|---|-----------|-----------|-----------|
| C | -0.816277 | -0.153495 | -0.052005 |
| C | -0.828693 | -1.539167 | -0.176316 |
| C | -2.046451 | -2.238558 | -0.209917 |
| C | -3.258183 | -1.523560 | -0.114715 |
| C | -3.263419 | -0.143057 | 0.007277  |
| C | -2.041125 | 0.591886  | 0.038970  |
| C | -1.944099 | 1.997460  | 0.145379  |
| O | -0.794764 | 2.606706  | 0.154198  |
| C | 2.851337  | -1.169362 | 0.635963  |
| C | 1.938809  | -0.499888 | 1.693327  |
| C | 1.131322  | 0.740521  | 1.252998  |
| N | 0.400111  | 0.603987  | -0.010003 |
| C | 1.121502  | 0.925091  | -1.247332 |
| C | 2.236725  | -0.069165 | -1.618777 |
| C | 3.315428  | -0.297121 | -0.545702 |
| H | 0.106765  | -2.083596 | -0.247231 |
| H | -4.203921 | 0.397257  | 0.076813  |
| H | -2.851298 | 2.607088  | 0.223415  |
| H | -4.202292 | -2.061306 | -0.138497 |
| H | -2.046825 | -3.319270 | -0.305744 |
| H | 2.342379  | -2.048083 | 0.219196  |
| H | 3.733016  | -1.562046 | 1.154914  |
| H | 2.545612  | -0.150605 | 2.537552  |
| H | 1.251191  | -1.247712 | 2.102674  |
| H | 1.795273  | 1.600235  | 1.131996  |
| H | 0.404727  | 0.988871  | 2.030303  |
| H | 1.552988  | 1.921505  | -1.106899 |
| H | 0.384703  | 0.984156  | -2.050873 |
| H | 2.702356  | 0.336378  | -2.525602 |
| H | 1.795265  | -1.032859 | -1.901887 |
| H | 3.708119  | 0.665800  | -0.191082 |
| H | 4.158027  | -0.806882 | -1.027507 |

### 1e (A, H-State)

$\Delta G = -635.317021$  hartree

|   |          |           |           |
|---|----------|-----------|-----------|
| C | 0.912874 | -0.548527 | -0.122608 |
|---|----------|-----------|-----------|

|   |           |           |           |
|---|-----------|-----------|-----------|
| C | 1.520435  | -1.817800 | -0.222698 |
| C | 2.904832  | -1.965288 | -0.217091 |
| C | 3.711024  | -0.801132 | -0.105361 |
| C | 3.150972  | 0.457593  | 0.032522  |
| C | 1.738627  | 0.654396  | 0.090059  |
| C | 1.207288  | 1.928011  | 0.471862  |
| O | 1.926519  | 2.966394  | 0.658178  |
| C | -3.695253 | -0.371354 | 0.700492  |
| C | -2.380887 | -0.903952 | 1.301924  |
| C | -1.359609 | -1.480236 | 0.292770  |
| N | -0.470704 | -0.434006 | -0.234998 |
| C | -1.037790 | 0.524520  | -1.200815 |
| C | -2.319445 | 1.257823  | -0.783683 |
| C | -3.564952 | 0.366910  | -0.646588 |
| H | 0.897343  | -2.687945 | -0.398681 |
| H | 3.783062  | 1.327444  | 0.170694  |
| H | 0.120876  | 2.003748  | 0.620358  |
| H | 4.793499  | -0.900997 | -0.110940 |
| H | 3.353714  | -2.944124 | -0.340051 |
| H | -4.150594 | 0.299249  | 1.439249  |
| H | -4.396846 | -1.204054 | 0.570013  |
| H | -2.613544 | -1.704433 | 2.012566  |
| H | -1.874723 | -0.123882 | 1.880788  |
| H | -1.868080 | -1.978397 | -0.541838 |
| H | -0.736341 | -2.211811 | 0.801984  |
| H | -1.237417 | -0.059636 | -2.113149 |
| H | -0.251208 | 1.236742  | -1.450197 |
| H | -2.492913 | 1.993222  | -1.577814 |
| H | -2.145831 | 1.832376  | 0.134235  |
| H | -3.566155 | -0.357454 | -1.471908 |
| H | -4.460767 | 0.981063  | -0.790468 |

### 1e (C)

$\Delta G = -635.392973$  hartree

|   |           |           |           |
|---|-----------|-----------|-----------|
| C | -0.866878 | -0.610725 | 0.401557  |
| C | -1.507119 | -1.830905 | 0.138671  |
| C | -2.816034 | -1.799784 | -0.366007 |
| C | -3.478923 | -0.592898 | -0.614565 |
| C | -2.828345 | 0.625548  | -0.345779 |
| C | -1.534859 | 0.605398  | 0.151732  |
| C | -0.637581 | 1.733326  | 0.596723  |
| O | -0.714098 | 2.847384  | -0.291416 |
| C | 3.194601  | -0.840056 | -0.805471 |
| C | 2.057709  | -1.780160 | -0.345599 |
| C | 1.409832  | -1.421968 | 1.006876  |
| N | 0.394314  | -0.375003 | 0.937416  |
| C | 0.765400  | 1.040123  | 0.694866  |
| C | 1.651012  | 1.259453  | -0.547220 |
| C | 3.058237  | 0.646370  | -0.413525 |
| H | -0.935228 | 2.062682  | 1.603595  |
| H | -0.366805 | 3.629748  | 0.158442  |
| H | 1.310813  | 1.412457  | 1.570873  |
| H | -1.011594 | -2.781052 | 0.307946  |
| H | -3.329406 | 1.572028  | -0.530053 |
| H | -4.488783 | -0.596483 | -1.013136 |



|   |           |           |           |
|---|-----------|-----------|-----------|
| H | -3.318683 | -2.740361 | -0.575860 |
| H | 3.279390  | -0.916645 | -1.896964 |
| H | 4.148586  | -1.205126 | -0.403694 |
| H | 2.448850  | -2.803716 | -0.288150 |
| H | 1.262240  | -1.804220 | -1.100138 |
| H | 2.170460  | -1.105674 | 1.730497  |
| H | 0.931840  | -2.309579 | 1.434349  |
| H | 1.746766  | 2.341763  | -0.685338 |
| H | 1.142452  | 0.880621  | -1.443226 |
| H | 3.401888  | 0.787100  | 0.620492  |
| H | 3.757485  | 1.220083  | -1.033774 |

## 2e

**$\Delta G = -522.070371$  hartree**

|   |           |           |           |
|---|-----------|-----------|-----------|
| C | 1.171639  | -0.005663 | 0.073241  |
| C | 1.862128  | -1.087736 | -0.507699 |
| C | 3.261503  | -1.103399 | -0.558053 |
| C | 4.008200  | -0.039249 | -0.050391 |
| C | 3.331891  | 1.047441  | 0.520401  |
| C | 1.940290  | 1.062606  | 0.586848  |
| C | -3.540691 | -0.716999 | 0.213571  |
| C | -2.265232 | -1.266788 | 0.881598  |
| C | -0.966763 | -1.228822 | 0.054490  |
| N | -0.244025 | 0.045824  | 0.185065  |
| C | -0.853372 | 1.191216  | -0.519640 |
| C | -2.293160 | 1.544805  | -0.120782 |
| C | -3.358167 | 0.559950  | -0.631606 |
| H | 1.315933  | -1.920200 | -0.936014 |
| H | 3.892387  | 1.881988  | 0.933143  |
| H | 5.093048  | -0.053488 | -0.093776 |
| H | 3.763503  | -1.953809 | -1.011934 |
| H | -4.276031 | -0.527285 | 1.006138  |
| H | -3.981179 | -1.494292 | -0.424114 |
| H | -2.453752 | -2.309933 | 1.164553  |
| H | -2.067203 | -0.729265 | 1.816432  |
| H | -1.169286 | -1.478778 | -1.003047 |
| H | -0.308545 | -2.008054 | 0.443354  |
| H | -0.832744 | 1.007493  | -1.611367 |
| H | -0.221068 | 2.061473  | -0.337653 |
| H | -2.492789 | 2.529490  | -0.562010 |
| H | -2.361225 | 1.672708  | 0.967320  |
| H | -3.094631 | 0.285584  | -1.662072 |
| H | -4.325286 | 1.072784  | -0.699889 |
| H | 1.437453  | 1.898649  | 1.063613  |

## 1f (O-State)

**$\Delta G = -843.142997$  hartree**

|   |           |           |           |
|---|-----------|-----------|-----------|
| C | -2.337692 | -0.309216 | 0.211359  |
| C | -2.456917 | -1.721600 | 0.184215  |
| C | -3.534941 | -2.352858 | -0.424101 |
| C | -4.556021 | -1.613332 | -1.040943 |
| C | -4.491257 | -0.230612 | -0.977630 |
| C | -3.431906 | 0.448418  | -0.331019 |
| C | -3.682297 | 1.874959  | -0.105360 |

|   |           |           |           |
|---|-----------|-----------|-----------|
| O | -3.043520 | 2.655999  | 0.599029  |
| N | 1.648349  | 0.227982  | 0.412290  |
| C | 0.961070  | -0.886150 | 1.066373  |
| C | -0.341988 | -0.387714 | 1.702843  |
| N | -1.221777 | 0.299012  | 0.757283  |
| C | -0.523741 | 1.397054  | 0.083513  |
| C | 0.773764  | 0.898767  | -0.563855 |
| C | 5.741242  | -0.247596 | -0.642442 |
| C | 5.091742  | 0.983674  | -0.799543 |
| C | 3.747979  | 1.130319  | -0.462131 |
| C | 2.999156  | 0.041169  | 0.038090  |
| C | 3.660144  | -1.195277 | 0.186667  |
| C | 5.013652  | -1.328863 | -0.143721 |
| H | -1.664614 | -2.334839 | 0.595779  |
| H | -5.297117 | 0.366506  | -1.397813 |
| H | -4.601867 | 2.235177  | -0.608930 |
| H | 1.596978  | -1.284754 | 1.861268  |
| H | 0.750268  | -1.705516 | 0.356690  |
| H | -0.084401 | 0.334996  | 2.488601  |
| H | -0.871508 | -1.211677 | 2.181961  |
| H | -0.302392 | 2.186115  | 0.811329  |
| H | -1.155697 | 1.824949  | -0.690712 |
| H | 1.289583  | 1.756637  | -0.995824 |
| H | 0.525936  | 0.207057  | -1.388928 |
| H | -5.383045 | -2.110651 | -1.536288 |
| H | -3.563514 | -3.438773 | -0.443347 |
| H | 6.789781  | -0.356985 | -0.901774 |
| H | 5.638764  | 1.843921  | -1.175721 |
| H | 3.283384  | 2.105291  | -0.563621 |
| H | 3.127281  | -2.065086 | 0.551132  |
| H | 5.492395  | -2.296180 | -0.016928 |

## 1f (H-State)

**$\Delta G = -843.148617$  hartree**

|   |           |           |           |
|---|-----------|-----------|-----------|
| C | -2.261284 | -0.383284 | 0.266895  |
| C | -2.310291 | -1.781871 | 0.063171  |
| C | -3.382914 | -2.373766 | -0.595508 |
| C | -4.448978 | -1.602653 | -1.087256 |
| C | -4.442241 | -0.234739 | -0.857761 |
| C | -3.388957 | 0.384811  | -0.154075 |
| C | -3.566244 | 1.775786  | 0.282021  |
| O | -4.421476 | 2.547576  | -0.153264 |
| N | 1.703863  | 0.234793  | 0.454353  |
| C | 1.046073  | -0.933351 | 1.042299  |
| C | -0.252282 | -0.506318 | 1.738666  |
| N | -1.167050 | 0.236898  | 0.870457  |
| C | -0.487117 | 1.378912  | 0.240705  |
| C | 0.802695  | 0.947351  | -0.465430 |
| C | 5.785755  | -0.094187 | -0.694224 |
| C | 5.114845  | 1.134345  | -0.749869 |
| C | 3.774620  | 1.232754  | -0.382156 |
| C | 3.051823  | 0.097032  | 0.047032  |
| C | 3.733770  | -1.135671 | 0.093766  |
| C | 5.083674  | -1.221621 | -0.266283 |
| H | -1.483211 | -2.405572 | 0.380381  |

|   |           |           |           |
|---|-----------|-----------|-----------|
| H | -5.276139 | 0.385817  | -1.171052 |
| H | -2.902557 | 2.106289  | 1.100483  |
| H | 1.704079  | -1.375726 | 1.794760  |
| H | 0.834889  | -1.703931 | 0.280361  |
| H | 0.008561  | 0.153480  | 2.577037  |
| H | -0.761270 | -1.376172 | 2.156545  |
| H | -0.250721 | 2.123569  | 1.011395  |
| H | -1.142756 | 1.845603  | -0.494752 |
| H | 1.295155  | 1.839903  | -0.852258 |
| H | 0.551131  | 0.303662  | -1.327428 |
| H | -5.271796 | -2.072461 | -1.616085 |
| H | -3.375437 | -3.448941 | -0.751177 |
| H | 6.831545  | -0.166337 | -0.976663 |
| H | 5.642203  | 2.029064  | -1.069421 |
| H | 3.292352  | 2.204318  | -0.403707 |
| H | 3.220679  | -2.038837 | 0.401097  |
| H | 5.579730  | -2.187339 | -0.219027 |

### 1f (A, O-State)

$\Delta G = -843.062624$  hartree

|   |           |           |           |
|---|-----------|-----------|-----------|
| C | 2.323968  | -0.247464 | -0.243843 |
| C | 2.725177  | -1.589163 | -0.157121 |
| C | 4.026352  | -1.941685 | 0.215075  |
| C | 4.940668  | -0.907813 | 0.536721  |
| C | 4.580158  | 0.423448  | 0.420142  |
| C | 3.290248  | 0.828170  | -0.045140 |
| C | 3.069262  | 2.193785  | -0.403200 |
| O | 2.064346  | 2.670180  | -1.030768 |
| N | -1.557004 | -0.759240 | 0.592330  |
| C | -0.853316 | -1.619433 | -0.339162 |
| C | 0.094805  | -0.761462 | -1.256761 |
| N | 0.970250  | 0.076753  | -0.470838 |
| C | 0.259346  | 0.931056  | 0.466833  |
| C | -0.633265 | 0.028400  | 1.382896  |
| C | -5.523872 | 0.510395  | -0.198862 |
| C | -4.611869 | 1.383902  | 0.399068  |
| C | -3.298856 | 0.985789  | 0.655907  |
| C | -2.864269 | -0.313865 | 0.317196  |
| C | -3.797923 | -1.195476 | -0.272808 |
| C | -5.103227 | -0.782554 | -0.530196 |
| H | 1.998551  | -2.377380 | -0.324533 |
| H | 5.317254  | 1.198534  | 0.616641  |
| H | 3.878517  | 2.880002  | -0.091506 |
| H | -1.543200 | -2.158883 | -0.984559 |
| H | -0.254893 | -2.346529 | 0.217596  |
| H | -0.543992 | -0.114559 | -1.869770 |
| H | 0.676984  | -1.406928 | -1.913877 |
| H | -0.375024 | 1.628624  | -0.085186 |
| H | 0.972680  | 1.487751  | 1.072148  |
| H | -1.161768 | 0.647203  | 2.106888  |
| H | 0.021352  | -0.652084 | 1.937854  |
| H | 5.948502  | -1.160653 | 0.855874  |
| H | 4.311423  | -2.985169 | 0.288881  |
| H | -6.542851 | 0.827087  | -0.397045 |
| H | -4.915382 | 2.392819  | 0.662734  |

|   |           |           |           |
|---|-----------|-----------|-----------|
| H | -2.620630 | 1.701618  | 1.103576  |
| H | -3.515661 | -2.216762 | -0.501853 |
| H | -5.799677 | -1.484894 | -0.978637 |

### 1f (A, H-State)

$\Delta G = -843.068590$  hartree

|   |           |           |           |
|---|-----------|-----------|-----------|
| C | 2.232608  | -0.377558 | -0.226472 |
| C | 2.584885  | -1.721895 | -0.050194 |
| C | 3.888638  | -2.095018 | 0.299181  |
| C | 4.855644  | -1.079825 | 0.486273  |
| C | 4.544065  | 0.254253  | 0.282750  |
| C | 3.241848  | 0.675102  | -0.139092 |
| C | 3.022334  | 2.028097  | -0.549907 |
| O | 3.902675  | 2.955025  | -0.469644 |
| N | -1.672637 | -0.622101 | 0.603517  |
| C | -0.998776 | -1.616983 | -0.206853 |
| C | -0.009339 | -0.907175 | -1.205957 |
| N | 0.899027  | -0.020209 | -0.515873 |
| C | 0.214696  | 0.963509  | 0.306029  |
| C | -0.728775 | 0.211032  | 1.311516  |
| C | -5.629924 | 0.612212  | -0.263896 |
| C | -4.703584 | 1.525941  | 0.246870  |
| C | -3.393893 | 1.137444  | 0.527849  |
| C | -2.977155 | -0.192879 | 0.301650  |
| C | -3.924213 | -1.113593 | -0.202393 |
| C | -5.226901 | -0.709625 | -0.483802 |
| H | 1.826172  | -2.492194 | -0.135944 |
| H | 5.308017  | 1.018005  | 0.380075  |
| H | 2.042531  | 2.271743  | -0.987483 |
| H | -1.704073 | -2.200318 | -0.793989 |
| H | -0.434850 | -2.294423 | 0.440841  |
| H | -0.618400 | -0.312344 | -1.896334 |
| H | 0.545909  | -1.649118 | -1.778318 |
| H | -0.390966 | 1.621955  | -0.324868 |
| H | 0.938455  | 1.552064  | 0.868139  |
| H | -1.234219 | 0.932520  | 1.951109  |
| H | -0.102614 | -0.424920 | 1.946287  |
| H | 5.867553  | -1.351602 | 0.777250  |
| H | 4.135647  | -3.139558 | 0.453512  |
| H | -6.647391 | 0.921478  | -0.480240 |
| H | -4.994584 | 2.557209  | 0.422607  |
| H | -2.704196 | 1.881779  | 0.905235  |
| H | -3.657102 | -2.154337 | -0.342355 |
| H | -5.934974 | -1.440190 | -0.863184 |

### 1f (C)

$\Delta G = -843.146829$  hartree

|   |          |           |           |
|---|----------|-----------|-----------|
| C | 2.613195 | -0.576239 | -0.053272 |
| C | 3.557691 | -1.609360 | -0.067212 |
| C | 4.913975 | -1.260079 | -0.133377 |
| C | 5.326741 | 0.077336  | -0.188632 |
| C | 4.369690 | 1.105529  | -0.179695 |
| C | 3.021797 | 0.774611  | -0.120770 |
| C | 1.791191 | 1.657929  | -0.030404 |

|   |           |           |           |
|---|-----------|-----------|-----------|
| O | 1.638053  | 2.259895  | 1.268619  |
| N | -1.557344 | -0.316744 | -0.214658 |
| C | -1.001274 | -1.589423 | 0.255657  |
| C | 0.419308  | -1.802896 | -0.279730 |
| N | 1.226883  | -0.646428 | 0.056608  |
| C | 0.682360  | 0.640097  | -0.400714 |
| C | -0.716151 | 0.839363  | 0.160979  |
| C | -5.770409 | 0.245208  | -0.031538 |
| C | -4.943862 | 1.167970  | -0.685706 |
| C | -3.564034 | 0.981532  | -0.733378 |
| C | -2.957231 | -0.134930 | -0.115037 |
| C | -3.796917 | -1.054062 | 0.546083  |
| C | -5.183473 | -0.864597 | 0.577479  |
| H | 1.797336  | 1.584346  | 1.944381  |
| H | 1.797782  | 2.501202  | -0.723504 |
| H | 0.614333  | 0.626171  | -1.503851 |
| H | 3.258594  | -2.651911 | -0.028786 |
| H | 4.679549  | 2.146513  | -0.224414 |
| H | -1.629686 | -2.405079 | -0.108670 |
| H | -0.980387 | -1.638804 | 1.358470  |
| H | 0.387044  | -1.963132 | -1.371576 |
| H | 0.842224  | -2.698677 | 0.183814  |
| H | -1.145138 | 1.755208  | -0.244793 |
| H | -0.671536 | 0.942060  | 1.256743  |
| H | 6.383788  | 0.317662  | -0.246219 |
| H | 5.659438  | -2.050539 | -0.148657 |
| H | -6.845918 | 0.390210  | -0.001518 |
| H | -5.377309 | 2.034632  | -1.177414 |
| H | -2.954626 | 1.695266  | -1.277841 |
| H | -3.380640 | -1.917405 | 1.050811  |
| H | -5.801612 | -1.592597 | 1.096027  |

**2f**

**$\Delta G = -729.824819$  hartree**

|   |           |           |           |
|---|-----------|-----------|-----------|
| C | 2.637641  | -0.158148 | 0.275917  |
| C | 2.985180  | 1.210067  | 0.198283  |
| C | 4.115217  | 1.628753  | -0.509857 |
| C | 4.931599  | 0.712536  | -1.176426 |
| C | 4.595843  | -0.645006 | -1.111231 |
| C | 3.478825  | -1.076735 | -0.398271 |
| N | -1.288790 | -0.304378 | 0.538752  |
| C | -0.490036 | 0.823277  | 1.028900  |
| C | 0.722990  | 0.303136  | 1.812300  |
| N | 1.551022  | -0.617495 | 1.036860  |
| C | 0.732507  | -1.741902 | 0.571560  |
| C | -0.477632 | -1.259496 | -0.237043 |
| C | -5.243852 | 0.462940  | -0.827986 |
| C | -4.751218 | -0.845155 | -0.735843 |
| C | -3.451088 | -1.090249 | -0.299062 |
| C | -2.587742 | -0.028352 | 0.055989  |
| C | -3.091509 | 1.285153  | -0.047341 |
| C | -4.402645 | 1.519575  | -0.476825 |
| H | 2.371404  | 1.963758  | 0.675881  |
| H | 5.216907  | -1.384303 | -1.610185 |
| H | -1.102829 | 1.426587  | 1.704063  |

|   |           |           |           |
|---|-----------|-----------|-----------|
| H | -0.155893 | 1.473155  | 0.201302  |
| H | 0.357391  | -0.246665 | 2.689034  |
| H | 1.319957  | 1.136559  | 2.183779  |
| H | 0.383235  | -2.299553 | 1.449548  |
| H | 1.320958  | -2.424406 | -0.039570 |
| H | -1.083357 | -2.124558 | -0.507615 |
| H | -0.127972 | -0.790044 | -1.173824 |
| H | 5.804165  | 1.043741  | -1.730737 |
| H | 4.344646  | 2.690504  | -0.546498 |
| H | -6.259038 | 0.649792  | -1.164341 |
| H | -5.388535 | -1.686664 | -0.993837 |
| H | -3.113224 | -2.116988 | -0.208651 |
| H | -2.466574 | 2.135764  | 0.195349  |
| H | -4.757433 | 2.544555  | -0.544834 |
| H | 3.276094  | -2.140489 | -0.346543 |

**1g (O-State)**

**$\Delta G = -479.429876$  hartree**

|   |           |           |           |
|---|-----------|-----------|-----------|
| C | 0.031904  | -0.448497 | -0.024264 |
| C | -0.873015 | -1.536596 | -0.137259 |
| C | -2.246857 | -1.351882 | -0.045105 |
| C | -2.798917 | -0.076840 | 0.158570  |
| C | -1.938650 | 1.008685  | 0.204615  |
| C | -0.537386 | 0.868710  | 0.068469  |
| C | 0.170749  | 2.124880  | -0.185988 |
| O | 1.312319  | 2.274453  | -0.622592 |
| C | 2.275335  | 0.082148  | 0.885414  |
| N | 1.390993  | -0.669422 | -0.006487 |
| C | 1.927373  | -1.963228 | -0.416767 |
| H | -0.490445 | -2.543990 | -0.242907 |
| H | -2.342944 | 2.013741  | 0.300122  |
| H | -0.459373 | 3.020378  | -0.011792 |
| H | 3.009347  | 0.670832  | 0.327946  |
| H | 1.699619  | 0.758815  | 1.516280  |
| H | 2.801496  | -0.624849 | 1.538808  |
| H | 2.992739  | -1.842057 | -0.626357 |
| H | 1.441813  | -2.309836 | -1.331379 |
| H | 1.817240  | -2.733784 | 0.361544  |
| H | -3.871190 | 0.057170  | 0.253513  |
| H | -2.897010 | -2.220374 | -0.105739 |

**1g (H-State)**

**$\Delta G = -479.432890$  hartree**

|   |           |           |           |
|---|-----------|-----------|-----------|
| C | 0.364414  | -0.387759 | -0.069007 |
| C | 0.115489  | -1.775832 | -0.028230 |
| C | -1.182890 | -2.267009 | 0.096460  |
| C | -2.279973 | -1.398176 | 0.187496  |
| C | -2.057927 | -0.029292 | 0.107235  |
| C | -0.759310 | 0.490641  | -0.052531 |
| C | -0.607897 | 1.920804  | -0.359249 |
| O | -1.488036 | 2.768240  | -0.210343 |
| C | 2.116674  | 1.020284  | 0.938988  |
| N | 1.666427  | 0.132040  | -0.143840 |
| C | 2.734036  | -0.763894 | -0.581948 |

|   |           |           |           |
|---|-----------|-----------|-----------|
| H | 0.941492  | -2.476057 | -0.058027 |
| H | -2.888017 | 0.670269  | 0.120486  |
| H | 0.362699  | 2.211714  | -0.797712 |
| H | 2.878906  | 1.708267  | 0.561035  |
| H | 1.289092  | 1.605274  | 1.337780  |
| H | 2.551632  | 0.438411  | 1.767412  |
| H | 3.609243  | -0.158749 | -0.833889 |
| H | 2.427653  | -1.310804 | -1.476166 |
| H | 3.034790  | -1.485902 | 0.194569  |
| H | -3.286075 | -1.789867 | 0.296718  |
| H | -1.337818 | -3.341366 | 0.142133  |

### 1g (A, O-State)

$\Delta G = -479.348905$  hartree

|   |           |           |           |
|---|-----------|-----------|-----------|
| C | 0.070791  | -0.378541 | -0.000046 |
| C | 0.912530  | -1.483957 | -0.000020 |
| C | 2.305899  | -1.304084 | -0.000002 |
| C | 2.834513  | 0.003698  | 0.000007  |
| C | 2.002998  | 1.113752  | 0.000010  |
| C | 0.585303  | 0.957291  | -0.000023 |
| C | -0.360173 | 2.007638  | -0.000078 |
| O | -1.644319 | 1.772905  | -0.000232 |
| C | -2.011721 | -0.898922 | 1.243070  |
| N | -1.358061 | -0.507025 | 0.000008  |
| C | -2.011911 | -0.899462 | -1.242787 |
| H | 0.489446  | -2.485034 | 0.000013  |
| H | 2.424894  | 2.115215  | 0.000014  |
| H | -0.034834 | 3.052836  | -0.000060 |
| H | -3.070172 | -0.634348 | 1.194611  |
| H | -1.921632 | -1.983988 | 1.395938  |
| H | -1.540025 | -0.380886 | 2.078318  |
| H | -1.540621 | -0.381448 | -2.078281 |
| H | -3.070438 | -0.635249 | -1.194088 |
| H | -1.921525 | -1.984539 | -1.395450 |
| H | 3.912012  | 0.145223  | 0.000003  |
| H | 2.964494  | -2.166335 | -0.000003 |

### 1g (A, H-State)

$\Delta G = -479.351428$  hartree

|   |           |           |           |
|---|-----------|-----------|-----------|
| C | 0.391019  | -0.402402 | -0.025683 |
| C | 0.195915  | -1.800263 | -0.059701 |
| C | -1.074757 | -2.358219 | 0.042622  |
| C | -2.188994 | -1.486742 | 0.193602  |
| C | -2.043044 | -0.109510 | 0.178768  |
| C | -0.772577 | 0.510288  | -0.015164 |
| C | -0.698427 | 1.906931  | -0.325612 |
| O | -1.710497 | 2.684130  | -0.304543 |
| C | 2.792372  | -0.664971 | -0.567146 |
| N | 1.675908  | 0.107634  | -0.028569 |
| C | 2.078376  | 1.211319  | 0.847201  |
| H | 1.061322  | -2.453118 | -0.078536 |
| H | -2.913047 | 0.535064  | 0.228473  |
| H | 0.279069  | 2.319465  | -0.611128 |
| H | 3.580564  | 0.033085  | -0.857446 |

|   |           |           |           |
|---|-----------|-----------|-----------|
| H | 3.201198  | -1.347326 | 0.189448  |
| H | 2.470443  | -1.233445 | -1.438636 |
| H | 1.209677  | 1.682134  | 1.298987  |
| H | 2.661751  | 1.944681  | 0.284152  |
| H | 2.710538  | 0.799646  | 1.644147  |
| H | -3.183738 | -1.911305 | 0.302848  |
| H | -1.204449 | -3.433948 | 0.060698  |

### 1g (C)

$\Delta G = -479.431326$  hartree

|   |           |           |           |
|---|-----------|-----------|-----------|
| C | 0.138566  | 0.615726  | -0.087593 |
| C | 1.256736  | 1.439896  | -0.279023 |
| C | 2.529613  | 0.863561  | -0.170068 |
| C | 2.698907  | -0.494585 | 0.128872  |
| C | 1.572236  | -1.309279 | 0.327127  |
| C | 0.305474  | -0.749505 | 0.224235  |
| C | -1.057630 | -1.386696 | 0.343457  |
| O | -1.306008 | -2.157540 | -0.852414 |
| C | -1.970956 | -0.145370 | 0.459749  |
| N | -1.212808 | 0.943083  | -0.177863 |
| C | -1.673370 | 2.304337  | 0.034821  |
| H | -1.158451 | -2.041333 | 1.215922  |
| H | -2.146722 | -2.625062 | -0.741606 |
| H | -2.939707 | -0.293913 | -0.026965 |
| H | -2.146260 | 0.084704  | 1.523799  |
| H | 1.150754  | 2.495783  | -0.505202 |
| H | 1.689784  | -2.363243 | 0.565805  |
| H | -2.739702 | 2.362349  | -0.198233 |
| H | -1.147320 | 2.990498  | -0.633585 |
| H | -1.523350 | 2.641167  | 1.074478  |
| H | 3.696950  | -0.913019 | 0.214345  |
| H | 3.404289  | 1.492303  | -0.313859 |

### 2g

$\Delta G = -366.109628$  hartree

|   |           |           |           |
|---|-----------|-----------|-----------|
| C | -0.185923 | -0.000041 | -0.073017 |
| C | 0.551756  | 1.210408  | -0.031675 |
| C | 1.946375  | 1.200662  | 0.017107  |
| C | 2.663391  | -0.000005 | 0.039020  |
| C | 1.946415  | -1.200660 | 0.017229  |
| C | 0.551766  | -1.210434 | -0.031557 |
| C | -2.299146 | -1.243540 | 0.063520  |
| N | -1.573082 | 0.000004  | -0.166873 |
| C | -2.299025 | 1.243586  | 0.063733  |
| H | 0.039981  | 2.164692  | -0.039871 |
| H | 2.474789  | -2.150237 | 0.044206  |
| H | -3.365268 | -1.061852 | -0.076625 |
| H | -1.999191 | -2.012177 | -0.655568 |
| H | -2.145714 | -1.643592 | 1.078455  |
| H | -3.365234 | 1.061840  | -0.075644 |
| H | -1.999554 | 2.012098  | -0.655712 |
| H | -2.144923 | 1.643829  | 1.078482  |
| H | 3.748183  | 0.000047  | 0.079839  |
| H | 2.474782  | 2.150224  | 0.044000  |

H 0.040066 -2.164762 -0.039616

### 1h (O-State)

$\Delta G = -556.799567$  hartree

C 0.443019 -0.323614 0.326488  
C 1.020174 -1.616195 0.340379  
C 2.298420 -1.855834 -0.154465  
C 3.073036 -0.816650 -0.686868  
C 2.552857 0.468836 -0.657893  
C 1.271866 0.757225 -0.133898  
C 1.020273 2.189660 0.060056  
O 0.077623 2.726367 0.640296  
C -2.484825 -0.282407 -1.094602  
C -1.828501 0.597709 -0.056359  
N -0.857431 -0.131932 0.783012  
C -1.468249 -1.169980 1.612293  
C -3.804557 -0.453391 -1.218411  
H 0.440620 -2.455437 0.703621  
H -1.808218 -0.788240 -1.784477  
H 3.156940 1.300398 -1.012452  
H 1.833792 2.825938 -0.341792  
H -4.227933 -1.076445 -2.001408  
H -4.506627 0.032741 -0.543667  
H -2.586742 1.037140 0.600881  
H -1.316167 1.425428 -0.542822  
H -2.358419 -0.746846 2.085080  
H -0.774505 -1.473238 2.399598  
H -1.778313 -2.061675 1.048693  
H 4.061961 -1.007620 -1.089755  
H 2.683557 -2.871707 -0.145270

### 1h (H-State)

$\Delta G = -556.803470$  hartree

C 0.303958 -0.435964 0.355490  
C 0.657433 -1.792048 0.192811  
C 1.896816 -2.151143 -0.333389  
C 2.828213 -1.176326 -0.720109  
C 2.515844 0.162990 -0.524776  
C 1.284755 0.549946 0.038874  
C 1.108661 1.952602 0.444256  
O 1.819069 2.886319 0.072612  
C -2.602478 0.065806 -1.051723  
C -1.806040 0.817130 -0.010668  
N -0.958565 -0.053002 0.837614  
C -1.723144 -1.035271 1.606582  
C -3.930764 0.136586 -1.180086  
H -0.053161 -2.569996 0.445264  
H -2.025259 -0.553498 -1.738926  
H 3.235791 0.941136 -0.758871  
H 0.302190 2.136614 1.175897  
H -4.457264 -0.400734 -1.963973  
H -4.535434 0.742270 -0.507775  
H -2.479856 1.382174 0.643298  
H -1.161134 1.540913 -0.514473

H -2.535839 -0.512555 2.118832  
H -1.079303 -1.490855 2.362264  
H -2.169053 -1.831495 0.993396  
H 3.785728 -1.464951 -1.141397  
H 2.130469 -3.204414 -0.461302

### 1h (A, O-State)

$\Delta G = -556.716782$  hartree

C -0.664610 -0.329835 0.136779  
C -1.314020 -1.558075 0.102891  
C -2.692869 -1.616660 -0.159184  
C -3.405016 -0.420828 -0.386996  
C -2.767754 0.810459 -0.353311  
C -1.369387 0.896268 -0.085308  
C -0.619156 2.091084 -0.011525  
O 0.660057 2.085900 0.249853  
C 3.018977 0.067695 -0.571589  
C 1.654955 -0.550565 -0.715446  
N 0.742907 -0.218760 0.393639  
C 1.199533 -0.478237 1.754750  
C 4.159583 -0.623320 -0.648472  
H -0.751966 -2.471518 0.277450  
H 3.029861 1.147079 -0.436262  
H -3.330389 1.723794 -0.526912  
H -1.096885 3.062334 -0.175112  
H 5.124462 -0.128292 -0.588551  
H 4.167716 -1.703094 -0.780505  
H 1.736009 -1.645935 -0.791272  
H 1.170042 -0.190126 -1.627811  
H 2.208651 -0.084964 1.885722  
H 1.212201 -1.559788 1.953574  
H 0.519589 0.005499 2.456247  
H -4.471716 -0.463230 -0.590315  
H -3.199795 -2.575553 -0.186098

### 1h (A, H-State)

$\Delta G = -556.721348$  hartree

C 0.510215 -0.608025 -0.081547  
C 1.356619 -1.739561 -0.062565  
C 2.727210 -1.618591 0.136725  
C 3.274646 -0.319764 0.339209  
C 2.487975 0.817298 0.276192  
C 1.095911 0.751257 -0.029471  
C 0.392233 1.944677 -0.394349  
O 0.908489 3.109093 -0.329620  
C -3.010345 0.487564 -0.029364  
C -1.780794 0.002201 0.690736  
N -0.859816 -0.777305 -0.168898  
C -1.420782 -2.019146 -0.698025  
C -4.257034 0.259907 0.392491  
H 0.917490 -2.728913 -0.116581  
H -2.839608 1.088186 -0.921712  
H 2.934664 1.800613 0.367800  
H -0.637571 1.843349 -0.761876

|   |           |           |           |
|---|-----------|-----------|-----------|
| H | -5.113109 | 0.672608  | -0.132602 |
| H | -4.462320 | -0.337622 | 1.277752  |
| H | -2.061547 | -0.651104 | 1.528609  |
| H | -1.215720 | 0.836757  | 1.109549  |
| H | -2.450434 | -1.828596 | -1.002325 |
| H | -1.428873 | -2.805031 | 0.068912  |
| H | -0.842649 | -2.352597 | -1.558945 |
| H | 4.340231  | -0.216152 | 0.527235  |
| H | 3.355118  | -2.500013 | 0.193234  |

### 1h (C)

$\Delta G = -556.800946$  hartree

|   |           |           |           |
|---|-----------|-----------|-----------|
| C | 0.787969  | 0.615912  | -0.103896 |
| C | 1.959561  | 1.371642  | -0.249235 |
| C | 3.190514  | 0.721679  | -0.086414 |
| C | 3.265893  | -0.642645 | 0.221888  |
| C | 2.085713  | -1.387825 | 0.374800  |
| C | 0.860112  | -0.753028 | 0.218499  |
| C | -0.538070 | -1.310406 | 0.280987  |
| O | -0.773914 | -2.075696 | -0.915151 |
| C | -2.753311 | -0.095092 | -0.259332 |
| C | -1.395264 | -0.004019 | 0.376705  |
| N | -0.537235 | 1.028349  | -0.248978 |
| C | -0.897075 | 2.422718  | -0.040530 |
| C | -3.904032 | -0.044110 | 0.419210  |
| H | -0.720226 | -1.946206 | 1.154019  |
| H | -1.636825 | -2.508420 | -0.835437 |
| H | -1.511072 | 0.222920  | 1.450648  |
| H | 1.926118  | 2.430626  | -0.482573 |
| H | -2.763244 | -0.218196 | -1.341089 |
| H | 2.129435  | -2.445769 | 0.620278  |
| H | -4.862656 | -0.137115 | -0.082879 |
| H | -3.924231 | 0.090009  | 1.498692  |
| H | -1.956242 | 2.558103  | -0.269601 |
| H | -0.323605 | 3.063436  | -0.714962 |
| H | -0.716496 | 2.751360  | 0.996584  |
| H | 4.232800  | -1.119328 | 0.349697  |
| H | 4.106143  | 1.296733  | -0.195421 |

### 2h

$\Delta G = -443.478761$  hartree

|   |           |           |           |
|---|-----------|-----------|-----------|
| C | 0.521245  | 0.242632  | -0.243083 |
| C | 1.489680  | 1.137114  | 0.279003  |
| C | 2.797790  | 0.718739  | 0.530360  |
| C | 3.196541  | -0.598751 | 0.288464  |
| C | 2.245777  | -1.496329 | -0.209259 |
| C | 0.935029  | -1.095477 | -0.467078 |
| C | -2.433712 | -0.877945 | 0.462352  |
| C | -1.848649 | -0.277917 | -0.795840 |
| N | -0.766296 | 0.680256  | -0.545502 |
| C | -1.181439 | 2.013977  | -0.124774 |
| C | -3.728964 | -0.829173 | 0.789532  |
| H | 1.226999  | 2.166074  | 0.489830  |
| H | -1.727224 | -1.370646 | 1.130183  |

|   |           |           |           |
|---|-----------|-----------|-----------|
| H | 2.520730  | -2.530904 | -0.397773 |
| H | -4.103137 | -1.279713 | 1.704700  |
| H | -4.460394 | -0.341176 | 0.148032  |
| H | -2.631792 | 0.242004  | -1.356155 |
| H | -1.476785 | -1.066971 | -1.456546 |
| H | -2.203283 | 2.186560  | -0.465307 |
| H | -0.545389 | 2.781040  | -0.578292 |
| H | -1.156552 | 2.146495  | 0.967292  |
| H | 4.213779  | -0.919757 | 0.489718  |
| H | 3.508797  | 1.438809  | 0.927186  |
| H | 0.238532  | -1.834831 | -0.842419 |

### 1i (O-State)

$\Delta G = -633.215492$  hartree

|   |           |           |           |
|---|-----------|-----------|-----------|
| C | 0.942288  | -0.349975 | 0.392705  |
| C | 1.594053  | -1.590551 | 0.190478  |
| C | 2.694054  | -1.714536 | -0.652444 |
| C | 3.208069  | -0.605176 | -1.336887 |
| C | 2.625789  | 0.632331  | -1.106993 |
| C | 1.529854  | 0.804902  | -0.230249 |
| C | 1.253417  | 2.208473  | 0.096187  |
| O | 0.499680  | 2.656405  | 0.958946  |
| C | -2.238303 | -0.440883 | -0.238040 |
| C | -1.393301 | 0.413055  | 0.715247  |
| N | -0.192144 | -0.280292 | 1.195548  |
| C | -0.462985 | -1.380170 | 2.122367  |
| O | -3.344212 | 0.354591  | -0.648146 |
| C | -4.226387 | -0.333122 | -1.527487 |
| H | 1.204058  | -2.482344 | 0.664517  |
| H | 3.042877  | 1.517922  | -1.580163 |
| H | 1.862943  | 2.915186  | -0.501360 |
| H | -5.036039 | 0.356208  | -1.775941 |
| H | -4.647416 | -1.228078 | -1.047614 |
| H | -3.711589 | -0.634442 | -2.450882 |
| H | -1.638742 | -0.739862 | -1.112203 |
| H | -2.599162 | -1.356089 | 0.254377  |
| H | -1.996584 | 0.693778  | 1.584968  |
| H | -1.116176 | 1.335797  | 0.213105  |
| H | -1.228294 | -1.048585 | 2.828498  |
| H | 0.440074  | -1.623323 | 2.687322  |
| H | -0.825997 | -2.296400 | 1.634733  |
| H | 4.052857  | -0.706326 | -2.009801 |
| H | 3.139160  | -2.695464 | -0.794106 |

### 1i (H-State)

$\Delta G = -633.218267$  hartree

|   |          |           |           |
|---|----------|-----------|-----------|
| C | 0.838227 | -0.529449 | 0.393997  |
| C | 1.289134 | -1.778415 | -0.081922 |
| C | 2.371044 | -1.863575 | -0.956103 |
| C | 3.042673 | -0.711360 | -1.390037 |
| C | 2.643975 | 0.522920  | -0.892920 |
| C | 1.577525 | 0.631099  | 0.020097  |
| C | 1.365187 | 1.917563  | 0.700924  |
| O | 1.840158 | 2.992560  | 0.336680  |

|   |           |           |           |
|---|-----------|-----------|-----------|
| C | -2.350016 | -0.257281 | -0.207012 |
| C | -1.411246 | 0.423422  | 0.797275  |
| N | -0.285311 | -0.419660 | 1.231134  |
| C | -0.682128 | -1.599754 | 2.001471  |
| O | -3.335482 | 0.699596  | -0.576264 |
| C | -4.295746 | 0.180260  | -1.489324 |
| H | 0.769387  | -2.685628 | 0.202386  |
| H | 3.179127  | 1.428929  | -1.160047 |
| H | 0.775031  | 1.867780  | 1.632917  |
| H | -5.000492 | 0.985108  | -1.708063 |
| H | -4.839622 | -0.668971 | -1.052083 |
| H | -3.818067 | -0.146802 | -2.423674 |
| H | -1.784885 | -0.585214 | -1.093617 |
| H | -2.835013 | -1.141141 | 0.232492  |
| H | -1.980420 | 0.722193  | 1.684300  |
| H | -1.033937 | 1.335801  | 0.333680  |
| H | -1.403047 | -1.286549 | 2.761563  |
| H | 0.190572  | -2.016948 | 2.509636  |
| H | -1.146765 | -2.394950 | 1.400984  |
| H | 3.875385  | -0.786022 | -2.081850 |
| H | 2.680739  | -2.839794 | -1.318571 |

### li (A, O-State)

$\Delta G = -633.127146$  hartree

|   |           |           |           |
|---|-----------|-----------|-----------|
| C | 0.909883  | -0.122624 | 0.327722  |
| C | 0.937826  | -1.431008 | 0.797948  |
| C | 2.002695  | -2.280041 | 0.454424  |
| C | 3.037217  | -1.793711 | -0.371303 |
| C | 3.029122  | -0.486754 | -0.834398 |
| C | 1.969872  | 0.400827  | -0.482890 |
| C | 1.890384  | 1.764658  | -0.843471 |
| O | 0.911514  | 2.524405  | -0.435301 |
| C | -2.367550 | -0.306682 | 0.106179  |
| C | -1.345552 | 0.785905  | -0.240284 |
| N | -0.165179 | 0.779063  | 0.626348  |
| C | -0.308672 | 1.260560  | 1.995924  |
| O | -3.447789 | -0.150595 | -0.801812 |
| C | -4.474561 | -1.119212 | -0.608683 |
| H | 0.131533  | -1.798364 | 1.426364  |
| H | 3.841411  | -0.120647 | -1.456480 |
| H | 2.654273  | 2.219528  | -1.482105 |
| H | -5.251548 | -0.912546 | -1.347089 |
| H | -4.903394 | -1.045167 | 0.400293  |
| H | -4.091193 | -2.137764 | -0.760237 |
| H | -1.919688 | -1.304964 | -0.001269 |
| H | -2.722537 | -0.198119 | 1.142075  |
| H | -1.820614 | 1.766971  | -0.155217 |
| H | -1.007069 | 0.653654  | -1.269925 |
| H | -0.970999 | 2.128589  | 2.006064  |
| H | 0.672651  | 1.542612  | 2.379307  |
| H | -0.730407 | 0.482577  | 2.646581  |
| H | 3.859461  | -2.450355 | -0.642668 |
| H | 2.020590  | -3.301437 | 0.819756  |

### li (A, H-State)

$\Delta G = -633.131363$  hartree

|   |           |           |           |
|---|-----------|-----------|-----------|
| C | -1.112038 | -0.611600 | 0.077738  |
| C | -2.213531 | -1.490005 | -0.031662 |
| C | -3.498907 | -1.018328 | -0.270750 |
| C | -3.694031 | 0.384895  | -0.421255 |
| C | -2.651393 | 1.281942  | -0.271680 |
| C | -1.335450 | 0.853112  | 0.075448  |
| C | -0.370777 | 1.813205  | 0.520155  |
| O | -0.575471 | 3.071923  | 0.501012  |
| C | 2.581263  | -0.376750 | 0.189831  |
| C | 1.279094  | -0.579167 | -0.591142 |
| N | 0.167984  | -1.126014 | 0.206060  |
| C | 0.358339  | -2.494936 | 0.688607  |
| O | 3.473661  | 0.268974  | -0.703883 |
| C | 4.754079  | 0.512586  | -0.127079 |
| H | -2.040901 | -2.559720 | -0.018145 |
| H | -2.832108 | 2.349207  | -0.327195 |
| H | 0.586365  | 1.439754  | 0.906796  |
| H | 5.356486  | 1.010044  | -0.889166 |
| H | 5.241403  | -0.427632 | 0.165390  |
| H | 4.672677  | 1.163409  | 0.754178  |
| H | 2.405468  | 0.244607  | 1.080668  |
| H | 3.010189  | -1.332076 | 0.522166  |
| H | 1.456123  | -1.277928 | -1.420352 |
| H | 0.966626  | 0.369089  | -1.025682 |
| H | 1.370374  | -2.597115 | 1.079443  |
| H | 0.230977  | -3.220069 | -0.125694 |
| H | -0.351293 | -2.709086 | 1.486283  |
| H | -4.689850 | 0.762144  | -0.639270 |
| H | -4.323820 | -1.709428 | -0.398148 |

### li (C)

$\Delta G = -633.216826$  hartree

|   |           |           |           |
|---|-----------|-----------|-----------|
| C | 1.025219  | -0.684183 | -0.290320 |
| C | 1.945407  | -1.631017 | 0.178421  |
| C | 3.155968  | -1.166148 | 0.717075  |
| C | 3.445256  | 0.199902  | 0.799580  |
| C | 2.511290  | 1.141624  | 0.327353  |
| C | 1.312845  | 0.692706  | -0.203391 |
| C | 0.167940  | 1.448801  | -0.834192 |
| O | -0.124145 | 2.651338  | -0.126427 |
| C | -1.903113 | 0.506087  | 0.369155  |
| C | -0.977631 | 0.377391  | -0.845905 |
| N | -0.210273 | -0.887348 | -0.892065 |
| C | -0.862389 | -2.185198 | -0.874316 |
| O | -3.036295 | -0.336801 | 0.179773  |
| C | -3.960511 | -0.255050 | 1.257021  |
| H | 0.419154  | 1.697385  | -1.875610 |
| H | -0.617117 | 3.246468  | -0.707858 |
| H | -1.591315 | 0.462319  | -1.749347 |
| H | 1.735575  | -2.694650 | 0.136372  |
| H | 2.721740  | 2.205992  | 0.385532  |
| H | -4.794281 | -0.919004 | 1.018850  |

|   |           |           |           |
|---|-----------|-----------|-----------|
| H | -4.338110 | 0.770484  | 1.379683  |
| H | -3.500456 | -0.577424 | 2.202199  |
| H | -1.370694 | 0.228493  | 1.292435  |
| H | -2.229816 | 1.549568  | 0.472152  |
| H | -1.760558 | -2.142979 | -1.492427 |
| H | -1.155195 | -2.508566 | 0.135591  |
| H | -0.187959 | -2.936022 | -1.298243 |
| H | 4.384941  | 0.533394  | 1.229046  |
| H | 3.877832  | -1.889812 | 1.086435  |

## 2i

$\Delta G = -519.896985$  hartree

|   |           |           |           |
|---|-----------|-----------|-----------|
| C | -1.100412 | 0.292501  | 0.067558  |
| C | -2.355154 | 0.888673  | -0.214583 |
| C | -3.514056 | 0.115290  | -0.306217 |
| C | -3.478759 | -1.269574 | -0.119257 |
| C | -2.245361 | -1.869530 | 0.159096  |
| C | -1.076654 | -1.114160 | 0.247952  |
| C | 2.251887  | -0.017202 | -0.303376 |
| C | 1.277946  | 0.531636  | 0.743375  |
| N | 0.054885  | 1.058597  | 0.147831  |
| C | -0.004892 | 2.494127  | -0.094324 |
| O | 3.409124  | -0.487236 | 0.376443  |
| C | 4.391483  | -1.020763 | -0.503624 |
| H | -2.432799 | 1.959825  | -0.354139 |
| H | -2.183728 | -2.945304 | 0.301938  |
| H | 5.230727  | -1.351788 | 0.111627  |
| H | 4.742363  | -0.259760 | -1.215064 |
| H | 3.995887  | -1.877758 | -1.067051 |
| H | 1.784586  | -0.835043 | -0.872775 |
| H | 2.524241  | 0.775428  | -1.017613 |
| H | 1.772718  | 1.333543  | 1.301292  |
| H | 1.040053  | -0.251077 | 1.470328  |
| H | 1.010229  | 2.892742  | -0.113636 |
| H | -0.570128 | 3.029274  | 0.684070  |
| H | -0.464697 | 2.712522  | -1.063982 |
| H | -4.383674 | -1.864837 | -0.190731 |
| H | -4.457011 | 0.611478  | -0.521243 |
| H | -0.142126 | -1.627537 | 0.441024  |

## 1j (O-State)

$\Delta G = -710.421777$  hartree

|   |           |           |           |
|---|-----------|-----------|-----------|
| C | 1.376577  | -0.073653 | 0.529279  |
| C | 1.654944  | -1.342356 | 1.093739  |
| C | 2.673634  | -2.154131 | 0.605467  |
| C | 3.474715  | -1.742436 | -0.468872 |
| C | 3.263639  | -0.476771 | -0.995624 |
| C | 2.262922  | 0.391826  | -0.502712 |
| C | 2.387259  | 1.773868  | -0.978037 |
| O | 1.787999  | 2.772274  | -0.580783 |
| C | -0.643443 | 1.305689  | 0.066019  |
| N | 0.311896  | 0.681532  | 1.000527  |
| C | -0.255365 | 0.366119  | 2.309671  |
| C | -4.183720 | -1.094176 | -0.682784 |

|   |           |           |           |
|---|-----------|-----------|-----------|
| C | -2.931405 | -1.524216 | -1.138091 |
| C | -1.793316 | -0.751743 | -0.895166 |
| C | -1.884386 | 0.460061  | -0.190649 |
| C | -3.142992 | 0.880324  | 0.259634  |
| C | -4.287099 | 0.111862  | 0.015231  |
| H | 1.031402  | -1.718040 | 1.895291  |
| H | 3.911122  | -0.109373 | -1.788155 |
| H | 3.168974  | 1.891454  | -1.755001 |
| H | -0.939378 | 2.277163  | 0.475474  |
| H | -0.133605 | 1.501628  | -0.873473 |
| H | -0.860448 | 1.217055  | 2.633617  |
| H | 0.546092  | 0.221188  | 3.037456  |
| H | -0.899026 | -0.524938 | 2.307579  |
| H | 4.254477  | -2.385966 | -0.862032 |
| H | 2.826860  | -3.131625 | 1.054383  |
| H | -5.069330 | -1.693276 | -0.873879 |
| H | -2.843295 | -2.457251 | -1.687556 |
| H | -0.827180 | -1.091248 | -1.259161 |
| H | -3.231382 | 1.817269  | 0.804331  |
| H | -5.254329 | 0.455436  | 0.371071  |

## 1j (H-State)

$\Delta G = -710.423862$  hartree

|   |           |           |           |
|---|-----------|-----------|-----------|
| C | -1.229362 | 0.078317  | 0.679226  |
| C | -1.262274 | 1.398765  | 1.172970  |
| C | -2.192211 | 2.319686  | 0.693396  |
| C | -3.119529 | 1.961825  | -0.295910 |
| C | -3.131589 | 0.652760  | -0.761122 |
| C | -2.226097 | -0.304728 | -0.265698 |
| C | -2.436282 | -1.717947 | -0.614283 |
| O | -3.158262 | -2.116560 | -1.527726 |
| C | 0.642832  | -1.452914 | 0.107349  |
| N | -0.268598 | -0.851481 | 1.113100  |
| C | 0.366491  | -0.616244 | 2.409338  |
| C | 4.104213  | 0.979644  | -0.860736 |
| C | 2.857180  | 1.272132  | -1.424726 |
| C | 1.745393  | 0.484512  | -1.114937 |
| C | 1.859054  | -0.604338 | -0.234968 |
| C | 3.114767  | -0.890173 | 0.319724  |
| C | 4.231175  | -0.105433 | 0.011230  |
| H | -0.534001 | 1.719064  | 1.908477  |
| H | -3.872966 | 0.326950  | -1.484260 |
| H | -1.932666 | -2.447698 | 0.043746  |
| H | 0.968097  | -2.422366 | 0.499294  |
| H | 0.074447  | -1.646387 | -0.803148 |
| H | 0.865286  | -1.538616 | 2.720579  |
| H | -0.396892 | -0.373380 | 3.151937  |
| H | 1.117717  | 0.186470  | 2.398452  |
| H | -3.831156 | 2.689001  | -0.673326 |
| H | -2.179213 | 3.334140  | 1.082032  |
| H | 4.969667  | 1.589162  | -1.104140 |
| H | 2.752465  | 2.108069  | -2.110555 |
| H | 0.783866  | 0.713383  | -1.566848 |
| H | 3.222492  | -1.736317 | 0.994171  |
| H | 5.196563  | -0.343807 | 0.448574  |



**1j (A, O-State)** $\Delta G = -710.337300$  hartree

|   |           |           |           |
|---|-----------|-----------|-----------|
| C | -1.306852 | 0.072784  | 0.338950  |
| C | -0.969296 | 1.296607  | 0.906600  |
| C | -1.848246 | 2.386938  | 0.801475  |
| C | -3.068190 | 2.229819  | 0.111320  |
| C | -3.423315 | 1.010799  | -0.446315 |
| C | -2.559753 | -0.118018 | -0.331825 |
| C | -2.851813 | -1.422317 | -0.791017 |
| O | -2.037965 | -2.420108 | -0.583190 |
| C | 0.559919  | -1.244082 | -0.692380 |
| N | -0.436259 | -1.063776 | 0.386167  |
| C | -0.161218 | -1.675759 | 1.679770  |
| C | 4.199097  | 1.029981  | -0.089860 |
| C | 3.142636  | 1.576868  | -0.825278 |
| C | 1.969906  | 0.841769  | -1.020182 |
| C | 1.837710  | -0.447915 | -0.483356 |
| C | 2.907897  | -0.992291 | 0.243121  |
| C | 4.080608  | -0.258287 | 0.441801  |
| H | -0.018083 | 1.410108  | 1.417469  |
| H | -4.375299 | 0.898557  | -0.958251 |
| H | -3.777968 | -1.626504 | -1.338122 |
| H | 0.778746  | -2.313613 | -0.743674 |
| H | 0.072124  | -0.950059 | -1.623029 |
| H | 0.213182  | -2.690628 | 1.527521  |
| H | -1.082915 | -1.707307 | 2.261510  |
| H | 0.591072  | -1.100044 | 2.235435  |
| H | -3.746564 | 3.074234  | 0.023158  |
| H | -1.581482 | 3.342184  | 1.241444  |
| H | 5.111257  | 1.600009  | 0.060417  |
| H | 3.232146  | 2.572358  | -1.250329 |
| H | 1.155255  | 1.269599  | -1.597751 |
| H | 2.829986  | -1.998648 | 0.646117  |
| H | 4.901556  | -0.694332 | 1.003484  |

**1j (A, H-State)** $\Delta G = -710.341070$  hartree

|   |           |           |           |
|---|-----------|-----------|-----------|
| C | 1.639092  | -0.608772 | -0.062342 |
| C | 2.664572  | -1.568532 | -0.227952 |
| C | 4.007770  | -1.221903 | -0.152361 |
| C | 4.348070  | 0.134336  | 0.120162  |
| C | 3.378320  | 1.113606  | 0.240401  |
| C | 1.991813  | 0.827697  | 0.060339  |
| C | 1.071675  | 1.912528  | -0.118329 |
| O | 1.405978  | 3.136770  | 0.009147  |
| C | -0.629532 | -0.452177 | 0.946072  |
| N | 0.318205  | -1.018220 | -0.031767 |
| C | -0.053310 | -2.340594 | -0.539613 |
| C | -4.632608 | 0.384032  | -0.474905 |
| C | -3.548478 | 0.516155  | -1.347561 |
| C | -2.251834 | 0.233630  | -0.907893 |
| C | -2.023887 | -0.192687 | 0.408647  |
| C | -3.118285 | -0.334466 | 1.274192  |

|   |           |           |           |
|---|-----------|-----------|-----------|
| C | -4.413415 | -0.042465 | 0.838938  |
| H | 2.399959  | -2.613533 | -0.333572 |
| H | 3.659216  | 2.150296  | 0.385086  |
| H | 0.035810  | 1.677138  | -0.390884 |
| H | -0.684606 | -1.166439 | 1.779568  |
| H | -0.190958 | 0.461115  | 1.353256  |
| H | -1.132489 | -2.364545 | -0.686633 |
| H | 0.215871  | -3.124397 | 0.179926  |
| H | 0.443869  | -2.529852 | -1.490626 |
| H | 5.394924  | 0.410634  | 0.216466  |
| H | 4.777292  | -1.979772 | -0.240586 |
| H | -5.639162 | 0.606131  | -0.816598 |
| H | -3.708765 | 0.840738  | -2.371492 |
| H | -1.419389 | 0.334388  | -1.598252 |
| H | -2.957269 | -0.675115 | 2.293840  |
| H | -5.249341 | -0.155734 | 1.522924  |

**1j (C)** $\Delta G = -710.422106$  hartree

|   |           |           |           |
|---|-----------|-----------|-----------|
| C | -1.813421 | 0.600995  | 0.019507  |
| C | -2.994520 | 1.320174  | 0.246736  |
| C | -4.204382 | 0.613185  | 0.278472  |
| C | -4.250656 | -0.772536 | 0.080370  |
| C | -3.062435 | -1.481856 | -0.157271 |
| C | -1.858599 | -0.790078 | -0.195050 |
| C | -0.450858 | -1.296243 | -0.374430 |
| O | -0.052802 | -1.940254 | 0.846310  |
| C | 0.317507  | 0.035311  | -0.680669 |
| N | -0.499899 | 1.074753  | -0.022651 |
| C | -0.240956 | 2.459652  | -0.389792 |
| C | 4.504082  | -0.054026 | 0.421145  |
| C | 3.539357  | 0.282403  | 1.376722  |
| C | 2.186710  | 0.325979  | 1.027047  |
| C | 1.778747  | 0.039586  | -0.284971 |
| C | 2.755067  | -0.288568 | -1.238015 |
| C | 4.107824  | -0.340367 | -0.888948 |
| H | -0.334028 | -1.998072 | -1.207637 |
| H | 0.877146  | -2.201079 | 0.766626  |
| H | 0.254197  | 0.172869  | -1.774206 |
| H | -2.985028 | 2.394597  | 0.396667  |
| H | -3.084517 | -2.556490 | -0.318618 |
| H | 0.826267  | 2.666234  | -0.285330 |
| H | -0.779147 | 3.132623  | 0.281901  |
| H | -0.542888 | 2.679928  | -1.427164 |
| H | -5.202435 | -1.294177 | 0.102142  |
| H | -5.127220 | 1.159729  | 0.453140  |
| H | 5.554996  | -0.086521 | 0.693606  |
| H | 3.839252  | 0.511387  | 2.395422  |
| H | 1.439919  | 0.592204  | 1.768263  |
| H | 2.454904  | -0.500897 | -2.261391 |
| H | 4.849498  | -0.595243 | -1.640470 |

**2j** $\Delta G = -597.102969$  hartree

|   |           |           |           |
|---|-----------|-----------|-----------|
| C | 1.614140  | 0.322818  | -0.143883 |
| C | 2.863061  | 0.640218  | 0.446593  |
| C | 3.859731  | -0.328172 | 0.580499  |
| C | 3.661261  | -1.639333 | 0.137526  |
| C | 2.429857  | -1.965063 | -0.441837 |
| C | 1.420425  | -1.012541 | -0.579876 |
| C | -0.552203 | 1.028776  | -1.104540 |
| N | 0.620693  | 1.281520  | -0.280942 |
| C | 0.840390  | 2.635316  | 0.210822  |
| C | -3.926520 | -0.919070 | 0.818044  |
| C | -2.876513 | -0.421523 | 1.594648  |
| C | -1.778302 | 0.195682  | 0.984252  |
| C | -1.714665 | 0.323506  | -0.407938 |
| C | -2.771092 | -0.182650 | -1.181076 |
| C | -3.869565 | -0.797746 | -0.575460 |
| H | 3.064191  | 1.645727  | 0.795299  |
| H | 2.242594  | -2.978505 | -0.787358 |
| H | -0.907178 | 1.994889  | -1.479143 |
| H | -0.266476 | 0.456048  | -1.996090 |
| H | -0.081356 | 3.207016  | 0.099444  |
| H | 1.638034  | 3.156994  | -0.338896 |
| H | 1.103659  | 2.633924  | 1.274876  |
| H | 4.441109  | -2.386960 | 0.243802  |
| H | 4.805623  | -0.044750 | 1.034954  |
| H | -4.778332 | -1.399274 | 1.290879  |
| H | -2.908512 | -0.514010 | 2.676751  |
| H | -0.961128 | 0.574854  | 1.590540  |
| H | -2.733123 | -0.097019 | -2.265062 |
| H | -4.677545 | -1.185293 | -1.189808 |
| H | 0.473569  | -1.315590 | -1.010225 |

### 1k (O-State)

$\Delta G = -824.924016$  hartree

|   |           |           |           |
|---|-----------|-----------|-----------|
| C | -2.042625 | 0.055926  | 0.529821  |
| C | -2.064330 | 1.157791  | 1.418871  |
| C | -2.776578 | 2.318366  | 1.132494  |
| C | -3.511363 | 2.441256  | -0.054637 |
| C | -3.557610 | 1.351367  | -0.911433 |
| C | -2.876085 | 0.143295  | -0.638804 |
| C | -3.274825 | -0.972005 | -1.504097 |
| O | -2.987153 | -2.162959 | -1.392783 |
| C | -0.365132 | -1.629295 | -0.200542 |
| N | -1.274019 | -1.064025 | 0.820228  |
| C | -0.814898 | -1.263014 | 2.192918  |
| C | 3.629930  | 0.086189  | -0.133136 |
| C | 2.562992  | 0.808938  | -0.685538 |
| C | 1.283427  | 0.243124  | -0.702843 |
| C | 1.033171  | -1.030761 | -0.177185 |
| C | 2.117675  | -1.737521 | 0.367608  |
| C | 3.400245  | -1.194525 | 0.391921  |
| O | 4.919339  | 0.538917  | -0.067712 |
| C | 5.216197  | 1.834164  | -0.595854 |
| H | -1.475472 | 1.122604  | 2.326855  |
| H | -4.169940 | 1.399136  | -1.808667 |
| H | -3.962234 | -0.660310 | -2.315756 |

|   |           |           |           |
|---|-----------|-----------|-----------|
| H | -0.305818 | -2.709582 | -0.032149 |
| H | -0.814581 | -1.488568 | -1.179347 |
| H | -1.640732 | -1.100735 | 2.889147  |
| H | -0.482360 | -2.299517 | 2.294411  |
| H | 0.023087  | -0.610462 | 2.477023  |
| H | -4.049401 | 3.354314  | -0.286142 |
| H | -2.736363 | 3.146015  | 1.835277  |
| H | 2.712764  | 1.795885  | -1.106466 |
| H | 0.470051  | 0.813616  | -1.143697 |
| H | 1.958876  | -2.732767 | 0.775791  |
| H | 4.234093  | -1.749052 | 0.811370  |
| H | 6.284393  | 1.981212  | -0.436293 |
| H | 4.656808  | 2.614807  | -0.068212 |
| H | 4.996339  | 1.884142  | -1.668164 |

### 1k (H-State)

$\Delta G = -824.927021$  hartree

|   |           |           |           |
|---|-----------|-----------|-----------|
| C | -1.944511 | -0.054416 | 0.653741  |
| C | -1.770143 | 1.005311  | 1.567712  |
| C | -2.425389 | 2.222146  | 1.387119  |
| C | -3.273892 | 2.430187  | 0.289994  |
| C | -3.491734 | 1.383045  | -0.596793 |
| C | -2.869084 | 0.133387  | -0.415331 |
| C | -3.311339 | -0.999692 | -1.241953 |
| O | -3.972933 | -0.899820 | -2.274978 |
| C | -0.354361 | -1.701068 | -0.313375 |
| N | -1.255076 | -1.271599 | 0.789121  |
| C | -0.754945 | -1.621605 | 2.117987  |
| C | 3.610940  | 0.074254  | -0.195990 |
| C | 2.533402  | 0.793626  | -0.731539 |
| C | 1.263914  | 0.206457  | -0.768388 |
| C | 1.035100  | -1.086212 | -0.280174 |
| C | 2.131197  | -1.791023 | 0.245199  |
| C | 3.403093  | -1.226008 | 0.289982  |
| O | 4.891074  | 0.547859  | -0.111758 |
| C | 5.166018  | 1.864662  | -0.597433 |
| H | -1.091113 | 0.890914  | 2.404338  |
| H | -4.184609 | 1.491361  | -1.425603 |
| H | -3.054404 | -1.999759 | -0.850730 |
| H | -0.276393 | -2.792214 | -0.260333 |
| H | -0.833424 | -1.457390 | -1.262423 |
| H | -1.540228 | -1.458600 | 2.859615  |
| H | -0.498254 | -2.684981 | 2.119858  |
| H | 0.139508  | -1.057861 | 2.419676  |
| H | -3.769464 | 3.385382  | 0.149707  |
| H | -2.255520 | 3.024141  | 2.100072  |
| H | 2.666969  | 1.794519  | -1.123865 |
| H | 0.441734  | 0.774381  | -1.195830 |
| H | 1.989855  | -2.801369 | 0.621139  |
| H | 4.246037  | -1.777849 | 0.694402  |
| H | 6.230290  | 2.026701  | -0.426805 |
| H | 4.588769  | 2.617248  | -0.048830 |
| H | 4.951062  | 1.943954  | -1.668908 |

**1k (A, O-State)** $\Delta G = -824.839976$  hartree

|   |           |           |           |
|---|-----------|-----------|-----------|
| C | -1.951045 | 0.193707  | 0.347921  |
| C | -1.352794 | 1.279603  | 0.978084  |
| C | -1.945619 | 2.550656  | 0.903921  |
| C | -3.144844 | 2.714686  | 0.179967  |
| C | -3.759233 | 1.637491  | -0.440736 |
| C | -3.192194 | 0.331687  | -0.357152 |
| C | -3.773015 | -0.846894 | -0.878260 |
| O | -3.232013 | -2.018644 | -0.693568 |
| C | -0.421635 | -1.488414 | -0.709582 |
| N | -1.374093 | -1.116897 | 0.362235  |
| C | -1.281928 | -1.822679 | 1.633550  |
| C | 3.611446  | -0.040362 | -0.026137 |
| C | 2.714960  | 0.713924  | -0.795419 |
| C | 1.418162  | 0.233451  | -1.008256 |
| C | 0.990251  | -0.986741 | -0.472845 |
| C | 1.908465  | -1.733905 | 0.286437  |
| C | 3.200642  | -1.271765 | 0.511502  |
| O | 4.897277  | 0.328972  | 0.246017  |
| C | 5.378893  | 1.570840  | -0.276733 |
| H | -0.417988 | 1.144269  | 1.513368  |
| H | -4.693894 | 1.774460  | -0.978022 |
| H | -4.701357 | -0.799537 | -1.457242 |
| H | -0.439570 | -2.579161 | -0.779075 |
| H | -0.823451 | -1.081311 | -1.638836 |
| H | -2.197899 | -1.655614 | 2.200989  |
| H | -1.154439 | -2.891042 | 1.444735  |
| H | -0.427871 | -1.462895 | 2.222853  |
| H | -3.601638 | 3.698692  | 0.115693  |
| H | -1.475455 | 3.397083  | 1.393615  |
| H | 3.008601  | 1.660492  | -1.232583 |
| H | 0.734980  | 0.825295  | -1.611218 |
| H | 1.614847  | -2.695746 | 0.698128  |
| H | 3.908406  | -1.854032 | 1.093117  |
| H | 6.410089  | 1.655188  | 0.065742  |
| H | 4.794837  | 2.414102  | 0.107950  |
| H | 5.355264  | 1.573710  | -1.372018 |

**1k (A, H-State)** $\Delta G = -824.845892$  hartree

|   |           |           |           |
|---|-----------|-----------|-----------|
| C | 2.402609  | -0.551150 | -0.176137 |
| C | 3.454067  | -1.423881 | -0.539910 |
| C | 4.780129  | -1.008022 | -0.541938 |
| C | 5.076901  | 0.327126  | -0.145220 |
| C | 4.075180  | 1.227573  | 0.170222  |
| C | 2.693595  | 0.881149  | 0.077669  |
| C | 1.709057  | 1.923121  | 0.098664  |
| O | 1.992777  | 3.145289  | 0.328318  |
| C | 0.240007  | -0.642704 | 1.048593  |
| N | 1.112467  | -1.040710 | -0.072820 |
| C | 0.757321  | -2.314512 | -0.701650 |
| C | -3.943202 | 0.010366  | 0.112709  |
| C | -2.962687 | 0.367031  | -0.822449 |

|   |           |           |           |
|---|-----------|-----------|-----------|
| C | -1.612802 | 0.144842  | -0.527704 |
| C | -1.214794 | -0.437818 | 0.680267  |
| C | -2.212860 | -0.800551 | 1.600410  |
| C | -3.558264 | -0.576328 | 1.329444  |
| O | -5.285155 | 0.186080  | -0.068087 |
| C | -5.739064 | 0.779368  | -1.288552 |
| H | 3.232884  | -2.465139 | -0.740646 |
| H | 4.316268  | 2.256977  | 0.408529  |
| H | 0.664957  | 1.656450  | -0.105356 |
| H | 0.317973  | -1.439087 | 1.802410  |
| H | 0.668910  | 0.252079  | 1.504736  |
| H | 1.133803  | -3.159812 | -0.111499 |
| H | -0.328497 | -2.385308 | -0.750425 |
| H | 1.167334  | -2.360728 | -1.710288 |
| H | 6.113232  | 0.653036  | -0.108522 |
| H | 5.574506  | -1.704456 | -0.783469 |
| H | -3.229101 | 0.813792  | -1.772464 |
| H | -0.869294 | 0.421772  | -1.269420 |
| H | -1.934346 | -1.264892 | 2.542912  |
| H | -4.324834 | -0.856915 | 2.044797  |
| H | -6.825302 | 0.821038  | -1.210502 |
| H | -5.457034 | 0.168352  | -2.153123 |
| H | -5.340857 | 1.793189  | -1.406295 |

**1k (C)** $\Delta G = -824.923872$  hartree

|   |           |           |           |
|---|-----------|-----------|-----------|
| C | 2.541113  | 0.605334  | -0.080563 |
| C | 3.691875  | 1.336457  | -0.405407 |
| C | 4.897511  | 0.638796  | -0.561938 |
| C | 4.970163  | -0.749414 | -0.391816 |
| C | 3.813193  | -1.470936 | -0.055899 |
| C | 2.614117  | -0.789029 | 0.105455  |
| C | 1.232138  | -1.306433 | 0.409351  |
| O | 0.720114  | -1.931260 | -0.778755 |
| C | 0.488169  | 0.013571  | 0.809455  |
| N | 1.235542  | 1.068760  | 0.093125  |
| C | 1.004617  | 2.447033  | 0.500787  |
| C | -3.791924 | -0.070235 | 0.114311  |
| C | -2.923873 | 0.265704  | -0.933509 |
| C | -1.543872 | 0.302901  | -0.703051 |
| C | -1.003232 | 0.018866  | 0.556579  |
| C | -1.891815 | -0.305992 | 1.596281  |
| C | -3.266254 | -0.355828 | 1.384513  |
| O | -5.152580 | -0.138520 | 0.000734  |
| C | -5.747212 | 0.140729  | -1.269815 |
| H | 1.198249  | -2.023442 | 1.237462  |
| H | -0.208856 | -2.161617 | -0.625042 |
| H | 0.655471  | 0.134867  | 1.894139  |
| H | 3.662476  | 2.413167  | -0.535473 |
| H | 3.856712  | -2.547782 | 0.085312  |
| H | 1.459535  | 3.132655  | -0.218239 |
| H | -0.069736 | 2.641585  | 0.515813  |
| H | 1.416127  | 2.660831  | 1.501235  |
| H | 5.918721  | -1.263801 | -0.510654 |
| H | 5.796874  | 1.194826  | -0.812745 |

|   |           |           |           |
|---|-----------|-----------|-----------|
| H | -3.302013 | 0.498204  | -1.921708 |
| H | -0.879043 | 0.570215  | -1.518291 |
| H | -1.502305 | -0.519706 | 2.588701  |
| H | -3.946968 | -0.605492 | 2.192425  |
| H | -6.821336 | 0.024858  | -1.125555 |
| H | -5.401726 | -0.566742 | -2.031783 |
| H | -5.529526 | 1.165153  | -1.591703 |

## 2k

**$\Delta G = -711.602081$  hartree**

|   |           |           |           |
|---|-----------|-----------|-----------|
| C | 2.346869  | 0.330650  | -0.012353 |
| C | 2.855072  | -0.073723 | 1.244079  |
| C | 3.655295  | -1.213859 | 1.367064  |
| C | 3.968312  | -1.999027 | 0.256152  |
| C | 3.464032  | -1.614236 | -0.992706 |
| C | 2.672149  | -0.476399 | -1.130698 |
| C | 0.525391  | 1.593509  | -1.157823 |
| N | 1.604925  | 1.511406  | -0.155006 |
| C | 1.401051  | 2.348855  | 1.020579  |
| C | -3.228106 | -0.190712 | 0.126806  |
| C | -2.246530 | -0.984068 | -0.481895 |
| C | -1.047414 | -0.395989 | -0.902116 |
| C | -0.794712 | 0.970647  | -0.727936 |
| C | -1.798688 | 1.747877  | -0.124442 |
| C | -2.998506 | 1.183121  | 0.300003  |
| O | -4.434195 | -0.657488 | 0.573988  |
| C | -4.728453 | -2.048059 | 0.418083  |
| H | 2.623992  | 0.494135  | 2.136631  |
| H | 3.694325  | -2.202526 | -1.877134 |
| H | 0.373003  | 2.655811  | -1.374184 |
| H | 0.867370  | 1.136131  | -2.086612 |
| H | 2.360104  | 2.568992  | 1.497371  |
| H | 0.961038  | 3.296628  | 0.701546  |
| H | 0.734123  | 1.899518  | 1.773008  |
| H | 4.585992  | -2.886062 | 0.356636  |
| H | 4.025768  | -1.489318 | 2.351093  |
| H | -2.400955 | -2.044706 | -0.639757 |
| H | -0.300946 | -1.024798 | -1.379027 |
| H | -1.643802 | 2.815419  | 0.010957  |
| H | -3.769592 | 1.791555  | 0.762668  |
| H | -5.722468 | -2.189791 | 0.842369  |
| H | -4.007116 | -2.668819 | 0.961219  |
| H | -4.738194 | -2.334531 | -0.639549 |
| H | 2.321876  | -0.209102 | -2.120869 |

## 1l (O-State)

**$\Delta G = -802.673725$  hartree**

|   |           |           |           |
|---|-----------|-----------|-----------|
| C | -1.925548 | 0.104546  | 0.518292  |
| C | -1.989329 | 1.314315  | 1.248956  |
| C | -2.798967 | 2.372112  | 0.845612  |
| C | -3.591456 | 2.276319  | -0.305830 |
| C | -3.591343 | 1.077567  | -1.004432 |
| C | -2.808694 | -0.029911 | -0.606755 |
| C | -3.147508 | -1.279748 | -1.296975 |

|   |           |           |           |
|---|-----------|-----------|-----------|
| O | -2.754815 | -2.417523 | -1.044033 |
| C | -0.162590 | -1.559114 | -0.043188 |
| N | -1.065360 | -0.911693 | 0.922906  |
| C | -0.560314 | -0.904956 | 2.294775  |
| C | 3.729916  | 0.329781  | -0.298339 |
| C | 2.588191  | 1.003059  | -0.772987 |
| C | 1.342945  | 0.388641  | -0.687396 |
| C | 1.205546  | -0.894254 | -0.130500 |
| C | 2.351574  | -1.552421 | 0.337455  |
| C | 3.608527  | -0.954997 | 0.257525  |
| C | 5.017290  | 0.954359  | -0.385514 |
| N | 6.063282  | 1.462542  | -0.455834 |
| H | -1.359902 | 1.445146  | 2.120349  |
| H | -4.241649 | 0.957995  | -1.867576 |
| H | -3.889698 | -1.135339 | -2.107125 |
| H | -0.041717 | -2.607020 | 0.248613  |
| H | -0.631153 | -1.556805 | -1.023914 |
| H | -1.377323 | -0.701272 | 2.990142  |
| H | -0.163808 | -1.899376 | 2.516848  |
| H | 0.242417  | -0.173811 | 2.466926  |
| H | -4.206674 | 3.108748  | -0.630241 |
| H | -2.791299 | 3.290566  | 1.425821  |
| H | 2.684155  | 1.992145  | -1.207882 |
| H | 0.469050  | 0.911803  | -1.063123 |
| H | 2.262925  | -2.545586 | 0.768198  |
| H | 4.488314  | -1.474743 | 0.621522  |

## 1l (H-State)

**$\Delta G = -802.67708$  hartree**

|   |           |           |           |
|---|-----------|-----------|-----------|
| C | -1.804126 | 0.022550  | 0.655848  |
| C | -1.646019 | 1.203506  | 1.407854  |
| C | -2.371221 | 2.352777  | 1.096136  |
| C | -3.273306 | 2.367416  | 0.022979  |
| C | -3.471790 | 1.199574  | -0.703475 |
| C | -2.777542 | 0.017253  | -0.384663 |
| C | -3.189619 | -1.238179 | -1.032451 |
| O | -3.897057 | -1.309720 | -2.036223 |
| C | -0.165697 | -1.668686 | -0.134505 |
| N | -1.049112 | -1.135269 | 0.927288  |
| C | -0.506182 | -1.290789 | 2.277120  |
| C | 3.689875  | 0.293723  | -0.363614 |
| C | 2.551037  | 0.913328  | -0.910991 |
| C | 1.318207  | 0.271678  | -0.837760 |
| C | 1.192107  | -0.985097 | -0.222451 |
| C | 2.337000  | -1.592114 | 0.314076  |
| C | 3.580459  | -0.966260 | 0.249468  |
| C | 4.964543  | 0.945971  | -0.437575 |
| N | 5.999997  | 1.476457  | -0.496703 |
| H | -0.927667 | 1.235951  | 2.218398  |
| H | -4.202507 | 1.161454  | -1.505455 |
| H | -2.861297 | -2.162945 | -0.526273 |
| H | -0.025957 | -2.737734 | 0.055378  |
| H | -0.673256 | -1.572649 | -1.095051 |
| H | -1.283803 | -1.066428 | 3.010422  |
| H | -0.203393 | -2.333573 | 2.408791  |

|   |           |           |           |
|---|-----------|-----------|-----------|
| H | 0.366916  | -0.655342 | 2.483792  |
| H | -3.823959 | 3.269955  | -0.221567 |
| H | -2.214992 | 3.252055  | 1.685218  |
| H | 2.639043  | 1.881492  | -1.392088 |
| H | 0.446261  | 0.751396  | -1.271509 |
| H | 2.258656  | -2.568270 | 0.783951  |
| H | 4.459858  | -1.445818 | 0.665715  |

### II (A, O-State)

$\Delta G = -802.591637$  hartree

|   |           |           |           |
|---|-----------|-----------|-----------|
| C | -2.383406 | -0.309813 | 0.134172  |
| C | -3.095880 | -1.499391 | 0.036403  |
| C | -4.472567 | -1.473744 | -0.239257 |
| C | -5.119968 | -0.233217 | -0.414970 |
| C | -4.419937 | 0.959734  | -0.317972 |
| C | -3.021449 | 0.959179  | -0.037900 |
| C | -2.211970 | 2.109141  | 0.090156  |
| O | -0.935343 | 2.023787  | 0.352680  |
| C | -0.096499 | -0.727248 | -0.686383 |
| N | -0.974115 | -0.288305 | 0.417035  |
| C | -0.568516 | -0.590509 | 1.787553  |
| C | 4.126253  | -0.010920 | -0.133337 |
| C | 3.249801  | 1.074796  | -0.318391 |
| C | 1.888423  | 0.841065  | -0.486433 |
| C | 1.379779  | -0.467715 | -0.467382 |
| C | 2.262055  | -1.541595 | -0.284469 |
| C | 3.628760  | -1.324572 | -0.117829 |
| C | 5.530724  | 0.224050  | 0.037720  |
| N | 6.671208  | 0.415167  | 0.177197  |
| H | -2.585495 | -2.448375 | 0.176572  |
| H | -4.931466 | 1.908657  | -0.454576 |
| H | -2.636928 | 3.111200  | -0.022640 |
| H | -0.259521 | -1.803138 | -0.844469 |
| H | -0.446264 | -0.209765 | -1.583414 |
| H | -0.599203 | -1.674837 | 1.966800  |
| H | 0.446322  | -0.231004 | 1.961686  |
| H | -1.255334 | -0.095046 | 2.473470  |
| H | -6.184921 | -0.210427 | -0.629875 |
| H | -5.027783 | -2.402727 | -0.315576 |
| H | 3.638336  | 2.087388  | -0.333011 |
| H | 1.206021  | 1.673725  | -0.616634 |
| H | 1.881188  | -2.558387 | -0.272536 |
| H | 4.304525  | -2.161045 | 0.023058  |

### II (A, H-State)

$\Delta G = -802.596015$  hartree

|   |          |           |           |
|---|----------|-----------|-----------|
| C | 2.269588 | -0.567301 | -0.118103 |
| C | 3.341013 | -1.454749 | -0.374364 |
| C | 4.661198 | -1.025512 | -0.359819 |
| C | 4.932588 | 0.341081  | -0.056258 |
| C | 3.913457 | 1.252502  | 0.152772  |
| C | 2.540157 | 0.884973  | 0.035810  |
| C | 1.545954 | 1.913868  | -0.055458 |
| O | 1.808580 | 3.150823  | 0.104408  |

|   |           |           |           |
|---|-----------|-----------|-----------|
| C | 0.065251  | -0.582854 | 1.026006  |
| N | 0.979638  | -1.057633 | -0.027182 |
| C | 0.661603  | -2.389476 | -0.548271 |
| C | -4.041832 | 0.111542  | -0.120652 |
| C | -3.022850 | 0.277419  | -1.074292 |
| C | -1.697818 | 0.038820  | -0.717607 |
| C | -1.368556 | -0.372929 | 0.582113  |
| C | -2.394936 | -0.546044 | 1.523074  |
| C | -3.722575 | -0.302569 | 1.185084  |
| C | -5.407587 | 0.359418  | -0.480068 |
| N | -6.517361 | 0.560122  | -0.771277 |
| H | 3.135751  | -2.510604 | -0.501352 |
| H | 4.137828  | 2.299489  | 0.319939  |
| H | 0.514606  | 1.622342  | -0.289292 |
| H | 0.093058  | -1.325992 | 1.834728  |
| H | 0.472406  | 0.340875  | 1.443614  |
| H | 1.018246  | -3.171858 | 0.133612  |
| H | -0.420711 | -2.480114 | -0.636761 |
| H | 1.113455  | -2.524216 | -1.530581 |
| H | 5.964308  | 0.679453  | -0.007553 |
| H | 5.470342  | -1.728938 | -0.516867 |
| H | -3.268389 | 0.591794  | -2.082768 |
| H | -0.919585 | 0.166284  | -1.463059 |
| H | -2.155483 | -0.874122 | 2.530281  |
| H | -4.508326 | -0.437527 | 1.920211  |

### II (C)

$\Delta G = -802.674829$  hartree

|   |           |           |           |
|---|-----------|-----------|-----------|
| C | 2.408195  | 0.594588  | -0.058912 |
| C | 3.578749  | 1.302838  | -0.361066 |
| C | 4.776072  | 0.583440  | -0.474242 |
| C | 4.820185  | -0.803675 | -0.284872 |
| C | 3.643093  | -1.501630 | 0.027265  |
| C | 2.452048  | -0.796594 | 0.147243  |
| C | 1.056016  | -1.292923 | 0.421397  |
| O | 0.570680  | -1.938851 | -0.764476 |
| C | 0.320148  | 0.050408  | 0.772271  |
| N | 1.104463  | 1.083772  | 0.071378  |
| C | 0.889528  | 2.468405  | 0.471020  |
| C | -3.902371 | -0.011256 | -0.137720 |
| C | -2.980671 | 0.362950  | -1.132505 |
| C | -1.620923 | 0.395218  | -0.835943 |
| C | -1.156701 | 0.064161  | 0.446444  |
| C | -2.086781 | -0.300042 | 1.432410  |
| C | -3.449884 | -0.344826 | 1.151164  |
| C | -5.304283 | -0.045884 | -0.435888 |
| N | -6.443360 | -0.075307 | -0.678433 |
| H | 0.990794  | -1.987642 | 1.265292  |
| H | -0.296886 | -2.325942 | -0.575710 |
| H | 0.437194  | 0.185637  | 1.861027  |
| H | 3.570872  | 2.377804  | -0.506698 |
| H | 3.663702  | -2.577092 | 0.182492  |
| H | 1.388339  | 3.141599  | -0.229866 |
| H | -0.179191 | 2.691327  | 0.443117  |
| H | 1.266223  | 2.671876  | 1.486740  |

|   |           |           |           |
|---|-----------|-----------|-----------|
| H | 5.762788  | -1.335094 | -0.371122 |
| H | 5.691275  | 1.120975  | -0.706981 |
| H | -3.331181 | 0.623540  | -2.125457 |
| H | -0.908646 | 0.687830  | -1.599383 |
| H | -1.742611 | -0.547618 | 2.432649  |
| H | -4.160353 | -0.626717 | 1.920689  |

## 2I

$\Delta G = -689.357963$  hartree

|   |           |           |           |
|---|-----------|-----------|-----------|
| C | -2.275635 | 0.231292  | 0.005967  |
| C | -3.501673 | 0.279122  | -0.701637 |
| C | -4.397734 | -0.790558 | -0.654849 |
| C | -4.117745 | -1.938513 | 0.092293  |
| C | -2.908229 | -1.996982 | 0.793093  |
| C | -1.998186 | -0.940682 | 0.752927  |
| C | -0.300928 | 1.397238  | 0.928693  |
| N | -1.374379 | 1.288856  | -0.044367 |
| C | -1.667920 | 2.460584  | -0.860646 |
| C | 3.511060  | -0.345481 | -0.173789 |
| C | 2.447719  | -0.366353 | -1.092260 |
| C | 1.217987  | 0.187060  | -0.738496 |
| C | 1.027135  | 0.765844  | 0.521611  |
| C | 2.096448  | 0.780384  | 1.432627  |
| C | 3.329945  | 0.233112  | 1.097365  |
| C | 4.778258  | -0.912839 | -0.528444 |
| N | 5.809084  | -1.373947 | -0.815847 |
| H | -3.765536 | 1.154277  | -1.282598 |
| H | -2.659077 | -2.879828 | 1.375975  |
| H | -0.125875 | 2.460330  | 1.128064  |
| H | -0.618091 | 0.969733  | 1.887925  |
| H | -2.519623 | 3.040602  | -0.474351 |
| H | -0.791170 | 3.109159  | -0.879189 |
| H | -1.888155 | 2.173289  | -1.894056 |
| H | -4.820021 | -2.765553 | 0.125643  |
| H | -5.330176 | -0.715619 | -1.208290 |
| H | 2.586029  | -0.813120 | -2.071165 |
| H | 0.395182  | 0.169627  | -1.445351 |
| H | 1.962589  | 1.224998  | 2.415337  |
| H | 4.149817  | 0.249171  | 1.807537  |
| H | -1.061841 | -1.040789 | 1.289285  |

## 1m (O-State)

$\Delta G = -749.712748$  hartree

|   |           |           |           |
|---|-----------|-----------|-----------|
| C | -1.371055 | 0.050506  | 0.276368  |
| C | -1.702514 | 1.030704  | 1.244118  |
| C | -2.724156 | 1.949733  | 1.033834  |
| C | -3.481297 | 1.935317  | -0.147213 |
| C | -3.223353 | 0.940732  | -1.078012 |
| C | -2.216475 | -0.033092 | -0.882953 |
| C | -2.288061 | -1.165012 | -1.812762 |
| O | -1.678184 | -2.232365 | -1.759817 |
| C | 0.682027  | -1.020381 | -0.618920 |
| N | -0.286551 | -0.793041 | 0.467495  |
| C | 0.226074  | -1.047771 | 1.822791  |

|   |           |           |           |
|---|-----------|-----------|-----------|
| C | -0.774021 | -1.786868 | 2.715147  |
| C | 4.363567  | 1.250288  | -0.236726 |
| C | 3.132805  | 1.913426  | -0.318289 |
| C | 1.947987  | 1.183021  | -0.432251 |
| C | 1.970289  | -0.220973 | -0.463796 |
| C | 3.207196  | -0.873918 | -0.380138 |
| C | 4.397924  | -0.145988 | -0.269713 |
| H | -1.117423 | 1.105452  | 2.152063  |
| H | -3.835589 | 0.868694  | -1.973886 |
| H | -3.039044 | -1.015422 | -2.614471 |
| H | 0.916614  | -2.088334 | -0.673851 |
| H | 0.209863  | -0.754356 | -1.562283 |
| H | 1.115835  | -1.669693 | 1.700759  |
| H | -0.323046 | -1.974550 | 3.695232  |
| H | -1.046905 | -2.749099 | 2.270460  |
| H | -1.690786 | -1.211768 | 2.872906  |
| H | 0.570879  | -0.123737 | 2.308650  |
| H | -4.264181 | 2.666991  | -0.316187 |
| H | -2.916406 | 2.703226  | 1.792691  |
| H | 5.285098  | 1.818493  | -0.149099 |
| H | 3.097527  | 2.999066  | -0.297280 |
| H | 0.998767  | 1.707863  | -0.499205 |
| H | 3.241250  | -1.960583 | -0.402896 |
| H | 5.347255  | -0.670375 | -0.206437 |

## 1m (H-State)

$\Delta G = -749.714847$  hartree

|   |           |           |           |
|---|-----------|-----------|-----------|
| C | -1.192737 | 0.229017  | -0.351217 |
| C | -1.171938 | -0.203070 | -1.692345 |
| C | -2.056609 | -1.180413 | -2.144501 |
| C | -2.990633 | -1.765471 | -1.276979 |
| C | -3.051799 | -1.325230 | 0.039135  |
| C | -2.190653 | -0.314661 | 0.507858  |
| C | -2.432955 | 0.257320  | 1.841733  |
| O | -3.157661 | -0.246511 | 2.699220  |
| C | 0.662683  | 0.717391  | 1.212105  |
| N | -0.270985 | 1.171555  | 0.150681  |
| C | 0.316730  | 2.145327  | -0.783570 |
| C | -0.722104 | 3.090469  | -1.389337 |
| C | 4.219917  | -1.302042 | -0.243679 |
| C | 2.996771  | -1.980220 | -0.190570 |
| C | 1.854140  | -1.330472 | 0.283105  |
| C | 1.911621  | 0.007638  | 0.707506  |
| C | 3.144779  | 0.673475  | 0.656272  |
| C | 4.291989  | 0.026674  | 0.184130  |
| H | -0.439290 | 0.202243  | -2.380040 |
| H | -3.794204 | -1.722539 | 0.724472  |
| H | -1.947622 | 1.229696  | 2.035335  |
| H | 0.951441  | 1.597877  | 1.795336  |
| H | 0.118724  | 0.050383  | 1.883195  |
| H | 1.029381  | 2.734900  | -0.199767 |
| H | -0.221914 | 3.819256  | -2.035557 |
| H | -1.253617 | 3.635022  | -0.602346 |
| H | -1.461140 | 2.558931  | -1.995612 |
| H | 0.905104  | 1.660630  | -1.577527 |

|   |           |           |           |
|---|-----------|-----------|-----------|
| H | -3.667453 | -2.534923 | -1.634193 |
| H | -2.003239 | -1.503205 | -3.180489 |
| H | 5.109166  | -1.807871 | -0.608583 |
| H | 2.934755  | -3.016426 | -0.510932 |
| H | 0.912484  | -1.870696 | 0.330945  |
| H | 3.211863  | 1.704591  | 0.994790  |
| H | 5.238527  | 0.558939  | 0.154587  |

### 1m (A, O-State)

$\Delta G = -749.628054$  hartree

|   |           |           |           |
|---|-----------|-----------|-----------|
| C | -1.204002 | 0.197074  | 0.197902  |
| C | -0.840465 | 1.205358  | 1.084338  |
| C | -1.623035 | 2.366389  | 1.191018  |
| C | -2.771334 | 2.504257  | 0.383641  |
| C | -3.152625 | 1.501396  | -0.494764 |
| C | -2.392817 | 0.298907  | -0.597414 |
| C | -2.738299 | -0.817551 | -1.393237 |
| O | -2.043070 | -1.919525 | -1.375603 |
| C | 0.615433  | -0.968712 | -1.050107 |
| N | -0.416312 | -0.984261 | 0.012983  |
| C | -0.207405 | -1.903491 | 1.138795  |
| C | -1.486619 | -2.242124 | 1.898425  |
| C | 4.314078  | 0.955567  | 0.134515  |
| C | 3.305309  | 1.694921  | -0.491215 |
| C | 2.113858  | 1.071627  | -0.873070 |
| C | 1.914267  | -0.296660 | -0.634735 |
| C | 2.937234  | -1.031976 | -0.016315 |
| C | 4.128782  | -0.410937 | 0.368466  |
| H | 0.059709  | 1.098486  | 1.682157  |
| H | -4.051889 | 1.611143  | -1.095050 |
| H | -3.608257 | -0.775583 | -2.057329 |
| H | 0.794313  | -2.009050 | -1.332854 |
| H | 0.177225  | -0.453195 | -1.906143 |
| H | 0.241395  | -2.810294 | 0.723561  |
| H | -1.245655 | -2.955230 | 2.692413  |
| H | -2.221923 | -2.694613 | 1.228831  |
| H | -1.929333 | -1.356733 | 2.361921  |
| H | 0.533581  | -1.460492 | 1.821413  |
| H | -3.374261 | 3.405302  | 0.458848  |
| H | -1.335936 | 3.151741  | 1.882449  |
| H | 5.241028  | 1.438464  | 0.429669  |
| H | 3.446760  | 2.753962  | -0.686472 |
| H | 1.336789  | 1.649522  | -1.365481 |
| H | 2.808439  | -2.097280 | 0.155911  |
| H | 4.912598  | -0.994389 | 0.842643  |

### 1m (A, H-State)

$\Delta G = -749.633281$  hartree

|   |          |           |           |
|---|----------|-----------|-----------|
| C | 1.646629 | 0.395346  | 0.121636  |
| C | 2.663733 | 1.352701  | 0.351460  |
| C | 4.011390 | 1.030576  | 0.247797  |
| C | 4.367854 | -0.295188 | -0.124728 |
| C | 3.408906 | -1.277416 | -0.303755 |
| C | 2.021414 | -1.025816 | -0.089649 |

|   |           |           |           |
|---|-----------|-----------|-----------|
| C | 1.126309  | -2.139125 | 0.043164  |
| O | 1.481907  | -3.347257 | -0.159554 |
| C | -0.618359 | 0.234371  | -0.891760 |
| N | 0.319753  | 0.792621  | 0.100316  |
| C | -0.105568 | 2.057360  | 0.730458  |
| C | -0.150537 | 3.264004  | -0.219851 |
| C | -4.634089 | -0.658581 | 0.457973  |
| C | -3.551305 | -0.885180 | 1.313366  |
| C | -2.251277 | -0.583429 | 0.898792  |
| C | -2.016698 | -0.042977 | -0.374784 |
| C | -3.109417 | 0.190268  | -1.222104 |
| C | -4.409102 | -0.120329 | -0.812657 |
| H | 2.392869  | 2.385301  | 0.530583  |
| H | 3.702736  | -2.298284 | -0.518691 |
| H | 0.092893  | -1.941649 | 0.352333  |
| H | -0.671101 | 0.947516  | -1.724054 |
| H | -0.168282 | -0.671369 | -1.303131 |
| H | -1.105619 | 1.880303  | 1.133772  |
| H | -0.436983 | 4.147425  | 0.358316  |
| H | -0.892701 | 3.129484  | -1.010868 |
| H | 0.819702  | 3.456366  | -0.684794 |
| H | 0.554206  | 2.244760  | 1.577388  |
| H | 5.417229  | -0.549818 | -0.249225 |
| H | 4.769962  | 1.791214  | 0.390221  |
| H | -5.643648 | -0.895427 | 0.780377  |
| H | -3.716057 | -1.298186 | 2.304202  |
| H | -1.421220 | -0.758388 | 1.577024  |
| H | -2.943554 | 0.615844  | -2.208506 |
| H | -5.243264 | 0.065106  | -1.482878 |

### 1m (C)

$\Delta G = -749.712601$  hartree

|   |           |           |           |
|---|-----------|-----------|-----------|
| C | -1.804629 | 0.360207  | -0.094353 |
| C | -2.994060 | 1.094381  | 0.019528  |
| C | -4.200747 | 0.389566  | 0.130770  |
| C | -4.238045 | -1.010064 | 0.125416  |
| C | -3.042245 | -1.736518 | 0.002969  |
| C | -1.842030 | -1.048486 | -0.113829 |
| C | -0.431083 | -1.566023 | -0.216661 |
| O | -0.030070 | -2.022542 | 1.085047  |
| C | 0.329180  | -0.288252 | -0.712566 |
| N | -0.497434 | 0.830611  | -0.211646 |
| C | -0.231124 | 2.182967  | -0.711688 |
| C | -0.197104 | 3.243660  | 0.392889  |
| C | 4.519219  | -0.191939 | 0.380125  |
| C | 3.550134  | 0.224131  | 1.299289  |
| C | 2.196571  | 0.208905  | 0.951184  |
| C | 1.790603  | -0.219273 | -0.322633 |
| C | 2.771496  | -0.628016 | -1.239194 |
| C | 4.125668  | -0.619355 | -0.891646 |
| H | -0.308355 | -2.380839 | -0.938889 |
| H | 0.901773  | -2.285577 | 1.043809  |
| H | 0.267548  | -0.312579 | -1.813796 |
| H | -2.994340 | 2.178770  | 0.023970  |
| H | -3.056093 | -2.823296 | -0.010726 |

|   |           |           |           |
|---|-----------|-----------|-----------|
| H | 0.739335  | 2.160539  | -1.215578 |
| H | -0.006140 | 4.230657  | -0.042462 |
| H | 0.596696  | 3.024771  | 1.113588  |
| H | -1.144323 | 3.293784  | 0.938136  |
| H | -0.979006 | 2.451739  | -1.473796 |
| H | -5.187138 | -1.530426 | 0.208356  |
| H | -5.128227 | 0.949204  | 0.217928  |
| H | 5.571008  | -0.177701 | 0.650740  |
| H | 3.847281  | 0.561977  | 2.288063  |
| H | 1.447503  | 0.537868  | 1.663831  |
| H | 2.473896  | -0.950849 | -2.233983 |
| H | 4.870354  | -0.937332 | -1.615644 |

## 2m

**$\Delta G = -636.394538$  hartree**

|   |           |           |           |
|---|-----------|-----------|-----------|
| C | 1.517856  | -0.048112 | -0.088811 |
| C | 2.771346  | 0.076532  | 0.562568  |
| C | 3.676592  | -0.984787 | 0.590806  |
| C | 3.385095  | -2.205546 | -0.026487 |
| C | 2.152414  | -2.341124 | -0.673180 |
| C | 1.231803  | -1.293220 | -0.704844 |
| C | -0.578950 | 0.935798  | -0.963345 |
| N | 0.601862  | 0.995272  | -0.116109 |
| C | 0.838468  | 2.252098  | 0.596916  |
| C | 1.653726  | 3.285193  | -0.193646 |
| C | -4.121479 | -0.940109 | 0.715101  |
| C | -2.999321 | -0.731239 | 1.521043  |
| C | -1.848098 | -0.138343 | 0.988550  |
| C | -1.803632 | 0.254143  | -0.353831 |
| C | -2.934383 | 0.038547  | -1.157362 |
| C | -4.084744 | -0.552529 | -0.629830 |
| H | 3.053322  | 1.007661  | 1.038307  |
| H | 1.891152  | -3.279608 | -1.155469 |
| H | -0.850351 | 1.965399  | -1.223021 |
| H | -0.332447 | 0.451972  | -1.916082 |
| H | -0.140723 | 2.673805  | 0.846442  |
| H | 1.775112  | 4.200382  | 0.396502  |
| H | 1.147562  | 3.550089  | -1.128051 |
| H | 2.648842  | 2.904651  | -0.443143 |
| H | 1.323122  | 2.034911  | 1.553814  |
| H | 4.095809  | -3.025687 | -0.003207 |
| H | 4.627573  | -0.845127 | 1.098490  |
| H | -5.014345 | -1.401309 | 1.127250  |
| H | -3.015507 | -1.031204 | 2.565216  |
| H | -0.976470 | 0.016365  | 1.617103  |
| H | -2.913888 | 0.335298  | -2.203956 |
| H | -4.950169 | -0.712484 | -1.266932 |
| H | 0.278217  | -1.455822 | -1.192391 |

## 1n (O-State)

**$\Delta G = -828.296420$  hartree**

|   |           |           |           |
|---|-----------|-----------|-----------|
| C | -1.156037 | -0.690988 | -0.154023 |
| C | -1.568998 | -0.466793 | -1.491156 |
| C | -2.390185 | -1.364442 | -2.163271 |

|   |           |           |           |
|---|-----------|-----------|-----------|
| C | -2.858436 | -2.529481 | -1.536848 |
| C | -2.529789 | -2.733140 | -0.205731 |
| C | -1.726353 | -1.824378 | 0.521930  |
| C | -1.739738 | -2.041718 | 1.971991  |
| O | -1.302800 | -1.304725 | 2.855372  |
| C | 0.885039  | -0.370734 | 1.222650  |
| N | -0.255711 | 0.165905  | 0.460535  |
| C | -0.086876 | 1.542177  | -0.028936 |
| C | -1.331751 | 2.415869  | 0.172444  |
| C | -1.123747 | 3.848481  | -0.336547 |
| C | -2.350742 | 4.742387  | -0.122570 |
| C | 4.656472  | -0.305570 | -0.928478 |
| C | 3.569311  | -1.028882 | -1.434590 |
| C | 2.353844  | -1.042009 | -0.747028 |
| C | 2.201116  | -0.331863 | 0.455162  |
| C | 3.294974  | 0.389553  | 0.951340  |
| C | 4.516699  | 0.402545  | 0.267730  |
| H | -1.200083 | 0.398390  | -2.027253 |
| H | -2.930860 | -3.594751 | 0.322748  |
| H | -2.270210 | -2.970865 | 2.262306  |
| H | 0.987219  | 0.188224  | 2.158408  |
| H | 0.663668  | -1.400171 | 1.495098  |
| H | 0.738875  | 1.973808  | 0.542679  |
| H | -3.227094 | 4.342368  | -0.646243 |
| H | -2.173036 | 5.756898  | -0.495390 |
| H | -2.604404 | 4.816912  | 0.941495  |
| H | -0.874080 | 3.821177  | -1.406020 |
| H | -0.256014 | 4.292495  | 0.170419  |
| H | -1.577380 | 2.432620  | 1.242236  |
| H | -2.193620 | 1.971044  | -0.339689 |
| H | 0.234614  | 1.564660  | -1.080772 |
| H | -3.482141 | -3.237804 | -2.071683 |
| H | -2.649304 | -1.163620 | -3.199201 |
| H | 5.602295  | -0.296477 | -1.462429 |
| H | 3.670792  | -1.585689 | -2.361941 |
| H | 1.517842  | -1.610555 | -1.145678 |
| H | 3.192808  | 0.944572  | 1.880897  |
| H | 5.353671  | 0.967149  | 0.668877  |

## 1n (H-State)

**$\Delta G = -828.298143$  hartree**

|   |           |           |           |
|---|-----------|-----------|-----------|
| C | 0.910364  | -0.675381 | 0.178031  |
| C | 0.960181  | -0.485120 | 1.573298  |
| C | 1.474111  | -1.471024 | 2.413537  |
| C | 1.952973  | -2.683287 | 1.895222  |
| C | 1.947016  | -2.873885 | 0.519232  |
| C | 1.463612  | -1.877087 | -0.349876 |
| C | 1.668544  | -2.040602 | -1.797772 |
| O | 1.991377  | -3.094111 | -2.345733 |
| C | -0.871818 | -0.128066 | -1.448389 |
| N | 0.341483  | 0.278009  | -0.693290 |
| C | 0.345164  | 1.691468  | -0.284076 |
| C | 1.756854  | 2.278048  | -0.172306 |
| C | 1.743124  | 3.766893  | 0.200645  |
| C | 3.148874  | 4.371941  | 0.290103  |



|   |           |           |           |
|---|-----------|-----------|-----------|
| C | -4.587856 | 0.191899  | 0.773474  |
| C | -3.742927 | -0.906863 | 0.967146  |
| C | -2.549711 | -1.009574 | 0.247471  |
| C | -2.177861 | -0.016871 | -0.674323 |
| C | -3.036719 | 1.075502  | -0.864414 |
| C | -4.233096 | 1.182298  | -0.147064 |
| H | 0.566434  | 0.425232  | 2.009407  |
| H | 2.354137  | -3.780104 | 0.081446  |
| H | 1.557583  | -1.120464 | -2.397296 |
| H | -0.922088 | 0.495636  | -2.346663 |
| H | -0.740210 | -1.159676 | -1.779577 |
| H | -0.197066 | 2.237008  | -1.062673 |
| H | 3.751333  | 3.861279  | 1.050685  |
| H | 3.108286  | 5.434280  | 0.553911  |
| H | 3.677375  | 4.284735  | -0.666614 |
| H | 1.227878  | 3.897051  | 1.162055  |
| H | 1.153742  | 4.322281  | -0.541813 |
| H | 2.269089  | 2.141385  | -1.133652 |
| H | 2.339379  | 1.724540  | 0.574390  |
| H | -0.215216 | 1.860511  | 0.648904  |
| H | 2.340219  | -3.450756 | 2.557641  |
| H | 1.482980  | -1.299414 | 3.486277  |
| H | -5.517259 | 0.270566  | 1.330073  |
| H | -4.016588 | -1.686383 | 1.672625  |
| H | -1.906506 | -1.872702 | 0.396199  |
| H | -2.773195 | 1.845624  | -1.585376 |
| H | -4.886681 | 2.034461  | -0.310684 |

### In (A, O-State)

$\Delta G = -828.211475$  hartree

|   |           |           |           |
|---|-----------|-----------|-----------|
| C | 0.651273  | 0.965731  | -0.084920 |
| C | 0.216057  | 1.211675  | -1.382781 |
| C | 0.555915  | 2.413050  | -2.025387 |
| C | 1.330340  | 3.370689  | -1.337846 |
| C | 1.780442  | 3.133751  | -0.047842 |
| C | 1.476541  | 1.907488  | 0.613932  |
| C | 1.954749  | 1.531985  | 1.890496  |
| O | 1.707820  | 0.360775  | 2.404186  |
| C | -0.922637 | -0.167714 | 1.483573  |
| N | 0.289716  | -0.219535 | 0.632743  |
| C | 0.694151  | -1.531446 | 0.114547  |
| C | 2.178258  | -1.625351 | -0.246888 |
| C | 2.550240  | -3.028190 | -0.746776 |
| C | 4.034122  | -3.149267 | -1.112169 |
| C | -4.616827 | -0.700940 | -0.719285 |
| C | -4.098623 | 0.581809  | -0.514311 |
| C | -2.908104 | 0.750979  | 0.198136  |
| C | -2.219278 | -0.357678 | 0.713266  |
| C | -2.753072 | -1.639679 | 0.511202  |
| C | -3.943091 | -1.811938 | -0.201458 |
| H | -0.402025 | 0.477792  | -1.891222 |
| H | 2.394170  | 3.871128  | 0.462719  |
| H | 2.544805  | 2.235693  | 2.487636  |
| H | -0.809723 | -0.943927 | 2.244158  |
| H | -0.914980 | 0.802614  | 1.982311  |

|   |           |           |           |
|---|-----------|-----------|-----------|
| H | 0.445978  | -2.266553 | 0.886196  |
| H | 4.304377  | -2.443586 | -1.906472 |
| H | 4.273147  | -4.157991 | -1.465440 |
| H | 4.672797  | -2.937577 | -0.246623 |
| H | 1.937004  | -3.279402 | -1.622787 |
| H | 2.303357  | -3.768760 | 0.025853  |
| H | 2.769893  | -1.370491 | 0.639063  |
| H | 2.418798  | -0.886740 | -1.020162 |
| H | 0.077164  | -1.768046 | -0.766688 |
| H | 1.588400  | 4.304850  | -1.829575 |
| H | 0.212977  | 2.602378  | -3.037202 |
| H | -5.543071 | -0.833168 | -1.270786 |
| H | -4.622257 | 1.450031  | -0.903832 |
| H | -2.514213 | 1.750330  | 0.360679  |
| H | -2.244054 | -2.507505 | 0.922247  |
| H | -4.345850 | -2.810251 | -0.345701 |

### In (A, H-State)

$\Delta G = -828.215780$  hartree

|   |           |           |           |
|---|-----------|-----------|-----------|
| C | -1.739565 | 0.169288  | -0.103922 |
| C | -2.521505 | 1.332393  | -0.298929 |
| C | -3.906280 | 1.312554  | -0.184856 |
| C | -4.543608 | 0.088421  | 0.159243  |
| C | -3.823092 | -1.084443 | 0.304822  |
| C | -2.414754 | -1.138095 | 0.084652  |
| C | -1.785695 | -2.417166 | -0.078158 |
| O | -2.395545 | -3.522584 | 0.103936  |
| C | 0.435945  | -0.488207 | 0.897956  |
| N | -0.356202 | 0.263740  | -0.095127 |
| C | 0.331921  | 1.395881  | -0.738672 |
| C | 0.696347  | 2.557984  | 0.206209  |
| C | 1.337919  | 3.718305  | -0.567546 |
| C | 1.744482  | 4.881512  | 0.344330  |
| C | 4.223899  | -2.120814 | -0.416083 |
| C | 3.114182  | -2.177112 | -1.265450 |
| C | 1.890445  | -1.636981 | -0.861545 |
| C | 1.760717  | -1.026035 | 0.395311  |
| C | 2.880946  | -0.966309 | 1.236436  |
| C | 4.103663  | -1.513575 | 0.837351  |
| H | -2.029364 | 2.283429  | -0.458793 |
| H | -4.332359 | -2.021363 | 0.498714  |
| H | -0.735790 | -2.443155 | -0.394403 |
| H | 0.611287  | 0.184358  | 1.747284  |
| H | -0.193584 | -1.294331 | 1.280727  |
| H | 1.249426  | 0.994353  | -1.178100 |
| H | 0.877347  | 5.287846  | 0.877606  |
| H | 2.192652  | 5.695605  | -0.234909 |
| H | 2.477583  | 4.559896  | 1.092979  |
| H | 0.635690  | 4.079173  | -1.330637 |
| H | 2.220207  | 3.349741  | -1.107325 |
| H | 1.395460  | 2.205233  | 0.973061  |
| H | -0.199719 | 2.909777  | 0.730913  |
| H | -0.294459 | 1.741918  | -1.561492 |
| H | -5.622675 | 0.067306  | 0.288313  |
| H | -4.479633 | 2.224889  | -0.300004 |

|   |          |           |           |
|---|----------|-----------|-----------|
| H | 5.173947 | -2.542611 | -0.730286 |
| H | 3.198743 | -2.642343 | -2.243126 |
| H | 1.039572 | -1.682357 | -1.535220 |
| H | 2.797221 | -0.489554 | 2.209760  |
| H | 4.960421 | -1.458919 | 1.502456  |

### 1n (C)

$\Delta G = -828.297140$  hartree

|   |           |           |           |
|---|-----------|-----------|-----------|
| C | -1.830561 | -0.154271 | -0.125694 |
| C | -2.982363 | 0.641927  | -0.047728 |
| C | -4.220476 | 0.004107  | 0.111501  |
| C | -4.324842 | -1.390108 | 0.187998  |
| C | -3.166202 | -2.179305 | 0.101945  |
| C | -1.935376 | -1.558146 | -0.061956 |
| C | -0.551744 | -2.148592 | -0.139064 |
| O | -0.167566 | -2.552142 | 1.185218  |
| C | 0.267843  | -0.939272 | -0.708039 |
| N | -0.503759 | 0.245721  | -0.276494 |
| C | -0.177940 | 1.550228  | -0.859926 |
| C | -0.058618 | 2.675181  | 0.177635  |
| C | 0.249948  | 4.034570  | -0.462785 |
| C | 0.394605  | 5.161656  | 0.566587  |
| C | 4.458081  | -0.978107 | 0.387580  |
| C | 3.510091  | -0.463017 | 1.278113  |
| C | 2.157383  | -0.433788 | 0.927604  |
| C | 1.731314  | -0.916667 | -0.319825 |
| C | 2.691204  | -1.426434 | -1.207450 |
| C | 4.044422  | -1.461130 | -0.857633 |
| H | -0.472424 | -3.007328 | -0.815022 |
| H | 0.749240  | -2.864861 | 1.156297  |
| H | 0.204338  | -1.025690 | -1.805988 |
| H | -2.929942 | 1.723632  | -0.105031 |
| H | -3.232213 | -3.263098 | 0.152257  |
| H | 0.777400  | 1.448640  | -1.384725 |
| H | -0.526160 | 5.284224  | 1.149200  |
| H | 0.612572  | 6.119014  | 0.080925  |
| H | 1.208161  | 4.950961  | 1.270780  |
| H | -0.546455 | 4.290787  | -1.174922 |
| H | 1.174654  | 3.956464  | -1.051262 |
| H | 0.732970  | 2.412253  | 0.890700  |
| H | -0.987834 | 2.746352  | 0.757145  |
| H | -0.930367 | 1.816921  | -1.619347 |
| H | -5.297013 | -1.858359 | 0.306631  |
| H | -5.119257 | 0.612075  | 0.171441  |
| H | 5.509442  | -0.997630 | 0.659572  |
| H | 3.823227  | -0.082070 | 2.246077  |
| H | 1.424776  | -0.027683 | 1.617106  |
| H | 2.378150  | -1.793751 | -2.181830 |
| H | 4.772975  | -1.856753 | -1.559447 |

### 2n

$\Delta G = -714.977339$  hartree

|   |           |          |           |
|---|-----------|----------|-----------|
| C | -0.627712 | 1.234927 | -0.090202 |
| C | -1.732042 | 1.834315 | 0.567312  |

|   |           |           |           |
|---|-----------|-----------|-----------|
| C | -1.883351 | 3.220810  | 0.602587  |
| C | -0.957384 | 4.069284  | -0.013074 |
| C | 0.135902  | 3.490830  | -0.665645 |
| C | 0.307286  | 2.106704  | -0.704726 |
| C | 0.562825  | -0.747943 | -0.967749 |
| N | -0.457196 | -0.142823 | -0.125085 |
| C | -1.379023 | -1.053965 | 0.555072  |
| C | -2.626403 | -1.426531 | -0.264123 |
| C | -3.556055 | -2.392166 | 0.482244  |
| C | -4.799734 | -2.774348 | -0.328762 |
| C | 4.559723  | -1.078227 | 0.705914  |
| C | 3.494760  | -0.689852 | 1.523168  |
| C | 2.205161  | -0.568839 | 0.991991  |
| C | 1.962798  | -0.833883 | -0.360650 |
| C | 3.038314  | -1.220905 | -1.175277 |
| C | 4.326403  | -1.343786 | -0.648763 |
| H | -2.487079 | 1.221053  | 1.043370  |
| H | 0.878111  | 4.121854  | -1.147917 |
| H | 0.228167  | -1.762614 | -1.210243 |
| H | 0.617814  | -0.222656 | -1.929293 |
| H | -0.819074 | -1.963750 | 0.798630  |
| H | -5.395567 | -1.888359 | -0.578155 |
| H | -5.442943 | -3.463409 | 0.229326  |
| H | -4.522197 | -3.264007 | -1.269772 |
| H | -3.866301 | -1.935564 | 1.432290  |
| H | -2.998462 | -3.301399 | 0.746334  |
| H | -2.307321 | -1.882556 | -1.211265 |
| H | -3.176055 | -0.513974 | -0.527621 |
| H | -1.673678 | -0.618517 | 1.516140  |
| H | -1.083651 | 5.147024  | 0.015440  |
| H | -2.746718 | 3.637767  | 1.114815  |
| H | 5.560865  | -1.170602 | 1.116946  |
| H | 3.665008  | -0.477483 | 2.575050  |
| H | 1.381712  | -0.259993 | 1.628826  |
| H | 2.866860  | -1.426251 | -2.229921 |
| H | 5.147206  | -1.642960 | -1.294711 |
| H | 1.184866  | 1.707615  | -1.198579 |

### 1o (O-State)

$\Delta G = -941.409679$  hartree

|   |           |           |           |
|---|-----------|-----------|-----------|
| C | -1.067929 | -1.085463 | 0.476732  |
| C | -1.492483 | -0.687580 | 1.749631  |
| C | -2.665633 | -1.179520 | 2.331472  |
| C | -3.456713 | -2.097574 | 1.639433  |
| C | -3.054826 | -2.509510 | 0.371703  |
| C | -1.875823 | -2.025131 | -0.231358 |
| C | -1.616202 | -2.584153 | -1.575735 |
| O | -0.673718 | -2.347468 | -2.320659 |
| C | 0.036622  | 0.456849  | -1.102078 |
| N | 0.160511  | -0.504350 | 0.010583  |
| C | 1.297993  | -1.437608 | -0.108006 |
| C | -2.247400 | 4.005269  | -0.104358 |
| C | -2.704361 | 3.130647  | -1.093190 |
| C | -1.968918 | 1.980593  | -1.406015 |
| C | -0.771875 | 1.688380  | -0.739512 |

|   |           |           |           |
|---|-----------|-----------|-----------|
| C | -0.321949 | 2.575929  | 0.251446  |
| C | -1.051009 | 3.723918  | 0.567918  |
| C | 5.148886  | 0.473565  | 0.476342  |
| C | 4.873282  | -0.202923 | -0.714406 |
| C | 3.624771  | -0.808565 | -0.903369 |
| C | 2.638009  | -0.748935 | 0.089572  |
| C | 2.927568  | -0.067603 | 1.282980  |
| C | 4.170304  | 0.538829  | 1.476668  |
| H | -0.874966 | 0.025852  | 2.284381  |
| H | -3.661136 | -3.227021 | -0.175434 |
| H | -2.397395 | -3.299069 | -1.902634 |
| H | 1.058546  | 0.764566  | -1.348816 |
| H | -0.382205 | -0.009169 | -2.004194 |
| H | 1.168188  | -2.192924 | 0.674852  |
| H | 1.297649  | -1.965995 | -1.070466 |
| H | -4.369051 | -2.487373 | 2.079241  |
| H | -2.955831 | -0.843092 | 3.322504  |
| H | -2.814477 | 4.898840  | 0.140571  |
| H | -3.630804 | 3.339450  | -1.620944 |
| H | -2.329342 | 1.304300  | -2.177347 |
| H | 0.605072  | 2.361012  | 0.776264  |
| H | -0.686207 | 4.401900  | 1.334704  |
| H | 6.115764  | 0.945362  | 0.626564  |
| H | 5.624345  | -0.257933 | -1.497488 |
| H | 3.415450  | -1.332333 | -1.833050 |
| H | 2.169970  | -0.012130 | 2.059886  |
| H | 4.378708  | 1.059463  | 2.407367  |

### 1o (H-State)

$\Delta G = -941.411571$  hartree

|   |           |           |           |
|---|-----------|-----------|-----------|
| C | -1.071340 | -0.938538 | 0.506809  |
| C | -1.437684 | -0.403901 | 1.749663  |
| C | -2.615705 | -0.792032 | 2.390637  |
| C | -3.462280 | -1.736557 | 1.797462  |
| C | -3.119469 | -2.277331 | 0.563738  |
| C | -1.937445 | -1.888359 | -0.096809 |
| C | -1.647580 | -2.486453 | -1.417313 |
| O | -2.359920 | -3.321902 | -1.966324 |
| C | 0.084481  | 0.468189  | -1.177226 |
| N | 0.171536  | -0.486889 | -0.058544 |
| C | 1.244696  | -1.487988 | -0.184640 |
| C | -1.885125 | 4.197537  | -0.179212 |
| C | -2.451317 | 3.336052  | -1.121897 |
| C | -1.817716 | 2.127597  | -1.436613 |
| C | -0.615634 | 1.764568  | -0.816550 |
| C | -0.054302 | 2.638698  | 0.128009  |
| C | -0.681824 | 3.844824  | 0.445308  |
| C | 5.221202  | 0.137421  | 0.415566  |
| C | 4.919401  | -0.569061 | -0.751120 |
| C | 3.630337  | -1.079528 | -0.947087 |
| C | 2.630018  | -0.894208 | 0.015928  |
| C | 2.944116  | -0.182687 | 1.184680  |
| C | 4.227781  | 0.329049  | 1.384432  |
| H | -0.774231 | 0.320352  | 2.209243  |
| H | -3.758549 | -3.010721 | 0.082504  |

|   |           |           |           |
|---|-----------|-----------|-----------|
| H | -0.734228 | -2.142306 | -1.926197 |
| H | 1.117010  | 0.689755  | -1.467723 |
| H | -0.405440 | 0.031280  | -2.063393 |
| H | 1.064778  | -2.248193 | 0.582686  |
| H | 1.229894  | -2.009547 | -1.155749 |
| H | -4.376448 | -2.044389 | 2.295240  |
| H | -2.869890 | -0.361245 | 3.354667  |
| H | -2.373277 | 5.136153  | 0.066942  |
| H | -3.383914 | 3.600309  | -1.612403 |
| H | -2.263005 | 1.462079  | -2.172058 |
| H | 0.878667  | 2.367863  | 0.614925  |
| H | -0.232574 | 4.511986  | 1.175756  |
| H | 6.219452  | 0.536509  | 0.570807  |
| H | 5.681261  | -0.720281 | -1.510640 |
| H | 3.400766  | -1.626447 | -1.858540 |
| H | 2.174920  | -0.028749 | 1.936161  |
| H | 4.455746  | 0.875278  | 2.295582  |

### 1o (A, O-State)

$\Delta G = -941.327476$  hartree

|   |           |           |           |
|---|-----------|-----------|-----------|
| C | -0.977578 | -1.284574 | -0.316344 |
| C | -1.607501 | -1.587946 | -1.518308 |
| C | -2.756197 | -2.394566 | -1.529565 |
| C | -3.256141 | -2.903155 | -0.312739 |
| C | -2.634096 | -2.613172 | 0.891720  |
| C | -1.475553 | -1.782050 | 0.929374  |
| C | -0.784971 | -1.405954 | 2.102780  |
| O | 0.249687  | -0.612202 | 2.071559  |
| C | 0.195803  | 0.889814  | -0.752798 |
| N | 0.227498  | -0.503306 | -0.265312 |
| C | 1.464984  | -1.274205 | -0.549234 |
| C | -3.270977 | 3.238910  | 0.333247  |
| C | -3.065211 | 2.859954  | -0.995957 |
| C | -1.952668 | 2.084030  | -1.337667 |
| C | -1.034961 | 1.677755  | -0.359277 |
| C | -1.245046 | 2.069082  | 0.972082  |
| C | -2.357317 | 2.840922  | 1.316042  |
| C | 5.227507  | 0.769137  | 0.082458  |
| C | 4.782001  | 0.496235  | -1.213649 |
| C | 3.558506  | -0.152619 | -1.409981 |
| C | 2.766680  | -0.535603 | -0.317621 |
| C | 3.225877  | -0.264728 | 0.981597  |
| C | 4.445930  | 0.386220  | 1.178770  |
| H | -1.204873 | -1.204646 | -2.451808 |
| H | -3.032015 | -3.007063 | 1.823073  |
| H | -1.099152 | -1.785348 | 3.080469  |
| H | 1.098175  | 1.372777  | -0.369333 |
| H | 0.287777  | 0.872189  | -1.849566 |
| H | 1.409415  | -2.170170 | 0.073581  |
| H | 1.412371  | -1.600635 | -1.597931 |
| H | -4.143923 | -3.529854 | -0.317683 |
| H | -3.247746 | -2.625128 | -2.468956 |
| H | -4.133551 | 3.841870  | 0.601991  |
| H | -3.766743 | 3.166144  | -1.766550 |
| H | -1.798113 | 1.793690  | -2.373558 |

|   |           |           |           |
|---|-----------|-----------|-----------|
| H | -0.541289 | 1.753425  | 1.735574  |
| H | -2.508809 | 3.135990  | 2.350513  |
| H | 6.177455  | 1.272074  | 0.238612  |
| H | 5.383446  | 0.784820  | -2.070748 |
| H | 3.218917  | -0.364827 | -2.420661 |
| H | 2.614618  | -0.556064 | 1.829281  |
| H | 4.789643  | 0.590583  | 2.188831  |

### 1o (A, H-State)

$\Delta G = -941.330100$  hartree

|   |           |           |           |
|---|-----------|-----------|-----------|
| C | 1.764867  | -0.801458 | 0.053990  |
| C | 1.713545  | -1.510994 | 1.276970  |
| C | 2.775185  | -1.500239 | 2.171174  |
| C | 3.932418  | -0.736379 | 1.845323  |
| C | 4.050544  | -0.085631 | 0.629960  |
| C | 3.035908  | -0.166717 | -0.368967 |
| C | 3.352423  | 0.186544  | -1.724069 |
| O | 4.439278  | 0.756643  | -2.063511 |
| C | -0.309235 | -1.842406 | -0.865542 |
| N | 0.626738  | -0.709293 | -0.733576 |
| C | 0.259769  | 0.549699  | -1.409732 |
| C | -4.400971 | -1.368937 | 0.479119  |
| C | -4.122157 | -1.711615 | -0.845993 |
| C | -2.795778 | -1.835265 | -1.272388 |
| C | -1.734189 | -1.622819 | -0.382616 |
| C | -2.024266 | -1.280630 | 0.947149  |
| C | -3.347107 | -1.153197 | 1.374325  |
| C | -1.935050 | 3.421222  | 0.981307  |
| C | -2.496780 | 2.898097  | -0.187162 |
| C | -1.795009 | 1.952216  | -0.940236 |
| C | -0.522328 | 1.524943  | -0.539641 |
| C | 0.041823  | 2.063723  | 0.626084  |
| C | -0.663373 | 3.000887  | 1.385725  |
| H | 0.791198  | -2.002068 | 1.564751  |
| H | 4.972236  | 0.420522  | 0.365753  |
| H | 2.629455  | -0.087649 | -2.506265 |
| H | -0.333579 | -2.079709 | -1.936589 |
| H | 0.145982  | -2.699415 | -0.367034 |
| H | 1.184954  | 1.035227  | -1.727205 |
| H | -0.317060 | 0.293200  | -2.300690 |
| H | 4.754024  | -0.687032 | 2.555104  |
| H | 2.698600  | -2.014352 | 3.122013  |
| H | -5.429423 | -1.269662 | 0.813441  |
| H | -4.932054 | -1.881082 | -1.549365 |
| H | -2.586520 | -2.101446 | -2.305237 |
| H | -1.221831 | -1.099676 | 1.654971  |
| H | -3.554665 | -0.885285 | 2.406094  |
| H | -2.480778 | 4.152873  | 1.569796  |
| H | -3.481424 | 3.221421  | -0.512216 |
| H | -2.240912 | 1.544316  | -1.843075 |
| H | 1.034737  | 1.757142  | 0.942634  |
| H | -0.215761 | 3.408315  | 2.287569  |

### 1o (C)

$\Delta G = -941.409996$  hartree

|   |           |           |           |
|---|-----------|-----------|-----------|
| C | -0.220286 | 1.335580  | -0.185762 |
| C | -1.029108 | 1.952831  | -1.148936 |
| C | -0.824761 | 3.317723  | -1.405245 |
| C | 0.151621  | 4.053769  | -0.725511 |
| C | 0.949553  | 3.423119  | 0.246984  |
| C | 0.759050  | 2.074544  | 0.505702  |
| C | 1.425812  | 1.163976  | 1.515352  |
| O | 2.826359  | 1.339736  | 1.680976  |
| C | -0.959594 | -1.032520 | -0.455455 |
| N | -0.226978 | 0.013057  | 0.235900  |
| C | 0.977914  | -0.275600 | 1.038716  |
| C | -5.200814 | -1.269531 | 0.439381  |
| C | -4.310929 | -0.777707 | 1.400150  |
| C | -2.946107 | -0.680254 | 1.112058  |
| C | -2.450887 | -1.071794 | -0.138965 |
| C | -3.350323 | -1.557233 | -1.098662 |
| C | -4.715349 | -1.659603 | -0.813013 |
| C | 4.117760  | -2.410513 | -1.069441 |
| C | 3.403713  | -1.400939 | -1.723245 |
| C | 2.384566  | -0.714779 | -1.056132 |
| C | 2.064014  | -1.026383 | 0.275458  |
| C | 2.784069  | -2.043284 | 0.918824  |
| C | 3.804037  | -2.731220 | 0.254677  |
| H | 1.013642  | 1.340586  | 2.515061  |
| H | 3.262054  | 1.193316  | 0.827461  |
| H | 0.701530  | -0.875880 | 1.910849  |
| H | -1.790888 | 1.399186  | -1.687261 |
| H | 1.710772  | 3.982484  | 0.784444  |
| H | -0.826349 | -0.949217 | -1.544636 |
| H | -0.510209 | -1.989008 | -0.167007 |
| H | 0.291631  | 5.107574  | -0.945433 |
| H | -1.441395 | 3.808373  | -2.153589 |
| H | -6.261369 | -1.342733 | 0.662154  |
| H | -4.678950 | -0.467686 | 2.374313  |
| H | -2.258934 | -0.290794 | 1.857484  |
| H | -2.981786 | -1.854640 | -2.077952 |
| H | -5.398135 | -2.035925 | -1.569635 |
| H | 4.906948  | -2.945679 | -1.589362 |
| H | 3.636664  | -1.148826 | -2.753795 |
| H | 1.829795  | 0.058209  | -1.579539 |
| H | 2.541923  | -2.300768 | 1.947008  |
| H | 4.347333  | -3.518953 | 0.768717  |

### 2o

$\Delta G = -828.090919$  hartree

|   |           |           |           |
|---|-----------|-----------|-----------|
| C | -1.037105 | -1.426982 | 0.106963  |
| C | -1.743664 | -1.309309 | 1.310226  |
| C | -2.893955 | -2.072109 | 1.537542  |
| C | -3.348686 | -2.965355 | 0.562601  |
| C | -2.647623 | -3.088783 | -0.641887 |
| C | -1.501667 | -2.321347 | -0.870707 |
| C | -0.036225 | 0.469907  | -1.060240 |
| N | 0.151026  | -0.624906 | -0.084450 |
| C | 1.348673  | -1.434051 | -0.391566 |

|   |           |           |           |
|---|-----------|-----------|-----------|
| C | -2.839837 | 3.513799  | 0.226677  |
| C | -3.105984 | 2.753582  | -0.914880 |
| C | -2.203625 | 1.764298  | -1.324688 |
| C | -1.027409 | 1.521399  | -0.603817 |
| C | -0.769025 | 2.293405  | 0.540238  |
| C | -1.665662 | 3.280567  | 0.953866  |
| C | 5.086449  | 0.612449  | 0.413499  |
| C | 4.837392  | 0.078409  | -0.853235 |
| C | 3.623542  | -0.568784 | -1.114581 |
| C | 2.646271  | -0.693973 | -0.118428 |
| C | 2.907669  | -0.154119 | 1.151217  |
| C | 4.115679  | 0.494328  | 1.416276  |
| H | -1.379363 | -0.618299 | 2.063786  |
| H | -2.993070 | -3.781115 | -1.404708 |
| H | 0.944656  | 0.938624  | -1.193658 |
| H | -0.341794 | 0.082017  | -2.047227 |
| H | 1.301946  | -2.323414 | 0.245864  |
| H | 1.354786  | -1.790168 | -1.435957 |
| H | -4.239401 | -3.561260 | 0.739303  |
| H | -3.430888 | -1.970184 | 2.476443  |
| H | -3.537841 | 4.281705  | 0.547779  |
| H | -4.013954 | 2.925891  | -1.486027 |
| H | -2.417160 | 1.175246  | -2.213223 |
| H | 0.140111  | 2.115460  | 1.108013  |
| H | -1.449024 | 3.870366  | 1.840329  |
| H | 6.026339  | 1.116397  | 0.619857  |
| H | 5.582031  | 0.167089  | -1.639291 |
| H | 3.434316  | -0.978723 | -2.103828 |
| H | 2.155612  | -0.241692 | 1.930201  |
| H | 4.302748  | 0.904702  | 2.404818  |
| H | -0.968471 | -2.422295 | -1.811793 |

### 1p (O-State)

$\Delta G = -748.526650$  hartree

|   |           |           |           |
|---|-----------|-----------|-----------|
| C | 2.561731  | -0.546958 | 0.494217  |
| C | 3.901154  | -0.829227 | 0.206620  |
| C | 4.596553  | -0.067217 | -0.738391 |
| C | 3.945982  | 0.972119  | -1.411191 |
| C | 2.603109  | 1.249980  | -1.134723 |
| C | 1.910068  | 0.498211  | -0.179333 |
| C | 1.721191  | -1.334884 | 1.465352  |
| C | 0.487351  | 0.831028  | 0.210856  |
| N | -0.337560 | -0.364979 | 0.478959  |
| C | 0.351042  | -1.615077 | 0.839451  |
| C | -4.252496 | -0.561999 | -1.117713 |
| C | -3.489765 | -1.720843 | -0.899146 |
| C | -2.228325 | -1.657400 | -0.322032 |
| C | -1.649184 | -0.418251 | 0.066031  |
| C | -2.488943 | 0.746955  | -0.024472 |
| C | -2.298411 | 2.004437  | 0.699756  |
| O | -1.524749 | 2.227274  | 1.632934  |
| C | -3.744736 | 0.646745  | -0.671084 |
| H | 4.400178  | -1.647007 | 0.720745  |
| H | 5.637404  | -0.289990 | -0.954856 |
| H | 4.478380  | 1.559631  | -2.153558 |

|   |           |           |           |
|---|-----------|-----------|-----------|
| H | 2.096020  | 2.054360  | -1.661992 |
| H | 1.586407  | -0.777914 | 2.402979  |
| H | 2.196329  | -2.286603 | 1.720524  |
| H | 0.009099  | 1.404743  | -0.588354 |
| H | 0.491530  | 1.480901  | 1.094716  |
| H | -0.278450 | -2.165309 | 1.545774  |
| H | 0.496423  | -2.250961 | -0.046575 |
| H | -5.224781 | -0.616375 | -1.595638 |
| H | -3.873127 | -2.688765 | -1.210260 |
| H | -1.661979 | -2.573802 | -0.222642 |
| H | -4.343117 | 1.550191  | -0.762143 |
| H | -3.007342 | 2.797839  | 0.389896  |

### 1p (H-State)

$\Delta G = -748.526676$  hartree

|   |           |           |           |
|---|-----------|-----------|-----------|
| C | 2.537123  | -0.687291 | 0.399480  |
| C | 3.913880  | -0.629315 | 0.668203  |
| C | 4.729272  | 0.322568  | 0.055103  |
| C | 4.170226  | 1.239028  | -0.843663 |
| C | 2.803038  | 1.189471  | -1.117330 |
| C | 1.980166  | 0.233331  | -0.503096 |
| C | 1.656370  | -1.710600 | 1.086295  |
| C | 0.507578  | 0.183280  | -0.857841 |
| N | -0.282126 | -0.563173 | 0.139971  |
| C | 0.307707  | -1.885421 | 0.384793  |
| C | -4.480928 | -0.272894 | -0.445000 |
| C | -3.819445 | -1.490317 | -0.654691 |
| C | -2.442446 | -1.600306 | -0.458112 |
| C | -1.684624 | -0.493670 | -0.032829 |
| C | -2.365764 | 0.727948  | 0.227534  |
| C | -1.668859 | 1.862286  | 0.858237  |
| O | -2.140126 | 2.991983  | 0.976187  |
| C | -3.749994 | 0.824613  | -0.004947 |
| H | 4.347072  | -1.342247 | 1.366031  |
| H | 5.792618  | 0.350382  | 0.275205  |
| H | 4.794072  | 1.986909  | -1.324415 |
| H | 2.365616  | 1.901013  | -1.814054 |
| H | 1.478247  | -1.399041 | 2.123999  |
| H | 2.169178  | -2.678368 | 1.132714  |
| H | 0.389283  | -0.287893 | -1.851873 |
| H | 0.116641  | 1.198881  | -0.948935 |
| H | -0.365597 | -2.462311 | 1.022308  |
| H | 0.442334  | -2.445249 | -0.557214 |
| H | -5.550564 | -0.192528 | -0.609829 |
| H | -4.377157 | -2.359296 | -0.992156 |
| H | -1.953694 | -2.545779 | -0.662575 |
| H | -4.239129 | 1.771052  | 0.203752  |
| H | -0.672825 | 1.634544  | 1.274932  |

### 1p (A, O-State)

$\Delta G = -748.450381$  hartree

|   |          |           |           |
|---|----------|-----------|-----------|
| C | 2.405056 | 0.364570  | 0.596970  |
| C | 3.785210 | 0.604235  | 0.691640  |
| C | 4.691561 | -0.065223 | -0.130252 |

|   |           |           |           |
|---|-----------|-----------|-----------|
| C | 4.223166  | -0.996604 | -1.064844 |
| C | 2.854660  | -1.245443 | -1.163957 |
| C | 1.940511  | -0.570059 | -0.341137 |
| C | 1.427817  | 1.115935  | 1.473071  |
| C | 0.467986  | -0.898350 | -0.482499 |
| N | -0.410347 | -0.059401 | 0.331857  |
| C | 0.106638  | 0.366622  | 1.635775  |
| C | -4.576092 | -0.588405 | -0.138863 |
| C | -3.841998 | -1.547208 | 0.590078  |
| C | -2.456903 | -1.378436 | 0.749003  |
| C | -1.821769 | -0.273942 | 0.192543  |
| C | -2.548121 | 0.711319  | -0.549668 |
| C | -1.811885 | 1.796765  | -1.074088 |
| O | -0.525156 | 1.910667  | -0.889084 |
| C | -3.953275 | 0.516562  | -0.698955 |
| H | 4.146943  | 1.324852  | 1.421094  |
| H | 5.755601  | 0.133410  | -0.041042 |
| H | 4.919072  | -1.525702 | -1.709094 |
| H | 2.488856  | -1.970864 | -1.886913 |
| H | 1.216116  | 2.096258  | 1.031871  |
| H | 1.860158  | 1.288358  | 2.464145  |
| H | 0.296209  | -1.950127 | -0.199662 |
| H | 0.145092  | -0.796112 | -1.522893 |
| H | -0.651094 | 0.994448  | 2.106902  |
| H | 0.246143  | -0.527601 | 2.264365  |
| H | -5.647910 | -0.716514 | -0.264438 |
| H | -4.337067 | -2.409010 | 1.025181  |
| H | -1.879218 | -2.109906 | 1.307740  |
| H | -4.531869 | 1.247179  | -1.257812 |
| H | -2.308725 | 2.577782  | -1.658684 |

### 1p (A, H-State)

$\Delta G = -748.449844$  hartree

|   |           |           |           |
|---|-----------|-----------|-----------|
| C | -2.442431 | -0.654543 | 0.201698  |
| C | -3.721260 | -0.895486 | -0.325757 |
| C | -4.444741 | 0.119222  | -0.951232 |
| C | -3.892260 | 1.400851  | -1.060955 |
| C | -2.621708 | 1.651252  | -0.543753 |
| C | -1.894502 | 0.632508  | 0.089123  |
| C | -1.660643 | -1.776543 | 0.852554  |
| C | -0.530430 | 0.979304  | 0.678310  |
| N | 0.272839  | -0.226023 | 0.920009  |
| C | -0.466358 | -1.249210 | 1.663744  |
| C | 3.717893  | -1.037604 | -1.318892 |
| C | 2.857333  | -2.104230 | -0.941694 |
| C | 1.736208  | -1.811517 | -0.171386 |
| C | 1.451136  | -0.492755 | 0.248012  |
| C | 2.423975  | 0.591970  | -0.010716 |
| C | 2.417297  | 1.858225  | 0.660430  |
| O | 3.261333  | 2.783776  | 0.415306  |
| C | 3.502087  | 0.260177  | -0.882985 |
| H | -4.148739 | -1.891438 | -0.241123 |
| H | -5.433226 | -0.086598 | -1.351015 |
| H | -4.445960 | 2.197866  | -1.548032 |
| H | -2.188920 | 2.644774  | -0.629618 |

|   |           |           |           |
|---|-----------|-----------|-----------|
| H | -1.304551 | -2.471251 | 0.082006  |
| H | -2.305943 | -2.355883 | 1.521342  |
| H | -0.665079 | 1.503641  | 1.633604  |
| H | 0.007394  | 1.639235  | 0.000479  |
| H | 0.212043  | -2.047272 | 1.961216  |
| H | -0.828952 | -0.759595 | 2.575367  |
| H | 4.579682  | -1.247281 | -1.947389 |
| H | 3.037596  | -3.114451 | -1.289625 |
| H | 1.024239  | -2.601124 | 0.038060  |
| H | 4.209447  | 1.044837  | -1.125575 |
| H | 1.660868  | 2.026758  | 1.438794  |

### 1p (TS1)

$\Delta G = -748.440655$  hartree

|   |           |           |           |
|---|-----------|-----------|-----------|
| C | 2.472570  | -0.680189 | 0.483988  |
| C | 3.856795  | -0.852737 | 0.597738  |
| C | 4.736697  | -0.047418 | -0.130394 |
| C | 4.231501  | 0.933954  | -0.990738 |
| C | 2.851950  | 1.106235  | -1.115331 |
| C | 1.966459  | 0.305367  | -0.378302 |
| C | 1.478638  | -1.525992 | 1.240746  |
| C | 0.490377  | 0.566278  | -0.468865 |
| N | -0.373371 | -0.506326 | -0.033839 |
| C | 0.230288  | -1.777305 | 0.389796  |
| C | -4.570983 | -0.332686 | -0.408570 |
| C | -3.868112 | -1.518849 | -0.717045 |
| C | -2.483211 | -1.512621 | -0.563107 |
| C | -1.771013 | -0.373574 | -0.140789 |
| C | -2.476756 | 0.872495  | 0.185833  |
| C | -2.004293 | 2.105418  | 0.749338  |
| O | -0.809731 | 2.514034  | 1.002219  |
| C | -3.899720 | 0.794184  | 0.032994  |
| H | 4.245716  | -1.624784 | 1.256835  |
| H | 5.808893  | -0.190548 | -0.034367 |
| H | 4.908635  | 1.558086  | -1.566164 |
| H | 2.458756  | 1.865639  | -1.786423 |
| H | 1.184557  | -1.036211 | 2.178509  |
| H | 1.911345  | -2.494812 | 1.507809  |
| H | 0.194903  | 0.864829  | -1.484045 |
| H | 0.199766  | 1.452868  | 0.173278  |
| H | -0.515006 | -2.338699 | 0.951084  |
| H | 0.505661  | -2.353315 | -0.505674 |
| H | -5.652359 | -0.299089 | -0.509985 |
| H | -4.381282 | -2.407346 | -1.065963 |
| H | -1.927674 | -2.411035 | -0.809457 |
| H | -4.476292 | 1.676966  | 0.296849  |
| H | -2.821303 | 2.794100  | 1.013084  |

### 1p (B)

$\Delta G = -748.474154$  hartree

|   |          |           |           |
|---|----------|-----------|-----------|
| C | 2.506995 | 0.448353  | 0.558929  |
| C | 3.879790 | 0.508616  | 0.781378  |
| C | 4.775812 | -0.262250 | 0.024243  |
| C | 4.279827 | -1.111908 | -0.980807 |

|   |           |           |           |
|---|-----------|-----------|-----------|
| C | 2.914827  | -1.197885 | -1.216415 |
| C | 1.991828  | -0.429553 | -0.447749 |
| C | 1.520202  | 1.311569  | 1.310854  |
| C | 0.599326  | -0.524376 | -0.671374 |
| N | -0.331091 | 0.203958  | 0.086249  |
| C | 0.154538  | 0.632760  | 1.427373  |
| C | -4.335770 | -1.245674 | 0.202294  |
| C | -3.271665 | -2.080159 | 0.591902  |
| C | -1.962044 | -1.588395 | 0.532994  |
| C | -1.695952 | -0.296388 | 0.085760  |
| C | -2.762028 | 0.563007  | -0.339434 |
| C | -2.579047 | 1.864494  | -0.855307 |
| O | -1.373364 | 2.447755  | -1.057438 |
| C | -4.090334 | 0.039788  | -0.250149 |
| H | 4.261940  | 1.172557  | 1.553836  |
| H | 5.843133  | -0.200403 | 0.213374  |
| H | 4.966958  | -1.708431 | -1.574647 |
| H | 2.533700  | -1.861244 | -1.988775 |
| H | 1.400837  | 2.275722  | 0.795522  |
| H | 1.890061  | 1.540346  | 2.315956  |
| H | 0.192225  | -1.120222 | -1.479380 |
| H | -0.692025 | 1.794131  | -0.761998 |
| H | -0.586907 | 1.314736  | 1.850022  |
| H | 0.220456  | -0.246959 | 2.083618  |
| H | -5.357497 | -1.611306 | 0.250088  |
| H | -3.459618 | -3.090836 | 0.939488  |
| H | -1.130248 | -2.215661 | 0.842243  |
| H | -4.916992 | 0.672816  | -0.561439 |
| H | -3.419287 | 2.483007  | -1.149100 |

### 1p (C)

$\Delta G = -748.534700$  hartree

|   |           |           |           |
|---|-----------|-----------|-----------|
| C | -2.291893 | 0.914640  | 0.115949  |
| C | -3.678313 | 0.929640  | 0.339710  |
| C | -4.454901 | -0.215468 | 0.160889  |
| C | -3.848282 | -1.405614 | -0.256302 |
| C | -2.472607 | -1.434164 | -0.485353 |
| C | -1.684933 | -0.289014 | -0.294234 |
| C | -1.482779 | 2.183454  | 0.336156  |
| C | -0.207773 | -0.312718 | -0.616156 |
| N | 0.492288  | 0.848255  | -0.050327 |
| C | -0.101222 | 2.142031  | -0.328668 |
| C | 4.422465  | -0.542766 | 0.006338  |
| C | 4.232872  | 0.843263  | 0.075600  |
| C | 2.952508  | 1.414271  | 0.047392  |
| C | 1.851846  | 0.554490  | -0.050209 |
| C | 2.036549  | -0.844126 | -0.128603 |
| C | 0.671343  | -1.508120 | -0.147702 |
| O | 0.309520  | -2.045061 | 1.134225  |
| C | 3.310382  | -1.395710 | -0.092676 |
| H | -0.094770 | -0.284869 | -1.718626 |
| H | -4.151502 | 1.856826  | 0.654777  |
| H | -5.525817 | -0.179001 | 0.339133  |
| H | -4.442009 | -2.303200 | -0.402727 |
| H | -2.003214 | -2.357672 | -0.812060 |

|   |           |           |           |
|---|-----------|-----------|-----------|
| H | -1.346523 | 2.334554  | 1.415215  |
| H | -2.044228 | 3.049220  | -0.032594 |
| H | 0.408231  | -1.346474 | 1.798287  |
| H | 0.534709  | 2.932328  | 0.077056  |
| H | -0.187407 | 2.307900  | -1.417021 |
| H | 5.426360  | -0.955493 | 0.022342  |
| H | 5.097348  | 1.497953  | 0.145722  |
| H | 2.830175  | 2.491350  | 0.096650  |
| H | 3.445286  | -2.473064 | -0.145281 |
| H | 0.599624  | -2.352195 | -0.835165 |

### 1p (TS2)

$\Delta G = -748.432369$  hartree

|   |           |           |           |
|---|-----------|-----------|-----------|
| C | 2.235084  | -0.163910 | 0.736055  |
| C | 3.502213  | 0.376530  | 1.007255  |
| C | 4.414407  | 0.625278  | -0.017652 |
| C | 4.065704  | 0.338068  | -1.342788 |
| C | 2.808875  | -0.196033 | -1.624787 |
| C | 1.890980  | -0.452577 | -0.595094 |
| C | 1.245468  | -0.385801 | 1.863259  |
| C | 0.558384  | -1.089990 | -0.945063 |
| N | -0.464185 | -0.929419 | 0.120933  |
| C | 0.081779  | -1.291873 | 1.461604  |
| C | -3.240723 | 2.253492  | -0.131688 |
| C | -1.885356 | 2.594151  | 0.043543  |
| C | -0.908892 | 1.574966  | 0.136327  |
| C | -1.311944 | 0.259283  | 0.052708  |
| C | -2.684785 | -0.112968 | -0.150398 |
| C | -2.854011 | -1.509548 | -0.260233 |
| O | -3.779681 | -2.317890 | -0.441873 |
| C | -3.657937 | 0.931049  | -0.230163 |
| H | 3.770541  | 0.602512  | 2.036378  |
| H | 5.390533  | 1.041339  | 0.213622  |
| H | 4.766354  | 0.532296  | -2.149308 |
| H | 2.534008  | -0.417198 | -2.653260 |
| H | 0.857297  | 0.580644  | 2.207908  |
| H | 1.748792  | -0.835815 | 2.725888  |
| H | 0.688072  | -2.168543 | -1.097718 |
| H | 0.148895  | -0.672087 | -1.866965 |
| H | -0.736978 | -1.238503 | 2.181418  |
| H | 0.409426  | -2.333724 | 1.386407  |
| H | -3.981848 | 3.046204  | -0.197986 |
| H | -1.584495 | 3.634259  | 0.108803  |
| H | 0.136583  | 1.834669  | 0.263439  |
| H | -4.704903 | 0.686069  | -0.376299 |
| H | -1.511006 | -1.743778 | -0.111196 |

### 1p (D)

$\Delta G = -748.437074$  hartree

|   |          |           |           |
|---|----------|-----------|-----------|
| C | 2.197364 | -0.302362 | 0.735478  |
| C | 3.434728 | 0.190565  | 1.178241  |
| C | 4.421528 | 0.576352  | 0.272131  |
| C | 4.179531 | 0.477737  | -1.103265 |
| C | 2.952805 | -0.005735 | -1.554946 |

|   |           |           |           |
|---|-----------|-----------|-----------|
| C | 1.959784  | -0.398815 | -0.644746 |
| C | 1.120102  | -0.674825 | 1.733510  |
| C | 0.673135  | -0.971022 | -1.201009 |
| N | -0.449764 | -1.022076 | -0.194095 |
| C | 0.046828  | -1.569788 | 1.135331  |
| C | -3.052484 | 2.332975  | 0.123800  |
| C | -1.658720 | 2.562348  | 0.123322  |
| C | -0.781624 | 1.464724  | 0.016720  |
| C | -1.298008 | 0.188377  | -0.086546 |
| C | -2.708717 | -0.089213 | -0.113941 |
| C | -3.170901 | -1.413826 | -0.274492 |
| O | -4.307991 | -1.907169 | -0.363175 |
| C | -3.574310 | 1.056348  | 0.008356  |
| H | 3.620004  | 0.269328  | 2.246468  |
| H | 5.373674  | 0.952287  | 0.634372  |
| H | 4.939699  | 0.778723  | -1.817585 |
| H | 2.760065  | -0.079964 | -2.622144 |
| H | 0.660278  | 0.233986  | 2.140651  |
| H | 1.558238  | -1.204128 | 2.585874  |
| H | 0.827810  | -2.003647 | -1.530339 |
| H | 0.310886  | -0.395257 | -2.054062 |
| H | -0.826578 | -1.659322 | 1.781690  |
| H | 0.432915  | -2.569737 | 0.919302  |
| H | -3.731460 | 3.178003  | 0.210681  |
| H | -1.259651 | 3.567397  | 0.204057  |
| H | 0.290053  | 1.631424  | 0.008848  |
| H | -4.647889 | 0.895612  | -0.000791 |
| H | -1.142017 | -1.725856 | -0.530623 |

### 1p (TS3)

$\Delta G = -748.434211$  hartree

|   |           |           |           |
|---|-----------|-----------|-----------|
| C | 2.492737  | 0.465396  | 0.551056  |
| C | 3.858543  | 0.464022  | 0.848896  |
| C | 4.762838  | -0.178493 | -0.003946 |
| C | 4.304615  | -0.834107 | -1.151267 |
| C | 2.937553  | -0.852186 | -1.445522 |
| C | 2.036245  | -0.196728 | -0.601512 |
| C | 1.446647  | 1.166370  | 1.381416  |
| C | 0.552738  | -0.181139 | -0.846821 |
| N | -0.161568 | -0.594253 | 0.433301  |
| C | 0.188718  | 0.310533  | 1.618882  |
| C | -4.346446 | -1.034556 | -0.134815 |
| C | -3.577834 | -2.148203 | 0.227401  |
| C | -2.198881 | -1.998436 | 0.413540  |
| C | -1.653119 | -0.724522 | 0.228926  |
| C | -2.354421 | 0.417630  | -0.128580 |
| C | -1.746362 | 2.577773  | -0.604775 |
| O | -2.769267 | 3.098111  | -0.842550 |
| C | -3.730111 | 0.214295  | -0.308266 |
| H | 4.216200  | 0.968284  | 1.742676  |
| H | 5.823231  | -0.171644 | 0.230531  |
| H | 5.006607  | -1.337343 | -1.809151 |
| H | 2.574605  | -1.372334 | -2.327958 |
| H | 1.144999  | 2.088150  | 0.868506  |
| H | 1.844019  | 1.463341  | 2.355773  |

|   |           |           |           |
|---|-----------|-----------|-----------|
| H | 0.247743  | -0.886005 | -1.620909 |
| H | 0.159799  | 0.808558  | -1.091856 |
| H | -0.681579 | 0.944126  | 1.777197  |
| H | 0.311382  | -0.355465 | 2.474210  |
| H | -5.419337 | -1.147114 | -0.280417 |
| H | -4.040199 | -3.121194 | 0.364668  |
| H | -1.587557 | -2.854932 | 0.694969  |
| H | -4.350662 | 1.068559  | -0.596778 |
| H | 0.195117  | -1.525990 | 0.658159  |

### 1p (E)

$\Delta G = -635.122376$  hartree

|   |           |           |           |
|---|-----------|-----------|-----------|
| C | 1.757822  | 0.385054  | -0.666393 |
| C | 2.875473  | -0.162727 | -1.315315 |
| C | 3.807000  | -0.931648 | -0.619199 |
| C | 3.628145  | -1.168385 | 0.749090  |
| C | 2.520403  | -0.631779 | 1.403440  |
| C | 1.583420  | 0.146349  | 0.706161  |
| C | 0.732666  | 1.180435  | -1.447440 |
| C | 0.432650  | 0.748590  | 1.485367  |
| N | -0.687279 | 1.258226  | 0.615809  |
| C | -0.138474 | 2.049642  | -0.554246 |
| C | -3.838164 | -1.407487 | -0.355304 |
| C | -2.521274 | -1.854846 | -0.521950 |
| C | -1.461048 | -0.997529 | -0.211806 |
| C | -1.786309 | 0.279792  | 0.257163  |
| C | -3.061950 | 0.805102  | 0.465720  |
| C | -4.086881 | -0.112503 | 0.124611  |
| H | 3.010539  | 0.020051  | -2.378420 |
| H | 4.666515  | -1.344743 | -1.138606 |
| H | 4.345162  | -1.768914 | 1.300530  |
| H | 2.378098  | -0.816937 | 2.465195  |
| H | 0.101499  | 0.500060  | -2.032163 |
| H | 1.230834  | 1.834016  | -2.170733 |
| H | 0.780712  | 1.606966  | 2.068938  |
| H | -0.003937 | 0.026973  | 2.178373  |
| H | -1.000484 | 2.455767  | -1.084549 |
| H | 0.435007  | 2.874070  | -0.121580 |
| H | -4.665344 | -2.073761 | -0.594706 |
| H | -2.316707 | -2.857522 | -0.886307 |
| H | -0.436924 | -1.339550 | -0.328612 |
| H | -5.131514 | 0.182262  | 0.243688  |
| H | -1.243383 | 1.925320  | 1.168903  |

### 1p (TS4)

$\Delta G = -635.109871$  hartree

|   |          |           |           |
|---|----------|-----------|-----------|
| C | 1.836557 | 0.420568  | -0.615064 |
| C | 2.978383 | -0.113090 | -1.233732 |
| C | 3.857543 | -0.941115 | -0.535968 |
| C | 3.600182 | -1.254331 | 0.804048  |
| C | 2.466625 | -0.733493 | 1.427701  |
| C | 1.582568 | 0.104274  | 0.730945  |
| C | 0.877094 | 1.290363  | -1.406443 |
| C | 0.389530 | 0.692763  | 1.460712  |



|   |           |           |           |
|---|-----------|-----------|-----------|
| N | -0.678371 | 1.173541  | 0.547352  |
| C | -0.107449 | 2.047729  | -0.515444 |
| C | -3.971557 | -1.253060 | -0.309829 |
| C | -2.751401 | -1.712983 | -0.825401 |
| C | -1.569412 | -0.987100 | -0.611834 |
| C | -1.698588 | 0.186747  | 0.124991  |
| C | -2.881734 | 0.694162  | 0.677986  |
| C | -4.042250 | -0.062064 | 0.435170  |
| H | 3.176364  | 0.128280  | -2.275412 |
| H | 4.736830  | -1.340712 | -1.032735 |
| H | 4.275235  | -1.901581 | 1.356087  |
| H | 2.261806  | -0.977957 | 2.467355  |
| H | 0.322994  | 0.666629  | -2.119420 |
| H | 1.435642  | 2.014877  | -2.009439 |
| H | 0.702983  | 1.556402  | 2.059811  |
| H | -0.055009 | -0.036233 | 2.142657  |
| H | -0.939609 | 2.455249  | -1.094100 |
| H | 0.390841  | 2.874840  | 0.000697  |
| H | -4.873237 | -1.835275 | -0.488238 |
| H | -2.717145 | -2.638655 | -1.393000 |
| H | -0.620771 | -1.345059 | -1.000331 |
| H | -5.009993 | 0.253095  | 0.823642  |
| H | -1.734885 | 1.635089  | 1.083933  |

## 2p

$\Delta G = -635.208605$  hartree

|   |           |           |           |
|---|-----------|-----------|-----------|
| C | 1.774074  | 0.681214  | -0.440551 |
| C | 2.851876  | 0.489218  | -1.318924 |
| C | 3.765020  | -0.549274 | -1.127466 |
| C | 3.608653  | -1.419653 | -0.042628 |
| C | 2.540579  | -1.237401 | 0.837825  |
| C | 1.620433  | -0.196363 | 0.649250  |
| C | 0.777980  | 1.802985  | -0.679845 |
| C | 0.490376  | 0.025626  | 1.647385  |
| N | -0.622063 | 0.806381  | 1.107655  |
| C | -0.106597 | 2.067531  | 0.548246  |
| C | -3.879066 | -1.124262 | -0.835633 |
| C | -2.797630 | -1.870451 | -0.363438 |
| C | -1.704379 | -1.250246 | 0.249596  |
| C | -1.668465 | 0.150161  | 0.427623  |
| C | -3.848954 | 0.266588  | -0.676368 |
| H | 2.974441  | 1.165903  | -2.161748 |
| H | 4.592888  | -0.679059 | -1.818746 |
| H | 4.310221  | -2.234196 | 0.113335  |
| H | 2.414989  | -1.912544 | 1.681696  |
| H | 0.136623  | 1.540129  | -1.532540 |
| H | 1.305227  | 2.721820  | -0.963262 |
| H | 0.883557  | 0.583562  | 2.508621  |
| H | 0.127875  | -0.922961 | 2.047357  |
| H | -0.923782 | 2.743471  | 0.296665  |
| H | 0.476325  | 2.555174  | 1.337702  |
| H | -4.722628 | -1.610047 | -1.316137 |
| H | -2.788046 | -2.950856 | -0.480972 |
| H | -0.877519 | -1.869566 | 0.574592  |
| H | -4.678766 | 0.873352  | -1.029008 |

|   |           |          |           |
|---|-----------|----------|-----------|
| C | -2.770527 | 0.894401 | -0.055834 |
| H | -2.797205 | 1.970709 | 0.073420  |

## 3p

$\Delta G = -672.148338$  hartree

|   |           |           |           |
|---|-----------|-----------|-----------|
| C | -2.284402 | 0.789213  | 0.156401  |
| C | -3.681845 | 0.845755  | 0.120199  |
| C | -4.444882 | -0.312609 | -0.051273 |
| C | -3.806158 | -1.550184 | -0.195065 |
| C | -2.414405 | -1.621748 | -0.171862 |
| C | -1.640329 | -0.460995 | 0.007681  |
| C | -1.444137 | 2.025904  | 0.398181  |
| C | -0.178447 | -0.509993 | 0.037272  |
| N | 0.537255  | 0.679081  | -0.062286 |
| C | -0.104035 | 1.960846  | -0.339521 |
| C | 4.426778  | -0.724900 | 0.057706  |
| C | 4.262644  | 0.670398  | -0.100094 |
| C | 2.995579  | 1.248318  | -0.158999 |
| C | 1.887247  | 0.395444  | -0.055572 |
| C | 2.030311  | -1.018576 | 0.092449  |
| C | 0.709096  | -1.566524 | 0.146980  |
| C | 3.325613  | -1.570511 | 0.154807  |
| H | -4.176846 | 1.807355  | 0.231114  |
| H | -5.528735 | -0.249929 | -0.077510 |
| H | -4.391007 | -2.454512 | -0.334734 |
| H | -1.921417 | -2.580300 | -0.302887 |
| H | -1.248796 | 2.126757  | 1.475027  |
| H | -1.985603 | 2.924191  | 0.087091  |
| H | 0.555792  | 2.763960  | -0.004861 |
| H | -0.253088 | 2.073515  | -1.422158 |
| H | 5.429678  | -1.140025 | 0.100896  |
| H | 5.140318  | 1.305560  | -0.177223 |
| H | 2.880109  | 2.320641  | -0.281514 |
| H | 3.460579  | -2.642392 | 0.272534  |
| H | 0.446466  | -2.607418 | 0.274498  |

## 1q (O-State)

$\Delta G = -556.832140$  hartree

|   |           |           |           |
|---|-----------|-----------|-----------|
| C | 0.424218  | -0.364898 | -0.117608 |
| C | 1.018630  | -1.652594 | -0.253058 |
| C | 2.373381  | -1.853539 | -0.033047 |
| C | 3.221986  | -0.791356 | 0.325029  |
| C | 2.683786  | 0.483391  | 0.376047  |
| C | 1.319099  | 0.742929  | 0.098154  |
| C | -3.040688 | 0.189672  | 0.857295  |
| C | -1.689734 | 0.836482  | 0.525527  |
| N | -0.935393 | -0.233274 | -0.161481 |
| C | -1.812637 | -1.383122 | -0.458375 |
| C | -3.225547 | -0.820839 | -0.283985 |
| C | 1.026766  | 2.151804  | -0.156323 |
| O | 0.087551  | 2.622257  | -0.802615 |
| H | 0.399882  | -2.507615 | -0.492668 |
| H | 2.772910  | -2.860289 | -0.120225 |
| H | 4.274730  | -0.961326 | 0.523886  |

|   |           |           |           |
|---|-----------|-----------|-----------|
| H | 3.329596  | 1.333999  | 0.581310  |
| H | -3.843295 | 0.929754  | 0.915383  |
| H | -2.990250 | -0.334450 | 1.818811  |
| H | -1.138995 | 1.167721  | 1.413429  |
| H | -1.807285 | 1.704295  | -0.129207 |
| H | -1.635668 | -2.199541 | 0.257052  |
| H | -1.619324 | -1.766392 | -1.465496 |
| H | -3.951781 | -1.605797 | -0.057825 |
| H | -3.547820 | -0.309983 | -1.198517 |
| H | 1.809066  | 2.836909  | 0.227415  |

### 1q (H-State)

$\Delta G = -556.825058$  hartree

|   |           |           |           |
|---|-----------|-----------|-----------|
| C | 0.257063  | -0.448349 | -0.128011 |
| C | 0.655028  | -1.818608 | -0.108993 |
| C | 1.973061  | -2.193029 | 0.094989  |
| C | 2.983726  | -1.232929 | 0.284578  |
| C | 2.636707  | 0.103231  | 0.205879  |
| C | 1.309328  | 0.529334  | -0.040007 |
| C | -3.104848 | 0.703565  | 0.697701  |
| C | -1.703535 | 1.118761  | 0.235946  |
| N | -1.078799 | -0.145569 | -0.209366 |
| C | -2.099904 | -1.208177 | -0.333576 |
| C | -3.433394 | -0.460481 | -0.246865 |
| C | 1.131802  | 1.952992  | -0.338618 |
| O | 1.989787  | 2.821242  | -0.148384 |
| H | -0.087845 | -2.595352 | -0.230084 |
| H | 2.218212  | -3.251473 | 0.116076  |
| H | 4.012396  | -1.533719 | 0.453597  |
| H | 3.394344  | 0.876406  | 0.283841  |
| H | -3.817111 | 1.530385  | 0.635019  |
| H | -3.074938 | 0.354019  | 1.736040  |
| H | -1.105156 | 1.578171  | 1.030322  |
| H | -1.781801 | 1.833672  | -0.591946 |
| H | -2.009518 | -1.925478 | 0.494528  |
| H | -1.976263 | -1.756626 | -1.273037 |
| H | -4.236700 | -1.104877 | 0.119123  |
| H | -3.723621 | -0.080029 | -1.232833 |
| H | 0.191108  | 2.246084  | -0.826151 |

### 1q (A, O-State)

$\Delta G = -556.749558$  hartree

|   |           |           |           |
|---|-----------|-----------|-----------|
| C | -0.580338 | -0.313990 | -0.004708 |
| C | -1.196136 | -1.560374 | 0.044954  |
| C | -2.596752 | -1.653917 | 0.071877  |
| C | -3.368552 | -0.472439 | 0.049689  |
| C | -2.766798 | 0.775224  | -0.002908 |
| C | -1.345626 | 0.897716  | -0.038161 |
| C | 3.067788  | -0.075620 | 0.740357  |
| C | 1.629629  | -0.258579 | 1.226564  |
| N | 0.841151  | -0.185417 | -0.011789 |
| C | 1.658267  | -0.537016 | -1.189318 |
| C | 3.067797  | -0.794309 | -0.624813 |
| C | -0.629009 | 2.113654  | -0.113239 |

|   |           |           |           |
|---|-----------|-----------|-----------|
| O | 0.671636  | 2.139639  | -0.160280 |
| H | -0.587107 | -2.460279 | 0.068601  |
| H | -3.075388 | -2.626789 | 0.111840  |
| H | -4.453001 | -0.540819 | 0.070962  |
| H | -3.374700 | 1.675845  | -0.025083 |
| H | 3.794954  | -0.495299 | 1.439453  |
| H | 3.280578  | 0.990360  | 0.615946  |
| H | 1.279683  | 0.499413  | 1.929967  |
| H | 1.478037  | -1.250604 | 1.679520  |
| H | 1.626512  | 0.303591  | -1.890009 |
| H | 1.221428  | -1.409600 | -1.686836 |
| H | 3.847933  | -0.427453 | -1.295711 |
| H | 3.222928  | -1.869068 | -0.484535 |
| H | -1.164626 | 3.069403  | -0.131110 |

### 1q (A, H-State)

$\Delta G = -556.742423$  hartree

|   |           |           |           |
|---|-----------|-----------|-----------|
| C | 0.265300  | -0.473649 | -0.105713 |
| C | 0.637697  | -1.839667 | -0.115048 |
| C | 1.958738  | -2.243157 | 0.066193  |
| C | 2.939781  | -1.248138 | 0.308063  |
| C | 2.626637  | 0.103518  | 0.271681  |
| C | 1.315864  | 0.569722  | -0.042381 |
| C | -3.121565 | 0.652749  | 0.752437  |
| C | -1.688031 | 1.079381  | 0.419097  |
| N | -1.070577 | -0.150925 | -0.138881 |
| C | -2.119854 | -1.147228 | -0.455984 |
| C | -3.432068 | -0.366417 | -0.351080 |
| C | 1.135475  | 1.950109  | -0.381579 |
| O | 2.059790  | 2.824139  | -0.260929 |
| H | -0.130484 | -2.598464 | -0.194656 |
| H | 2.214576  | -3.295976 | 0.085051  |
| H | 3.965157  | -1.547628 | 0.510286  |
| H | 3.403639  | 0.849474  | 0.391778  |
| H | -3.799312 | 1.509313  | 0.758665  |
| H | -3.158221 | 0.176254  | 1.738022  |
| H | -1.112303 | 1.437774  | 1.272108  |
| H | -1.702314 | 1.858866  | -0.350039 |
| H | -2.092456 | -1.949540 | 0.291894  |
| H | -1.926950 | -1.583852 | -1.439110 |
| H | -4.270448 | -1.023897 | -0.111607 |
| H | -3.652876 | 0.142469  | -1.295363 |
| H | 0.169865  | 2.265243  | -0.791542 |

### 1q (TS1)

$\Delta G = -556.740586$  hartree

|   |           |           |           |
|---|-----------|-----------|-----------|
| C | 0.547820  | -0.416191 | 0.138613  |
| C | 1.262587  | -1.613174 | 0.229008  |
| C | 2.659999  | -1.646261 | 0.160753  |
| C | 3.349322  | -0.432931 | -0.018788 |
| C | 2.655990  | 0.760672  | -0.129334 |
| C | 1.226207  | 0.850507  | -0.051582 |
| C | -3.126746 | 0.029607  | 0.568119  |
| C | -1.681933 | 0.464722  | 0.801506  |

|   |           |           |           |
|---|-----------|-----------|-----------|
| N | -0.866360 | -0.492462 | 0.167579  |
| C | -1.645287 | -1.479947 | -0.599556 |
| C | -3.028261 | -0.821841 | -0.713419 |
| C | 0.676811  | 2.151795  | -0.269928 |
| O | -0.561698 | 2.584052  | -0.192284 |
| H | 0.710829  | -2.539155 | 0.360673  |
| H | 3.191208  | -2.588206 | 0.243778  |
| H | 4.434326  | -0.425966 | -0.077541 |
| H | 3.208504  | 1.682426  | -0.294261 |
| H | -3.804638 | 0.880422  | 0.463002  |
| H | -3.479849 | -0.575556 | 1.412648  |
| H | -1.376808 | 0.661813  | 1.837630  |
| H | -1.366326 | 1.523235  | 0.280285  |
| H | -1.696165 | -2.420669 | -0.033592 |
| H | -1.158564 | -1.681060 | -1.557006 |
| H | -3.827254 | -1.561576 | -0.799393 |
| H | -3.059556 | -0.178531 | -1.598857 |
| H | 1.403342  | 2.915898  | -0.564501 |

### 1q (B)

$\Delta G = -556.749064$  hartree

|   |           |           |           |
|---|-----------|-----------|-----------|
| C | 0.526380  | -0.395115 | 0.081943  |
| C | 1.189919  | -1.618921 | 0.186012  |
| C | 2.588193  | -1.710448 | 0.159222  |
| C | 3.345108  | -0.534663 | 0.040259  |
| C | 2.709753  | 0.692642  | -0.061732 |
| C | 1.282434  | 0.827144  | -0.058876 |
| C | -3.127663 | -0.068219 | 0.722539  |
| C | -1.695213 | 0.366860  | 0.910598  |
| N | -0.890888 | -0.391727 | 0.058670  |
| C | -1.687210 | -1.321547 | -0.761742 |
| C | -3.100384 | -0.724363 | -0.675832 |
| C | 0.789363  | 2.141503  | -0.252595 |
| O | -0.485641 | 2.592391  | -0.246553 |
| H | 0.597893  | -2.523192 | 0.288531  |
| H | 3.071155  | -2.679216 | 0.237053  |
| H | 4.430263  | -0.580492 | 0.021622  |
| H | 3.305040  | 1.595489  | -0.170350 |
| H | -3.842088 | 0.758609  | 0.789893  |
| H | -3.416534 | -0.805272 | 1.488778  |
| H | -1.283367 | 0.624324  | 1.886637  |
| H | -1.109508 | 1.896646  | 0.116439  |
| H | -1.662454 | -2.333454 | -0.331599 |
| H | -1.287764 | -1.372011 | -1.778688 |
| H | -3.876638 | -1.481454 | -0.810416 |
| H | -3.227900 | 0.039198  | -1.450600 |
| H | 1.499166  | 2.934551  | -0.464347 |

### 1q (C)

$\Delta G = -556.841860$  hartree

|   |           |           |           |
|---|-----------|-----------|-----------|
| C | -0.577515 | -0.660405 | 0.254343  |
| C | -1.518274 | -1.664871 | -0.021488 |
| C | -2.849480 | -1.287640 | -0.231905 |
| C | -3.247592 | 0.056185  | -0.174630 |

|   |           |           |           |
|---|-----------|-----------|-----------|
| C | -2.295423 | 1.055208  | 0.075907  |
| C | -0.966338 | 0.693595  | 0.280379  |
| C | 2.603591  | 0.499546  | -0.259461 |
| C | 1.399874  | 0.531989  | 0.691668  |
| N | 0.774147  | -0.815633 | 0.534024  |
| C | 1.641952  | -1.721083 | -0.242251 |
| C | 2.996860  | -0.990012 | -0.258641 |
| C | 0.252853  | 1.574700  | 0.452712  |
| O | 0.449275  | 2.469416  | -0.655929 |
| H | 1.748652  | 0.636209  | 1.726374  |
| H | 0.177430  | 2.243042  | 1.314152  |
| H | -1.225555 | -2.709751 | -0.059106 |
| H | -3.589466 | -2.056345 | -0.438195 |
| H | -4.288503 | 0.321928  | -0.331336 |
| H | -2.588384 | 2.102033  | 0.093420  |
| H | 3.413490  | 1.158101  | 0.065697  |
| H | 2.306280  | 0.808969  | -1.267278 |
| H | 0.263703  | 1.990419  | -1.476720 |
| H | 1.249473  | -1.847969 | -1.262605 |
| H | 1.705536  | -2.710994 | 0.221117  |
| H | 3.604996  | -1.272816 | -1.122336 |
| H | 3.566075  | -1.231995 | 0.646285  |

### 1q (TS2)

$\Delta G = -556.726991$  hartree

|   |           |           |           |
|---|-----------|-----------|-----------|
| C | -0.460804 | -0.437560 | 0.007156  |
| C | -0.926594 | -1.733240 | 0.040417  |
| C | -2.323577 | -1.953996 | 0.050211  |
| C | -3.204850 | -0.854629 | 0.025251  |
| C | -2.744974 | 0.457582  | -0.007601 |
| C | -1.335940 | 0.698877  | -0.017640 |
| C | 3.210796  | -0.504277 | -0.695103 |
| C | 1.763095  | -0.376224 | -1.215260 |
| N | 0.934654  | -0.029226 | -0.008141 |
| C | 1.757856  | -0.292682 | 1.208947  |
| C | 3.170120  | 0.052982  | 0.743604  |
| C | -0.619927 | 1.914746  | -0.048329 |
| O | -0.864641 | 3.133460  | -0.078584 |
| H | -0.238325 | -2.573711 | 0.057181  |
| H | -2.710266 | -2.967159 | 0.075676  |
| H | -4.276850 | -1.036183 | 0.031339  |
| H | -3.439957 | 1.290769  | -0.027017 |
| H | 3.918499  | 0.033517  | -1.329926 |
| H | 3.507960  | -1.557069 | -0.681453 |
| H | 1.386797  | -1.305880 | -1.647638 |
| H | 1.635343  | 0.420567  | -1.952848 |
| H | 1.667276  | -1.351828 | 1.476825  |
| H | 1.381378  | 0.314774  | 2.035124  |
| H | 3.933104  | -0.387589 | 1.389502  |
| H | 3.308963  | 1.139539  | 0.746069  |
| H | 0.589425  | 1.287683  | -0.037088 |

### 1q (D)

$\Delta G = -556.733188$  hartree

|   |           |           |           |
|---|-----------|-----------|-----------|
| C | -0.390802 | -0.396652 | 0.000046  |
| C | -0.699307 | -1.741884 | 0.025528  |
| C | -2.048779 | -2.146114 | 0.038800  |
| C | -3.060516 | -1.159185 | 0.025242  |
| C | -2.755375 | 0.190486  | 0.000097  |
| C | -1.385420 | 0.639977  | -0.013656 |
| C | 3.319239  | -0.147676 | -0.734945 |
| C | 1.857946  | -0.309102 | -1.207022 |
| N | 1.003101  | 0.084261  | -0.010317 |
| C | 1.849957  | -0.231119 | 1.204679  |
| C | 3.242038  | 0.217863  | 0.771690  |
| C | -0.996913 | 1.996405  | -0.039520 |
| O | -1.637705 | 3.061650  | -0.058179 |
| H | 0.086413  | -2.492316 | 0.034059  |
| H | -2.300024 | -3.200801 | 0.058212  |
| H | -4.103632 | -1.466777 | 0.034650  |
| H | -3.544434 | 0.935945  | -0.009972 |
| H | 3.838644  | 0.625983  | -1.303814 |
| H | 3.857652  | -1.086630 | -0.882817 |
| H | 1.609308  | -1.340872 | -1.451825 |
| H | 1.573888  | 0.331197  | -2.042562 |
| H | 1.790930  | -1.307994 | 1.372172  |
| H | 1.434726  | 0.295157  | 2.064791  |
| H | 4.018848  | -0.271916 | 1.362326  |
| H | 3.346369  | 1.298187  | 0.913120  |
| H | 0.878830  | 1.119808  | -0.036314 |

### 1q (TS3)

$\Delta G = -556.729460$  hartree

|   |           |           |           |
|---|-----------|-----------|-----------|
| C | -0.477982 | -0.744806 | 0.000526  |
| C | -1.190769 | -1.948349 | 0.000759  |
| C | -2.588136 | -1.882512 | 0.000457  |
| C | -3.215110 | -0.629993 | -0.000072 |
| C | -2.439345 | 0.539139  | -0.000293 |
| C | -1.037606 | 0.527095  | 0.000005  |
| C | 3.186117  | -0.139080 | 0.779158  |
| C | 1.709355  | -0.214378 | 1.190254  |
| N | 1.020379  | -0.854922 | 0.000667  |
| C | 1.709466  | -0.216536 | -1.189848 |
| C | 3.186320  | -0.146333 | -0.779730 |
| C | -0.207151 | 2.642574  | -0.000764 |
| O | -1.172625 | 3.310115  | -0.001190 |
| H | -0.688775 | -2.915028 | 0.001147  |
| H | -3.173761 | -2.797089 | 0.000628  |
| H | -4.302201 | -0.573077 | -0.000306 |
| H | -2.950219 | 1.507194  | -0.000726 |
| H | 3.741065  | -0.997304 | 1.166917  |
| H | 3.645988  | 0.762473  | 1.189349  |
| H | 1.248856  | 0.768576  | 1.290599  |
| H | 1.504883  | -0.812405 | 2.078762  |
| H | 1.251963  | 0.767917  | -1.289671 |
| H | 1.502266  | -0.813933 | -2.078162 |
| H | 3.652379  | 0.747987  | -1.198669 |
| H | 3.735298  | -1.012179 | -1.159157 |
| H | 1.259649  | -1.850527 | 0.001430  |

### 1q (E)

$\Delta G = -443.416469$  hartree

|   |           |           |           |
|---|-----------|-----------|-----------|
| C | 0.649930  | -0.191665 | -0.016718 |
| C | 1.146903  | 1.113204  | 0.080222  |
| C | 2.534588  | 1.273812  | 0.095449  |
| C | 3.355333  | 0.140029  | 0.013448  |
| C | 2.785537  | -1.138206 | -0.082512 |
| C | 1.386562  | -1.374181 | -0.102451 |
| C | -3.084627 | 0.163856  | -0.755124 |
| C | -1.605784 | 0.202261  | -1.189407 |
| N | -0.836198 | -0.397369 | -0.031135 |
| C | -1.609001 | 0.024500  | 1.195871  |
| C | -3.070196 | -0.135846 | 0.772131  |
| H | 0.500338  | 1.986098  | 0.142509  |
| H | 2.965763  | 2.268016  | 0.170007  |
| H | 4.437439  | 0.260478  | 0.024720  |
| H | 3.472210  | -1.985048 | -0.143772 |
| H | -3.634187 | -0.608683 | -1.297490 |
| H | -3.560772 | 1.122196  | -0.973861 |
| H | -1.238800 | 1.220946  | -1.317413 |
| H | -1.374732 | -0.371819 | -2.086999 |
| H | -1.346575 | 1.064621  | 1.398265  |
| H | -1.297741 | -0.595221 | 2.037357  |
| H | -3.718035 | 0.537274  | 1.337523  |
| H | -3.406659 | -1.158622 | 0.965230  |
| H | -0.880338 | -1.425236 | -0.103579 |

### 1q (TS4)

$\Delta G = -443.402328$  hartree

|   |           |           |           |
|---|-----------|-----------|-----------|
| C | 0.618990  | 0.027845  | -0.000056 |
| C | 1.287329  | 1.234211  | 0.181108  |
| C | 2.688767  | 1.166769  | 0.175217  |
| C | 3.339761  | -0.063151 | -0.005514 |
| C | 2.611820  | -1.253638 | -0.184590 |
| C | 1.205399  | -1.229970 | -0.186459 |
| C | -3.095220 | 0.261848  | -0.702211 |
| C | -1.622036 | 0.319019  | -1.173282 |
| N | -0.821899 | -0.249498 | -0.041474 |
| C | -1.626977 | -0.056719 | 1.196077  |
| C | -3.047590 | -0.355980 | 0.717070  |
| H | 0.772451  | 2.181504  | 0.320566  |
| H | 3.272335  | 2.072940  | 0.311694  |
| H | 4.427563  | -0.088599 | -0.006565 |
| H | 3.160573  | -2.184708 | -0.321374 |
| H | -3.716061 | -0.328463 | -1.380472 |
| H | -3.513795 | 1.271569  | -0.668232 |
| H | -1.295069 | 1.345276  | -1.363990 |
| H | -1.418790 | -0.276954 | -2.067027 |
| H | -1.523678 | 0.978265  | 1.544578  |
| H | -1.256285 | -0.729785 | 1.973306  |
| H | -3.804777 | 0.061565  | 1.385155  |
| H | -3.198550 | -1.439595 | 0.671553  |
| H | -0.314079 | -1.417924 | -0.213022 |

2q

$\Delta G = -443.496625$  hartree

|   |           |           |           |
|---|-----------|-----------|-----------|
| C | -0.527263 | 0.000018  | -0.000361 |
| C | -1.263328 | -1.210313 | 0.088301  |
| C | -2.658148 | -1.199241 | 0.086301  |
| C | -3.375070 | 0.000004  | 0.000139  |
| C | -2.658194 | 1.199176  | -0.086075 |
| C | 3.078126  | 0.705885  | 0.304275  |
| C | 1.660018  | 1.218925  | 0.013316  |
| N | 0.846469  | -0.000029 | -0.000655 |
| C | 1.660027  | -1.218872 | -0.012799 |
| C | 3.078082  | -0.705918 | -0.304243 |
| H | -0.741736 | -2.157431 | 0.167212  |
| H | -3.189231 | -2.145195 | 0.157403  |
| H | -4.460634 | -0.000059 | 0.000244  |
| H | -3.189204 | 2.145198  | -0.157000 |
| H | 3.238287  | 0.649819  | 1.387128  |
| H | 3.848471  | 1.357083  | -0.117387 |
| H | 1.610995  | 1.739096  | -0.956340 |
| H | 1.308256  | 1.918329  | 0.781277  |
| H | 1.308490  | -1.919357 | -0.779863 |
| H | 1.611111  | -1.737756 | 0.957590  |
| H | 3.237783  | -0.649902 | -1.387165 |
| H | 3.848530  | -1.357148 | 0.117174  |
| C | -1.263326 | 1.210334  | -0.088541 |
| H | -0.741940 | 2.157542  | -0.167571 |

3q

$\Delta G = -480.434320$  hartree

|   |           |           |           |
|---|-----------|-----------|-----------|
| C | 0.540291  | -0.420480 | 0.013549  |
| C | 1.455304  | -1.481355 | 0.016400  |
| C | 2.813221  | -1.162994 | -0.005327 |
| C | 3.247953  | 0.181008  | -0.031472 |
| C | 2.335570  | 1.234855  | -0.034382 |
| C | 0.956476  | 0.951522  | -0.008153 |
| C | -2.798749 | 0.876331  | 0.110608  |
| C | -1.298677 | 0.887683  | 0.027959  |
| N | -0.835456 | -0.412779 | 0.019577  |
| C | -1.887379 | -1.421021 | 0.122699  |
| C | -3.148194 | -0.598117 | -0.243391 |
| C | -0.235837 | 1.762724  | 0.003405  |
| H | -0.287102 | 2.842826  | -0.005673 |
| H | 1.121661  | -2.514657 | 0.037186  |
| H | 3.548461  | -1.962609 | -0.001383 |
| H | 4.313275  | 0.393858  | -0.048102 |
| H | 2.684567  | 2.264207  | -0.052808 |
| H | -3.271727 | 1.591723  | -0.567718 |
| H | -3.126964 | 1.125970  | 1.127921  |
| H | -1.934973 | -1.820534 | 1.143829  |
| H | -1.708125 | -2.251764 | -0.565165 |
| H | -4.035551 | -0.957940 | 0.281864  |
| H | -3.335212 | -0.682556 | -1.318367 |

H<sub>2</sub>O

$\Delta G = -76.438547$  hartree

|   |          |           |           |
|---|----------|-----------|-----------|
| O | 0.000000 | 0.000000  | 0.117718  |
| H | 0.000000 | 0.766916  | -0.470872 |
| H | 0.000000 | -0.766916 | -0.470872 |

CO

$\Delta G = -113.332229$  hartree

|   |          |          |           |
|---|----------|----------|-----------|
| C | 0.000000 | 0.000000 | -0.649817 |
| O | 0.000000 | 0.000000 | 0.487363  |
